# Supplementary material for: Expedient radical phosphonylations via ligand to metal charge transfer on bismuth
Source: Royal Society of Chemistry journal article supplement (doi:10.1039/d4sc00692e), 2024-01-01

# Expedient Radical Phosphonylations *via* Ligand to Metal Charge Transfer on Bismuth

Jatin Patra, Akshay M. Nair, Chandra M. R. Volla\*

Department of Chemistry, Indian Institute of Technology Bombay

Powai, Mumbai-400076, India.

E-mail: [chandra.volla@chem.iitb.ac.in](mailto:chandra.volla@chem.iitb.ac.in)

## Supporting Information

### Table of contents

|           |                                                                      |            |
|-----------|----------------------------------------------------------------------|------------|
| <b>1</b>  | <b>General considerations and reagent information</b>                | <b>S2</b>  |
| <b>2</b>  | <b>General procedures for the synthesis of starting materials</b>    | <b>S3</b>  |
| <b>3</b>  | <b>Spectroscopy data for new starting materials</b>                  | <b>S10</b> |
| <b>4</b>  | <b>Optimization of the reaction conditions</b>                       | <b>S13</b> |
| <b>5</b>  | <b>General synthetic procedures</b>                                  | <b>S16</b> |
| <b>6</b>  | <b>Failed substrates</b>                                             | <b>S18</b> |
| <b>7</b>  | <b>Mechanistic investigation</b>                                     | <b>S18</b> |
| <b>8</b>  | <b>Proposed Mechanisms</b>                                           | <b>S26</b> |
| <b>9</b>  | <b>Spectroscopic data of final products</b>                          | <b>S28</b> |
| <b>10</b> | <b>References</b>                                                    | <b>S67</b> |
| <b>11</b> | <b>X-ray Crystallography data for the compound</b>                   | <b>S69</b> |
| <b>12</b> | <b><sup>1</sup>H and <sup>13</sup>C NMR spectra of the compounds</b> | <b>S75</b> |

## 1. General considerations reagent information.

Unless otherwise stated, all reactions were carried out under air atmosphere in screw cap reaction tubes. All the solvents were bought from Aldrich in sure-seal bottle and were used as received. For column chromatography, silica gel (100–200 mesh) from Finar Co. was used. A gradient elution using petroleum ether and ethyl acetate was performed based on Merck aluminum TLC sheets (silica gel 60F254) that visualized under UV light irradiation (254 nm). Starting materials and reagents were purchased from commercial suppliers (Sigma Aldrich, Alfa Aesar, spectrochem, TCI and BLD pharma.) and were used without further purification. BiCl<sub>3</sub> and n-Bu<sub>4</sub>NCl were stored and weighed out in glovebox.

### a) Analytical information

All isolated compounds are characterized by <sup>1</sup>H-NMR, <sup>13</sup>C-NMR, and <sup>31</sup>P-NMR spectroscopy. In addition, all the compounds are further characterized by HRMS. HRMS spectra were recorded by EI, ESI, FI method. Copies of NMR data can be found in the supporting information. Nuclear magnetic resonance spectra were recorded either on a Bruker 500 or a 400 MHz instrument. All <sup>1</sup>H-NMR experiments were reported in units, parts per million (ppm), and were measured relative to the signals for residual chloroform (7.26 ppm) in the deuterated solvent, unless otherwise stated. Abbreviations used for signal multiplicity: <sup>1</sup>H-NMR: br = broad, s = singlet, d = doublet, t = triplet, q = quartet, dd = doublet of doublets, ddd = doublet of doublet of doublets, dt = doublet of triplets, and m = multiplet. All <sup>13</sup>C-NMR spectra were reported in ppm relative to deuterated chloroform (77.16 ppm), unless otherwise stated, and all were obtained with <sup>1</sup>H decoupling. All <sup>31</sup>P-NMR were obtained with <sup>13</sup>C decoupling.

### b) Photoredox setup in batch reactions

In order to set up the photoreactions on 40W LEDs, an 8 ml glass vial is positioned in the middle of a stir plate. To ensure that reaction tubes are equally exposed to the LEDs (at around 4 cm from the light source), two parallel LED lamps (Kessil PR160L 390nm) are mounted perpendicular to the sidewall of reaction tubes. Throughout the reaction, a clip fan (12-Inch fan) on the side of response tubes is always on.

*Note: The fan is required to stabilise the reaction temperature (below 35 °C) for repeatable results and to balance the heat produced by the LED light.*

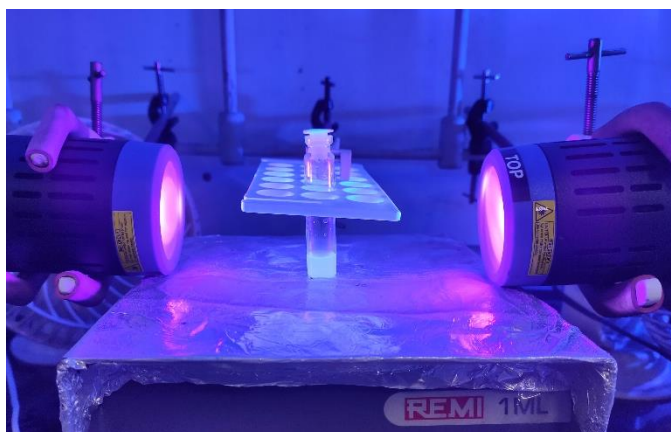

**Figure S1.** Photochemical reaction setup

## 2. General procedures for the synthesis of starting materials

Substrates **2g**, **2ah- 2ak**, **3a**, **3b**, **3i** were purchased from commercial sources and used as received.

### General procedure A

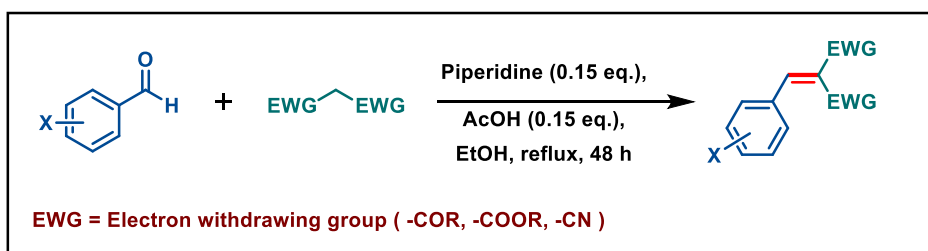

Starting aldehyde (1equiv.), active methylene compound (1.1 equiv.), piperidine (0.15 equiv.), glacial acetic acid (0.15 equiv.) and absolute ethanol (10 mL/mmol of aldehyde) were introduced in a round-bottom flask with a condenser. The mixture is heated at reflux for 48 hours. Then, the solvent is evaporated and a work up with brine and dichloromethane is performed. The residue was either distilled (when liquid) or recrystallized from ethanol (when solid) to obtain the purified activated olefin. NMR spectra and melting points for the thus obtained compounds **2a-2f**, **2k-2u** agreed with literature values.

Note: Natural product tethered aldehydes for **2o-2q** were synthesized following the general procedure **E**.

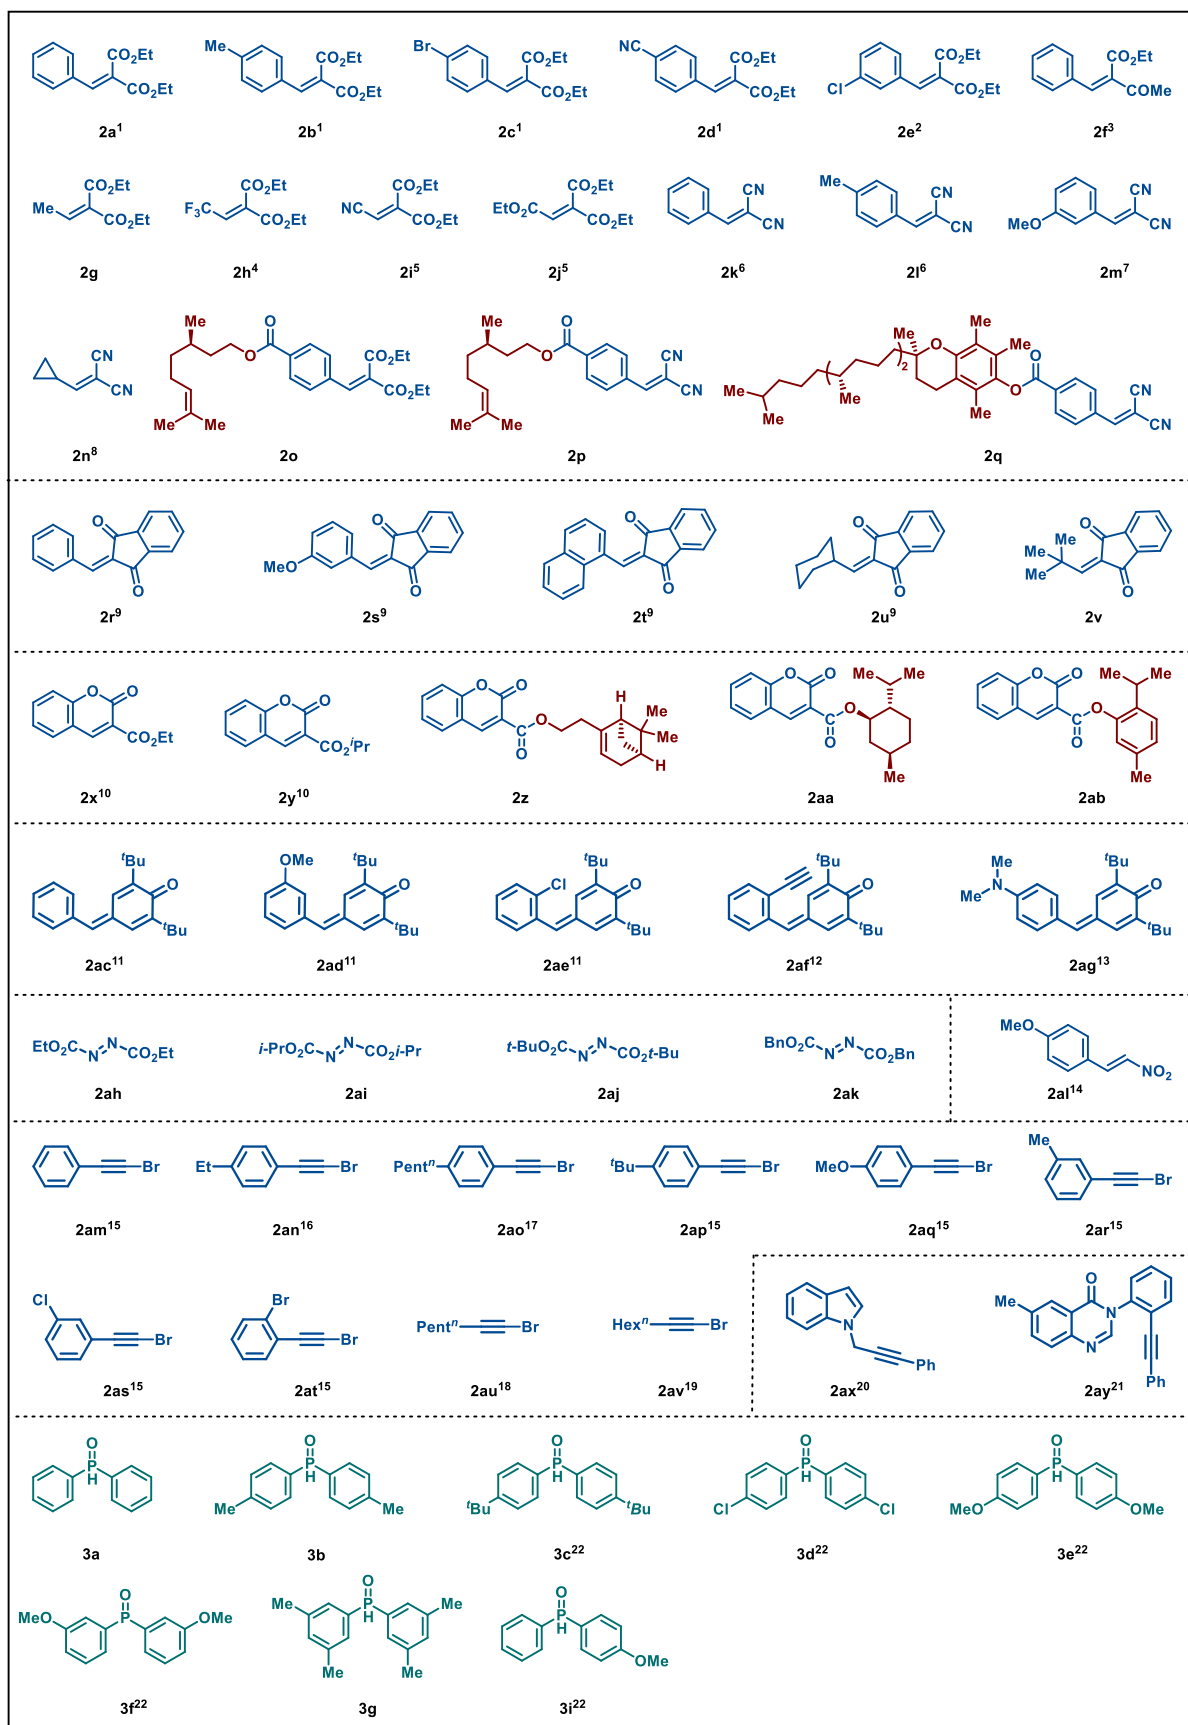

Scheme S1. List of starting materials



## General procedure B

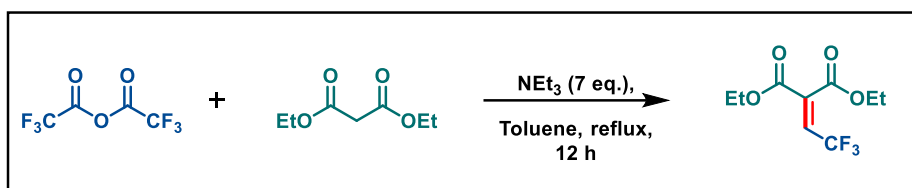

The 1,3-dicarbonyl substrate (0.50 mmol), trifluoroacetic anhydride ((2.50 mmol, 5.0 equiv.), Et<sub>3</sub>N (3.5 mmol, 7.0 equiv.), and toluene (5.0 mL) were added to a reaction tube equipped with a stir bar. The mixture was stirred at 100 °C for 20 h. The reaction mixture was diluted with ethyl acetate (30 mL), washed with saturated brine (30 mL), and water (20 mL), dried over MgSO<sub>4</sub>. The solvent was removed by rotary evaporation and the resulting product **2h** was purified by column chromatography over silica gel. NMR spectra for obtained compound agreed with literature value.

## General procedure C

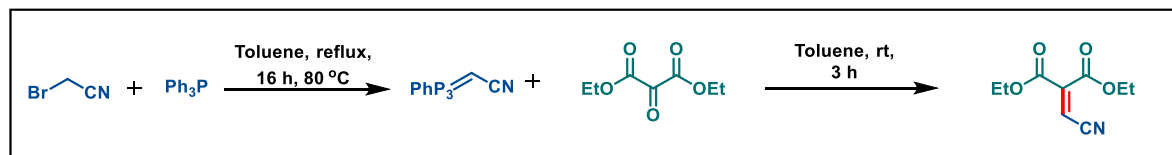

An oven dried round bottom flask equipped with magnetic stir bar was charged with bromoacetonitrile (2.62 g, 21.8 mmol), triphenylphosphine (5.83 g, 22.2 mmol) and toluene (25 mL). The reaction mixture stirred for 16 h at 85 °C. The solvent was evaporated in vacuo, and the residue was then dissolved in CH<sub>2</sub>Cl<sub>2</sub> (10 mL). To this solution 2M NaOH (20 mL) was added and the reaction mixture stirred for 3 h. The organic layer was separated, and the aqueous layer was extracted with CH<sub>2</sub>Cl<sub>2</sub> (3 × 20 mL). The combined organic layers were washed with brine, and then dried over Na<sub>2</sub>SO<sub>4</sub>. After removal of all volatiles in vacuo (Triphenylphosphoranylidene)acetonitrile was obtained as a white solid. Without further purification it was added to a round bottom flask containing Diethyl Benzylidenemalonates and toluene (25 mL) and allowed to stir for 3 hours at room temperature to afford product **2i**. NMR spectra for obtained compound agreed with literature value.

## General procedure D

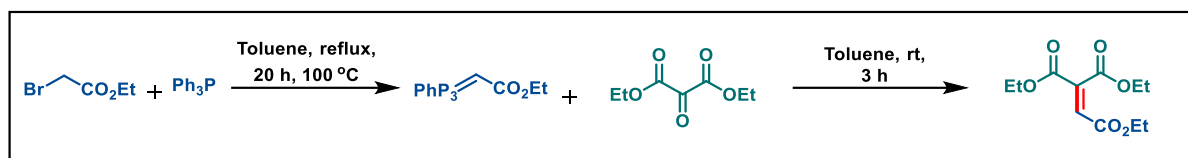

An oven dried round bottom flask equipped with a magnetic stir bar was charged with ethyl 2-bromoacetate (1.00 g, 6.00 mmol), triphenylphosphine (1.75 g, 6.67 mmol) and toluene (25 mL). The reaction mixture was heated to 100 °C and stirred for 20 h. The formed precipitate was filtered off and washed with toluene (3 × 15 mL). After all volatiles were removed in vacuo the resulting solid was dissolved in water (10 mL). Subsequently 1M NaOH (20 mL) was added. The reaction mixture was vigorously shaken for 20 min. The formed precipitate was filtered off, washed with diethyl ether (3 × 15 mL) and dried in vacuo to yield ethyl (triphenylphosphoranylidene)acetate as white a solid. Without further purification it was added to a round bottom flask containing diethyl 2,3,4-trioxopentanedioate and toluene (25 mL) and allowed to stir for 3 hours at room temperature to afford product **2j**. NMR spectra for obtained compound agreed with literature value.

## General procedure E

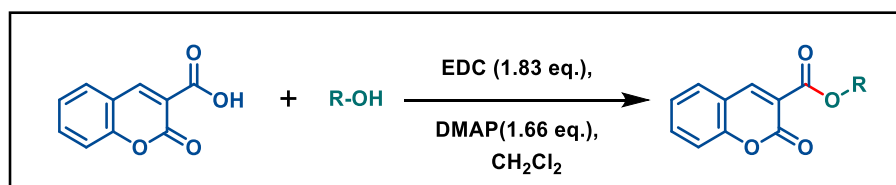

A solution of alcohol, 2-oxo-2H-chromene-3-carboxylic acid (1.1 equiv.), EDC (1.83 equiv. and DMAP (1.66 equiv.) in dry CH<sub>2</sub>Cl<sub>2</sub> was stirred at room temperature overnight. The reaction mixture was diluted with 2N HCl and extracted with ethyl acetate. The organic phase was washed with saturated NaHCO<sub>3</sub> and brine until neutral, dried Na<sub>2</sub>SO<sub>4</sub>, and evaporated under vacuum. The residue was chromatographed on silica gel with petroleum ether/ethyl acetate =98/2 as eluent to afford products **2x-2ab**. NMR spectra for obtained compounds agreed with literature value.

## General procedure F

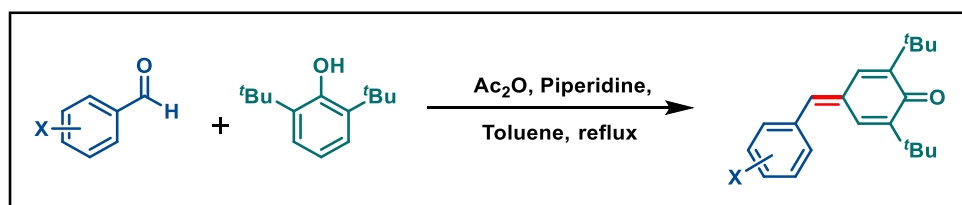

The aldehyde (10 mmol) was added to a solution of the phenol (10 mmol) in toluene (40 mL). The reaction mixture was heated in a Dean-Stark apparatus to reflux. Piperidine (20 mmol) was added dropwise over 1h, and heating was continued until all starting material had been consumed. After the mixture had cooled just below the boiling point of toluene (100 °C), acetic anhydride (20 mmol) was added, and the solution was stirred for 15 min. The residue was extracted three times with dichloromethane. The combined organic layers were washed with water and brine sequentially, dried over magnesium sulphate, filtered, and concentrated. The crude product was purified by flash column chromatography on silica gel to afford the corresponding products **2ac-2ag**. NMR spectra for obtained compounds agreed with literature value.

## General procedure G

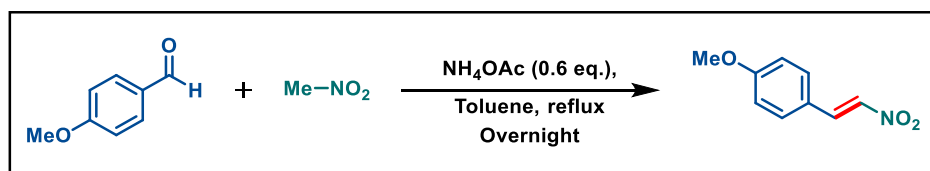

Nitromethane (80 equiv.) was added to a solution of 4-methoxy benzaldehyde and ammonium acetate (0.6 equiv.) in toluene and heated at 100 °C overnight. After the solution had cooled, water was added and the resulting mixture was extracted with ethyl acetate (3 × 20 mL). The organic layer was washed with water (3 × 30 mL), brine (2 × 30 mL) and dried with Na<sub>2</sub>SO<sub>4</sub>. Solvent was removed under vacuum to give the corresponding β-nitrostyrene **2al**. The crude product was further purified using silica column chromatography using EtOAc: Hexanes (30:70). NMR spectra for obtained compounds agreed with literature value.

## General procedure H

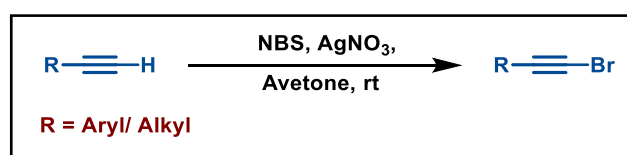

To the mixture of terminal alkyne (10 mmol), NBS (12 mmol) and 30 mL acetone, AgNO<sub>3</sub> (10 mol %) was added and the mixture was stirred at room temperature for five hours. After completion of the reaction, the mixture was filtered. And the filtrate was added 30mL of water, extracted with diethyl ether (30 mL x 3), The organic phase was washed with brine, dried over anhydrous MgSO<sub>4</sub>, filtered, and concentrated under reduced pressure. The residue was purified by column chromatography to give alkynyl bromides **3am-3av**. NMR spectra for obtained compounds agreed with literature value.

### General procedure I

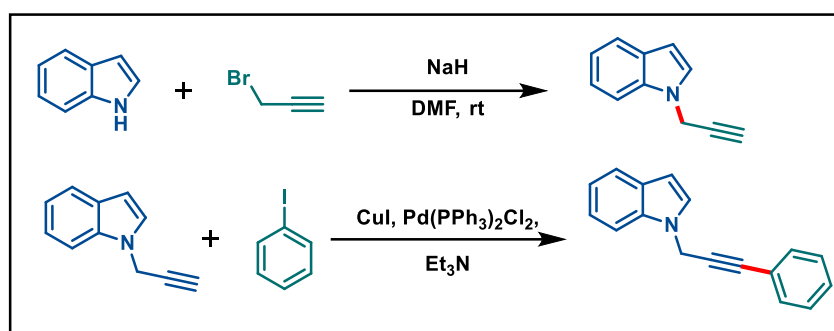

To a solution of the indole (20 mmol) in DMF (50 mL) was added NaH ((40 mmol) slowly at 0 °C. The resulting solution was stirred for 1 h at 0 °C. Then, the propargylic bromide (40 mmol) was added dropwise through a syringe. The reaction mixture was stirred at room temperature for another 2 h. When the reaction was considered complete as determined by TLC analysis, the mixture was quenched with water (40 mL) and extracted with ethyl acetate (3 × 30 mL). The combined organic layers were dried over anhydrous Na<sub>2</sub>SO<sub>4</sub>, the organic phase was concentrated under reduced pressure and purified by silica gel flash column chromatography (petroleum ether/ ethyl acetate: 30/1).

An oven-dried round bottom flask (250 mL) with a magnetic stir bar was charged with previous product (1.16 g, 6.9 mmol, 1.0 equiv.), triethylamine (45 mL), iodobenzene (1.55 g, 7.6 mmol, 1.1 equiv.), bis(triphenylphosphine)palladium dichloride (96.9 mg, 0.14 mmol, 0.02 equiv.), and copper iodide (13.4 mg, 0.07 mmol, 0.01 equiv.). The reaction mixture is stirred at 40 °C for 6 h. The reaction mixture was filtered, and then diluted with 150 mL of ethyl acetate. The mixture was washed with brine three times. The combined organic phases are dried over anhydrous Na<sub>2</sub>SO<sub>4</sub>, filtered, and concentrated under vacuum and the crude product was purified by silica gel chromatography using a (petroleum ether/ ethyl acetate: 20/1) mixture as the eluent to give the product **2ax** as a yellowish oil. NMR spectra for obtained compound agreed with literature value.

## General procedure J

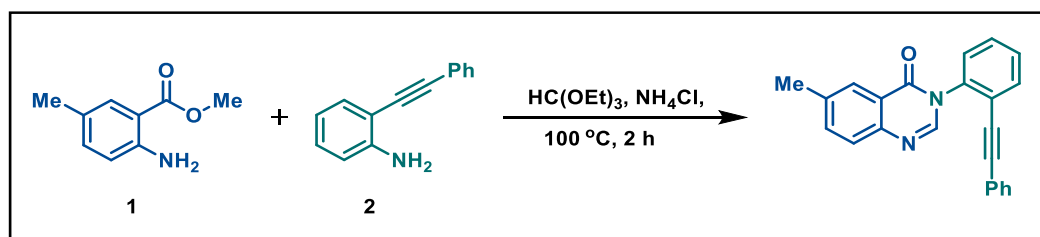

A mixture of **1** (3 mmol, 1 equiv.) and **2** (3.6 mmol, 1.2 equiv.), triethyl orthoformate (4.5 mmol, 1.5 equiv.), and  $\text{NH}_4\text{Cl}$  (1.2 mmol, 0.4 equiv.) were heated with stirring at  $100\text{ }^\circ\text{C}$  in oil bath for 1 h. After cooling, 15 mL  $\text{H}_2\text{O}$  was added and the product was extracted with  $\text{CH}_2\text{Cl}_2$  (3 x 15 mL). The organic layer was dried with anhydrous  $\text{Na}_2\text{SO}_4$ , and the solvent was evaporated under a vacuum. Crude product was purified by silica gel chromatography using petroleum ether and ethyl acetate as eluent to give the desired product **2ay**. NMR spectra for obtained compound agreed with literature value.

## General procedure K

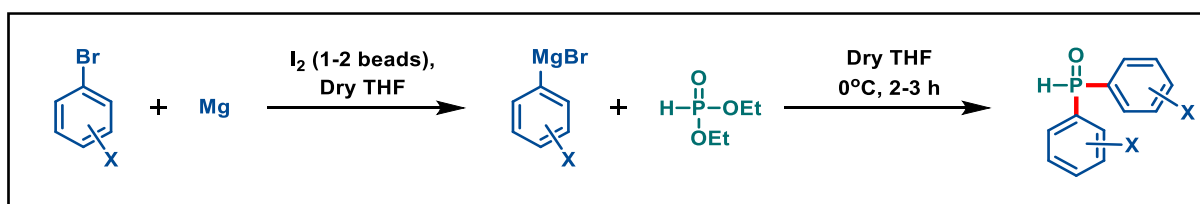

Diethylphosphite (1.29 ml, 10.0 mmol) was added dropwise at  $0\text{ }^\circ\text{C}$  to a solution of phenyl magnesium bromide in tetrahydrofuran, which was prepared from arylbromides (32.6 mmol) and magnesium (0.95g, 39.6 mmol). The mixture was aged for 15 minutes at  $0\text{ }^\circ\text{C}$ , then stirred at ambient temperature for two hours. After that, it was cooled again to  $0\text{ }^\circ\text{C}$  and 75 ml  $\text{NH}_4\text{Cl}$  aqueous was washed with aqueous  $\text{NaHCO}_3$  and brine, then it was dried over  $\text{Na}_2\text{SO}_4$ . After the solvent had been completely removed, the residue was purified by column chromatography on silica gel to give the products **3c-3g**. NMR spectra for obtained compounds agreed with literature value.

### 3. Spectroscopy data for new starting materials

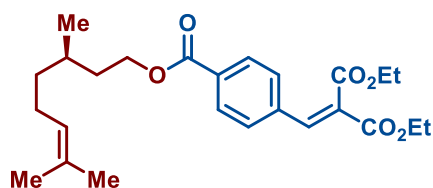

2o

#### *diethyl (R)-2-(4-(((3,7-dimethyloct-6-en-1-yl)oxy)carbonyl)benzylidene)malonate*

86% yield, Colourless oil

*R<sub>f</sub>*: 0.80 (hexane/ethyl acetate, 1:9 v/v)

<sup>1</sup>H NMR (500 MHz, CDCl<sub>3</sub>) δ 8.02 (d, *J* = 8.5 Hz, 2H), 7.74 (s, 1H), 7.49 (d, *J* = 8.4 Hz, 2H), 5.08 (m, 1H), 4.41 – 4.23 (m, 5H), 1.99 (m, 2H), 1.80 (m, 1H), 1.66 (s, 3H), 1.64 – 1.60 (m, 1H), 1.59 (s, 3H), 1.54 (dd, *J* = 7.8, 6.2 Hz, 1H), 1.43 – 1.35 (m, 1H), 1.33 (t, *J* = 7.2 Hz, 3H), 1.27 (m, 4H), 1.23 – 1.17 (m, 1H), 0.95 (d, *J* = 6.6 Hz, 3H).

<sup>13</sup>C NMR (126 MHz, CDCl<sub>3</sub>) δ 166.3, 165.9, 163.8, 140.9, 137.2, 132.0, 131.5, 130.0, 129.3, 128.4, 124.6, 63.9, 62.0, 37.0, 35.5, 29.6, 25.8, 25.5, 19.6, 17.8, 14.2, 14.0.

HRMS (ESI-TOF) *m/z*: [M + Na]<sup>+</sup> Calcd. for C<sub>25</sub>H<sub>34</sub>NaO<sub>6</sub> 453.2248; Found 453.2224.

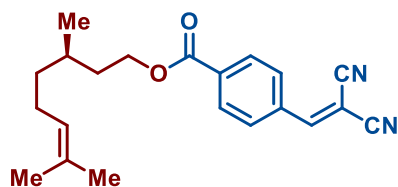

2p

#### *(R)-3,7-dimethyloct-6-en-1-yl 4-(2,2-dicyanovinyl)benzoate*

92% yield, White solid

*R<sub>f</sub>*: 0.80 (hexane/ethyl acetate, 1:9 v/v)

<sup>1</sup>H NMR (500 MHz, CDCl<sub>3</sub>) δ 8.20 (d, *J* = 8.5 Hz, 2H), 7.99 (d, *J* = 8.5 Hz, 2H), 7.87 (s, 1H), 5.15 – 5.08 (m, 1H), 4.48 – 4.36 (m, 2H), 2.14 – 1.93 (m, 2H), 1.90 – 1.80 (m, 1H), 1.69 (s, 3H), 1.67 – 1.64 (m, 1H), 1.62 (s, 3H), 1.61 – 1.58 (m, 1H), 1.48 – 1.33 (m, 1H), 1.32 – 1.20 (m, 1H), 1.00 (d, *J* = 6.5 Hz, 3H).

$^{13}\text{C}$  NMR (126 MHz,  $\text{CDCl}_3$ )  $\delta$  165.1, 158.7, 135.4, 134.3, 131.6, 130.6, 130.5, 124.5, 113.33, 112.2, 85.4, 64.4, 37.0, 35.5, 29.6, 25.8, 25.5, 19.6, 17.8.

HRMS (ESI-TOF)  $m/z$ :  $[\text{M} + \text{Na}]^+$  Calcd. for  $\text{C}_{21}\text{H}_{24}\text{N}_2\text{NaO}_2$  359.1730; Found 359.1730.

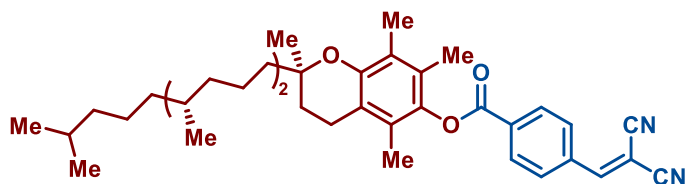

2q

*(R)*-2,5,7,8-tetramethyl-2-((4*R*,8*R*)-4,8,12-trimethyltridecyl) chroman-6-yl 4-(2,2-dicyanovinyl) benzoate

88% yield, White sticky solid

$R_f$ : 0.70 (hexane/ethyl acetate, 1:9 v/v)

$^1\text{H}$  NMR (400 MHz,  $\text{CDCl}_3$ )  $\delta$  8.55 – 8.36 (m, 2H), 8.10 – 7.96 (m, 2H), 7.88 (s, 1H), 2.64 (t,  $J = 6.8$  Hz, 2H), 2.14 (s, 3H), 2.07 (s, 3H), 2.04 (s, 3H), 1.84 (m, 2H), 1.56 (m, 2H), 1.48 – 1.39 (m, 4H), 1.34 – 1.26 (m, 9H), 1.21 – 1.08 (m, 7H), 0.89 (dd,  $J = 6.9, 5.5$  Hz, 13H).

$^{13}\text{C}$  NMR (101 MHz,  $\text{CDCl}_3$ )  $\delta$  163.8, 158.6, 149.8, 140.5, 134.9, 134.3, 131.0, 130.6, 126.7, 125.0, 123.4, 117.7, 113.3, 112.1, 85.5, 75.2, 39.4, 37.61, 37.58, 37.51, 37.46, 37.44, 37.40, 37.3, 32.8, 32.8, 32.7, 28.0, 24.9, 24.8, 24.5, 22.8, 22.7, 21.1, 20.7, 19.8, 19.8, 19.7, 19.7, 19.67, 13.1, 12.3, 11.9.

HRMS (ESI-TOF)  $m/z$ :  $[\text{M} + \text{K}]^+$  Calcd. for  $\text{C}_{40}\text{H}_{54}\text{KN}_2\text{O}_3$  649.3766; Found 649.3729.

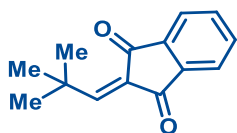

2v

2-(2,2-dimethylpropylidene)-1*H*-indene-1,3(2*H*)-dione

71% yield, Colourless oil

$R_f$ : 0.70 (hexane/ethyl acetate, 1:9 v/v)

$^1\text{H}$  NMR (500 MHz,  $\text{CDCl}_3$ )  $\delta$  7.98 (m, 2H), 7.86 – 7.77 (m, 2H), 7.44 (s, 1H), 1.42 (s, 9H).

$^{13}\text{C}$  NMR (126 MHz,  $\text{CDCl}_3$ )  $\delta$  189.9, 189.0, 164.4, 142.7, 140.2, 135.5, 135.3, 130.9, 123.6, 123.4, 34.6, 29.6.

HRMS (ESI-TOF)  $m/z$ :  $[\text{M} + \text{H}]^+$  Calcd. for  $\text{C}_{14}\text{H}_{15}\text{O}_2$  215.1067; Found 215.1054.

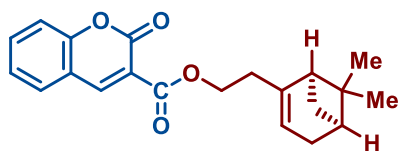

2z

*2-((1R,5S)-6,6-dimethylbicyclo [3.1.1] hept-2-en-2-yl) ethyl 2-oxo-2H-chromene-3-carboxylate*

85% yield, Light yellow sticky solid

$R_f$ : 0.70 (hexane/ethyl acetate, 1:9 v/v)

$^1\text{H}$  NMR (400 MHz,  $\text{CDCl}_3$ )  $\delta$  8.47 (s, 1H), 7.70 – 7.52 (m, 2H), 7.39 – 7.27 (m, 2H), 5.33 (tt,  $J = 3.0, 1.5$  Hz, 1H), 4.40 – 4.28 (m, 2H), 2.41 (m, 2H), 2.35 (dt,  $J = 8.5, 5.6$  Hz, 1H), 2.28 – 2.13 (m, 2H), 2.11 – 1.99 (m, 2H), 1.24 (s, 3H), 1.14 (d,  $J = 8.6$  Hz, 1H), 0.81 (s, 3H).

$^{13}\text{C}$  NMR (101 MHz,  $\text{CDCl}_3$ )  $\delta$  162.8, 156.6, 155.2, 148.6, 143.8, 134.4, 129.6, 124.9, 119.2, 118.2, 117.9, 116.8, 64.1, 45.7, 40.7, 38.0, 35.9, 31.7, 31.4, 26.3, 21.2.

HRMS (ESI-TOF)  $m/z$ :  $[\text{M} + \text{H}]^+$  Calcd. for  $\text{C}_{21}\text{H}_{23}\text{O}_4$  339.1591; Found 339.1569.

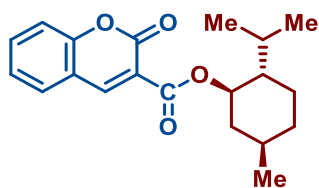

2aa

*(1R,2S,5R)-2-isopropyl-5-methylcyclohexyl 2-oxo-2H-chromene-3-carboxylate*

94% yield, White solid

$R_f$ : 0.75 (hexane/ethyl acetate, 1:9 v/v)



$^1\text{H NMR}$  (500 MHz,  $\text{CDCl}_3$ )  $\delta$  8.42 (s, 1H), 7.62 – 7.51 (m, 2H), 7.28 (dd,  $J = 8.2, 5.9$  Hz, 2H), 4.90 (m, 1H), 2.08 (m, 1H), 1.96 (m, 1H), 1.67 (m, 2H), 1.50 (m, 2H), 1.14 – 1.01 (m, 2H), 0.88 (d,  $J = 1.7$  Hz, 4H), 0.87 (d,  $J = 2.1$  Hz, 4H), 0.75 (d,  $J = 7.0$  Hz, 3H).

$^{13}\text{C NMR}$  (126 MHz,  $\text{CDCl}_3$ )  $\delta$  162.5, 156.6, 155.0, 148.0, 134.2, 129.5, 124.8, 118.7, 117.9, 116.6, 76.0, 46.9, 40.7, 34.1, 31.4, 26.1, 23.3, 22.0, 20.8, 16.2.

HRMS (ESI-TOF)  $m/z$ :  $[\text{M} + \text{H}]^+$  Calcd. for  $\text{C}_{20}\text{H}_{25}\text{O}_4$  329.1747; Found 329.1728.

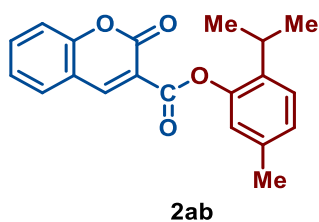

#### *2-isopropyl-5-methylphenyl 2-oxo-2H-chromene-3-carboxylate*

91% yield, White solid

$R_f$ : 0.75 (hexane/ethyl acetate, 1:9 v/v)

$^1\text{H NMR}$  (500 MHz,  $\text{CDCl}_3$ )  $\delta$  8.75 (s, 1H), 7.76 – 7.65 (m, 2H), 7.48 – 7.34 (m, 2H), 7.30 – 7.24 (m, 1H), 7.10 (dd,  $J = 8.0, 1.7$  Hz, 1H), 6.98 (d,  $J = 1.9$  Hz, 1H), 3.14 (hept,  $J = 6.9$  Hz, 1H), 2.36 (s, 3H), 1.25 (d,  $J = 6.9$  Hz, 6H).

$^{13}\text{C NMR}$  (126 MHz,  $\text{CDCl}_3$ )  $\delta$  162.1, 156.5, 155.5, 149.9, 147.8, 137.2, 136.8, 134.9, 129.9, 127.6, 126.6, 125.1, 122.7, 117.9, 117.7, 117.0, 27.2, 23.2, 20.9.

HRMS (ESI-TOF)  $m/z$ :  $[\text{M} + \text{H}]^+$  Calcd. for  $\text{C}_{20}\text{H}_{19}\text{O}_4$  323.1278; Found 323.1292.

## 4. Optimization of the reaction conditions

### a) Screening of metal catalysts

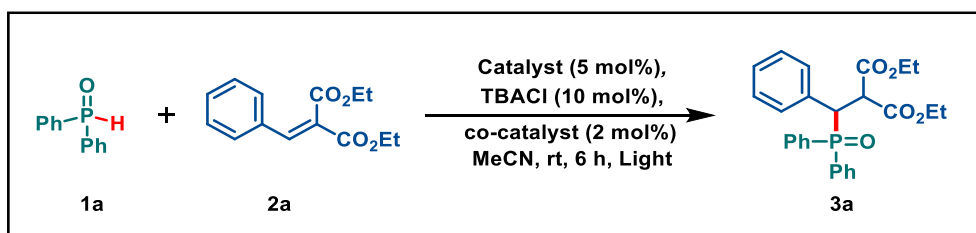

| Entry | Catalysts         | co-catalyst | Light source | % Yields <sup>[b]</sup> |
|-------|-------------------|-------------|--------------|-------------------------|
| 1.    | CeCl <sub>3</sub> | -           | 390 nm       | 64                      |
| 2.    | CeCl <sub>3</sub> | DPA         | 390 nm       | 11                      |
| 3.    | CeCl <sub>3</sub> | -           | 467 nm       | 43                      |
| 4.    | FeCl <sub>3</sub> | -           | 390 nm       | NR                      |
| 5.    | FeCl <sub>3</sub> | DPA         | 390 nm       | Trace                   |
| 6.    | CuCl <sub>2</sub> | -           | 390 nm       | NR                      |
| 7.    | CuCl <sub>2</sub> | DPA         | 390 nm       | NR                      |
| 8.    | NiCl <sub>2</sub> | -           | 467 nm       | NR                      |
| 9.    | NiCl <sub>2</sub> | DPA         | 467 nm       | NR                      |
| 10.   | BiCl <sub>3</sub> | -           | 390 nm       | 87                      |
| 11.   | BiCl <sub>3</sub> | DPA         | 390 nm       | 75                      |
| 12.   | CrCl <sub>2</sub> | -           | 390 nm       | NR                      |
| 13.   | CrCl <sub>2</sub> | DPA         | 390 nm       | NR                      |
| 14.   | ZnCl <sub>2</sub> | -           | 467 nm       | NR                      |
| 15.   | ZnCl <sub>2</sub> | DPA         | 467 nm       | Trace                   |
| 16.   | LaCl <sub>3</sub> | -           | 390 nm       | NR                      |
| 17.   | LaCl <sub>3</sub> | DPA         | 390 nm       | NR                      |
| 18.   | CoCl <sub>2</sub> | -           | 467 nm       | NR                      |
| 19.   | CoCl <sub>2</sub> | DPA         | 467 nm       | Trace                   |
| 20.   | AlCl <sub>3</sub> | -           | 390 nm       | NR                      |
| 21.   | AlCl <sub>3</sub> | DPA         | 390 nm       | NR                      |

[a] Reactions were carried out with **1a** (0.12 mmol), **2a** (0.1 mmol), Catalyst (5 mol%), TBACl (10 mol%), and MeCN (1.0 mL) at ambient temperature using 390/ 467 nm LED lamps irradiation. [b] NMR yields using *1,3,5-trimethoxy benzene* as internal standard.

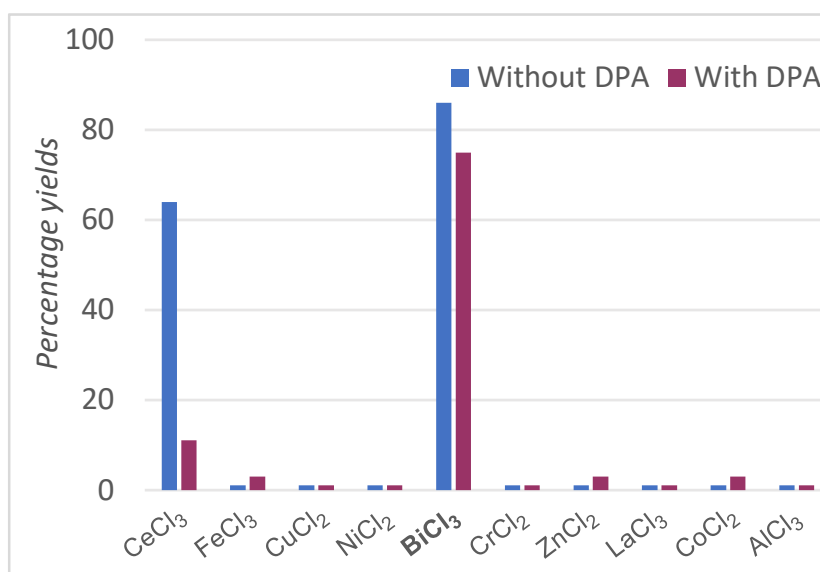

**Figure S2.** Graphical representation of metal catalyst screening

**b) Optimization of reaction conditions *via* bismuth catalyst and solvents screening**

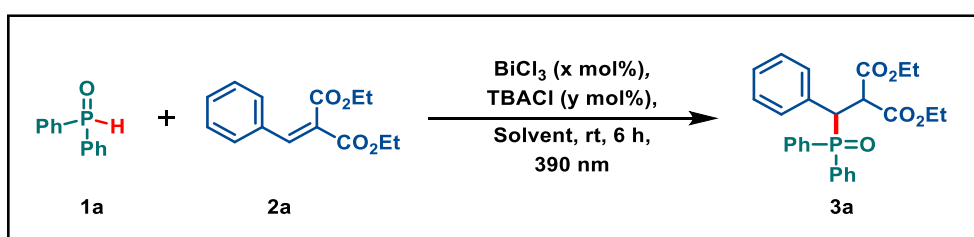

| Entry              | x | y  | Solvent | % Yields <sup>[b]</sup> |
|--------------------|---|----|---------|-------------------------|
| 1.                 | 5 | 10 | MeCN    | 87                      |
| 2.                 | 5 | 10 | DCM     | 24                      |
| 3.                 | 5 | 10 | DMF     | 34                      |
| 4.                 | 5 | 10 | DMSO    | NR                      |
| 5.                 | 5 | 10 | MeOH    | NR                      |
| 6.                 | 5 | 10 | THF     | NR                      |
| 7.                 | 5 | 5  | MeCN    | 73                      |
| 8.                 | 3 | 10 | MeCN    | 84                      |
| 9.                 | 3 | 6  | MeCN    | 86                      |
| 10. <sup>[c]</sup> | 3 | 6  | MeCN    | 81                      |
| 11. <sup>[d]</sup> | 3 | 6  | MeCN    | 68                      |
| 12. <sup>[e]</sup> | 3 | 6  | MeCN    | Trace                   |
| 13. <sup>[f]</sup> | 3 | 6  | MeCN    | 14                      |

|         |   |   |      |       |
|---------|---|---|------|-------|
| 14. [g] | 3 | 6 | MeCN | NR    |
| 15. [h] | 3 | 6 | MeCN | 82    |
| 16. [i] | - | 6 | MeCN | Trace |
| 17. [j] | 3 | - | MeCN | Trace |

[a] Reactions were carried out with **1a** (0.12 mmol), **2a** (0.1 mmol), BiCl<sub>3</sub> (x mol%), TBACl (y mol%), and solvent (1.0 mL) at ambient temperature using 390 nm LED lamp irradiation [b] NMR yields using *1,3,5-trimethoxy benzene* as internal standard [c] 370 nm LED irradiation [d] 467 nm LED irradiation [e] 540 nm LED irradiation [f] White CFL irradiation [g] No light [h] 0.2 mmol of **1a** [i] No BiCl<sub>3</sub> [j] No TBACl.

### c) Screening of bismuth precursors

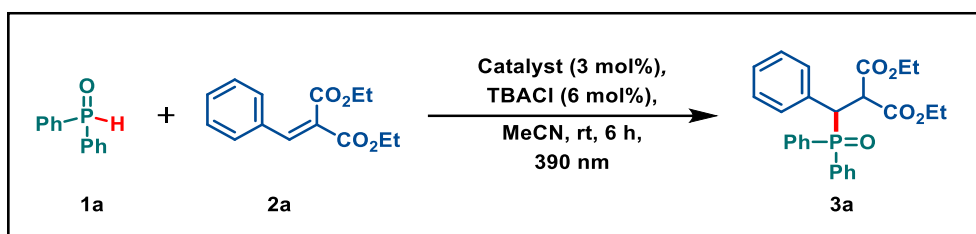

| Entry | catalyst          | % Yields <sup>[b]</sup> |
|-------|-------------------|-------------------------|
| 1.    | BiCl <sub>3</sub> | 86                      |
| 2.    | BiBr <sub>3</sub> | Trace                   |
| 3.    | BiI <sub>3</sub>  | Trace                   |

[a] Reactions were carried out with **1a** (0.12 mmol), **2a** (0.1 mmol), BiCl<sub>3</sub> (3 mol%), TBACl (6 mol%), and MeCN (1.0 mL) at ambient temperature using 390 nm LED lamp irradiation. [b] NMR yields using *1,3,5-trimethoxy benzene* as internal standard.

## 5. General synthetic procedures

### Procedure for phosphonylation of alkenes

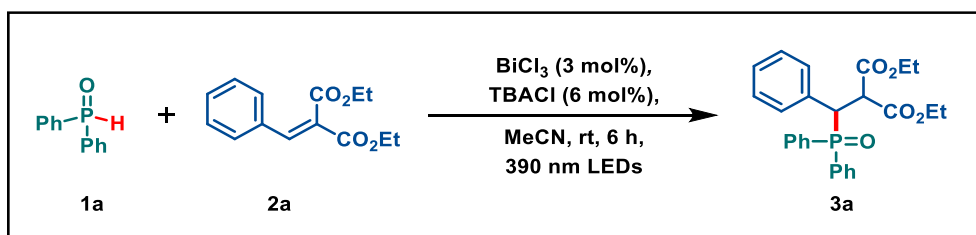

An 8 mL glass vial equipped with a Teflon-coated stirring bar was charged with substrate **1a** (0.12 mmol, 1.2 equiv.), substrate **2a** (0.1 mmol, 1.0 equiv.), BiCl<sub>3</sub> (0.003 mmol, 3 mol%) and

TBACl (0.006 mmol, 6 mol%) in glove box. Then 1 mL anhydrous MeCN was added via syringe and flask was irradiated by 390 nm Kessil LED lamps at ambient temperature with a cooling fan. After the consumption of substrate **2a**, the mixture was concentrated in vacuo, the residue was purified by column chromatography on silica gel (eluting with ethyl acetate and petroleum ether) to afford the desired products **3a**.

### Procedure for dehalogenative phosphorylation

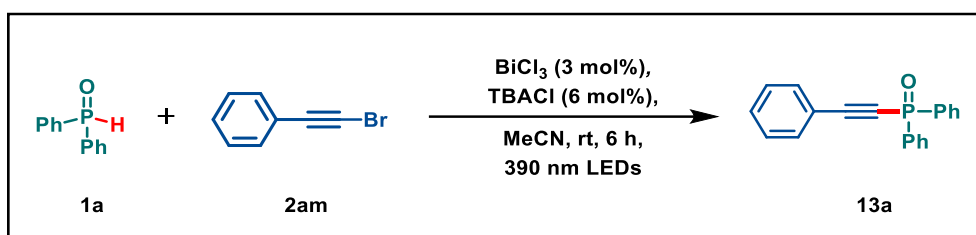

An 8 mL glass vial equipped with a Teflon-coated stirring bar was charged with substrate **1a** (0.12 mmol, 1.2 equiv.), substrate **2am** (0.1 mmol, 1.0 equiv.),  $\text{BiCl}_3$  (0.003 mmol, 3 mol%) and TBACl (0.006 mmol, 6 mol%) in glove box. Then 1 mL anhydrous MeCN was added via syringe and flask was irradiated by 390 nm Kessil LED lamps at ambient temperature with a cooling fan. After 5-6 hours, the mixture was concentrated in vacuo, the residue was purified by column chromatography on silica gel (eluting with ethyl acetate and petroleum ether) to afford the desired products **13a**.

### Procedure for cascade cyclization

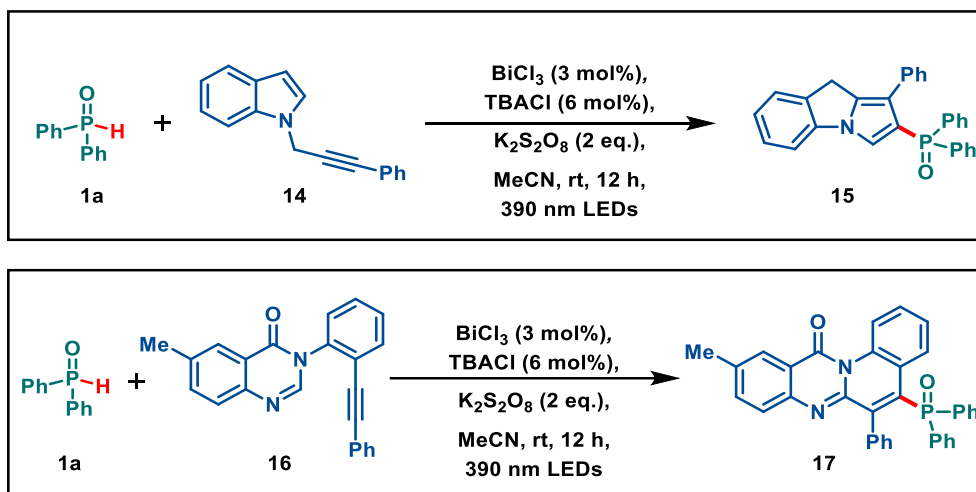

An 8 mL glass vial equipped with a Teflon-coated stirring bar was charged with substrate **1a** (0.3 mmol, 1.5 equiv.), substrate **14** or **16** (0.2 mmol, 1.0 equiv.),  $\text{BiCl}_3$  (0.006 mmol, 3 mol%),  $\text{K}_2\text{S}_2\text{O}_8$  (0.4 mmol, 2 equiv.), and TBACl (0.012 mmol, 6 mol%) in glove box. Then 2 mL anhydrous MeCN was added via syringe and flask was irradiated by 390 nm Kessil LED lamps at ambient temperature with a cooling fan. After 12 hours, the mixture was concentrated in

vacuo, the residue was purified by column chromatography on silica gel (eluting with ethyl acetate and petroleum ether) to afford the desired products **15** or **17**.

## 6. Failed Substrates

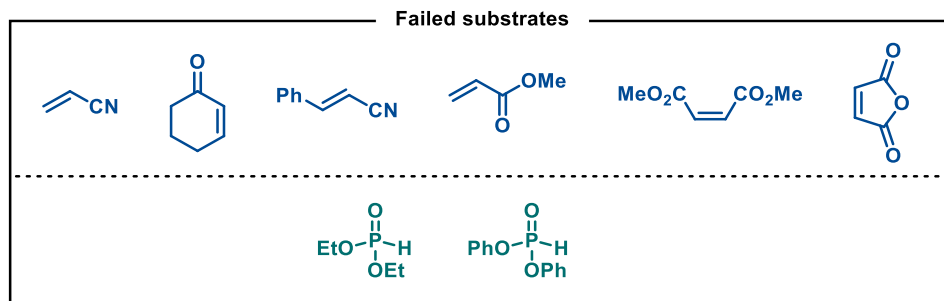

## 7. Mechanistic investigation

### (a) Radical trapping experiments

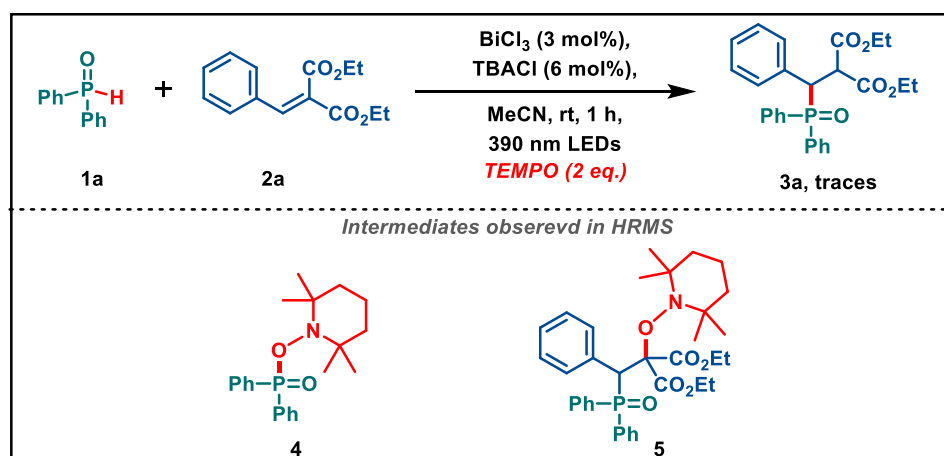

An 8 mL glass vial equipped with a Teflon-coated stirring bar was charged with substrate **1a** (0.12 mmol, 1.2 equiv.), substrate **2a** (0.1 mmol, 1.0 equiv.),  $\text{BiCl}_3$  (0.003 mmol, 3 mol%), TBACl (0.006 mmol, 6 mol%) and TEMPO (31.3 mg, 0.2 mmol, 2.0 equiv.) in glove box. Then 1 mL anhydrous MeCN was added via syringe and flask was irradiated by 390 nm Kessil LED lamps at ambient temperature with a cooling fan. The reaction mixture was then analyzed by HRMS. The HRMS spectrum showed evidence for the formation of **4** and **5**, which demonstrated the existence of phosphonyl radical and carbon centred radical in this reaction condition.



irradiated by 390 nm Kessil LED lamps at ambient temperature with a cooling fan. The reaction mixture was then analyzed by HRMS. The HRMS spectrum showed evidence for the formation of **6**, **7** and **8**, which demonstrated the existence of chlorine radical, phosphonyl radical and carbon centred radical in this reaction condition.

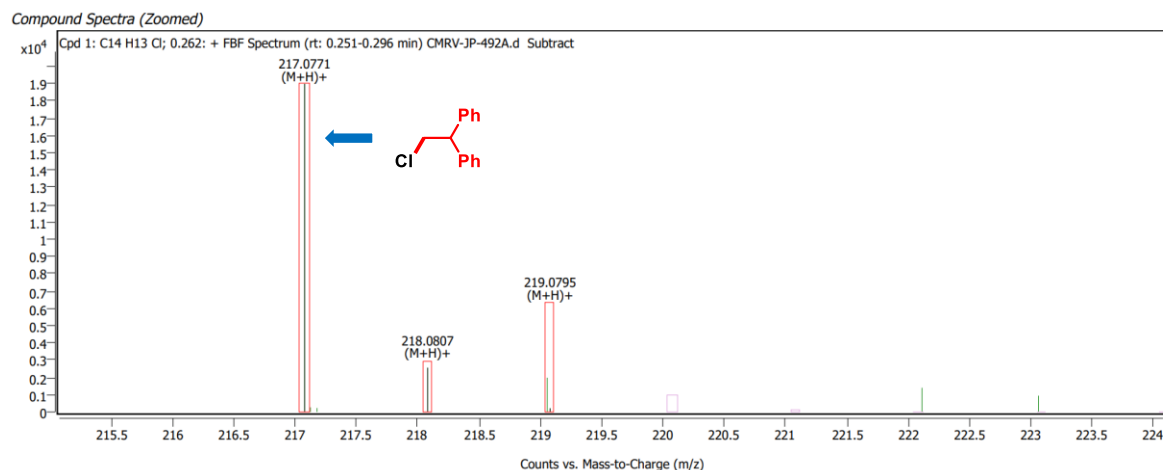

**Figure S5.** HRMS (ESI) of chlorine radical quenching

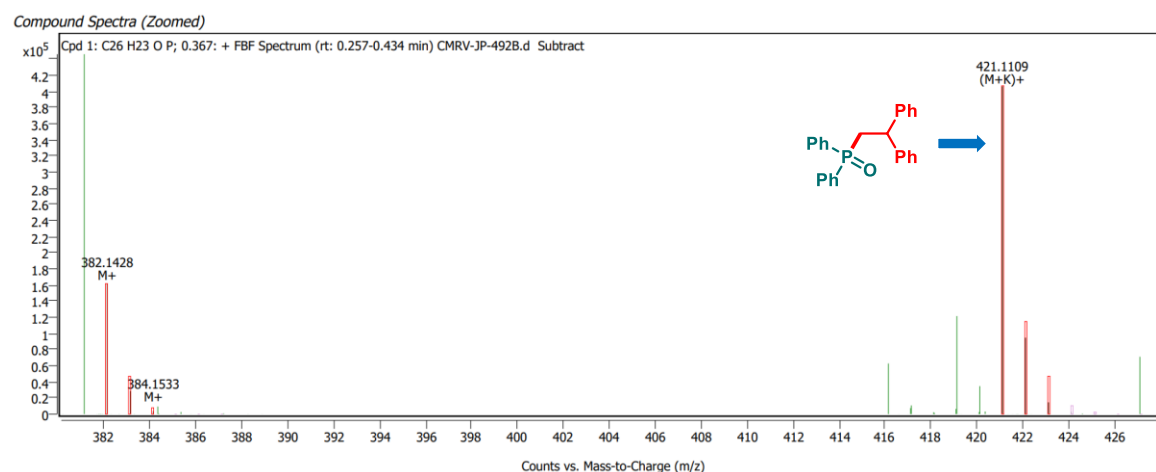

**Figure S6.** HRMS (ESI) of phosphorus radical quenching

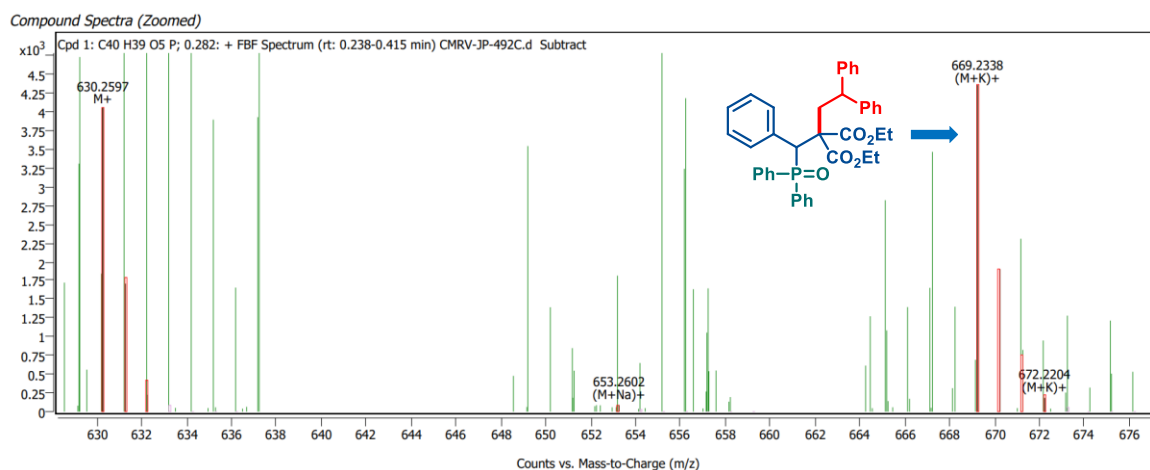

**Figure S7.** HRMS (ESI) of carbon centred radical quenching



### (b) UV-vis experiments

The absorption spectra were measured using a Shimadzu UV 3600i plus spectrophotometer.

For the solutions of Bi(III)Cl<sub>n</sub> complexes in BiCl<sub>3</sub>: TBACl were prepared 1.0×10<sup>-4</sup> mol/L in MeCN (Figure S8).

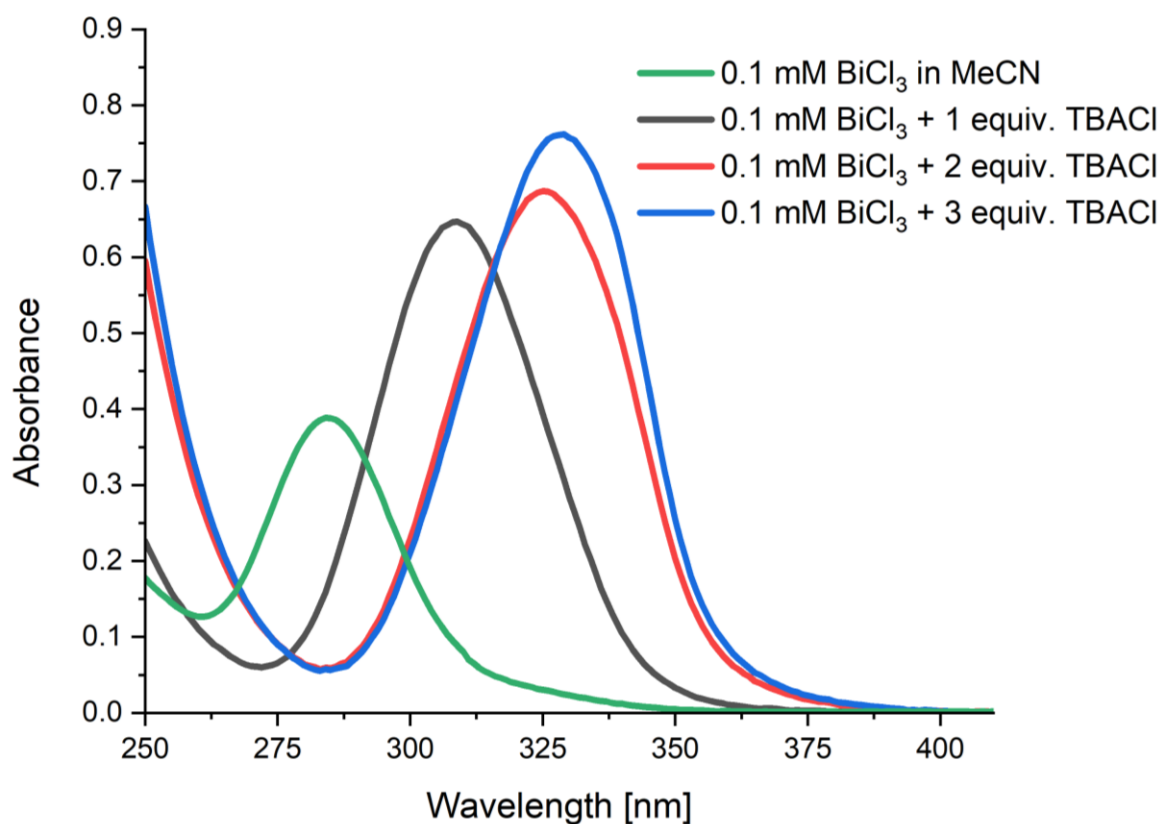

**Figure S8.** UV-vis absorption

### (c) Electron Paramagnetic resonance (EPR) experiment

An 8 mL glass vial equipped with a Teflon-coated stirring bar was charged with substrate BiCl<sub>3</sub> (31mg, 0.1 mmol) and TBACl (56 mg, 0.2 mmol) in glove box. Then 2 mL anhydrous MeCN was added via syringe and flask was stirred for 30 mins in dark, followed by addition of DMPO (14mg, 0.12 mmol) and stirred at room temperature for 5 mins in dark. Then, this reaction was taken out by capillary and was analyzed by EPR at room temperature.

Then the same flask was then irradiated by 390 nm Kessil LED lamps at ambient temperature with a cooling fan for 15 mins. Then, this reaction mixture was taken out by capillary and was analyzed by EPR at room temperature.

Another 8 mL glass vial equipped with a Teflon-coated stirring bar was charged with substrate Diphenylphosphine oxide (20mg, 0.1 mmol),  $\text{BiCl}_3$  (0.003 mmol, 3 mol%) and TBACl (0.006 mmol, 6 mol%) in glove box. Then 2 mL anhydrous MeCN was added via syringe and flask was irradiated by 390 nm Kessil LED lamps at ambient temperature with a cooling fan for 15 mins. Then, this reaction was taken out by capillary and was analyzed by EPR at room temperature.

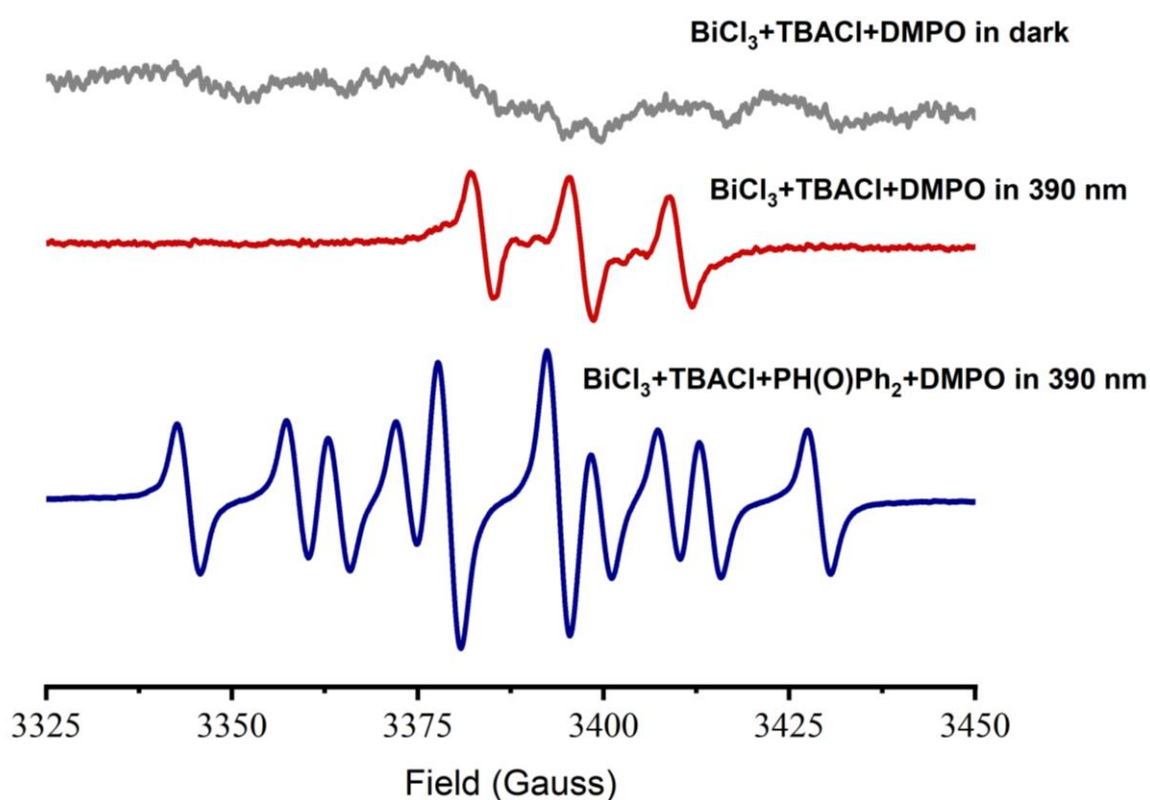

**Figure S9.** EPR spectrum of chlorine and phosphonyl radical

**(d) Light on/off experiment**

An 8 mL glass vial equipped with a Teflon-coated stirring bar was charged with substrate **1a** (0.24 mmol, 1.2 equiv.), substrate **2k** (0.2 mmol, 1.0 equiv.),  $\text{BiCl}_3$  (0.006 mmol, 3 mol%) and TBACl (0.012 mmol, 6 mol%) in glove box. Then 2 mL anhydrous MeCN was added via syringe and flask was irradiated by 390 nm Kessil LED lamps at ambient temperature with a cooling fan. Afterwards, the  $^1\text{H}$  NMR was taken to determine the yield

of **3k** with 1,3,5-trimethoxybenzene as an internal standard. The results shown that when the light was switched off, the reaction hardly carried out. These results demonstrated that the reaction might not undergo a radical-chain process.

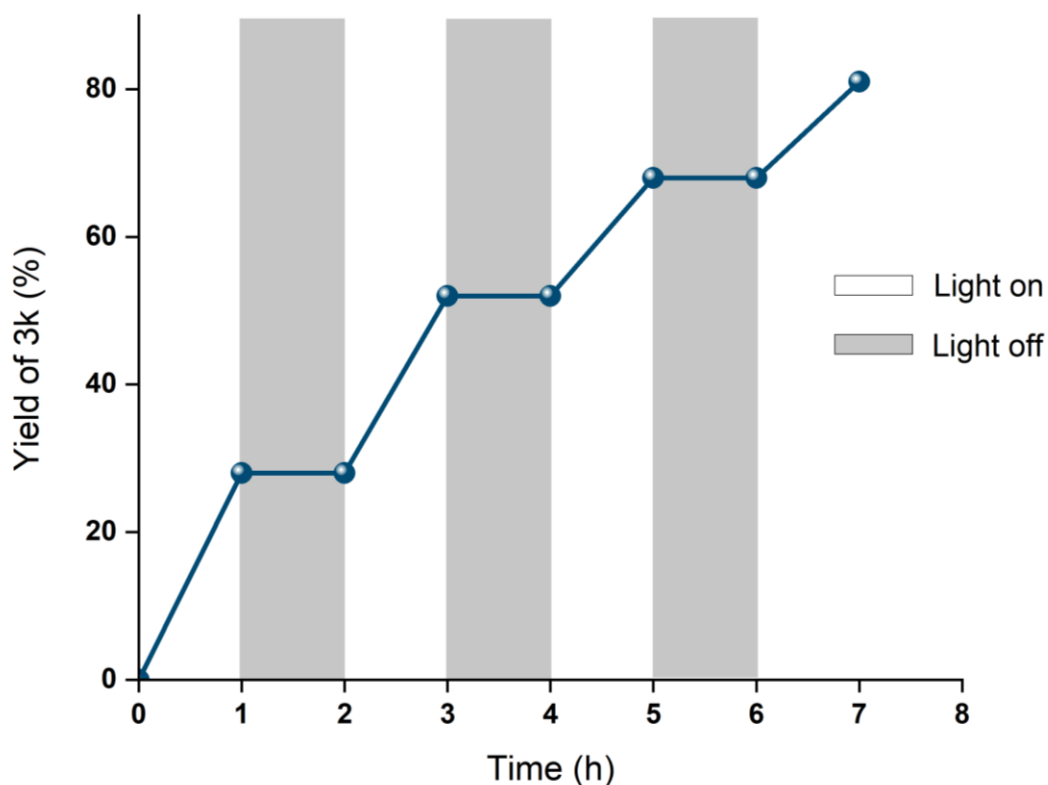

**Figure S10.** Graphical representation of on/off experiment

#### (e) Quantum yield measurement

The photon flux was determined by ferrioxalate actinometry similar to a procedure by Yoon<sup>23</sup>. For this purpose, the following two solutions were prepared:

Solution A:

Potassium ferrioxalate hydrate (737 mg, 1.50 mmol) was dissolved in aq. H<sub>2</sub>SO<sub>4</sub> (0.05 M, 10 mL) to afford a 0.15 M ferrioxalate solution.

Solution B:

1,10-Phenanthroline monohydrate (25 mg, 0.13 mmol), NaOAc (5.63 g, 68.63 mmol) were dissolved in aq. H<sub>2</sub>SO<sub>4</sub> (0.5 M, 25 mL).

Both solutions were stored in dark. First, the photon flux of the 390 nm LED was determined. For this, solution A (2.0 mL) was filled in an 8 mL glass vial and irradiated for 60 s, at  $\lambda_{\text{max}} = 390$  nm. After irradiation, solution B (0.35 mL) was added to the glass vial

and the mixture was stirred in the dark for 1 h to ensure coordination of Fe(II)- ions by phenanthroline. The solution was poured into a quartz cuvette and the absorption of the solution was measured at 510 nm. Sample preparation and measurement were repeated two more times. In a similar way a non-irradiated control sample was prepared, measured for absorbance at 510 nm, which was repeated twice.

The amount of ferrous ion formed was calculated as follows:

$$n(Fe^{+2}) = \frac{V \cdot \Delta A(510nm)}{l \cdot \varepsilon}$$

$V$  refers to the total volume (0.00235 L) of the solution (after addition of solution B),  $\Delta A$  is the difference in absorption of irradiated and non-irradiated samples between at 510 nm,  $l$  is the path length (1.0 cm) of the cuvette, and  $\varepsilon$  is the molar extinction coefficient of the ferrioxalate actinometer at 510 nm ( $11100 \text{ L mol}^{-1} \text{ cm}^{-1}$ )<sup>24</sup>.

The photon flux ( $\Phi_q$ ) was calculated as follows:

$$\phi_q = \frac{n(Fe^{+2})}{\phi_F \cdot t \cdot f}$$

$\Phi_F$  refers to the quantum yield for the ferrioxalate actinometer ( $1.13$  at  $392 \text{ nm}$ )<sup>25</sup>,  $t$  is the irradiation time for solution A (60 s), and  $f$  is the fraction of light absorbed at  $\lambda_{ex} = 390 \text{ nm}$  by the ferrioxalate actinometer. This value is calculated using following equation, where  $A$  is the absorption of the ferrioxalate solution at 390 nm. A measured absorbance value of  $>3$  at 390 nm indicates the fraction of absorbed light to be  $\cong 1$ .

$$f = 1 - 10^{-A}$$

Thus, the average photon flux was calculated to be  $1.11 \times 10^{-8} \text{ Einsteins s}^{-1}$ .

#### Determination of the quantum yield:

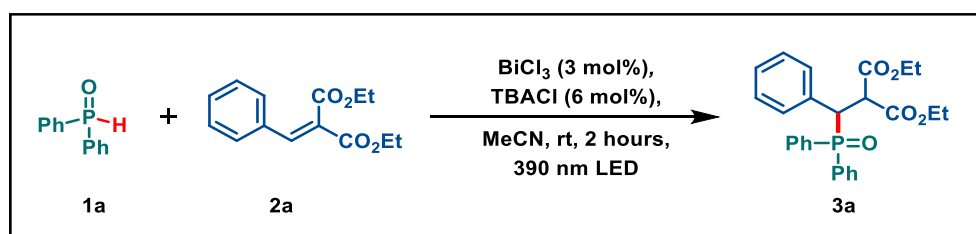

An 8 mL glass vial equipped with a Teflon-coated stirring bar was charged with substrate **1a** (0.12 mmol, 1.2 equiv.), **2a** (0.1 mmol, 1.0 equiv.),  $\text{BiCl}_3$  (0.003 mmol, 3 mol%) and  $\text{TBACl}$  (0.006 mmol, 6 mol%) in glove box. Then 1 mL anhydrous  $\text{MeCN}$  was added via syringe and flask was irradiated by single 390 nm Kessil LED lamp. After 2 hours of

irradiation, the molar number of the product **3a** was determined by using *1,3,5-trimethoxybenzene* as the internal standard. The yield was 56.9% (0.0569 mmol).

The quantum yield ( $\Phi$ ) was calculated as follows:

$$\phi = \frac{n(\text{product})}{\phi_q \cdot t \cdot f_r}$$

where the photon flux ( $\Phi_q$ ) is  $1.11 \times 10^{-8}$  Einsteins  $s^{-1}$  (see above),  $t$  is the reaction time (2 hours = 7200 s) and  $f_r$  is the fraction of light absorbed by the reaction mixture ( $1 - 10^{-A} = 1 - 10^{-0.87205} = 0.8657$ ).

Quantum yield ( $\Phi$ ) was determined to be **0.82**, indicating a closed photocatalytic cycle absence of radical chain propagation pathways.

#### (f) NMR titration experiment

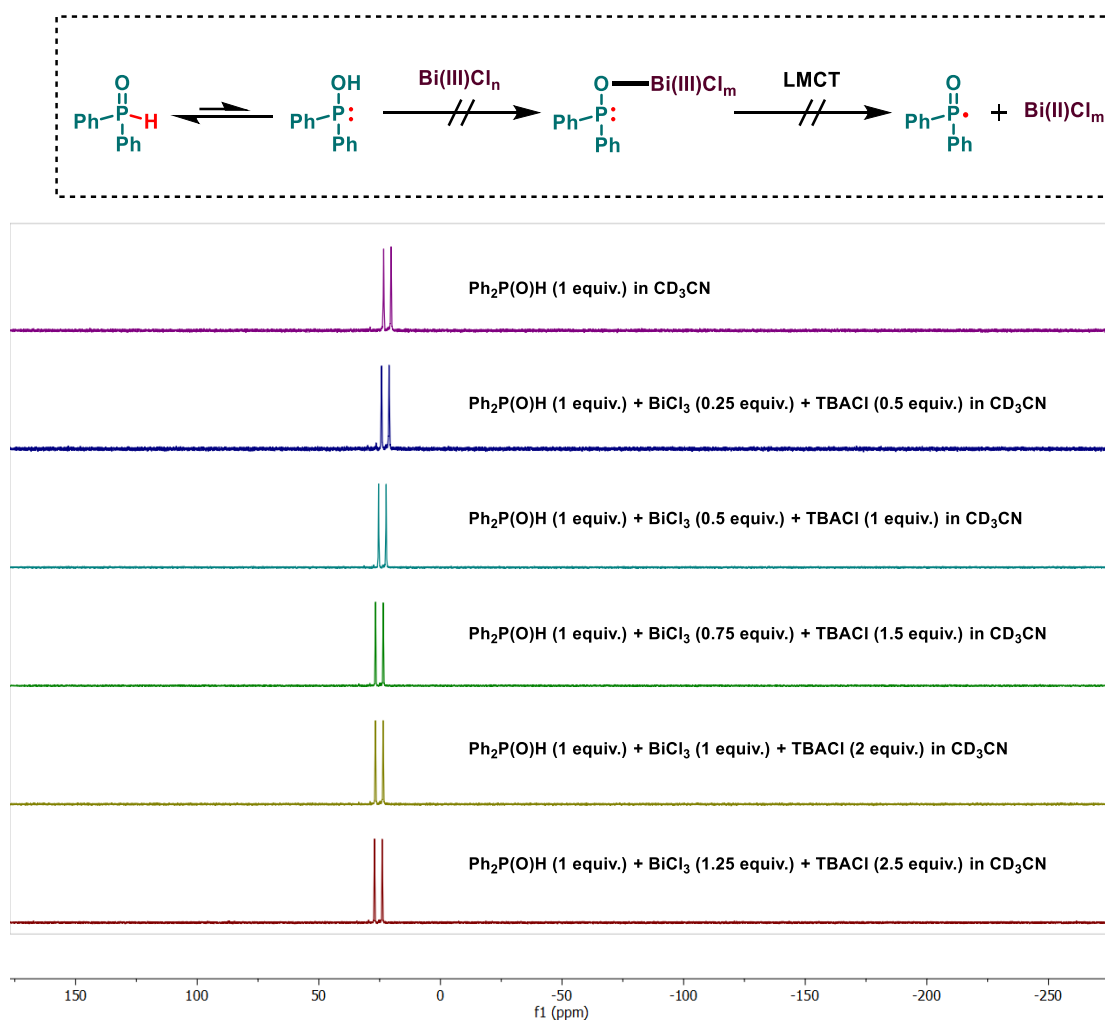

**Figure S11.** NMR titration with loading of catalyst

To ensure that there is no possibility of the formation of a Bi-O-P complex that results in P-radical *via* homolysis of Bi-O bond, NMR titration of the phosphine oxide **1a** was conducted using increasing amounts of BiCl<sub>3</sub> and TBACL. No change in chemical shifts in <sup>31</sup>P- NMR of these mixtures indicated the absence of Bi-O-P complex formation.

## 8. Proposed mechanism

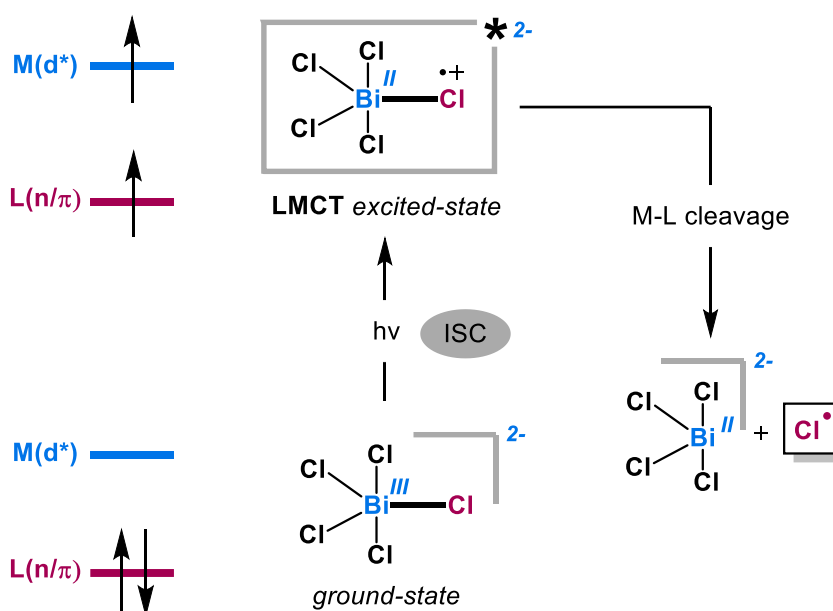

**Figure S12.** The basic process of LMCT states involving BiCl<sub>3</sub>

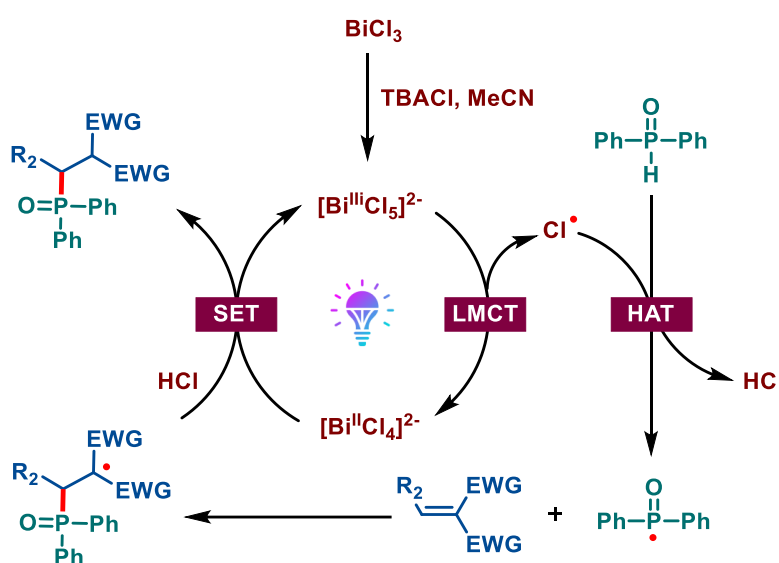

**Scheme S2.** Proposed mechanism for hydrophosphonylation

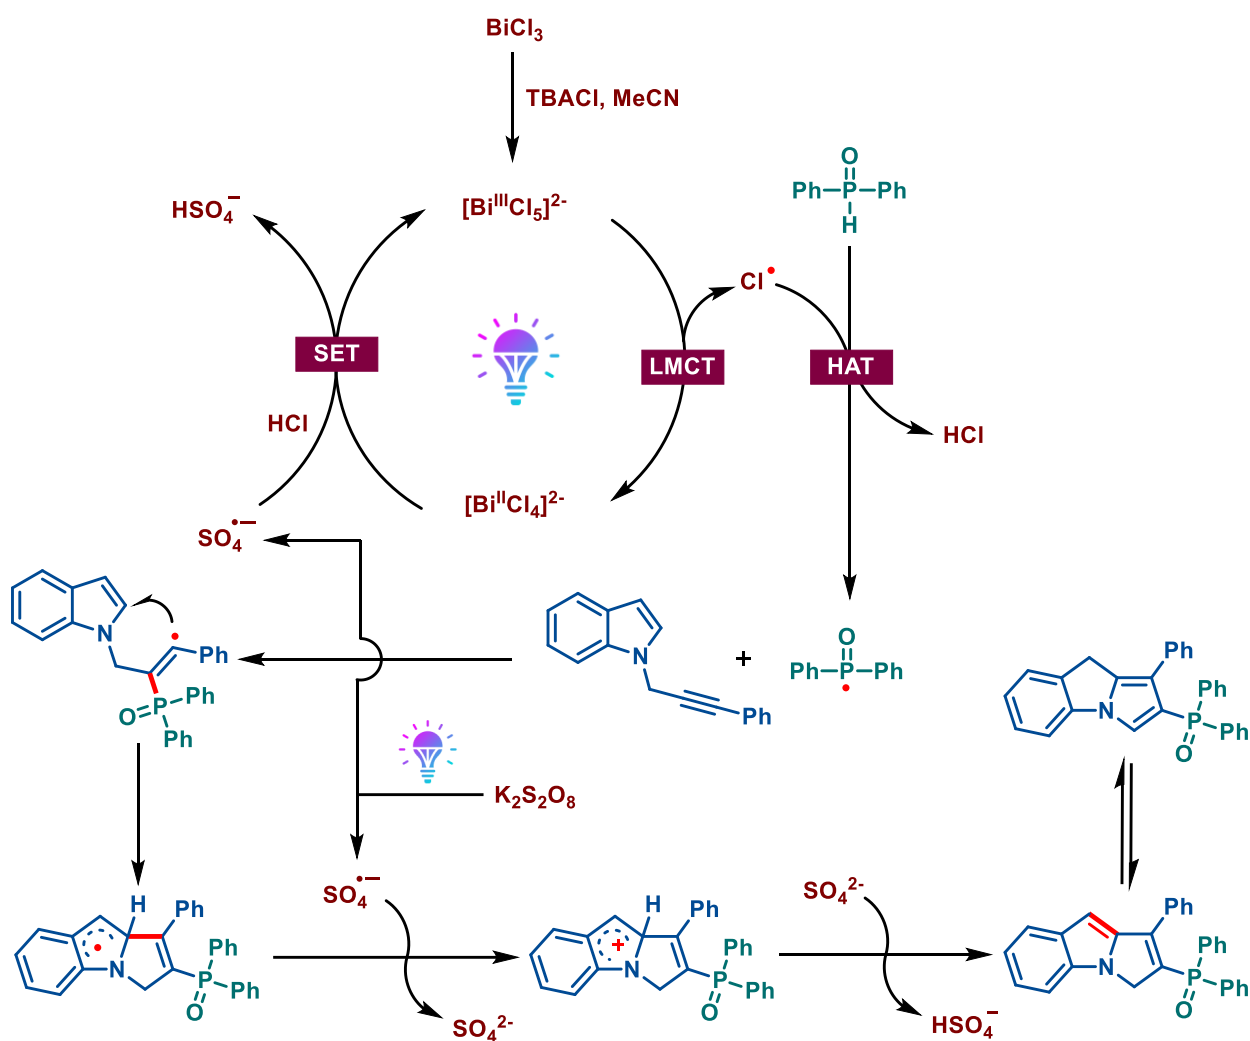

**Scheme S3.** Proposed mechanism for cascade cyclization of 1-(3-phenylprop-2-yn-1-yl)-1H-

indole

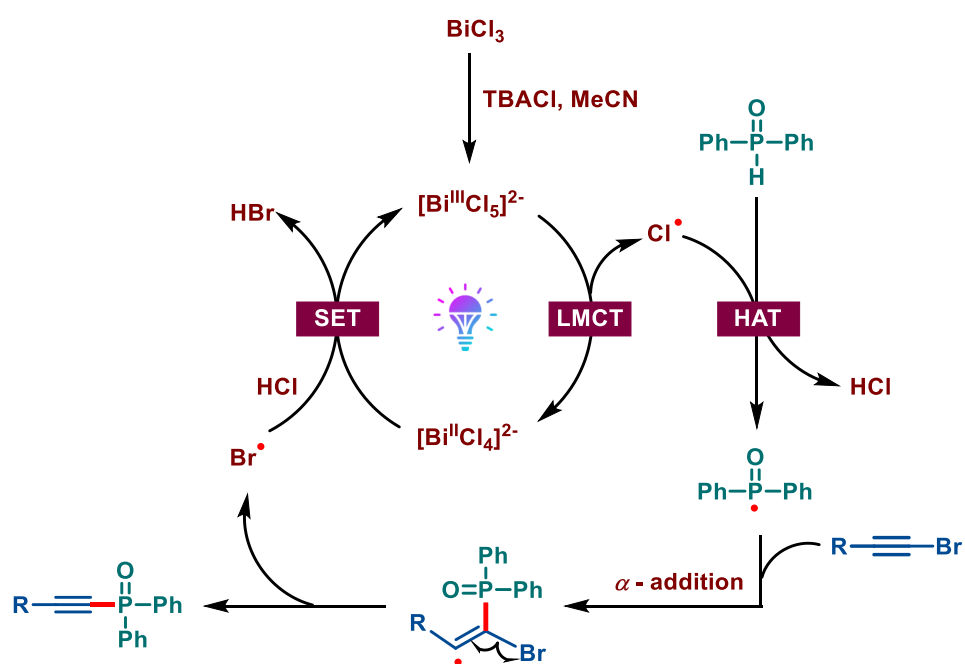

**Scheme S4.** Proposed mechanism for dehalogenative phosphoalkynylation

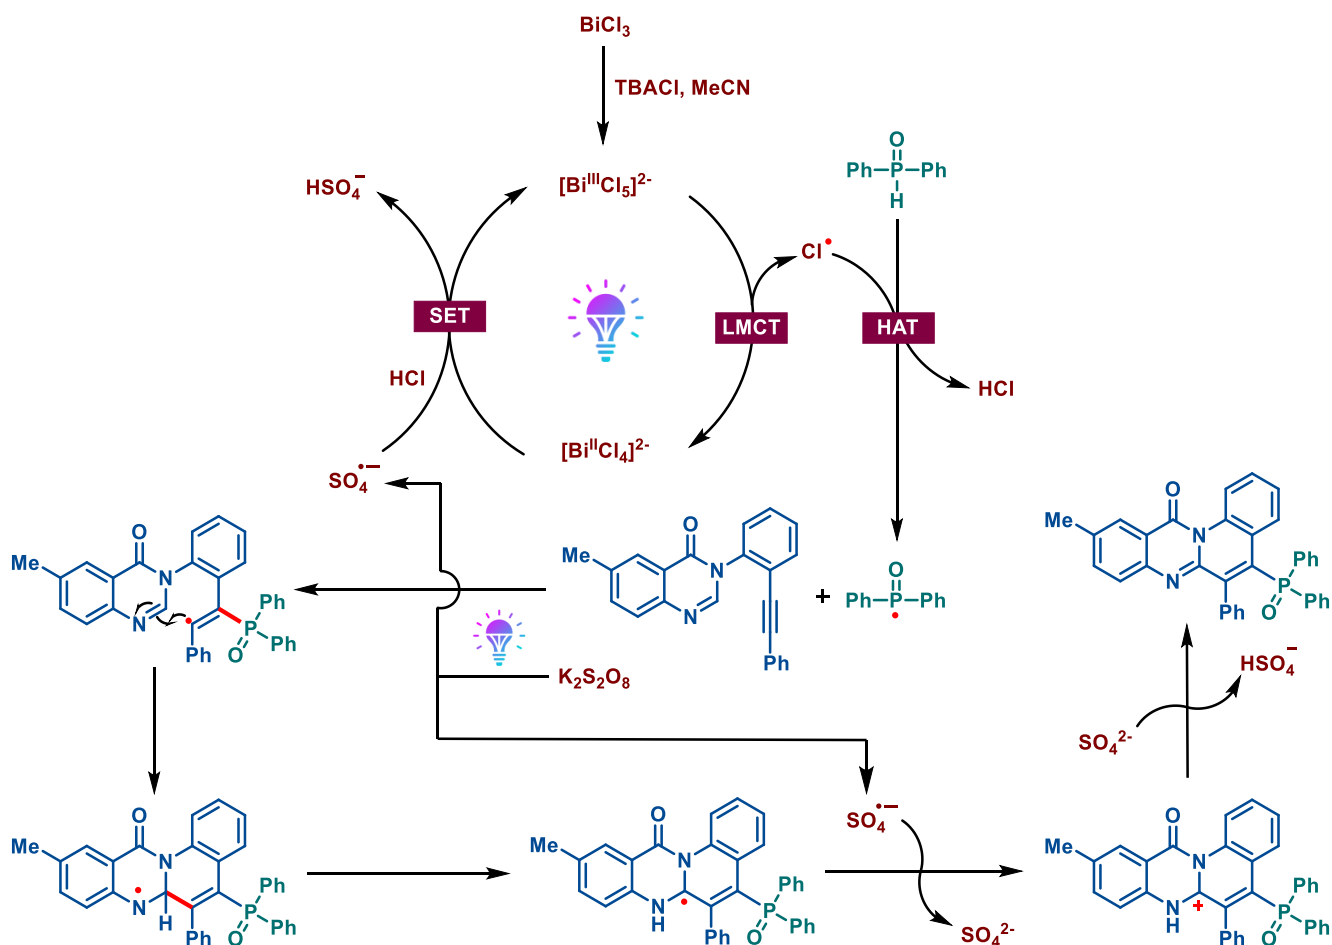

**Scheme S5.** Proposed mechanism for cascade cyclization of 3-(2-(Ethynyl)phenyl)quinazolinones

## 9. Spectroscopic data of final products

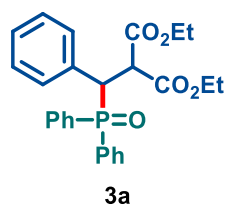

*diethyl-2-((diphenylphosphoryl)(phenyl)methyl)malonate*

**Physical Appearance:** White solid (Mp: 138-140 °C)

**Yield:** 83% (37.3 mg)

**R<sub>f</sub>:** 0.3 (hexane/ethyl acetate, 7:3 v/v)



**<sup>1</sup>H NMR (500 MHz, CDCl<sub>3</sub>)** δ 7.94 (dd, *J* = 12.0, 7.2 Hz, 2H), 7.58 – 7.41 (m, 5H), 7.36 – 7.29 (m, 1H), 7.28 – 7.17 (m, 4H), 7.14 – 7.06 (m, 3H), 4.53 (dd, *J* = 11.2, 6.6 Hz, 1H), 4.45 (t, *J* = 10.8 Hz, 1H), 3.85 – 3.69 (m, 3H), 3.53 (dd, *J* = 10.7, 7.2 Hz, 1H), 1.06 (t, *J* = 7.1 Hz, 3H), 0.84 (t, *J* = 7.1 Hz, 3H).

**<sup>13</sup>C NMR (126 MHz, CDCl<sub>3</sub>)** δ 167.4, 166.9 (d, *J*<sub>*c-p*</sub> = 15.0 Hz), 133.6 (d, *J*<sub>*c-p*</sub> = 5.2 Hz), 132.0 (d, *J*<sub>*c-p*</sub> = 2.8 Hz), 131.9 (d, *J*<sub>*c-p*</sub> = 9.3 Hz), 131.5 (d, *J*<sub>*c-p*</sub> = 2.7 Hz), 131.30 (d, *J*<sub>*c-p*</sub> = 94.8 Hz), 131.27 (d, *J*<sub>*c-p*</sub> = 8.5 Hz), 130.9 (d, *J*<sub>*c-p*</sub> = 102.9 Hz), 130.5 (d, *J*<sub>*c-p*</sub> = 5.3 Hz), 128.4 (d, *J*<sub>*c-p*</sub> = 11.6 Hz), 128.1 (d, *J*<sub>*c-p*</sub> = 3.0 Hz), 128.0 (d, *J*<sub>*c-p*</sub> = 7.1 Hz), 127.4 (d, *J*<sub>*c-p*</sub> = 2.5 Hz), 61.7 (d, *J*<sub>*c-p*</sub> = 28.5 Hz), 52.5, 46.2 (d, *J*<sub>*c-p*</sub> = 65.4 Hz), 13.6 (d, *J*<sub>*c-p*</sub> = 20.4 Hz).

**<sup>31</sup>P NMR (202 MHz, CDCl<sub>3</sub>)** δ 30.47.

**HRMS (ESI-TOF) m/z:** [M + H]<sup>+</sup> Calcd. for C<sub>26</sub>H<sub>28</sub>O<sub>5</sub>P 451.1669; Found 451.1635.

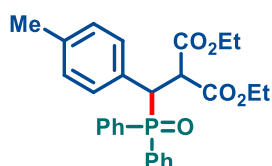

**3b**

*diethyl-2-((diphenylphosphoryl)(p-tolyl)methyl)malonate*

**Physical Appearance:** Light yellow sticky solid

**Yield:** 86% (39.9 mg)

**R<sub>f</sub>:** 0.3 (hexane/ethyl acetate, 7:3 v/v)

**<sup>1</sup>H NMR (400 MHz, CDCl<sub>3</sub>)** δ 7.95 – 7.86 (m, 2H), 7.57 – 7.42 (m, 5H), 7.36 – 7.30 (m, 1H), 7.27 – 7.20 (m, 2H), 7.11 – 7.05 (m, 2H), 6.89 (d, *J* = 7.8 Hz, 2H), 4.50 (dd, *J* = 11.2, 6.8 Hz, 1H), 4.43 – 4.36 (m, 1H), 3.84 – 3.68 (m, 3H), 3.53 (m, 1H), 2.18 (s, 3H), 1.06 (t, *J* = 7.1 Hz, 3H), 0.86 (t, *J* = 7.1 Hz, 3H).

**<sup>13</sup>C NMR (101 MHz, CDCl<sub>3</sub>)** δ 167.6, 167.0 (d, *J*<sub>*c-p*</sub> = 15.1 Hz), 137.1 (d, *J*<sub>*c-p*</sub> = 2.7 Hz), 132.04 (d, *J*<sub>*c-p*</sub> = 14.5 Hz), 131.98 (d, *J*<sub>*c-p*</sub> = 9.0 Hz), 131.5 (d, *J*<sub>*c-p*</sub> = 2.8 Hz), 131.4 (d, *J*<sub>*c-p*</sub> = 8.5 Hz), 131.1 (d, *J*<sub>*c-p*</sub> = 101.5 Hz), 130.8 (d, *J*<sub>*c-p*</sub> = 80.9 Hz), 130.5 (d, *J*<sub>*c-p*</sub> = 5.3 Hz), 130.4, 128.8 (d, *J*<sub>*c-p*</sub> = 2.0 Hz), 128.4 (d, *J*<sub>*c-p*</sub> = 11.6 Hz), 128.1 (d, *J*<sub>*c-p*</sub> = 11.9 Hz), 61.7 (d, *J*<sub>*c-p*</sub> = 22.2 Hz), 52.6, 45.8 (d, *J*<sub>*c-p*</sub> = 65.8 Hz), 21.1, 13.7 (d, *J*<sub>*c-p*</sub> = 14.5 Hz).

**<sup>31</sup>P NMR (162 MHz, CDCl<sub>3</sub>)** δ 30.42.

**HRMS (ESI-TOF) m/z:** [M + K]<sup>+</sup> Calcd. for C<sub>27</sub>H<sub>29</sub>KO<sub>5</sub>P 503.1384; Found 503.1366.

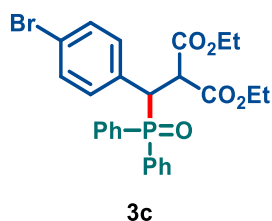

***diethyl-2-((4-bromophenyl)(diphenylphosphoryl)methyl)malonate***

**Physical Appearance:** White sticky solid

**Yield:** 81% (42.7 mg)

**R<sub>f</sub>:** 0.3 (hexane/ethyl acetate, 7:3 v/v)

**<sup>1</sup>H NMR (400 MHz, CDCl<sub>3</sub>)** δ 8.05 – 7.86 (m, 2H), 7.64 – 7.43 (m, 5H), 7.39 – 7.31 (m, 1H), 7.30 – 7.19 (m, 4H), 7.12 (dd, *J* = 8.5, 2.0 Hz, 2H), 4.48 (dd, *J* = 11.0, 6.5 Hz, 1H), 4.38 (t, *J* = 10.7 Hz, 1H), 3.81 (m, 2H), 3.71 (m, 1H), 3.49 (m, 1H), 1.04 (t, *J* = 7.2 Hz, 3H), 0.90 (t, *J* = 7.1 Hz, 3H).

**<sup>13</sup>C NMR (101 MHz, CDCl<sub>3</sub>)** δ 167.3 (d, *J*<sub>c-p</sub> = 1.5 Hz), 166.8 (d, *J*<sub>c-p</sub> = 14.6 Hz), 132.9 (d, *J*<sub>c-p</sub> = 5.3 Hz), 132.3 (d, *J*<sub>c-p</sub> = 5.5 Hz), 132.2 (d, *J*<sub>c-p</sub> = 2.8 Hz), 132.0 (d, *J*<sub>c-p</sub> = 9.2 Hz), 131.8 (d, *J*<sub>c-p</sub> = 2.7 Hz), 131.2, 131.2 (d, *J*<sub>c-p</sub> = 6.3 Hz), 131.1 (d, *J*<sub>c-p</sub> = 95.1 Hz), 130.8 (d, *J*<sub>c-p</sub> = 101.9 Hz), 128.5 (d, *J*<sub>c-p</sub> = 11.8 Hz), 128.3 (d, *J*<sub>c-p</sub> = 11.9 Hz), 121.7 (d, *J*<sub>c-p</sub> = 3.0 Hz), 61.9 (d, *J*<sub>c-p</sub> = 14.6 Hz), 52.3, 45.6 (d, *J*<sub>c-p</sub> = 64.7 Hz), 13.7 (d, *J*<sub>c-p</sub> = 5.9 Hz).

**<sup>31</sup>P NMR (162 MHz, CDCl<sub>3</sub>)** δ 29.79.

**HRMS (ESI-TOF) m/z:** [M + H]<sup>+</sup> Calcd. for C<sub>26</sub>H<sub>25</sub>BrO<sub>5</sub>P 529.0774; Found 529.0772.

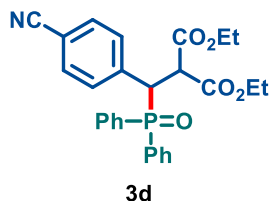

***diethyl-2-((4-cyanophenyl)(diphenylphosphoryl)methyl)malonate***

**Physical Appearance:** Light yellow sticky solid

**Yield:** 86% (40.8 mg)

**R<sub>f</sub>**: 0.35 (hexane/ethyl acetate, 7:3 v/v)

**<sup>1</sup>H NMR (400 MHz, CDCl<sub>3</sub>)** δ 7.99 – 7.90 (m, 2H), 7.61 – 7.42 (m, 5H), 7.43 – 7.33 (m, 5H), 7.32 – 7.23 (m, 2H), 4.56 (dd, *J* = 10.9, 6.3 Hz, 1H), 4.44 (t, *J* = 10.7 Hz, 1H), 3.91 – 3.76 (m, 2H), 3.78 – 3.64 (m, 1H), 3.53 – 3.40 (m, 1H), 1.03 (t, *J* = 7.1 Hz, 3H), 0.90 (t, *J* = 7.1 Hz, 3H).

**<sup>13</sup>C NMR (101 MHz, CDCl<sub>3</sub>)** δ 167.1 (d, *J*<sub>c-p</sub> = 1.7 Hz), 166.7 (d, *J*<sub>c-p</sub> = 14.3 Hz), 139.8 (d, *J*<sub>c-p</sub> = 5.4 Hz), 132.5 (d, *J*<sub>c-p</sub> = 2.9 Hz), 132.1 (d, *J*<sub>c-p</sub> = 2.7 Hz), 132.0 (d, *J*<sub>c-p</sub> = 9.3 Hz), 131.8 (d, *J*<sub>c-p</sub> = 2.0 Hz), 131.3 (d, *J*<sub>c-p</sub> = 5.2 Hz), 131.0 (d, *J*<sub>c-p</sub> = 8.7 Hz), 130.5 (d, *J*<sub>c-p</sub> = 102.1 Hz), 130.5 (d, *J*<sub>c-p</sub> = 96.2 Hz), 128.6 (d, *J*<sub>c-p</sub> = 12.2 Hz), 128.5, 118.6, 111.3 (d, *J*<sub>c-p</sub> = 2.6 Hz), 62.1 (d, *J*<sub>c-p</sub> = 16.5 Hz), 52.1, 46.3 (d, *J*<sub>c-p</sub> = 63.1 Hz), 13.7.

**<sup>31</sup>P NMR (162 MHz, CDCl<sub>3</sub>)** δ 29.67.

**HRMS (ESI-TOF) m/z**: [M + Na]<sup>+</sup> Calcd. for C<sub>27</sub>H<sub>26</sub>NNaO<sub>5</sub>P 498.1441; Found 498.1422.

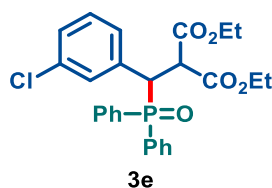

***diethyl-2-((3-chlorophenyl)(diphenylphosphoryl)methyl)malonate***

**Physical Appearance**: Colourless sticky solid

**Yield**: 81% (39.2 mg)

**R<sub>f</sub>**: 0.3 (hexane/ethyl acetate, 7:3 v/v)

**<sup>1</sup>H NMR (400 MHz, CDCl<sub>3</sub>)** δ 7.98 – 7.88 (m, 2H), 7.58 – 7.43 (m, 5H), 7.41 – 7.31 (m, 1H), 7.32 – 7.21 (m, 2H), 7.18 (t, *J* = 1.9 Hz, 1H), 7.18 – 7.10 (m, 1H), 7.10 – 6.96 (m, 2H), 4.49 (dd, *J* = 11.0, 6.6 Hz, 1H), 4.45 – 4.34 (m, 1H), 3.83 (m, 2H), 3.78 – 3.69 (m, 1H), 3.53 (m, 1H), 1.05 (t, *J* = 7.1 Hz, 3H), 0.90 (t, *J* = 7.1 Hz, 3H).

**<sup>13</sup>C NMR (101 MHz, CDCl<sub>3</sub>)** δ 167.3, 166.8 (d, *J*<sub>c-p</sub> = 14.6 Hz), 136.0 (d, *J*<sub>c-p</sub> = 5.2 Hz), 133.9 (d, *J*<sub>c-p</sub> = 2.2 Hz), 132.2 (d, *J*<sub>c-p</sub> = 2.9 Hz), 132.0 (d, *J*<sub>c-p</sub> = 9.2 Hz), 131.8 (d, *J*<sub>c-p</sub> = 2.8 Hz), 131.3 (d, *J*<sub>c-p</sub> = 8.6 Hz), 131.1 (d, *J*<sub>c-p</sub> = 95.4 Hz), 130.78 (d, *J*<sub>c-p</sub> = 5.3 Hz), 130.76 (d, *J*<sub>c-p</sub> = 102.0 Hz), 129.3 (d, *J*<sub>c-p</sub> = 2.0 Hz), 128.7 (d, *J*<sub>c-p</sub> = 5.2 Hz), 128.5 (d, *J*<sub>c-p</sub> = 11.7 Hz), 128.3 (d, *J*<sub>c-p</sub> = 12.0 Hz), 127.7 (d, *J*<sub>c-p</sub> = 2.5 Hz), 62.0 (d, *J*<sub>c-p</sub> = 16.4 Hz), 52.3, 46.0 (d, *J*<sub>c-p</sub> = 64.4 Hz), 13.7 (d, *J*<sub>c-p</sub> = 10.5 Hz).

$^{31}\text{P}$  NMR (162 MHz,  $\text{CDCl}_3$ )  $\delta$  30.04.

HRMS (ESI-TOF)  $m/z$ :  $[\text{M} + \text{H}]^+$  Calcd. for  $\text{C}_{26}\text{H}_{27}\text{ClO}_5\text{P}$  485.1279; Found 485.1271.

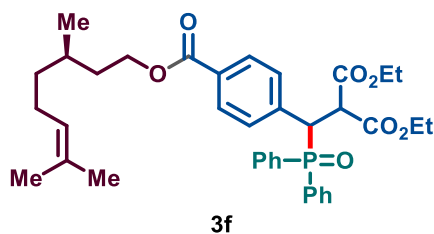

*diethyl-((4-(((3,7-dimethyloct-6-en-1-yl)oxy)carbonyl)phenyl)(diphenylphosphoryl)methyl)malonate* ( $dr = 1:1$ ).

**Physical Appearance:** Colourless sticky solid

**Yield:** 79% (49.9 mg)

**$R_f$ :** 0.3 (hexane/ethyl acetate, 7:3 v/v)

$^1\text{H}$  NMR (500 MHz,  $\text{CDCl}_3$ )  $\delta$  7.99 – 7.89 (m, 2H), 7.77 (d,  $J = 8.5$  Hz, 2H), 7.57 – 7.44 (m, 5H), 7.39 – 7.29 (m, 3H), 7.28 – 7.22 (m, 2H), 5.20 – 4.97 (m, 1H), 4.59 (dd,  $J = 11.1, 6.8$  Hz, 1H), 4.46 (t,  $J = 10.8$  Hz, 1H), 4.36 – 4.22 (m, 2H), 3.87 – 3.69 (m, 3H), 3.52 (m, 1H), 1.99 (m, 2H), 1.82 – 1.70 (m, 2H), 1.67 (s, 3H), 1.59 (s, 3H), 1.53 (m, 1H), 1.43 – 1.33 (m, 1H), 1.24 – 1.18 (m, 1H), 1.06 (t,  $J = 7.1$  Hz, 3H), 0.94 (d,  $J = 6.5$  Hz, 3H), 0.88 (t,  $J = 7.1$  Hz, 3H).

$^{13}\text{C}$  NMR (101 MHz,  $\text{CDCl}_3$ )  $\delta$  167.0 (d,  $J_{c-p} = 43.7$  Hz), 166.4 (d,  $J_{c-p} = 28.5$  Hz), 139.1 (d,  $J_{c-p} = 5.3$  Hz), 132.1 (d,  $J_{c-p} = 2.9$  Hz), 131.9 (d,  $J_{c-p} = 9.2$  Hz), 131.7 (d,  $J_{c-p} = 2.6$  Hz), 131.4 (d,  $J_{c-p} = 2.7$  Hz), 131.1 (d,  $J_{c-p} = 8.7$  Hz), 130.49 (d,  $J_{c-p} = 5.2$  Hz), 130.48, 130.1, 129.4 (d,  $J_{c-p} = 2.5$  Hz), 129.2, 129.1, 128.4 (d,  $J_{c-p} = 11.8$  Hz), 128.2 (d,  $J_{c-p} = 11.9$  Hz), 124.5, 63.6, 61.8 (d,  $J_{c-p} = 18.7$  Hz), 52.3, 46.2 (d,  $J_{c-p} = 63.8$  Hz), 37.0, 35.4, 29.5, 25.7, 25.4, 19.5, 17.7, 13.7, 13.6.

$^{31}\text{P}$  NMR (202 MHz,  $\text{CDCl}_3$ )  $\delta$  29.78.

HRMS (ESI-TOF)  $m/z$ :  $[\text{M} + \text{H}]^+$  Calcd. for  $\text{C}_{37}\text{H}_{46}\text{O}_7\text{P}$  633.2976; Found 633.2968.

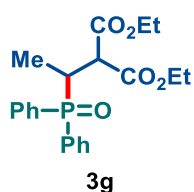

***diethyl-2-(1-(diphenylphosphoryl)ethyl)malonate***

**Physical Appearance:** White solid (Mp: 110-113 °C)

**Yield:** 68% (26.4 mg)

**R<sub>f</sub>:** 0.3 (hexane/ethyl acetate, 7:3 v/v)

**<sup>1</sup>H NMR (400 MHz, CDCl<sub>3</sub>)** δ 7.87 – 7.72 (m, 4H), 7.59 – 7.36 (m, 6H), 4.20 – 4.03 (m, 2H), 4.00 – 3.84 (m, 1H), 3.84 – 3.70 (m, 2H), 3.40 – 3.24 (m, 1H), 1.33 – 1.12 (m, 6H), 1.14 – 1.04 (m, 3H).

**<sup>13</sup>C NMR (101 MHz, CDCl<sub>3</sub>)** δ 168.1 (d, *J*<sub>c-p</sub> = 9.3 Hz), 167.6 (d, *J*<sub>c-p</sub> = 9.1 Hz), 131.99 (d, *J*<sub>c-p</sub> = 5.9 Hz), 131.98, 131.45 (d, *J*<sub>c-p</sub> = 9.3 Hz), 131.39 (d, *J*<sub>c-p</sub> = 96.2 Hz), 131.3 (d, *J*<sub>c-p</sub> = 8.5 Hz), 131.0 (d, *J*<sub>c-p</sub> = 97.9 Hz), 128.7 (d, *J*<sub>c-p</sub> = 11.6 Hz), 128.6 (d, *J*<sub>c-p</sub> = 11.5 Hz), 61.7 (d, *J*<sub>c-p</sub> = 15.2 Hz), 50.6, 32.7 (d, *J*<sub>c-p</sub> = 71.2 Hz), 13.9 (d, *J*<sub>c-p</sub> = 17.4 Hz), 11.0 (d, *J*<sub>c-p</sub> = 2.2 Hz).

**<sup>31</sup>P NMR (162 MHz, CDCl<sub>3</sub>)** δ 34.43.

**HRMS (ESI-TOF) m/z:** [M + Na]<sup>+</sup> Calcd. for C<sub>21</sub>H<sub>25</sub>NaO<sub>5</sub>P 411.1332; Found 411.1319.

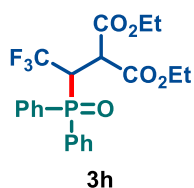

***diethyl-2-(1-(diphenylphosphoryl)-2,2,2-trifluoroethyl)malonate***

**Physical Appearance:** Light yellow oil

**Yield:** 81% (35.8 mg)

**R<sub>f</sub>:** 0.3 (hexane/ethyl acetate, 7:3 v/v)

**<sup>1</sup>H NMR (500 MHz, CDCl<sub>3</sub>)** δ 7.90 – 7.79 (m, 4H), 7.62 – 7.55 (m, 1H), 7.57 – 7.50 (m, 3H), 7.51 – 7.44 (m, 2H), 4.35 (m, 1H), 4.18 (q, *J* = 7.2 Hz, 2H), 4.14 – 4.01 (m, 3H), 1.23 (t, *J* = 7.1 Hz, 3H), 1.16 (td, *J* = 7.2, 1.1 Hz, 3H).

**<sup>13</sup>C NMR (126 MHz, CDCl<sub>3</sub>)** δ 166.7 (d, *J*<sub>c-p</sub> = 5.0 Hz), 166.4 (d, *J*<sub>c-p</sub> = 8.8 Hz), 132.6 (d, *J*<sub>c-p</sub> = 3.0 Hz), 132.3 (d, *J*<sub>c-p</sub> = 10.0 Hz), 131.3, 131.2, 130.5, 129.8 (d, *J*<sub>c-p</sub> = 102.1 Hz), 128.9 (d, *J*<sub>c-p</sub> = 12.4 Hz), 128.4 (d, *J*<sub>c-p</sub> = 12.7 Hz), 124.6 (q, *J* = 280.4 Hz), 62.4 (d, *J*<sub>c-p</sub> = 12.9 Hz), 48.7, 46.3 (dd, *J* = 60.2, 27.2 Hz), 13.7 (d, *J*<sub>c-p</sub> = 3.3 Hz).

$^{19}\text{F}$  NMR (377 MHz,  $\text{CDCl}_3$ )  $\delta$  -56.38.

$^{31}\text{P}$  NMR (162 MHz,  $\text{CDCl}_3$ )  $\delta$  26.79.

HRMS (ESI-TOF)  $m/z$ :  $[\text{M} + \text{Na}]^+$  Calcd. for  $\text{C}_{21}\text{H}_{22}\text{F}_3\text{NaO}_5\text{P}$  465.1049; Found 465.1049.

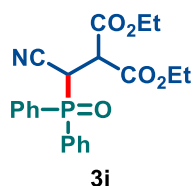

*diethyl-2-(cyano(diphenylphosphoryl)methyl)malonate*

**Physical Appearance:** Colourless liquid

**Yield:** 89% (35.5 mg)

**$R_f$ :** 0.3 (hexane/ethyl acetate, 7:3 v/v)

$^1\text{H}$  NMR (400 MHz,  $\text{CDCl}_3$ )  $\delta$  8.03 – 7.95 (m, 2H), 7.93 – 7.85 (m, 2H), 7.68 – 7.58 (m, 2H), 7.62 – 7.48 (m, 4H), 4.32 (dd,  $J = 16.4, 6.6$  Hz, 1H), 4.25 – 4.14 (m, 2H), 4.14 – 3.88 (m, 3H), 1.24 (t,  $J = 7.1$  Hz, 3H), 1.15 (t,  $J = 7.3$  Hz, 3H).

$^{13}\text{C}$  NMR (101 MHz,  $\text{CDCl}_3$ )  $\delta$  165.9 (d,  $J_{c-p} = 7.3$  Hz), 165.4 (d,  $J_{c-p} = 6.5$  Hz), 133.42, 133.41 (d,  $J_{c-p} = 6.0$  Hz), 132.5 (d,  $J_{c-p} = 9.3$  Hz), 131.3 (d,  $J_{c-p} = 9.8$  Hz), 129.6 (d,  $J_{c-p} = 105.5$  Hz), 129.2 (d,  $J_{c-p} = 12.6$  Hz), 128.8 (d,  $J_{c-p} = 12.6$  Hz), 127.4 (d,  $J_{c-p} = 103.1$  Hz), 115.3 (d,  $J_{c-p} = 3.3$  Hz), 62.8 (d,  $J_{c-p} = 45.3$  Hz), 48.4, 32.8 (d,  $J_{c-p} = 60.8$  Hz), 13.8 (d,  $J_{c-p} = 15.7$  Hz).

$^{31}\text{P}$  NMR (162 MHz,  $\text{CDCl}_3$ )  $\delta$  25.81.

HRMS (ESI-TOF)  $m/z$ :  $[\text{M} + \text{Na}]^+$  Calcd. for  $\text{C}_{21}\text{H}_{22}\text{NNaO}_5\text{P}$  422.1128; Found 422.1117.

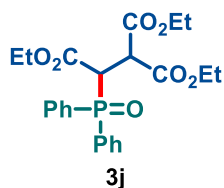

*triethyl-2-(diphenylphosphoryl)ethane-1,1,2-tricarboxylate*

**Physical Appearance:** Colourless liquid

**Yield:** 89% (35.2 mg)

**$R_f$ :** 0.3 (hexane/ethyl acetate, 7:3 v/v)

**<sup>1</sup>H NMR (500 MHz, CDCl<sub>3</sub>)** δ 8.00 – 7.91 (m, 2H), 7.71 (m, 2H), 7.56 m, 1H), 7.50 (m, 3H), 7.41 (m, 2H), 4.51 (dd, *J* = 13.3, 11.6 Hz, 1H), 4.30 (dd, *J* = 11.6, 7.6 Hz, 1H), 4.12 (m, 2H), 3.96 (m, 2H), 3.69 (m, 1H), 3.59 (m, 1H), 1.19 (t, *J* = 7.1 Hz, 3H), 1.10 (t, *J* = 7.2 Hz, 3H), 0.87 (t, *J* = 7.2 Hz, 3H).

**<sup>13</sup>C NMR (126 MHz, CDCl<sub>3</sub>)** δ 168.1 (d, *J*<sub>c-p</sub> = 2.8 Hz), 167.7 (d, *J*<sub>c-p</sub> = 14.4 Hz), 166.7, 132.4 (d, *J*<sub>c-p</sub> = 2.9 Hz), 132.4 (d, *J*<sub>c-p</sub> = 2.8 Hz), 131.9 (d, *J*<sub>c-p</sub> = 9.5 Hz), 131.5 (d, *J*<sub>c-p</sub> = 9.6 Hz), 131.3 (d, *J*<sub>c-p</sub> = 103.7 Hz), 130.4 (d, *J*<sub>c-p</sub> = 101.2 Hz), 128.6 (d, *J*<sub>c-p</sub> = 12.6 Hz), 128.3 (d, *J*<sub>c-p</sub> = 12.2 Hz), 62.2, 62.1, 61.6, 50.5, 48.8 (d, *J*<sub>c-p</sub> = 56.0 Hz), 14.0, 13.7, 13.5.

**<sup>31</sup>P NMR (202 MHz, CDCl<sub>3</sub>)** δ 28.09.

**HRMS (ESI-TOF) m/z:** [M + Na]<sup>+</sup> Calcd. for C<sub>23</sub>H<sub>27</sub>NaO<sub>7</sub>P 469.1387; Found 469.1377.

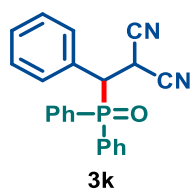

### *2-((diphenylphosphoryl)(phenyl)methyl)malononitrile*

**Physical Appearance:** White solid (Mp: 131-134 °C)

**Yield:** 88% (31.3 mg)

**R<sub>f</sub>:** 0.3 (hexane/ethyl acetate, 7:3 v/v)

**<sup>1</sup>H NMR (400 MHz, CDCl<sub>3</sub>)** δ 8.03 – 7.93 (m, 2H), 7.71 – 7.63 (m, 1H), 7.62 – 7.55 (m, 2H), 7.55 – 7.44 (m, 2H), 7.43 – 7.33 (m, 3H), 7.33 – 7.22 (m, 5H), 4.74 (t, *J* = 7.6 Hz, 1H), 4.06 (t, *J* = 7.7 Hz, 1H).

**<sup>13</sup>C NMR (101 MHz, CDCl<sub>3</sub>)** δ 133.3 (d, *J*<sub>c-p</sub> = 2.9 Hz), 132.5 (d, *J*<sub>c-p</sub> = 3.0 Hz), 131.38, 131.36 (d, *J*<sub>c-p</sub> = 17.5 Hz), 130.9 (d, *J*<sub>c-p</sub> = 4.1 Hz), 130.47, 129.8 (d, *J*<sub>c-p</sub> = 5.2 Hz), 129.44, 129.42 (d, *J*<sub>c-p</sub> = 9.1 Hz), 129.36, 128.8, 128.5 (d, *J*<sub>c-p</sub> = 12.4 Hz), 111.5, 111.4 (d, *J*<sub>c-p</sub> = 4.9 Hz), 47.09 (d, *J*<sub>c-p</sub> = 63.4 Hz), 24.9 (d, *J*<sub>c-p</sub> = 1.7 Hz).

**<sup>31</sup>P NMR (162 MHz, CDCl<sub>3</sub>)** δ 28.68.

**HRMS (ESI-TOF) m/z:** [M + H]<sup>+</sup> Calcd. for C<sub>22</sub>H<sub>18</sub>N<sub>2</sub>OP 357.1151; Found 357.1135.

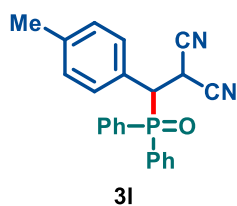

**2-((diphenylphosphoryl)(p-tolyl)methyl)malononitrile**

**Physical Appearance:** White sticky solid

**Yield:** 86% (31.8 mg)

**R<sub>f</sub>:** 0.3 (hexane/ethyl acetate, 7:3 v/v)

**<sup>1</sup>H NMR (400 MHz, CDCl<sub>3</sub>)** δ 7.98 – 7.89 (m, 2H), 7.62 – 7.44 (m, 6H), 7.37 (t, *J* = 7.5 Hz, 1H), 7.25 (d, *J* = 8.8 Hz, 3H), 7.04 (d, *J* = 8.0 Hz, 2H), 4.68 (t, *J* = 7.4 Hz, 1H), 4.03 (t, *J* = 7.8 Hz, 1H), 2.24 (s, 3H).

**<sup>13</sup>C NMR (101 MHz, CDCl<sub>3</sub>)** δ 139.4, 133.7, 133.2, 132.4 (d, *J*<sub>c-p</sub> = 2.8 Hz), 132.3 (d, *J*<sub>c-p</sub> = 10.2 Hz), 131.4 (d, *J*<sub>c-p</sub> = 9.1 Hz), 130.3 (d, *J*<sub>c-p</sub> = 72.8 Hz), 130.0, 129.7 (d, *J*<sub>c-p</sub> = 5.2 Hz), 129.3 (d, *J*<sub>c-p</sub> = 11.7 Hz), 129.2 (d, *J*<sub>c-p</sub> = 13.0 Hz), 128.6 (d, *J*<sub>c-p</sub> = 66.5 Hz), 128.5 (d, *J*<sub>c-p</sub> = 12.4 Hz), 127.7 (d, *J*<sub>c-p</sub> = 4.3 Hz), 111.5 (d, *J*<sub>c-p</sub> = 9.3 Hz), 111.4, 46.7 (d, *J*<sub>c-p</sub> = 64.1 Hz), 25.0, 21.2.

**<sup>31</sup>P NMR (162 MHz, CDCl<sub>3</sub>)** δ 28.58.

**HRMS (ESI-TOF) m/z:** [M + H]<sup>+</sup> Calcd. for C<sub>23</sub>H<sub>20</sub>N<sub>2</sub>OP 371.1308; Found 371.1312.

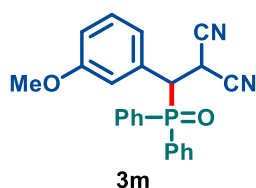

**2-((diphenylphosphoryl)(3-methoxyphenyl)methyl)malononitrile**

**Physical Appearance:** White solid (Mp: 138-141 °C)

**Yield:** 83% (32.0 mg)

**R<sub>f</sub>:** 0.3 (hexane/ethyl acetate, 7:3 v/v)

**<sup>1</sup>H NMR (400 MHz, CDCl<sub>3</sub>)** δ 7.97 (dd, *J* = 10.0, 8.2 Hz, 2H), 7.74 – 7.44 (m, 5H), 7.38 (t, *J* = 6.7 Hz, 1H), 7.28 (dd, *J* = 7.9, 3.4 Hz, 1H), 7.17 (t, *J* = 8.0 Hz, 1H), 6.97 (d, *J* = 6.8 Hz, 1H),



6.93 (s, 1H), 6.80 (d,  $J = 8.4$  Hz, 1H), 4.77 (t,  $J = 7.5$  Hz, 1H), 4.09 (t,  $J = 7.8$  Hz, 1H), 3.66 (s, 3H).

$^{13}\text{C}$  NMR (101 MHz,  $\text{CDCl}_3$ )  $\delta$  159.9, 132.4 (d,  $J_{c-p} = 2.8$  Hz), 132.19 (d,  $J_{c-p} = 13.8$  Hz), 132.16, 131.4 (d,  $J_{c-p} = 1.7$  Hz), 131.3 (d,  $J_{c-p} = 1.6$  Hz), 130.3, 130.0 (d,  $J_{c-p} = 97.8$  Hz), 129.30 (d,  $J_{c-p} = 11.9$  Hz), 129.28 (d,  $J_{c-p} = 104.5$  Hz), 129.1 (d,  $J_{c-p} = 12.7$  Hz), 128.4 (d,  $J_{c-p} = 12.4$  Hz), 122.1 (d,  $J_{c-p} = 5.5$  Hz), 115.4 (d,  $J_{c-p} = 2.0$  Hz), 114.9 (d,  $J_{c-p} = 5.1$  Hz), 111.5 (d,  $J_{c-p} = 8.5$  Hz), 55.3, 46.8 (d,  $J_{c-p} = 63.4$  Hz), 24.8 (d,  $J_{c-p} = 1.7$  Hz).

$^{31}\text{P}$  NMR (162 MHz,  $\text{CDCl}_3$ )  $\delta$  28.70.

HRMS (ESI-TOF)  $m/z$ :  $[\text{M} + \text{Na}]^+$  Calcd. for  $\text{C}_{23}\text{H}_{19}\text{N}_2\text{NaO}_2\text{P}$  409.1076; Found 409.1066.

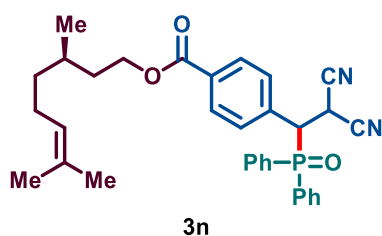

*3,7-dimethyloct-6-en-1-yl 4-(2,2-dicyano-1-(diphenylphosphoryl)ethyl)benzoate (dr = 1:1).*

**Physical Appearance:** White sticky solid

**Yield:** 76% (40.9 mg)

**$R_f$ :** 0.3 (hexane/ethyl acetate, 7:3 v/v)

$^1\text{H}$  NMR (400 MHz,  $\text{CDCl}_3$ )  $\delta$  8.01 (m, 2H), 7.95 (d,  $J = 8.4$  Hz, 2H), 7.71 – 7.65 (m, 1H), 7.65 – 7.58 (m, 2H), 7.58 – 7.50 (m, 4H), 7.47 – 7.36 (m, 1H), 7.30 (m, 2H), 5.11 (m, 1H), 4.78 (t,  $J = 7.5$  Hz, 1H), 4.34 (m, 2H), 4.20 (t,  $J = 7.6$  Hz, 1H), 2.12 – 1.92 (m, 2H), 1.87 – 1.74 (m, 1H), 1.68 (s, 3H), 1.64 (m, 1H), 1.61 (s, 3H), 1.57 (m, 1H), 1.40 (m, 1H), 1.32 – 1.17 (m, 1H), 0.97 (d,  $J = 6.5$  Hz, 3H).

$^{13}\text{C}$  NMR (101 MHz,  $\text{CDCl}_3$ )  $\delta$  165.9, 135.8 (d,  $J_{c-p} = 4.1$  Hz), 133.5 (d,  $J_{c-p} = 2.9$  Hz), 132.7 (d,  $J_{c-p} = 2.9$  Hz), 131.5, 131.39 (d,  $J_{c-p} = 1.7$  Hz), 131.38 (d,  $J_{c-p} = 9.2$  Hz), 131.2 (d,  $J_{c-p} = 9.2$  Hz), 130.4, 129.9 (d,  $J_{c-p} = 5.1$  Hz), 129.51 (d,  $J_{c-p} = 12.0$  Hz), 129.50 (d,  $J_{c-p} = 98.4$  Hz), 128.8 (d,  $J_{c-p} = 90.3$  Hz), 128.7 (d,  $J_{c-p} = 12.4$  Hz), 124.6, 111.2 (d,  $J_{c-p} = 8.7$  Hz), 63.9, 46.8 (d,  $J_{c-p} = 62.2$  Hz), 37.0, 35.5, 25.8, 25.4, 24.7, 19.6, 17.8.

$^{31}\text{P}$  NMR (162 MHz,  $\text{CDCl}_3$ )  $\delta$  28.49.

HRMS (ESI-TOF)  $m/z$ :  $[\text{M} + \text{H}]^+$  Calcd. for  $\text{C}_{33}\text{H}_{36}\text{N}_2\text{O}_3\text{P}$  539.2458; Found 539.2455.

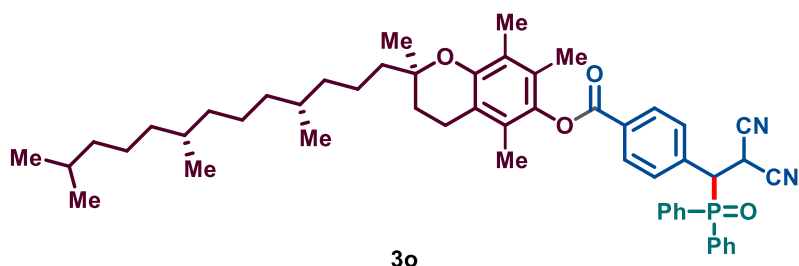

**2,5,7,8-tetramethyl-2-((4*R*,8*R*)-4,8,12-trimethyltridecyl)chroman-6-yl-4-(2,2-dicyano-1-(diphenylphosphoryl)ethyl)benzoate (*dr* = 1:1).**

**Physical Appearance:** White sticky solid

**Yield:** 78% (63.3 mg)

***R*<sub>f</sub>:** 0.25 (hexane/ethyl acetate, 7:3 v/v)

**<sup>1</sup>H NMR (500 MHz, CDCl<sub>3</sub>)** δ 8.16 (d, *J* = 8.2 Hz, 1H), 8.07 – 8.00 (m, 1H), 7.71 (td, *J* = 7.4, 1.5 Hz, 1H), 7.66 (dt, *J* = 7.0, 4.3 Hz, 1H), 7.62 – 7.53 (m, 2H), 7.46 (td, *J* = 7.5, 1.5 Hz, 1H), 7.35 (td, *J* = 7.7, 3.2 Hz, 1H), 4.81 (t, *J* = 7.4 Hz, 1H), 4.21 (t, *J* = 7.5 Hz, 1H), 2.64 (t, *J* = 6.8 Hz, 2H), 2.14 (s, 3H), 2.05 (s, 3H), 2.01 (s, 3H), 1.91 – 1.76 (m, 2H), 1.65 – 1.50 (m, 3H), 1.46 – 1.32 (m, 6H), 1.29 (m, 7H), 1.22 – 1.03 (m, 7H), 0.89 (m, 13H).

**<sup>13</sup>C NMR (126 MHz, CDCl<sub>3</sub>)** δ 164.4, 149.6, 140.5, 136.3 (d, *J*<sub>*c-p*</sub> = 4.1 Hz), 133.5 (d, *J*<sub>*c-p*</sub> = 2.9 Hz), 132.7 (d, *J*<sub>*c-p*</sub> = 3.0 Hz), 131.3 (d, *J*<sub>*c-p*</sub> = 9.1 Hz), 131.2 (d, *J*<sub>*c-p*</sub> = 9.2 Hz), 130.9, 130.5, 130.1 (d, *J*<sub>*c-p*</sub> = 5.0 Hz), 129.5 (d, *J*<sub>*c-p*</sub> = 12.1 Hz), 129.4 (d, *J*<sub>*c-p*</sub> = 98.4 Hz), 128.9 (d, *J*<sub>*c-p*</sub> = 105.1 Hz), 128.7 (d, *J*<sub>*c-p*</sub> = 12.4 Hz), 126.8, 125.0, 123.2, 117.6, 111.1 (d, *J*<sub>*c-p*</sub> = 4.2 Hz), 111.0 (d, *J*<sub>*c-p*</sub> = 4.9 Hz), 75.2, 47.0 (d, *J*<sub>*c-p*</sub> = 61.6 Hz), 39.4, 37.5, 37.4, 37.3, 32.81, 32.80, 28.0, 24.84, 24.82, 24.6, 24.5, 22.8, 22.6, 21.1, 20.6, 19.8, 19.72, 19.69, 19.66, 19.6, 13.1, 12.3, 11.9.

**<sup>31</sup>P NMR (202 MHz, CDCl<sub>3</sub>)** δ 28.44.

**HRMS (ESI-TOF) *m/z*:** [M + Na]<sup>+</sup> Calcd. for C<sub>52</sub>H<sub>65</sub>N<sub>2</sub>NaO<sub>4</sub>P 835.4574; Found 835.4542.

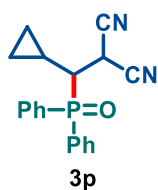

**2-(cyclopropyl(diphenylphosphoryl)methyl)malononitrile**

**Physical Appearance:** White sticky solid

**Yield:** 91% (29.1 mg)

**R<sub>f</sub>:** 0.3 (hexane/ethyl acetate, 7:3 v/v)

**<sup>1</sup>H NMR (500 MHz, CDCl<sub>3</sub>)** δ 7.97 – 7.88 (m, 2H), 7.87 – 7.78 (m, 2H), 7.68 – 7.60 (m, 2H), 7.55 (m, 4H), 4.65 (dd, *J* = 8.3, 3.1 Hz, 1H), 2.27 – 2.18 (m, 1H), 1.16 (m, 1H), 0.89 (m, 1H), 0.73 (m, 1H), 0.47 – 0.37 (m, 1H), -0.10 (m, 1H).

**<sup>13</sup>C NMR (126 MHz, CDCl<sub>3</sub>)** δ 133.3 (d, *J*<sub>c-p</sub> = 2.8 Hz), 133.2 (d, *J*<sub>c-p</sub> = 3.0 Hz), 132.4 (d, *J*<sub>c-p</sub> = 9.4 Hz), 131.2 (d, *J*<sub>c-p</sub> = 9.8 Hz), 130.2 (d, *J*<sub>c-p</sub> = 99.5 Hz), 129.4 (d, *J*<sub>c-p</sub> = 11.8 Hz), 128.9 (d, *J*<sub>c-p</sub> = 12.1 Hz), 127.6 (d, *J*<sub>c-p</sub> = 100.1 Hz), 112.9 (d, *J*<sub>c-p</sub> = 13.8 Hz), 110.8 (d, *J*<sub>c-p</sub> = 2.7 Hz), 45.9 (d, *J*<sub>c-p</sub> = 67.0 Hz), 23.7 (d, *J*<sub>c-p</sub> = 3.3 Hz), 8.9, 6.1 (d, *J*<sub>c-p</sub> = 10.8 Hz), 5.4.

**<sup>31</sup>P NMR (162 MHz, CDCl<sub>3</sub>)** δ 31.18.

**HRMS (ESI-TOF) m/z:** [M + H]<sup>+</sup> Calcd. for C<sub>19</sub>H<sub>18</sub>N<sub>2</sub>OP 321.1151; Found 321.1150.

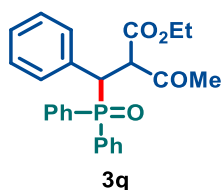

*ethyl 2-((diphenylphosphoryl)(phenyl)methyl)-3-oxobutanoate (dr = 1:1).*

**Physical Appearance:** Light yellow oil

**Yield:** 76% (31.9 mg)

**R<sub>f</sub>:** 0.3 (hexane/ethyl acetate, 7:3 v/v)

**<sup>1</sup>H NMR (500 MHz, CDCl<sub>3</sub>)** δ 7.97 – 7.84 (m, 4H), 7.61 – 7.39 (m, 11H), 7.36 – 7.27 (m, 2H), 7.26 – 7.18 (m, 4H), 7.19 – 7.12 (m, 2H), 7.08 (m, 7H), 4.78 – 4.65 (m, 3H), 4.55 (dd, *J* = 11.2, 7.1 Hz, 1H), 3.84 – 3.63 (m, 3H), 3.60 – 3.50 (m, 1H), 2.13 (s, 3H), 1.96 (s, 3H), 1.05 (t, *J* = 7.1 Hz, 3H), 0.82 (t, *J* = 7.1 Hz, 3H).

**<sup>13</sup>C NMR (126 MHz, CDCl<sub>3</sub>)** δ 200.8 (d, *J*<sub>c-p</sub> = 11.9 Hz), 200.3, 167.4, 166.7 (d, *J*<sub>c-p</sub> = 14.9 Hz), 134.4 (d, *J*<sub>c-p</sub> = 5.0 Hz), 133.8 (d, *J*<sub>c-p</sub> = 5.2 Hz), 132.2 (d, *J*<sub>c-p</sub> = 2.7 Hz), 132.1 (d, *J*<sub>c-p</sub> = 2.8 Hz), 131.96, 131.95 (d, *J*<sub>c-p</sub> = 6.8 Hz), 131.9 (d, *J*<sub>c-p</sub> = 7.1 Hz), 131.63 (d, *J*<sub>c-p</sub> = 8.6 Hz), 131.61, 131.5 (d, *J*<sub>c-p</sub> = 2.8 Hz), 131.3 (d, *J*<sub>c-p</sub> = 8.6 Hz), 130.9, 130.3 (d, *J*<sub>c-p</sub> = 8.1 Hz), 130.1, 128.6 (d, *J*<sub>c-p</sub> = 11.7 Hz), 128.5, 128.4 (d, *J*<sub>c-p</sub> = 9.1 Hz), 128.2 (d, *J*<sub>c-p</sub> = 2.1 Hz), 128.1 (d, *J*<sub>c-p</sub>

= 7.9 Hz), 128.0 (d,  $J_{c-p}$  = 7.9 Hz), 127.5 (d,  $J_{c-p}$  = 2.6 Hz), 127.3 (d,  $J_{c-p}$  = 2.7 Hz), 61.9, 61.7, 60.0, 59.5, 46.5 (d,  $J_{c-p}$  = 7.9 Hz), 45.9 (d,  $J_{c-p}$  = 7.7 Hz), 30.4, 30.3, 13.7 (d,  $J_{c-p}$  = 21.7 Hz).

$^{31}\text{P}$  NMR (162 MHz,  $\text{CDCl}_3$ )  $\delta$  31.78, 30.86.

HRMS (ESI-TOF)  $m/z$ :  $[\text{M} + \text{Na}]^+$  Calcd. for  $\text{C}_{25}\text{H}_{25}\text{NaO}_4\text{P}$  443.1383; Found 443.1380.

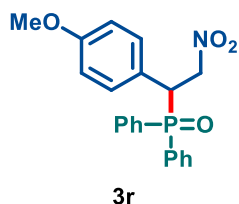

*(1-(4-methoxyphenyl)-2-nitroethyl)diphenylphosphine oxide*

**Physical Appearance:** Light Yellow solid (Mp: 124-126 °C)

**Yield:** 85% (32.4 mg)

**$R_f$ :** 0.3 (hexane/ethyl acetate, 7:3 v/v)

$^1\text{H}$  NMR (400 MHz,  $\text{CDCl}_3$ )  $\delta$  7.96 (dd,  $J$  = 9.5, 8.0 Hz, 2H), 7.67 – 7.57 (m, 3H), 7.50 – 7.37 (m, 3H), 7.30 (dd,  $J$  = 7.8, 3.3 Hz, 2H), 7.20 (dd,  $J$  = 8.7, 1.9 Hz, 2H), 6.74 (d,  $J$  = 8.7 Hz, 2H), 5.10 – 4.98 (m, 1H), 4.77 – 4.64 (m, 1H), 4.42 – 4.31 (m, 1H), 3.73 (s, 3H).

$^{13}\text{C}$  NMR (101 MHz,  $\text{CDCl}_3$ )  $\delta$  159.6 (d,  $J_{c-p}$  = 1.8 Hz), 132.8 (d,  $J_{c-p}$  = 2.6 Hz), 132.2 (d,  $J_{c-p}$  = 2.9 Hz), 131.3 (d,  $J_{c-p}$  = 8.8 Hz), 131.2 (d,  $J_{c-p}$  = 9.2 Hz), 130.7 (d,  $J_{c-p}$  = 5.0 Hz), 129.44 (d,  $J_{c-p}$  = 11.5 Hz), 129.38 (d,  $J_{c-p}$  = 77.9 Hz), 129.2 (d,  $J_{c-p}$  = 84.1 Hz), 128.5 (d,  $J_{c-p}$  = 12.2 Hz), 123.3 (d,  $J_{c-p}$  = 5.8 Hz), 114.4 (d,  $J_{c-p}$  = 1.7 Hz), 76.1 (d,  $J_{c-p}$  = 6.7 Hz), 55.3, 45.2 (d,  $J_{c-p}$  = 65.2 Hz).

$^{31}\text{P}$  NMR (162 MHz,  $\text{CDCl}_3$ )  $\delta$  30.16.

HRMS (ESI-TOF)  $m/z$ :  $[\text{M} + \text{Na}]^+$  Calcd. for  $\text{C}_{21}\text{H}_{20}\text{NNaO}_4\text{P}$  404.1022; Found 404.1007.

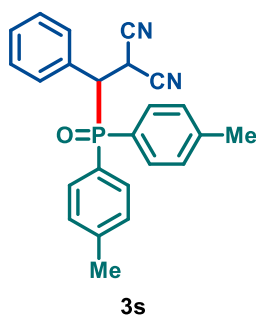

**2-((di-*p*-tolylphosphoryl)(phenyl)methyl)malononitrile**

**Physical Appearance:** White solid (Mp: 153-155 °C)

**Yield:** 87% (33.4 mg)

**R<sub>f</sub>:** 0.3 (hexane/ethyl acetate, 7:3 v/v)

**<sup>1</sup>H NMR (400 MHz, CDCl<sub>3</sub>)** δ 7.83 (dd, *J* = 11.2, 7.8 Hz, 2H), 7.47 – 7.39 (m, 2H), 7.45 – 7.32 (m, 4H), 7.31 – 7.23 (m, 3H), 7.05 (dd, *J* = 8.2, 3.1 Hz, 2H), 4.73 (td, *J* = 7.2, 1.3 Hz, 1H), 4.06 (m, 1H), 2.41 (s, 3H), 2.25 (s, 3H).

**<sup>13</sup>C NMR (101 MHz, CDCl<sub>3</sub>)** δ 143.9 (d, *J*<sub>c-p</sub> = 2.8 Hz), 143.0 (d, *J*<sub>c-p</sub> = 3.0 Hz), 131.34 (d, *J*<sub>c-p</sub> = 9.6 Hz), 131.33 (d, *J*<sub>c-p</sub> = 9.3 Hz), 131.1 (d, *J*<sub>c-p</sub> = 4.1 Hz), 130.0 (d, *J*<sub>c-p</sub> = 12.2 Hz), 129.9 (d, *J*<sub>c-p</sub> = 5.2 Hz), 129.3 (d, *J*<sub>c-p</sub> = 1.8 Hz), 129.2 (d, *J*<sub>c-p</sub> = 1.8 Hz), 129.1, 126.8 (d, *J*<sub>c-p</sub> = 100.4 Hz), 126.1 (d, *J*<sub>c-p</sub> = 107.3 Hz), 111.6 (d, *J*<sub>c-p</sub> = 8.5 Hz), 111.5 (d, *J*<sub>c-p</sub> = 8.8 Hz), 46.9 (d, *J*<sub>c-p</sub> = 63.6 Hz), 24.9 (d, *J*<sub>c-p</sub> = 1.8 Hz), 21.7, 21.6.

**<sup>31</sup>P NMR (162 MHz, CDCl<sub>3</sub>)** δ 29.35.

**HRMS (ESI-TOF) m/z:** [M + Na]<sup>+</sup> Calcd. for C<sub>24</sub>H<sub>21</sub>N<sub>2</sub>NaOP 407.1284; Found 407.1274.

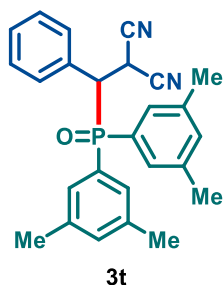

**2-((bis(3,5-dimethylphenyl)phosphoryl)(phenyl)methyl)malononitrile**

**Physical Appearance:** White sticky solid

**Yield:** 91% (37.5 mg)

**R<sub>f</sub>:** 0.3 (hexane/ethyl acetate, 7:3 v/v)

**<sup>1</sup>H NMR (400 MHz, CDCl<sub>3</sub>)** δ 7.50 (dd, *J* = 11.7, 1.5 Hz, 2H), 7.40 (m, 2H), 7.26 (dd, *J* = 4.9, 1.9 Hz, 3H), 7.22 (s, 1H), 7.02 (dd, *J* = 12.1, 1.6 Hz, 2H), 6.96 (s, 1H), 4.64 (t, *J* = 7.2 Hz, 1H), 3.97 (t, *J* = 7.5 Hz, 1H), 2.36 (s, 6H), 2.14 (s, 6H).

**<sup>13</sup>C NMR (101 MHz, CDCl<sub>3</sub>)** δ 139.2 (d, *J*<sub>c-p</sub> = 12.4 Hz), 138.1 (d, *J*<sub>c-p</sub> = 13.1 Hz), 134.9 (d, *J*<sub>c-p</sub> = 2.9 Hz), 134.1 (d, *J*<sub>c-p</sub> = 3.1 Hz), 131.1 (d, *J*<sub>c-p</sub> = 4.1 Hz), 130.0 (d, *J*<sub>c-p</sub> = 5.2 Hz), 129.6

(d,  $J_{c-p} = 96.7$  Hz), 129.3 (d,  $J_{c-p} = 1.9$  Hz), 129.1, 129.0 (d,  $J_{c-p} = 103.8$  Hz), 129.0 (d,  $J_{c-p} = 5.0$  Hz), 128.9 (d,  $J_{c-p} = 4.9$  Hz), 111.6 (d,  $J_{c-p} = 8.9$  Hz), 111.4 (d,  $J_{c-p} = 8.0$  Hz), 46.8 (d,  $J_{c-p} = 62.8$  Hz), 24.9 (d,  $J_{c-p} = 1.8$  Hz), 21.5, 21.2.

$^{31}\text{P}$  NMR (162 MHz,  $\text{CDCl}_3$ )  $\delta$  29.44.

HRMS (ESI-TOF)  $m/z$ :  $[\text{M} + \text{Na}]^+$  Calcd. for  $\text{C}_{26}\text{H}_{25}\text{N}_2\text{NaOP}$  435.1597; Found 435.1584.

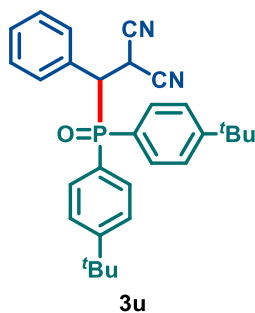

*2-((bis(4-(tert-butyl)phenyl)phosphoryl)(phenyl)methyl)malononitrile*

**Physical Appearance:** Yellow sticky solid

**Yield:** 75% (35.1 mg)

**$R_f$ :** 0.35 (hexane/ethyl acetate, 7:3 v/v)

$^1\text{H}$  NMR (400 MHz,  $\text{CDCl}_3$ )  $\delta$  7.87 (dd,  $J = 11.1, 8.5$  Hz, 2H), 7.58 (dd,  $J = 8.4, 2.9$  Hz, 2H), 7.47 – 7.36 (m, 5H), 7.31 – 7.26 (m, 4H), 4.71 (t,  $J = 7.0$  Hz, 1H), 4.02 (dd,  $J = 8.5, 6.8$  Hz, 1H), 1.34 (s, 9H), 1.21 (s, 9H).

$^{13}\text{C}$  NMR (101 MHz,  $\text{CDCl}_3$ )  $\delta$  156.9 (d,  $J_{c-p} = 2.8$  Hz), 156.1 (d,  $J_{c-p} = 2.9$  Hz), 131.3 (d,  $J_{c-p} = 3.7$  Hz), 131.2 (d,  $J_{c-p} = 3.6$  Hz), 131.0 (d,  $J_{c-p} = 4.0$  Hz), 130.0 (d,  $J_{c-p} = 5.3$  Hz), 129.3 (d,  $J_{c-p} = 1.9$  Hz), 129.2, 126.7 (d,  $J_{c-p} = 100.5$  Hz), 126.6, 126.4 (d,  $J_{c-p} = 12.1$  Hz), 125.5 (d,  $J_{c-p} = 12.6$  Hz), 111.7 (d,  $J_{c-p} = 9.7$  Hz), 111.5 (d,  $J_{c-p} = 7.9$  Hz), 47.2 (d,  $J_{c-p} = 63.4$  Hz), 35.2, 35.0, 31.1, 31.0, 25.1 (d,  $J_{c-p} = 1.9$  Hz).

$^{31}\text{P}$  NMR (162 MHz,  $\text{CDCl}_3$ )  $\delta$  29.22.

HRMS (ESI-TOF)  $m/z$ :  $[\text{M} + \text{Na}]^+$  Calcd. for  $\text{C}_{30}\text{H}_{33}\text{N}_2\text{NaOP}$  491.2223; Found 491.2212.

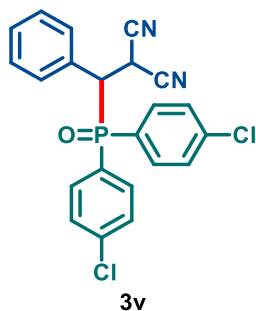

**2-((bis(4-chlorophenyl)phosphoryl)(phenyl)methyl)malononitrile**

**Physical Appearance:** White sticky solid

**Yield:** 86% (36.5 mg)

**R<sub>f</sub>:** 0.35 (hexane/ethyl acetate, 7:3 v/v)

**<sup>1</sup>H NMR (400 MHz, CDCl<sub>3</sub>)** δ 7.88 (dd, *J* = 11.1, 8.5 Hz, 2H), 7.56 (dd, *J* = 8.5, 2.5 Hz, 2H), 7.43 – 7.21 (m, 9H), 4.78 (t, *J* = 7.8 Hz, 1H), 4.07 (t, *J* = 7.9 Hz, 1H).

**<sup>13</sup>C NMR (101 MHz, CDCl<sub>3</sub>)** δ 140.4 (d, *J*<sub>c-p</sub> = 3.4 Hz), 139.5 (d, *J*<sub>c-p</sub> = 3.6 Hz), 132.7 (d, *J*<sub>c-p</sub> = 8.1 Hz), 132.6 (d, *J*<sub>c-p</sub> = 8.3 Hz), 130.4 (d, *J*<sub>c-p</sub> = 4.2 Hz), 129.9 (d, *J*<sub>c-p</sub> = 12.6 Hz), 129.8 (d, *J*<sub>c-p</sub> = 2.0 Hz), 129.7 (d, *J*<sub>c-p</sub> = 5.6 Hz), 129.6, 129.0 (d, *J*<sub>c-p</sub> = 13.0 Hz), 128.1 (d, *J*<sub>c-p</sub> = 99.2 Hz), 127.5 (d, *J*<sub>c-p</sub> = 107.0 Hz), 111.3 (d, *J*<sub>c-p</sub> = 1.7 Hz), 111.2 (d, *J*<sub>c-p</sub> = 4.3 Hz), 46.9 (d, *J*<sub>c-p</sub> = 64.9 Hz), 24.8 (d, *J*<sub>c-p</sub> = 1.7 Hz).

**<sup>31</sup>P NMR (162 MHz, CDCl<sub>3</sub>)** δ 28.06.

**HRMS (ESI-TOF) m/z:** [M + Na]<sup>+</sup> Calcd. for C<sub>22</sub>H<sub>15</sub>Cl<sub>2</sub>N<sub>2</sub>NaOP 447.0191; Found 447.0176.

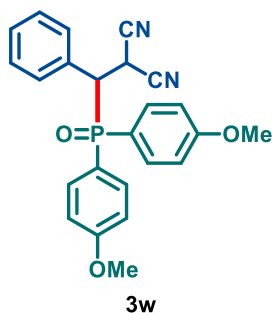

**2-((bis(4-methoxyphenyl)phosphoryl)(phenyl)methyl)malononitrile**

**Physical Appearance:** white sticky solid

**Yield:** 92% (38.3 mg)

**R<sub>f</sub>**: 0.30 (hexane/ethyl acetate, 7:3 v/v)

**<sup>1</sup>H NMR (500 MHz, CDCl<sub>3</sub>)** δ 7.91 – 7.78 (m, 2H), 7.42 – 7.34 (m, 4H), 7.31 – 7.26 (m, 3H), 7.08 (dd, *J* = 8.9, 2.4 Hz, 2H), 6.78 (dd, *J* = 8.9, 2.5 Hz, 2H), 4.79 (t, *J* = 7.2 Hz, 1H), 4.02 (t, *J* = 7.9 Hz, 1H), 3.87 (s, 3H), 3.75 (s, 3H).

**<sup>13</sup>C NMR (126 MHz, CDCl<sub>3</sub>)** δ 163.4 (d, *J*<sub>c-p</sub> = 2.7 Hz), 162.7 (d, *J*<sub>c-p</sub> = 3.0 Hz), 133.4 (d, *J*<sub>c-p</sub> = 10.6 Hz), 133.3 (d, *J*<sub>c-p</sub> = 10.5 Hz), 131.2 (d, *J*<sub>c-p</sub> = 4.0 Hz), 129.9 (d, *J*<sub>c-p</sub> = 5.1 Hz), 129.29, 129.26, 120.9 (d, *J*<sub>c-p</sub> = 105.3 Hz), 120.4 (d, *J*<sub>c-p</sub> = 112.2 Hz), 114.9 (d, *J*<sub>c-p</sub> = 12.9 Hz), 114.0 (d, *J*<sub>c-p</sub> = 13.4 Hz), 111.7 (d, *J*<sub>c-p</sub> = 8.6 Hz), 111.6 (d, *J*<sub>c-p</sub> = 8.5 Hz), 55.5, 55.3, 47.4 (d, *J*<sub>c-p</sub> = 64.0 Hz), 24.8.

**<sup>31</sup>P NMR (162 MHz, CDCl<sub>3</sub>)** δ 29.30.

**HRMS (ESI-TOF) m/z**: [M + H]<sup>+</sup> Calcd. for C<sub>24</sub>H<sub>22</sub>N<sub>2</sub>O<sub>3</sub>P 417.1363; Found 417.1363.

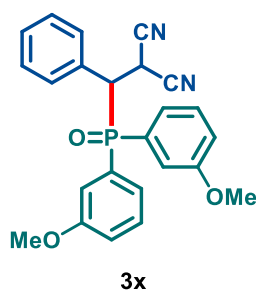

### *2-((bis(3-methoxyphenyl)phosphoryl)(phenyl)methyl)malononitrile*

**Physical Appearance**: Light brown solid (Mp: 181-184 °C)

**Yield**: 83% (34.5 mg)

**R<sub>f</sub>**: 0.30 (hexane/ethyl acetate, 7:3 v/v)

**<sup>1</sup>H NMR (500 MHz, CDCl<sub>3</sub>)** δ 7.54 – 7.45 (m, 3H), 7.43 – 7.37 (m, 2H), 7.29 (dd, *J* = 5.5, 1.8 Hz, 3H), 7.21 – 7.12 (m, 2H), 7.03 (d, *J* = 1.8 Hz, 1H), 7.00 (dt, *J* = 5.4, 3.8 Hz, 1H), 6.93 – 6.88 (m, 1H), 4.71 (t, *J* = 7.4 Hz, 1H), 4.02 (t, *J* = 7.7 Hz, 1H), 3.85 (s, 3H), 3.65 (s, 3H).

**<sup>13</sup>C NMR (126 MHz, CDCl<sub>3</sub>)** δ 160.2 (d, *J*<sub>c-p</sub> = 14.8 Hz), 159.4 (d, *J*<sub>c-p</sub> = 15.0 Hz), 131.1 (d, *J*<sub>c-p</sub> = 97.0 Hz), 130.9 (d, *J*<sub>c-p</sub> = 4.2 Hz), 130.63 (d, *J*<sub>c-p</sub> = 14.2 Hz), 130.57 (d, *J*<sub>c-p</sub> = 104.4 Hz), 129.9 (d, *J*<sub>c-p</sub> = 5.3 Hz), 129.7 (d, *J*<sub>c-p</sub> = 14.9 Hz), 129.5 (d, *J*<sub>c-p</sub> = 2.0 Hz), 129.4, 123.3 (d, *J*<sub>c-p</sub> = 9.8 Hz), 123.1 (d, *J*<sub>c-p</sub> = 9.1 Hz), 119.2 (d, *J*<sub>c-p</sub> = 2.9 Hz), 119.0 (d, *J*<sub>c-p</sub> = 2.8 Hz), 116.8 (d, *J*<sub>c-p</sub> = 9.9 Hz), 116.1 (d, *J*<sub>c-p</sub> = 9.9 Hz), 111.4 (d, *J*<sub>c-p</sub> = 9.2 Hz), 111.3, 55.7, 55.4, 47.0 (d, *J*<sub>c-p</sub> = 63.6 Hz), 25.0.



<sup>31</sup>P NMR (162 MHz, CDCl<sub>3</sub>) δ 29.09.

HRMS (ESI-TOF) m/z: [M +Na]<sup>+</sup> Calcd. for C<sub>24</sub>H<sub>21</sub>N<sub>2</sub>NaO<sub>3</sub>P 439.1182; Found 439.1170

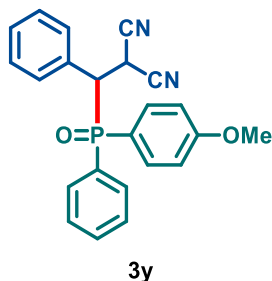

2-(((4-methoxyphenyl)(phenyl)phosphoryl)(phenyl)methyl)malononitrile (*dr*= 1:0.8).

**Physical Appearance:** White solid (Mp: 210-213 °C)

**Yield:** 83% (34.5 mg)

**R<sub>f</sub>:** 0.30 (hexane/ethyl acetate, 7:3 v/v)

<sup>1</sup>H NMR (500 MHz, CDCl<sub>3</sub>) δ 7.97 – 7.86 (m, 4H), 7.65 – 7.53 (m, 3H), 7.46 (dd, *J* = 11.8, 7.7 Hz, 2H), 7.42 – 7.31 (m, 7H), 7.25 (m, 8H), 7.06 (m, 2H), 6.76 (dd, *J* = 8.8, 2.5 Hz, 2H), 4.78 (m, 2H), 4.08 (m, 2H), 3.84 (d, *J* = 3.3 Hz, 3H), 3.72 (d, *J* = 3.3 Hz, 3H).

<sup>13</sup>C NMR (126 MHz, CDCl<sub>3</sub>) δ 163.5 (d, *J*<sub>c-p</sub> = 2.8 Hz), 162.8 (d, *J*<sub>c-p</sub> = 3.0 Hz), 133.4 (d, *J*<sub>c-p</sub> = 10.6 Hz), 133.3, 133.1 (d, *J*<sub>c-p</sub> = 2.5 Hz), 132.2 (d, *J*<sub>c-p</sub> = 2.6 Hz), 131.4, 131.2 (d, *J*<sub>c-p</sub> = 9.5 Hz), 130.6 (d, *J*<sub>c-p</sub> = 107.3 Hz), 130.3 (d, *J*<sub>c-p</sub> = 98.3 Hz), 129.85 (d, *J*<sub>c-p</sub> = 5.7 Hz), 129.79, 129.32, 129.27, 129.2, 128.4, 128.3, 120.5 (d, *J*<sub>c-p</sub> = 66.9 Hz), 119.7 (d, *J*<sub>c-p</sub> = 73.8 Hz), 115.0 (d, *J*<sub>c-p</sub> = 12.9 Hz), 114.1 (d, *J*<sub>c-p</sub> = 13.4 Hz), 111.7 – 111.4 (m), 55.5, 55.3, 47.0 (d, *J*<sub>c-p</sub> = 64.0 Hz), 47.0 (d, *J*<sub>c-p</sub> = 63.3 Hz), 24.9, 24.8.

<sup>31</sup>P NMR (162 MHz, CDCl<sub>3</sub>) δ 29.20.

HRMS (ESI-TOF) m/z: [M +H]<sup>+</sup> Calcd. for C<sub>23</sub>H<sub>20</sub>N<sub>2</sub>O<sub>2</sub>P 387.1257; Found 387.1248.

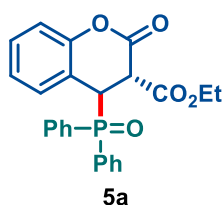

ethyl 4-(diphenylphosphoryl)-2-oxochromane-3-carboxylate

**Physical Appearance:** White solid (Mp: 180- 184 °C)

**Yield:** 91% (38.2 mg)

**R<sub>f</sub>:** 0.40 (hexane/ethyl acetate, 7:3 v/v)

**<sup>1</sup>H NMR (400 MHz, CDCl<sub>3</sub>)** δ 7.91 (m, 2H), 7.68 – 7.44 (m, 6H), 7.38 (m, 2H), 7.20 (dt, *J* = 7.7, 1.8 Hz, 1H), 7.02 (dd, *J* = 8.3, 1.2 Hz, 1H), 6.82 (t, *J* = 7.5 Hz, 1H), 6.50 (dt, *J* = 7.7, 2.0 Hz, 1H), 4.36 (dd, *J* = 10.0, 1.2 Hz, 1H), 4.15 – 3.97 (m, 3H), 1.04 (t, *J* = 7.1 Hz, 3H).

**<sup>13</sup>C NMR (101 MHz, CDCl<sub>3</sub>)** δ 166.8 (d, *J*<sub>c-p</sub> = 17.3 Hz), 162.0, 152.1 (d, *J*<sub>c-p</sub> = 4.3 Hz), 133.0 (d, *J*<sub>c-p</sub> = 2.8 Hz), 132.8 (d, *J*<sub>c-p</sub> = 2.9 Hz), 131.8 (d, *J*<sub>c-p</sub> = 9.0 Hz), 131.6 (d, *J*<sub>c-p</sub> = 8.9 Hz), 129.71 (d, *J*<sub>c-p</sub> = 6.1 Hz), 129.71, 129.3 (d, *J*<sub>c-p</sub> = 11.8 Hz), 129.1 (d, *J*<sub>c-p</sub> = 97.7 Hz), 128.6 (d, *J*<sub>c-p</sub> = 12.0 Hz), 128.3 (d, *J*<sub>c-p</sub> = 100.5 Hz), 124.2 (d, *J*<sub>c-p</sub> = 2.7 Hz), 117.6 (d, *J*<sub>c-p</sub> = 2.7 Hz), 115.2 (d, *J*<sub>c-p</sub> = 5.1 Hz), 63.0, 46.2, 42.0 (d, *J*<sub>c-p</sub> = 65.7 Hz), 13.8.

**<sup>31</sup>P NMR (162 MHz, CDCl<sub>3</sub>)** δ 30.84.

**HRMS (ESI-TOF) m/z:** [M +Na]<sup>+</sup> Calcd. for C<sub>24</sub>H<sub>21</sub>NaO<sub>5</sub>P 443.1019; Found 443.1003.

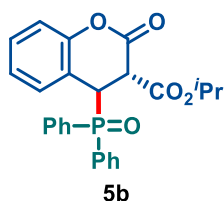

*Isopropyl-4-(diphenylphosphoryl)-2-oxochromane-3-carboxylate*

**Physical Appearance:** White sticky solid

**Yield:** 90% (39.0 mg)

**R<sub>f</sub>:** 0.40 (hexane/ethyl acetate, 7:3 v/v)

**<sup>1</sup>H NMR (400 MHz, CDCl<sub>3</sub>)** δ 7.98 – 7.84 (m, 2H), 7.69 – 7.44 (m, 6H), 7.38 (td, *J* = 7.6, 3.0 Hz, 2H), 7.21 (tt, *J* = 7.7, 1.7 Hz, 1H), 7.02 (d, *J* = 8.2 Hz, 1H), 6.81 (t, *J* = 7.5 Hz, 1H), 6.49 (dt, *J* = 7.8, 1.9 Hz, 1H), 4.85 (hept, *J* = 6.3 Hz, 1H), 4.32 (dd, *J* = 9.7, 1.2 Hz, 1H), 4.04 (dd, *J* = 9.5, 1.2 Hz, 1H), 1.10 (d, *J* = 6.3 Hz, 3H), 0.88 (d, *J* = 6.2 Hz, 3H).

**<sup>13</sup>C NMR (101 MHz, CDCl<sub>3</sub>)** δ 166.4 (d, *J*<sub>c-p</sub> = 17.2 Hz), 162.2, 152.2 (d, *J*<sub>c-p</sub> = 4.2 Hz), 132.9 (d, *J*<sub>c-p</sub> = 2.9 Hz), 132.8 (d, *J*<sub>c-p</sub> = 2.9 Hz), 131.8 (d, *J*<sub>c-p</sub> = 9.0 Hz), 131.6 (d, *J*<sub>c-p</sub> = 9.0 Hz), 129.67 (d, *J*<sub>c-p</sub> = 6.3 Hz), 129.67, 129.3 (d, *J*<sub>c-p</sub> = 11.6 Hz), 129.0, 128.6 (d, *J*<sub>c-p</sub> = 12.1 Hz),

128.0, 124.2 (d,  $J_{c-p} = 2.7$  Hz), 117.5 (d,  $J_{c-p} = 2.5$  Hz), 115.4 (d,  $J_{c-p} = 5.1$  Hz), 71.1, 46.5, 42.2 (d,  $J_{c-p} = 65.7$  Hz), 21.3, 21.2.

$^{31}\text{P}$  NMR (162 MHz,  $\text{CDCl}_3$ )  $\delta$  30.57.

HRMS (ESI-TOF)  $m/z$ :  $[\text{M} + \text{Na}]^+$  Calcd. for  $\text{C}_{25}\text{H}_{23}\text{NaO}_5\text{P}$  457.1175; Found 457.1154.

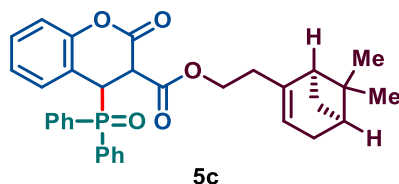

*2-((1R,5S)-6,6-dimethylbicyclo[3.1.1]hept-2-en-2-yl)ethyl-4-(diphenylphosphoryl)-2-oxochromane-3-carboxylate* ( $dr = 1:1$ ).

**Physical Appearance:** White sticky solid

**Yield:** 86% (46.5 mg)

**$R_f$ :** 0.40 (hexane/ethyl acetate, 7:3 v/v)

$^1\text{H}$  NMR (500 MHz,  $\text{CDCl}_3$ )  $\delta$  7.89 (td,  $J = 9.2, 2.8$  Hz, 2H), 7.61 (t,  $J = 7.6$  Hz, 1H), 7.57 – 7.45 (m, 5H), 7.36 (td,  $J = 7.6, 3.3$  Hz, 2H), 7.20 (t,  $J = 8.2$  Hz, 1H), 6.99 (d,  $J = 8.4$  Hz, 1H), 6.84 – 6.77 (m, 1H), 6.48 (d,  $J = 7.8$  Hz, 1H), 5.08 (d,  $J = 10.0$  Hz, 1H), 4.38 (d,  $J = 10.2$  Hz, 1H), 4.13 – 3.91 (m, 3H), 2.25 (tt,  $J = 8.8, 4.0$  Hz, 1H), 2.18 – 2.04 (m, 4H), 1.91 – 1.84 (m, 1H), 1.19 (s, 3H), 1.06 – 0.85 (m, 1H), 0.80 – 0.56 (m, 3H).

$^{13}\text{C}$  NMR (126 MHz,  $\text{CDCl}_3$ )  $\delta$  174.2, 166.7 (d,  $J_{c-p} = 17.1$  Hz), 161.5, 152.0 (d,  $J_{c-p} = 4.2$  Hz), 143.1 (d,  $J_{c-p} = 5.8$  Hz), 133.0 (d,  $J_{c-p} = 2.7$  Hz), 132.8 (d,  $J_{c-p} = 2.7$  Hz), 131.8 (d,  $J_{c-p} = 9.1$  Hz), 131.5 (d,  $J_{c-p} = 9.0$  Hz), 129.7, 129.6, 129.3, 129.2, 128.6 (d,  $J_{c-p} = 12.0$  Hz), 128.4 (d,  $J_{c-p} = 5.5$  Hz), 127.6, 124.2 (d,  $J_{c-p} = 2.7$  Hz), 119.2 (d,  $J_{c-p} = 8.2$  Hz), 117.5 (d,  $J_{c-p} = 2.6$  Hz), 114.9 (d,  $J_{c-p} = 4.2$  Hz), 64.9, 64.8, 46.1, 45.5, 45.4, 42.0 (d,  $J_{c-p} = 4.1$  Hz), 41.5 (d,  $J_{c-p} = 3.9$  Hz), 40.6, 37.93, 37.88, 35.6, 35.5, 31.6, 31.5, 31.3, 26.18, 26.16, 21.1, 21.0.

$^{31}\text{P}$  NMR (162 MHz,  $\text{CDCl}_3$ )  $\delta$  32.35.

HRMS (ESI-TOF)  $m/z$ :  $[\text{M} + \text{Na}]^+$  Calcd. for  $\text{C}_{33}\text{H}_{33}\text{NaO}_5\text{P}$  563.1958; Found 563.1931.

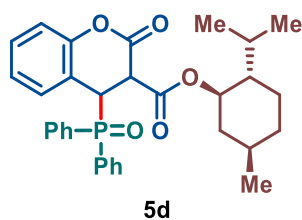

**(1R,2S,5R)-2-isopropyl-5-methylcyclohexyl-4-(diphenylphosphoryl)-2-oxochromane-3-carboxylate** (*dr* = 1:1).

**Physical Appearance:** White sticky solid

**Yield:** 86% (45.6 mg)

**R<sub>f</sub>:** 0.40 (hexane/ethyl acetate, 7:3 v/v)

**<sup>1</sup>H NMR (400 MHz, CDCl<sub>3</sub>)** δ 7.96 – 7.86 (m, 2H), 7.64 – 7.48 (m, 6H), 7.37 (m, 2H), 7.26 – 7.18 (m, 1H), 7.01 (m, 1H), 6.81 (m, 1H), 6.48 (m, 1H), 4.52 (m, 1H), 4.37 – 4.28 (m, 1H), 4.06 (m, 1H), 2.05 – 1.77 (m, 1H), 1.67 – 1.46 (m, 3H), 1.40 – 1.12 (m, 3H), 0.97 – 0.85 (m, 1H), 0.79 (dd, *J* = 15.9, 6.8 Hz, 4H), 0.71 (d, *J* = 6.5 Hz, 2H), 0.57 (dd, *J* = 11.3, 6.9 Hz, 3H), 0.19 (d, *J* = 7.0 Hz, 1H).

**<sup>13</sup>C NMR (101 MHz, CDCl<sub>3</sub>)** δ 166.6 (d, *J*<sub>c-p</sub> = 17.5 Hz), 166.5 (d, *J*<sub>c-p</sub> = 17.1 Hz), 162.2, 162.1 (d, *J*<sub>c-p</sub> = 1.7 Hz), 152.3 (d, *J*<sub>c-p</sub> = 4.2 Hz), 152.2 (d, *J*<sub>c-p</sub> = 4.1 Hz), 132.94 (d, *J*<sub>c-p</sub> = 4.8 Hz), 132.92, 132.8 (d, *J*<sub>c-p</sub> = 2.8 Hz), 132.7 (d, *J*<sub>c-p</sub> = 2.9 Hz), 131.8, 131.75, 131.67, 131.6 (d, *J*<sub>c-p</sub> = 8.9 Hz), 129.8 (d, *J*<sub>c-p</sub> = 3.9 Hz), 129.63, 129.61 (d, *J*<sub>c-p</sub> = 9.9 Hz), 129.60, 129.38, 129.36, 129.3, 129.2, 128.6 (d, *J*<sub>c-p</sub> = 100.7 Hz), 128.64, 128.62, 128.60, 128.52, 128.51, 128.3 (d, *J*<sub>c-p</sub> = 100.3 Hz), 124.1 (d, *J*<sub>c-p</sub> = 2.6 Hz), 117.6 (d, *J*<sub>c-p</sub> = 3.0 Hz), 117.5, 115.4 (d, *J*<sub>c-p</sub> = 5.0 Hz), 115.2 (d, *J*<sub>c-p</sub> = 5.0 Hz), 46.6, 46.54, 46.48, 46.3, 42.4 (d, *J*<sub>c-p</sub> = 65.5 Hz), 42.3 (d, *J*<sub>c-p</sub> = 65.9 Hz), 40.2, 39.9, 33.9, 31.4, 31.2, 26.0, 25.3, 23.1, 22.6, 21.9, 21.8, 20.8, 20.7, 16.0, 15.1.

**<sup>31</sup>P NMR (162 MHz, CDCl<sub>3</sub>)** δ 30.86, 30.35.

**HRMS (ESI-TOF) m/z:** [M + Na]<sup>+</sup> Calcd. for C<sub>32</sub>H<sub>35</sub>NaO<sub>5</sub>P 563.1958; Found 563.1931.

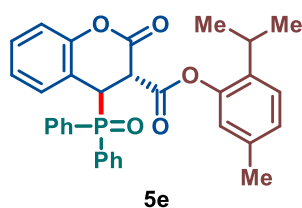

**2-isopropyl-5-methylphenyl-4-(diphenylphosphoryl)-2-oxochromane-3-carboxylate**

**Physical Appearance:** White sticky solid

**Yield:** 90% (47.1 mg)

**R<sub>f</sub>:** 0.40 (hexane/ethyl acetate, 7:3 v/v)

**<sup>1</sup>H NMR (500 MHz, CDCl<sub>3</sub>)** δ 8.01 – 7.94 (m, 2H), 7.65 (td, *J* = 7.3, 1.5 Hz, 1H), 7.61 – 7.51 (m, 5H), 7.40 (td, *J* = 8.0, 3.0 Hz, 2H), 7.28 (d, *J* = 8.2 Hz, 1H), 7.09 (d, *J* = 8.2 Hz, 1H), 7.05 (d, *J* = 7.9 Hz, 1H), 6.95 (dd, *J* = 8.0, 1.7 Hz, 1H), 6.88 (t, *J* = 7.5 Hz, 1H), 6.57 (dt, *J* = 7.8, 1.9 Hz, 1H), 6.53 (s, 1H), 4.48 (d, *J* = 9.8 Hz, 1H), 4.37 (dd, *J* = 9.6, 1.2 Hz, 1H), 2.26 – 2.20 (m, 1H), 2.20 (s, 3H), 0.90 (d, *J* = 6.9 Hz, 3H), 0.81 (d, *J* = 6.9 Hz, 3H).

**<sup>13</sup>C NMR (126 MHz, CDCl<sub>3</sub>)** δ 166.1 (d, *J*<sub>c-p</sub> = 17.6 Hz), 161.6, 152.2 (d, *J*<sub>c-p</sub> = 4.2 Hz), 147.2, 136.7 (d, *J*<sub>c-p</sub> = 11.7 Hz), 133.0 (d, *J*<sub>c-p</sub> = 2.8 Hz), 133.0 (d, *J*<sub>c-p</sub> = 2.8 Hz), 131.8 (d, *J*<sub>c-p</sub> = 9.0 Hz), 131.6 (d, *J*<sub>c-p</sub> = 9.0 Hz), 129.9 (d, *J*<sub>c-p</sub> = 3.0 Hz), 129.8 (d, *J*<sub>c-p</sub> = 3.7 Hz), 129.4 (d, *J*<sub>c-p</sub> = 11.7 Hz), 129.0 (d, *J*<sub>c-p</sub> = 97.9 Hz), 128.6 (d, *J*<sub>c-p</sub> = 12.0 Hz), 128.2 (d, *J*<sub>c-p</sub> = 100.7 Hz), 127.9, 126.5, 124.4 (d, *J*<sub>c-p</sub> = 2.7 Hz), 121.9, 117.8 (d, *J*<sub>c-p</sub> = 2.6 Hz), 115.3 (d, *J*<sub>c-p</sub> = 4.9 Hz), 46.4, 42.3 (d, *J*<sub>c-p</sub> = 65.1 Hz), 26.6, 23.0, 22.9, 20.7.

**<sup>31</sup>P NMR (162 MHz, CDCl<sub>3</sub>)** δ 30.77.

**HRMS (ESI-TOF) m/z:** [M + Na]<sup>+</sup> Calcd. for C<sub>32</sub>H<sub>29</sub>NaO<sub>5</sub>P 547.1645; Found 547.1619.

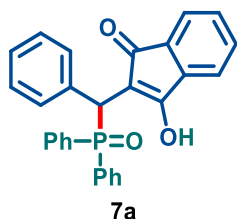

**2-((diphenylphosphoryl)(phenyl)methyl)-3-hydroxy-1H-inden-1-one**

**Physical Appearance:** Yellow solid (Mp- 205-207 °C)

**Yield:** 91% (39.7 mg)

**R<sub>f</sub>:** 0.75 (hexane/ethyl acetate, 7:3 v/v)

**<sup>1</sup>H NMR (500 MHz, CDCl<sub>3</sub>)** δ 14.25 (s, 1H), 7.95 – 7.88 (m, 2H), 7.53 (m, 3H), 7.46 – 7.37 (m, 3H), 7.34 (dd, *J* = 6.3, 4.7 Hz, 3H), 7.30 (td, *J* = 7.8, 3.2 Hz, 2H), 7.27 – 7.22 (m, 3H), 7.19 – 7.11 (m, 3H), 5.02 (d, *J* = 9.0 Hz, 1H).

<sup>13</sup>C NMR (126 MHz, CDCl<sub>3</sub>) δ 193.7 (d, *J*<sub>c-p</sub> = 9.1 Hz), 175.6 (d, *J*<sub>c-p</sub> = 5.5 Hz), 140.0, 135.4 (d, *J*<sub>c-p</sub> = 4.6 Hz), 132.8 (d, *J*<sub>c-p</sub> = 2.8 Hz), 132.7 (d, *J*<sub>c-p</sub> = 60.2 Hz), 132.4, 131.3 (d, *J*<sub>c-p</sub> = 9.7 Hz), 131.0 (d, *J*<sub>c-p</sub> = 9.2 Hz), 130.3 (d, *J*<sub>c-p</sub> = 23.7 Hz), 130.0, 129.6 (d, *J*<sub>c-p</sub> = 4.9 Hz), 129.5, 129.2 (d, *J*<sub>c-p</sub> = 11.8 Hz), 128.7, 128.5, 128.4 (d, *J*<sub>c-p</sub> = 14.8 Hz), 127.3 (d, *J*<sub>c-p</sub> = 2.6 Hz), 120.8, 119.3, 105.1 (d, *J*<sub>c-p</sub> = 3.9 Hz), 41.8 (d, *J*<sub>c-p</sub> = 66.6 Hz).

<sup>31</sup>P NMR (162 MHz, CDCl<sub>3</sub>) δ 43.27.

HRMS (ESI-TOF) *m/z*: [M + Na]<sup>+</sup> Calcd. for C<sub>28</sub>H<sub>21</sub>NaO<sub>3</sub>P 459.1121; Found 459.1106

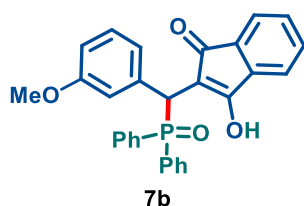

**2-((diphenylphosphoryl)(3-methoxyphenyl)methyl)-3-hydroxy-1H-inden-1-one**

**Physical Appearance:** Yellow sticky solid

**Yield:** 91% (42.4 mg)

**R<sub>f</sub>:** 0.75 (hexane/ethyl acetate, 7:3 v/v)

<sup>1</sup>H NMR (400 MHz, CDCl<sub>3</sub>) δ 14.18 (s, 1H), 7.99 – 7.81 (m, 2H), 7.55 – 7.44 (m, 3H), 7.43 – 7.36 (m, 3H), 7.35 – 7.25 (m, 5H), 7.21 (m, 1H), 7.04 (t, *J* = 8.0 Hz, 1H), 6.84 (m, 1H), 6.71 (d, *J* = 2.2 Hz, 1H), 6.67 (m, 1H), 4.96 (d, *J* = 9.1 Hz, 1H), 3.60 (s, 3H).

<sup>13</sup>C NMR (101 MHz, CDCl<sub>3</sub>) δ 193.7 (d, *J*<sub>c-p</sub> = 9.0 Hz), 175.7 (d, *J*<sub>c-p</sub> = 5.6 Hz), 159.4 (d, *J*<sub>c-p</sub> = 2.1 Hz), 140.0, 136.7 (d, *J*<sub>c-p</sub> = 4.5 Hz), 132.9, 132.8 (d, *J*<sub>c-p</sub> = 2.9 Hz), 132.4 (d, *J*<sub>c-p</sub> = 2.9 Hz), 132.4, 131.3 (d, *J*<sub>c-p</sub> = 9.8 Hz), 130.9 (d, *J*<sub>c-p</sub> = 9.1 Hz), 130.0, 130.0 (d, *J*<sub>c-p</sub> = 98.5 Hz), 129.4 (d, *J*<sub>c-p</sub> = 2.3 Hz), 129.22 (d, *J*<sub>c-p</sub> = 11.7 Hz), 129.18 (d, *J*<sub>c-p</sub> = 102.8 Hz), 128.4 (d, *J*<sub>c-p</sub> = 12.5 Hz), 122.0 (d, *J*<sub>c-p</sub> = 5.1 Hz), 120.7, 119.3, 114.8 (d, *J*<sub>c-p</sub> = 4.9 Hz), 113.4 (d, *J*<sub>c-p</sub> = 2.6 Hz), 105.0 (d, *J*<sub>c-p</sub> = 4.0 Hz), 55.1, 41.8 (d, *J*<sub>c-p</sub> = 66.5 Hz).

<sup>31</sup>P NMR (162 MHz, CDCl<sub>3</sub>) δ 43.19.

HRMS (ESI-TOF) *m/z*: [M + Na]<sup>+</sup> Calcd. for C<sub>29</sub>H<sub>23</sub>NaO<sub>4</sub>P 489.1226; Found 489.1207

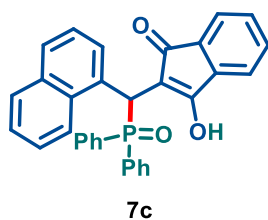

**2-((diphenylphosphoryl)(naphthalen-1-yl)methyl)-3-hydroxy-1H-inden-1-one**

**Physical Appearance:** Light Yellow solid (Mp: 222-225 °C)

**Yield:** 93% (45.2 mg)

**R<sub>f</sub>:** 0.75 (hexane/ethyl acetate, 7:3 v/v)

**<sup>1</sup>H NMR (400 MHz, CDCl<sub>3</sub>)** δ 14.33 (s, 1H), 8.08 (dd, *J* = 6.2, 3.9 Hz, 1H), 8.04 – 7.94 (m, 3H), 7.73 – 7.63 (m, 2H), 7.66 – 7.48 (m, 3H), 7.45 (t, *J* = 7.8 Hz, 1H), 7.37 – 7.26 (m, 5H), 7.26 – 7.15 (m, 1H), 7.19 – 7.05 (m, 3H), 6.94 (td, *J* = 7.8, 3.4 Hz, 2H), 5.95 (d, *J* = 9.4 Hz, 1H).

**<sup>13</sup>C NMR (101 MHz, CDCl<sub>3</sub>)** δ 193.9 (d, *J*<sub>c-p</sub> = 9.0 Hz), 176.0 (d, *J*<sub>c-p</sub> = 5.5 Hz), 140.3, 133.6, 132.9 (d, *J*<sub>c-p</sub> = 2.9 Hz), 132.8, 132.4, 132.2 (d, *J*<sub>c-p</sub> = 2.9 Hz), 132.1 (d, *J*<sub>c-p</sub> = 4.2 Hz), 131.4 (d, *J*<sub>c-p</sub> = 5.2 Hz), 131.2 (d, *J*<sub>c-p</sub> = 2.6 Hz), 131.1 (d, *J*<sub>c-p</sub> = 3.6 Hz), 130.05, 129.98 (d, *J*<sub>c-p</sub> = 98.4 Hz), 129.3 (d, *J*<sub>c-p</sub> = 11.8 Hz), 128.9 (d, *J*<sub>c-p</sub> = 99.9 Hz), 128.6, 128.3, 128.1 (d, *J*<sub>c-p</sub> = 5.4 Hz), 128.0 (d, *J*<sub>c-p</sub> = 12.3 Hz), 126.1, 125.6 (d, *J*<sub>c-p</sub> = 2.7 Hz), 125.3, 123.0, 120.8, 119.3, 106.1 (d, *J*<sub>c-p</sub> = 4.0 Hz), 35.8 (d, *J*<sub>c-p</sub> = 67.3 Hz).

**<sup>31</sup>P NMR (162 MHz, CDCl<sub>3</sub>)** δ 43.22.

**HRMS (ESI-TOF) m/z:** [M + H]<sup>+</sup> Calcd. for C<sub>32</sub>H<sub>24</sub>O<sub>3</sub>P 487.1458; Found 487.1442

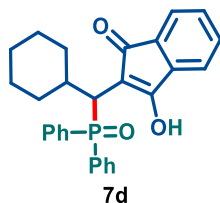

**2-(cyclohexyl(diphenylphosphoryl)methyl)-3-hydroxy-1H-inden-1-one**

**Physical Appearance:** Yellow sticky solid

**Yield:** 89% (39.3 mg)

**R<sub>f</sub>**: 0.70 (hexane/ethyl acetate, 7:3 v/v)

**<sup>1</sup>H NMR (400 MHz, CDCl<sub>3</sub>)** δ 13.68 (s, 1H), 7.86 – 7.67 (m, 4H), 7.62 – 7.48 (m, 3H), 7.46 – 7.30 (m, 5H), 7.27 – 7.21 (m, 2H), 3.72 (dd, *J* = 9.2, 3.2 Hz, 1H), 2.30 – 2.19 (m, 1H), 1.79 – 1.61 (m, 2H), 1.60 – 1.40 (m, 3H), 1.16 (m, 1H), 1.07 – 0.90 (m, 4H).

**<sup>13</sup>C NMR (101 MHz, CDCl<sub>3</sub>)** δ 194.9 (d, *J*<sub>c-p</sub> = 8.9 Hz), 177.0 (d, *J*<sub>c-p</sub> = 5.6 Hz), 140.1, 133.0, 132.5 (d, *J*<sub>c-p</sub> = 2.9 Hz), 132.35, 132.29 (d, *J*<sub>c-p</sub> = 2.7 Hz), 131.6 (d, *J*<sub>c-p</sub> = 99.7 Hz), 131.0 (d, *J*<sub>c-p</sub> = 9.8 Hz), 130.9, 130.4 (d, *J*<sub>c-p</sub> = 9.1 Hz), 129.9, 129.1 (d, *J*<sub>c-p</sub> = 5.8 Hz), 129.0 (d, *J*<sub>c-p</sub> = 5.5 Hz), 120.7, 119.1, 102.5 (d, *J*<sub>c-p</sub> = 4.3 Hz), 40.3, 38.9 (d, *J*<sub>c-p</sub> = 69.0 Hz), 33.3 (d, *J*<sub>c-p</sub> = 12.8 Hz), 30.1 (d, *J*<sub>c-p</sub> = 2.1 Hz), 26.6 (d, *J*<sub>c-p</sub> = 1.7 Hz), 26.3, 25.7.

**<sup>31</sup>P NMR (162 MHz, CDCl<sub>3</sub>)** δ 45.04.

**HRMS (ESI-TOF) m/z**: [M +Na]<sup>+</sup> Calcd. for C<sub>28</sub>H<sub>27</sub>NaO<sub>3</sub>P 465.1590; Found 465.1577.

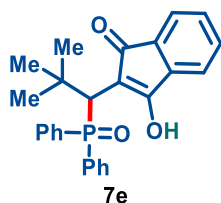

**2-(1-(diphenylphosphoryl)-2,2-dimethylpropyl)-3-hydroxy-1H-inden-1-one**

**Physical Appearance**: Light yellow sticky solid

**Yield**: 88% 36.6 mg)

**R<sub>f</sub>**: 0.70 (hexane/ethyl acetate, 7:3 v/v)

**<sup>1</sup>H NMR (500 MHz, CDCl<sub>3</sub>)** δ 13.75 (s, 1H), 7.92 – 7.84 (m, 2H), 7.80 – 7.72 (m, 2H), 7.51 (m, 3H), 7.41 – 7.28 (m, 5H), 7.26 – 7.19 (m, 2H), 3.82 (d, *J* = 8.5 Hz, 1H), 0.99 (s, 9H).

**<sup>13</sup>C NMR (126 MHz, CDCl<sub>3</sub>)** δ 194.6 (d, *J*<sub>c-p</sub> = 8.1 Hz), 176.0 (d, *J*<sub>c-p</sub> = 5.8 Hz), 139.9, 133.4 (d, *J*<sub>c-p</sub> = 101.1 Hz), 132.9 (d, *J*<sub>c-p</sub> = 93.1 Hz), 132.4, 132.2, 132.1 (d, *J*<sub>c-p</sub> = 3.1 Hz), 131.7 (d, *J*<sub>c-p</sub> = 2.6 Hz), 131.0 (d, *J*<sub>c-p</sub> = 10.2 Hz), 129.8, 129.4 (d, *J*<sub>c-p</sub> = 8.7 Hz), 128.9 (d, *J*<sub>c-p</sub> = 10.5 Hz), 128.8 (d, *J*<sub>c-p</sub> = 10.2 Hz), 120.6, 118.9, 105.0 (d, *J*<sub>c-p</sub> = 4.0 Hz), 43.7 (d, *J*<sub>c-p</sub> = 66.5 Hz), 38.7, 30.5, 30.4.

**<sup>31</sup>P NMR (202 MHz, CDCl<sub>3</sub>)** δ 41.23.

**HRMS (ESI-TOF) m/z**: [M +Na]<sup>+</sup> Calcd. for C<sub>26</sub>H<sub>25</sub>NaO<sub>3</sub>P 439.1434; Found 439.1418.



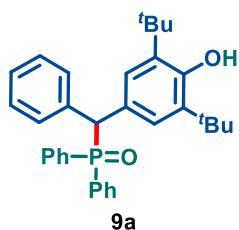

***((3,5-di-tert-butyl-4-hydroxyphenyl)(phenyl)methyl)diphenylphosphine oxide***

**Physical Appearance:** White solid (Mp: 220-222 °C)

**Yield:** 81% (40.2 mg)

**R<sub>f</sub>:** 0.40 (hexane/ethyl acetate, 7:3 v/v)

**<sup>1</sup>H NMR (400 MHz, CDCl<sub>3</sub>)** δ 7.73 (m, 2H), 7.61 (dt, *J* = 8.1, 1.3 Hz, 2H), 7.55 – 7.47 (m, 2H), 7.44 – 7.34 (m, 4H), 7.33 – 7.27 (m, 2H), 7.24 (dd, *J* = 8.3, 6.6 Hz, 2H), 7.19 – 7.14 (m, 1H), 7.11 (d, *J* = 1.8 Hz, 2H), 5.08 (s, 1H), 4.68 (d, *J* = 9.7 Hz, 1H), 1.32 (s, 18H).

**<sup>13</sup>C NMR (101 MHz, CDCl<sub>3</sub>)** δ 152.7 (d, *J*<sub>c-p</sub> = 2.5 Hz), 137.7 (d, *J*<sub>c-p</sub> = 3.9 Hz), 135.5 (d, *J*<sub>c-p</sub> = 1.7 Hz), 133.1 (d, *J*<sub>c-p</sub> = 98.6 Hz), 132.5 (d, *J*<sub>c-p</sub> = 95.5 Hz), 131.5 (d, *J*<sub>c-p</sub> = 8.5 Hz), 131.38 (d, *J*<sub>c-p</sub> = 8.6 Hz), 131.36, 131.1 (d, *J*<sub>c-p</sub> = 2.8 Hz), 129.9 (d, *J*<sub>c-p</sub> = 7.2 Hz), 128.5, 128.3 (d, *J*<sub>c-p</sub> = 11.4 Hz), 127.9 (d, *J*<sub>c-p</sub> = 11.5 Hz), 126.8, 126.7, 126.6 (d, *J*<sub>c-p</sub> = 5.5 Hz), 53.6 (d, *J*<sub>c-p</sub> = 66.1 Hz), 34.2, 30.2.

**<sup>31</sup>P NMR (162 MHz, CDCl<sub>3</sub>)** δ 31.23.

**HRMS (ESI-TOF) m/z:** [M + H]<sup>+</sup> Calcd. for C<sub>33</sub>H<sub>38</sub>O<sub>2</sub>P 497.2604; Found 497.2594.

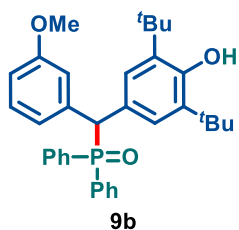

***((3,5-di-tert-butyl-4-hydroxyphenyl)(3-methoxyphenyl)methyl)diphenylphosphine oxide***

**Physical Appearance:** Light Yellow solid (Mp: 137-138 °C)

**Yield:** 84% (44.2 mg)

**R<sub>f</sub>:** 0.40 (hexane/ethyl acetate, 7:3 v/v)

**<sup>1</sup>H NMR (500 MHz, CDCl<sub>3</sub>)** δ 7.79 – 7.68 (m, 2H), 7.54 – 7.44 (m, 2H), 7.42 – 7.33 (m, 4H), 7.28 (dd, *J* = 7.7, 2.9 Hz, 1H), 7.20 – 7.16 (m, 2H), 7.13 (t, *J* = 7.8 Hz, 1H), 7.08 (d, *J* = 1.8 Hz, 2H), 6.70 (m, 1H), 4.64 (d, *J* = 9.8 Hz, 1H), 3.71 (s, 3H), 1.30 (s, 18H).

**<sup>13</sup>C NMR (126 MHz, CDCl<sub>3</sub>)** δ 159.5, 152.9 (d, *J*<sub>c-p</sub> = 2.5 Hz), 139.2 (d, *J*<sub>c-p</sub> = 3.8 Hz), 135.6, 133.1 (d, *J*<sub>c-p</sub> = 68.7 Hz), 132.4 (d, *J*<sub>c-p</sub> = 65.7 Hz), 131.6 (d, *J*<sub>c-p</sub> = 8.5 Hz), 131.5, 131.4 (d, *J*<sub>c-p</sub> = 8.6 Hz), 131.2 (d, *J*<sub>c-p</sub> = 2.8 Hz), 129.5, 128.4 (d, *J*<sub>c-p</sub> = 11.3 Hz), 128.0 (d, *J*<sub>c-p</sub> = 11.4 Hz), 126.8 (d, *J*<sub>c-p</sub> = 5.9 Hz), 126.5 (d, *J*<sub>c-p</sub> = 5.5 Hz), 122.4 (d, *J*<sub>c-p</sub> = 7.3 Hz), 115.1 (d, *J*<sub>c-p</sub> = 7.3 Hz), 113.0, 55.2, 53.6 (d, *J*<sub>c-p</sub> = 66.0 Hz), 34.3, 30.2.

**<sup>31</sup>P NMR (162 MHz, CDCl<sub>3</sub>)** δ 31.19.

**HRMS (ESI-TOF) m/z:** [M + H]<sup>+</sup> Calcd. for C<sub>34</sub>H<sub>40</sub>O<sub>3</sub>P 527.2710; Found 527.2693.

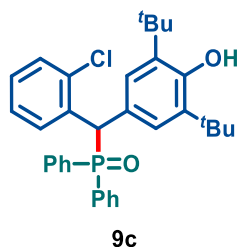

*((2-chlorophenyl)(3,5-di-tert-butyl-4-hydroxyphenyl)methyl)diphenylphosphine oxide*

**Physical Appearance:** Light Yellow solid (Mp: 182-184 °C)

**Yield:** 74% (39.2 mg)

**R<sub>f</sub>:** 0.40 (hexane/ethyl acetate, 7:3 v/v)

**<sup>1</sup>H NMR (400 MHz, CDCl<sub>3</sub>)** δ 8.46 (dt, *J* = 7.9, 1.7 Hz, 1H), 7.79 m, 2H), 7.51 – 7.34 (m, 6H), 7.28 (m, 3H), 7.28 – 7.17 (m, 1H), 7.14 (d, *J* = 1.8 Hz, 2H), 7.12 – 7.04 (m, 1H), 5.30 (d, *J* = 9.4 Hz, 1H), 5.09 (s, 1H), 1.45 – 1.22 (m, 18H).

**<sup>13</sup>C NMR (101 MHz, CDCl<sub>3</sub>)** δ 153.0 (d, *J*<sub>c-p</sub> = 2.2 Hz), 136.2, 135.6, 134.1 (d, *J*<sub>c-p</sub> = 10.4 Hz), 133.1 (d, *J*<sub>c-p</sub> = 100.9 Hz), 132.2 (d, *J*<sub>c-p</sub> = 96.1 Hz), 131.7 (d, *J*<sub>c-p</sub> = 2.7 Hz), 131.4, 131.35 (d, *J*<sub>c-p</sub> = 5.3 Hz), 131.26 (d, *J*<sub>c-p</sub> = 5.0 Hz), 129.5, 128.5 (d, *J*<sub>c-p</sub> = 11.4 Hz), 128.2, 128.1, 128.0, 127.3, 127.2 (d, *J*<sub>c-p</sub> = 5.8 Hz), 125.1 (d, *J*<sub>c-p</sub> = 5.4 Hz), 48.1 (d, *J*<sub>c-p</sub> = 67.7 Hz), 34.3, 30.3.

**<sup>31</sup>P NMR (162 MHz, CDCl<sub>3</sub>)** δ 32.68.

**HRMS (ESI-TOF) m/z:** [M + Na]<sup>+</sup> Calcd. for C<sub>33</sub>H<sub>36</sub>ClNaO<sub>2</sub>P 553.2034; Found 553.2013.

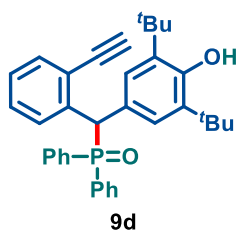

*((3,5-di-tert-butyl-4-hydroxyphenyl)(2-ethynylphenyl)methyl)diphenylphosphine oxide*

**Physical Appearance:** Yellow sticky solid

**Yield:** 69% (35.9 mg)

**R<sub>f</sub>:** 0.40 (hexane/ethyl acetate, 7:3 v/v)

**<sup>1</sup>H NMR (400 MHz, CDCl<sub>3</sub>)** δ 8.41 (dt, *J* = 8.0, 1.4 Hz, 1H), 7.83 (m, 2H), 7.53 – 7.44 (m, 2H), 7.38 (m, 5H), 7.32 – 7.26 (m, 3H), 7.22 (d, *J* = 1.8 Hz, 2H), 7.10 (m, 1H), 5.46 (d, *J* = 9.0 Hz, 1H), 5.10 (s, 1H), 3.43 (s, 1H), 1.34 (s, 18H).

**<sup>13</sup>C NMR (101 MHz, CDCl<sub>3</sub>)** δ 152.9 (d, *J*<sub>c-p</sub> = 2.4 Hz), 140.8 (d, *J*<sub>c-p</sub> = 2.5 Hz), 135.5 (d, *J*<sub>c-p</sub> = 1.7 Hz), 133.3 (d, *J*<sub>c-p</sub> = 100.1 Hz), 133.0, 132.2 (d, *J*<sub>c-p</sub> = 96.1 Hz), 131.5 (d, *J*<sub>c-p</sub> = 2.7 Hz), 131.29, 131.28 (d, *J*<sub>c-p</sub> = 17.0 Hz), 131.2 (d, *J*<sub>c-p</sub> = 2.8 Hz), 129.6 (d, *J*<sub>c-p</sub> = 5.2 Hz), 129.5, 128.4 (d, *J*<sub>c-p</sub> = 11.3 Hz), 128.0 (d, *J*<sub>c-p</sub> = 11.7 Hz), 127.1 (d, *J*<sub>c-p</sub> = 5.9 Hz), 126.7, 126.0 (d, *J*<sub>c-p</sub> = 5.5 Hz), 122.1 (d, *J*<sub>c-p</sub> = 9.9 Hz), 82.7, 81.9, 49.5 (d, *J*<sub>c-p</sub> = 67.5 Hz), 34.3, 30.3.

**<sup>31</sup>P NMR (162 MHz, CDCl<sub>3</sub>)** δ 32.66.

**HRMS (ESI-TOF) m/z:** [M + H]<sup>+</sup> Calcd. for C<sub>35</sub>H<sub>38</sub>O<sub>2</sub>P 521.2604; Found 521.2588.

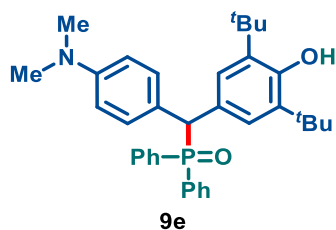

*((3,5-di-tert-butyl-4-hydroxyphenyl)(4-(dimethylamino)phenyl)methyl)diphenylphosphine oxide*

**Physical Appearance:** White solid (Mp: 210-212 °C)

**Yield:** 78% (42.0 mg)

**R<sub>f</sub>:** 0.35 (hexane/ethyl acetate, 7:3 v/v)

**<sup>1</sup>H NMR (400 MHz, CDCl<sub>3</sub>)** δ 7.76 – 7.67 (m, 2H), 7.50 – 7.38 (m, 5H), 7.35 (m, 3H), 7.26 (m, 2H), 7.06 (d, *J* = 1.9 Hz, 2H), 6.60 (d, *J* = 8.9 Hz, 1H), 5.00 (s, 1H), 4.57 (d, *J* = 10.4 Hz, 1H), 2.86 (s, 6H), 1.89 (s, 1H), 1.29 (s, 18H).

**<sup>13</sup>C NMR (101 MHz, CDCl<sub>3</sub>)** δ 152.6 (d, *J*<sub>c-p</sub> = 2.7 Hz), 149.5, 135.4 (d, *J*<sub>c-p</sub> = 1.7 Hz), 133.7 (d, *J*<sub>c-p</sub> = 65.7 Hz), 132.8 (d, *J*<sub>c-p</sub> = 64.0 Hz), 131.7 (d, *J*<sub>c-p</sub> = 8.4 Hz), 131.5 (d, *J*<sub>c-p</sub> = 8.6 Hz), 131.3 (d, *J*<sub>c-p</sub> = 2.7 Hz), 131.0 (d, *J*<sub>c-p</sub> = 2.7 Hz), 130.6 (d, *J*<sub>c-p</sub> = 7.2 Hz), 128.3 (d, *J*<sub>c-p</sub> = 11.3 Hz), 127.9 (d, *J*<sub>c-p</sub> = 11.5 Hz), 127.5 (d, *J*<sub>c-p</sub> = 4.9 Hz), 126.7 (d, *J*<sub>c-p</sub> = 6.0 Hz), 125.5 (d, *J*<sub>c-p</sub> = 3.9 Hz), 112.9, 52.8 (d, *J*<sub>c-p</sub> = 66.5 Hz), 40.7, 34.3, 30.3.

**<sup>31</sup>P NMR (162 MHz, CDCl<sub>3</sub>)** δ 31.43.

**HRMS (ESI-TOF) m/z:** [M + H]<sup>+</sup> Calcd. for C<sub>35</sub>H<sub>43</sub>NO<sub>2</sub>P 540.3026; Found 540.3011.

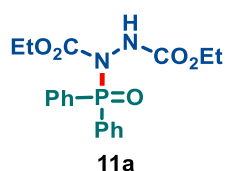

***diethyl 1-(diphenylphosphoryl)hydrazine-1,2-dicarboxylate***

**Physical Appearance:** White solid (Mp: 158-162 °C)

**Yield:** 74% (27.8 mg)

**R<sub>f</sub>:** 0.2 (hexane/ethyl acetate, 7:3 v/v)

**<sup>1</sup>H NMR (400 MHz, CDCl<sub>3</sub>)** δ 8.22 (dd, *J* = 13.0, 6.8 Hz, 2H), 7.87 (dd, *J* = 12.9, 7.2 Hz, 2H), 7.63 – 7.54 (m, 2H), 7.53 – 7.46 (m, 3H), 7.40 m, 2H), 4.11 – 4.01 (m, 4H), 1.11 (t, *J* = 7.1 Hz, 3H), 0.84 (t, *J* = 7.2 Hz, 3H).

**<sup>13</sup>C NMR (101 MHz, CDCl<sub>3</sub>)** δ 156.4, 155.0 (d, *J*<sub>c-p</sub> = 11.5 Hz), 132.5, 132.4, 132.14 (d, *J*<sub>c-p</sub> = 10.3 Hz), 132.09 (d, *J*<sub>c-p</sub> = 10.3 Hz), 130.4, 129.9, 128.7 (d, *J*<sub>c-p</sub> = 13.9 Hz), 128.2 (d, *J*<sub>c-p</sub> = 13.5 Hz), 63.7, 62.3, 14.5, 13.7.

**<sup>31</sup>P NMR (162 MHz, CDCl<sub>3</sub>)** δ 32.45.

**HRMS (ESI-TOF) m/z:** [M + Na]<sup>+</sup> Calcd. for C<sub>18</sub>H<sub>21</sub>N<sub>2</sub>NaO<sub>5</sub>P 399.1080; Found 399.1059.

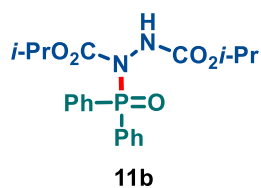

***diisopropyl 1-(diphenylphosphoryl)hydrazine-1,2-dicarboxylate***

**Physical Appearance:** White solid (Mp: 205-208 °C)

**Yield:** 89% (35.9 mg)

**R<sub>f</sub>:** 0.2 (hexane/ethyl acetate, 7:3 v/v)

**<sup>1</sup>H NMR (400 MHz, CDCl<sub>3</sub>)** δ 8.25 (dd, *J* = 12.9, 6.5 Hz, 2H), 7.87 (dd, *J* = 12.8, 7.2 Hz, 2H), 7.64 – 7.42 (m, 4H), 7.41 – 7.28 (m, 3H), 4.90 – 4.71 (m, 2H), 1.17 (d, *J* = 6.3 Hz, 3H), 1.04 (d, *J* = 6.3 Hz, 3H), 0.98 (d, *J* = 6.3 Hz, 3H), 0.71 (d, *J* = 6.5 Hz, 3H).

**<sup>13</sup>C NMR (101 MHz, CDCl<sub>3</sub>)** δ 155.9, 154.5 (d, *J*<sub>c-p</sub> = 11.2 Hz), 132.3 (d, *J*<sub>c-p</sub> = 2.8 Hz), 132.2 (d, *J*<sub>c-p</sub> = 3.0 Hz), 132.1 (d, *J*<sub>c-p</sub> = 2.4 Hz), 132.0, 130.4 (d, *J*<sub>c-p</sub> = 75.6 Hz), 128.7, 128.6 (d, *J*<sub>c-p</sub> = 13.9 Hz), 128.2 (d, *J*<sub>c-p</sub> = 13.4 Hz), 72.2, 70.0, 21.85, 21.79, 21.5, 21.0.

**<sup>31</sup>P NMR (162 MHz, CDCl<sub>3</sub>)** δ 31.69.

**HRMS (ESI-TOF) m/z:** [M +Na]<sup>+</sup> Calcd. for C<sub>20</sub>H<sub>25</sub>N<sub>2</sub>NaO<sub>5</sub>P 427.1393; Found 427.1372.

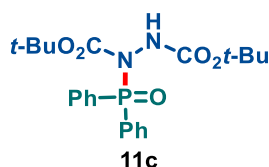

***di-tert-butyl 1-(diphenylphosphoryl)hydrazine-1,2-dicarboxylate***

**Physical Appearance:** White sticky solid

**Yield:** 89% (35.9 mg)

**R<sub>f</sub>:** 0.2 (hexane/ethyl acetate, 7:3 v/v)

**<sup>1</sup>H NMR (500 MHz, CDCl<sub>3</sub>)** δ 8.27 (dd, *J* = 13.0, 7.3 Hz, 2H), 7.85 (dd, *J* = 12.7, 7.7 Hz, 2H), 7.59 – 7.48 (m, 3H), 7.43 (t, *J* = 7.5 Hz, 1H), 7.35 (td, *J* = 7.7, 3.4 Hz, 2H), 6.64 (s, 1H), 1.30 (s, 9H), 1.13 (s, 9H).

**<sup>13</sup>C NMR (126 MHz, CDCl<sub>3</sub>)** δ 155.0, 153.4 (d, *J*<sub>c-p</sub> = 10.5 Hz), 132.1, 132.1 (d, *J*<sub>c-p</sub> = 2.9 Hz), 132.03 (d, *J*<sub>c-p</sub> = 132.7 Hz), 132.02, 131.9, 129.8 (d, *J*<sub>c-p</sub> = 131.4 Hz), 128.5 (d, *J*<sub>c-p</sub> = 13.7 Hz), 128.1 (d, *J*<sub>c-p</sub> = 13.4 Hz), 84.5, 81.5, 28.1, 27.6.

**<sup>31</sup>P NMR (162 MHz, CDCl<sub>3</sub>)** δ 31.11.

**HRMS (ESI-TOF) m/z:** [M +Na]<sup>+</sup> Calcd. for C<sub>22</sub>H<sub>29</sub>N<sub>2</sub>NaO<sub>5</sub>P 455.1706; Found 455.1698.

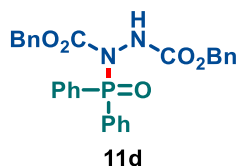

***dibenzyl 1-(diphenylphosphoryl)hydrazine-1,2-dicarboxylate***

**Physical Appearance:** White sticky solid

**Yield:** 82% (41.0 mg)

**R<sub>f</sub>:** 0.2 (hexane/ethyl acetate, 7:3 v/v)

**<sup>1</sup>H NMR (400 MHz, CDCl<sub>3</sub>)** δ 8.33 (s, 1H), 8.21 – 8.11 (m, 2H), 7.89 – 7.79 (m, 2H), 7.55 – 7.47 (m, 1H), 7.46 – 7.37 (m, 3H), 7.34 – 7.25 (m, 5H), 7.24 – 7.10 (m, 5H), 6.94 (d, *J* = 7.6 Hz, 2H), 5.16 – 4.94 (m, 4H).

**<sup>13</sup>C NMR (101 MHz, CDCl<sub>3</sub>)** δ 156.3, 155.0 (d, *J*<sub>c-p</sub> = 11.6 Hz), 135.8, 134.5, 132.4 (d, *J*<sub>c-p</sub> = 2.8 Hz), 132.3 (d, *J*<sub>c-p</sub> = 3.0 Hz), 132.0 (d, *J*<sub>c-p</sub> = 10.5 Hz), 132.0 (d, *J*<sub>c-p</sub> = 10.7 Hz), 130.4 (d, *J*<sub>c-p</sub> = 131.6 Hz), 128.9 (d, *J*<sub>c-p</sub> = 131.2 Hz), 128.6 (d, *J*<sub>c-p</sub> = 14.0 Hz), 128.4 (d, *J*<sub>c-p</sub> = 15.7 Hz), 128.2 (d, *J*<sub>c-p</sub> = 13.3 Hz), 128.1, 128.0, 127.7, 69.2, 67.4.

**<sup>31</sup>P NMR (162 MHz, CDCl<sub>3</sub>)** δ 33.07.

**HRMS (ESI-TOF) m/z:** [M +Na]<sup>+</sup> Calcd. for C<sub>28</sub>H<sub>25</sub>N<sub>2</sub>NaO<sub>5</sub>P 523.1393; Found 523.1378.

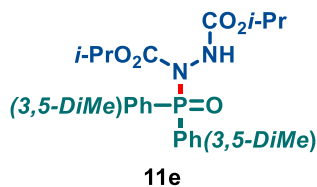

***diisopropyl 1-(bis(3,5-dimethylphenyl)phosphoryl)hydrazine-1,2-dicarboxylate***

**Physical Appearance:** Light yellow sticky solid

**Yield:** 86% (39.6 mg)

**R<sub>f</sub>:** 0.3 (hexane/ethyl acetate, 7:3 v/v)

**<sup>1</sup>H NMR (400 MHz, CDCl<sub>3</sub>)** δ 7.78 (d, *J* = 13.1 Hz, 2H), 7.47 (d, *J* = 13.1 Hz, 2H), 7.14 (s, 1H), 7.07 (s, 1H), 6.89 (s, 1H), 4.83 (m, 2H), 2.34 (s, 6H), 2.26 (s, 6H), 1.18 (d, *J* = 6.3 Hz, 3H), 1.04 (dd, *J* = 8.4, 6.1 Hz, 6H), 0.78 (d, *J* = 6.3 Hz, 3H).

**<sup>13</sup>C NMR (101 MHz, CDCl<sub>3</sub>)** δ 155.7, 154.6 (d, *J*<sub>c-p</sub> = 11.1 Hz), 138.2 (d, *J*<sub>c-p</sub> = 14.6 Hz), 137.8 (d, *J*<sub>c-p</sub> = 14.2 Hz), 134.1, 133.8 (d, *J*<sub>c-p</sub> = 3.1 Hz), 131.3 (d, *J*<sub>c-p</sub> = 129.1 Hz), 129.5 (d, *J*<sub>c-p</sub> = 10.4 Hz), 129.2 (d, *J*<sub>c-p</sub> = 129.1 Hz), 72.0, 69.9, 21.9, 21.7, 21.5, 21.4, 21.3, 21.0.

<sup>31</sup>P NMR (162 MHz, CDCl<sub>3</sub>) δ 32.83.

HRMS (ESI-TOF) m/z: [M +Na]<sup>+</sup> Calcd. for C<sub>24</sub>H<sub>33</sub>N<sub>2</sub>NaO<sub>5</sub>P 483.2019; Found 483.2007.

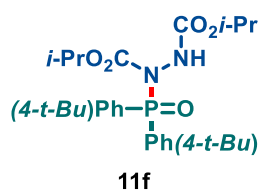

*diisopropyl 1-(bis(4-(tert-butyl)phenyl)phosphoryl)hydrazine-1,2-dicarboxylate*

**Physical Appearance:** Colourless sticky solid

**Yield:** 74% (38.2 mg)

**R<sub>f</sub>:** 0.2 (hexane/ethyl acetate, 7:3 v/v)

<sup>1</sup>H NMR (400 MHz, CDCl<sub>3</sub>) δ 8.17 (dd, *J* = 12.5, 8.1 Hz, 2H), 7.80 (dd, *J* = 12.4, 8.1 Hz, 2H), 7.51 (dd, *J* = 8.4, 3.3 Hz, 2H), 7.43 – 7.36 (m, 2H), 7.16 – 6.97 (m, 1H), 4.88 – 4.72 (m, 2H), 1.31 (s, 9H), 1.25 (s, 9H), 1.17 (d, *J* = 6.3 Hz, 3H), 1.05 (dd, *J* = 6.3, 2.1 Hz, 3H), 0.96 (dd, *J* = 6.2, 1.4 Hz, 3H), 0.66 (d, *J* = 6.1 Hz, 3H).

<sup>13</sup>C NMR (101 MHz, CDCl<sub>3</sub>) δ 155.7, 154.6 (d, *J*<sub>c-p</sub> = 11.0 Hz), 132.1 (d, *J*<sub>c-p</sub> = 4.8 Hz), 132.0 (d, *J*<sub>c-p</sub> = 4.7 Hz), 128.2 (d, *J*<sub>c-p</sub> = 134.3 Hz), 126.9, 125.5 (d, *J*<sub>c-p</sub> = 13.9 Hz), 125.2 (d, *J*<sub>c-p</sub> = 13.5 Hz), 72.0, 69.9, 35.1, 35.0, 31.2, 31.1, 21.9, 21.8, 21.6, 20.8.

<sup>31</sup>P NMR (162 MHz, CDCl<sub>3</sub>) δ 32.70.

HRMS (ESI-TOF) m/z: [M]<sup>+</sup> Calcd. for C<sub>30</sub>H<sub>56</sub>N<sub>2</sub>O<sub>5</sub>P 555.3932; Found 555.3925.

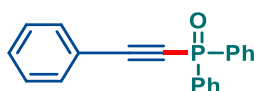

*diphenyl(phenylethynyl)phosphine oxide*

**Physical Appearance:** White solid (Mp: 100-102 °C)

**Yield:** 88% (26.6 mg)

**R<sub>f</sub>:** 0.5 (hexane/ethyl acetate, 7:3 v/v)

<sup>1</sup>H NMR (500 MHz, CDCl<sub>3</sub>) δ 7.90 (m, 4H), 7.58 (dd, *J* = 7.1, 1.8 Hz, 2H), 7.56 – 7.52 (m, 2H), 7.49 (m, 4H), 7.43 (m, 1H), 7.36 (m, 2H).

$^{13}\text{C}$  NMR (126 MHz,  $\text{CDCl}_3$ )  $\delta$  133.0 (d,  $J_{c-p} = 122.3$  Hz), 132.6 (d,  $J_{c-p} = 2.1$  Hz), 132.3 (d,  $J_{c-p} = 3.0$  Hz), 131.0 (d,  $J_{c-p} = 11.3$  Hz), 130.8, 128.8, 128.7 (d,  $J_{c-p} = 4.7$  Hz), 119.9 (d,  $J_{c-p} = 4.0$  Hz), 105.6 (d,  $J_{c-p} = 30.1$  Hz), 82.9 (d,  $J_{c-p} = 170.0$  Hz).

$^{31}\text{P}$  NMR (202 MHz,  $\text{CDCl}_3$ )  $\delta$  8.45.

HRMS (ESI-TOF)  $m/z$ :  $[\text{M} + \text{Na}]^+$  Calcd. for  $\text{C}_{20}\text{H}_{15}\text{NaOP}$  325.0753; Found 325.0745.

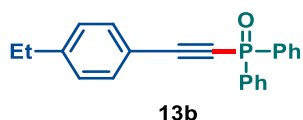

*((4-ethylphenyl)ethynyl)diphenylphosphine oxide*

**Physical Appearance:** Light Yellow solid (Mp: 100-101 °C)

**Yield:** 87% (28.7 mg)

**R<sub>f</sub>:** 0.5 (hexane/ethyl acetate, 7:3 v/v)

$^1\text{H}$  NMR (400 MHz,  $\text{CDCl}_3$ )  $\delta$  7.95 – 7.85 (m, 4H), 7.57 – 7.44 (m, 8H), 7.20 (d,  $J = 8.6$  Hz, 2H), 2.67 (q,  $J = 7.6$  Hz, 2H), 1.23 (t,  $J = 7.6$  Hz, 3H).

$^{13}\text{C}$  NMR (101 MHz,  $\text{CDCl}_3$ )  $\delta$  147.7, 133.3 (d,  $J_{c-p} = 122.2$  Hz), 132.7 (d,  $J_{c-p} = 2.0$  Hz), 132.3 (d,  $J_{c-p} = 3.0$  Hz), 131.1 (d,  $J_{c-p} = 11.4$  Hz), 128.7 (d,  $J_{c-p} = 13.5$  Hz), 128.3, 117.2, 106.2 (d,  $J_{c-p} = 30.6$  Hz), 82.3 (d,  $J_{c-p} = 171.9$  Hz), 29.1, 15.3.

$^{31}\text{P}$  NMR (162 MHz,  $\text{CDCl}_3$ )  $\delta$  8.38.

HRMS (ESI-TOF)  $m/z$ :  $[\text{M} + \text{Na}]^+$  Calcd. for  $\text{C}_{22}\text{H}_{19}\text{NaOP}$  353.1066; Found 353.1055.

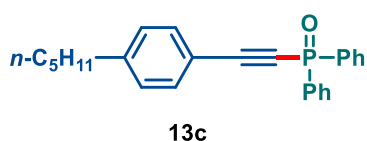

*((4-pentylphenyl)ethynyl)diphenylphosphine oxide*

**Physical Appearance:** Light yellow oil

**Yield:** 89% (26.8 mg)

**R<sub>f</sub>:** 0.5 (hexane/ethyl acetate, 7:3 v/v)

$^1\text{H}$  NMR (400 MHz,  $\text{CDCl}_3$ )  $\delta$  7.95 – 7.84 (m, 4H), 7.59 – 7.43 (m, 8H), 7.22 – 7.15 (m, 2H), 2.66 – 2.58 (m, 2H), 1.66 – 1.54 (m, 2H), 1.40 – 1.21 (m, 4H), 0.88 (t,  $J = 6.9$  Hz, 3H).



$^{13}\text{C}$  NMR (101 MHz,  $\text{CDCl}_3$ )  $\delta$  146.5, 133.3 (d,  $J_{c-p} = 122.1$  Hz), 132.6 (d,  $J_{c-p} = 2.0$  Hz), 132.3 (d,  $J_{c-p} = 3.0$  Hz), 131.1 (d,  $J_{c-p} = 11.3$  Hz), 128.8, 128.7, 117.1 (d,  $J_{c-p} = 4.0$  Hz), 106.2 (d,  $J_{c-p} = 30.6$  Hz), 82.3 (d,  $J_{c-p} = 172.0$  Hz), 36.1, 31.5, 30.9, 22.6, 14.1.

$^{31}\text{P}$  NMR (162 MHz,  $\text{CDCl}_3$ )  $\delta$  8.36.

HRMS (ESI-TOF)  $m/z$ :  $[\text{M} + \text{Na}]^+$  Calcd. for  $\text{C}_{25}\text{H}_{25}\text{NaOP}$  353.1066; Found 353.1055.

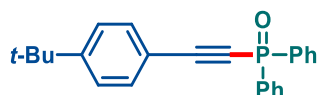

13d

*((4-(tert-butyl)phenyl)ethynyl)diphenylphosphine oxide*

**Physical Appearance:** Colourless oil

**Yield:** 88% (31.5 mg)

**$R_f$ :** 0.5 (hexane/ethyl acetate, 7:3 v/v)

$^1\text{H}$  NMR (400 MHz,  $\text{CDCl}_3$ )  $\delta$  7.96 – 7.85 (m, 4H), 7.57 – 7.43 (m, 8H), 7.42 – 7.38 (m, 2H), 1.31 (s, 9H).

$^{13}\text{C}$  NMR (126 MHz,  $\text{CDCl}_3$ )  $\delta$  154.6, 133.3 (d,  $J_{c-p} = 122.1$  Hz), 132.5 (d,  $J_{c-p} = 2.0$  Hz), 132.3 (d,  $J_{c-p} = 3.0$  Hz), 131.1 (d,  $J_{c-p} = 11.4$  Hz), 128.7 (d,  $J_{c-p} = 13.4$  Hz), 125.7, 116.9 (d,  $J_{c-p} = 4.0$  Hz), 106.2 (d,  $J_{c-p} = 30.6$  Hz), 82.3 (d,  $J_{c-p} = 172.0$  Hz), 35.2, 31.1.

$^{31}\text{P}$  NMR (162 MHz,  $\text{CDCl}_3$ )  $\delta$  8.45.

HRMS (ESI-TOF)  $m/z$ :  $[\text{M} + \text{Na}]^+$  Calcd. for  $\text{C}_{24}\text{H}_{23}\text{NaOP}$  381.1379; Found 381.1371.

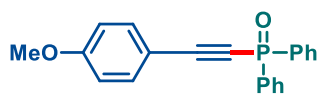

13e

*((4-methoxyphenyl)ethynyl)diphenylphosphine oxide*

**Physical Appearance:** Colourless oil

**Yield:** 83% (27.5 mg)

**$R_f$ :** 0.5 (hexane/ethyl acetate, 7:3 v/v)

$^1\text{H}$  NMR (500 MHz,  $\text{CDCl}_3$ )  $\delta$  7.90 (dd,  $J = 13.9, 7.4$  Hz, 4H), 7.54 (d,  $J = 8.5$  Hz, 4H), 7.52 – 7.45 (m, 4H), 6.88 (d,  $J = 8.7$  Hz, 2H), 3.83 (s, 3H).

$^{13}\text{C}$  NMR (126 MHz,  $\text{CDCl}_3$ )  $\delta$  161.6, 134.5 (d,  $J_{c-p} = 1.6$  Hz), 133.4 (d,  $J_{c-p} = 122.2$  Hz), 132.3 (d,  $J_{c-p} = 2.7$  Hz), 131.1 (d,  $J_{c-p} = 11.2$  Hz), 128.8 (d,  $J_{c-p} = 13.5$  Hz), 114.4, 111.9 (d,  $J_{c-p} = 4.6$  Hz), 106.3 (d,  $J_{c-p} = 31.0$  Hz), 81.8 (d,  $J_{c-p} = 173.3$  Hz), 55.6.

$^{31}\text{P}$  NMR (202 MHz,  $\text{CDCl}_3$ )  $\delta$  8.30.

HRMS (ESI-TOF) m/z:  $[\text{M} + \text{Na}]^+$  Calcd. for  $\text{C}_{21}\text{H}_{17}\text{NaOP}$  355.0858; Found 355.0848.

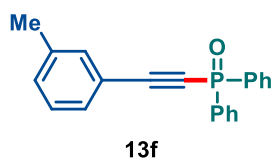

*diphenyl(m-tolylethynyl)phosphine oxide*

**Physical Appearance:** White sticky solid

**Yield:** 74% (27.5 mg)

**R<sub>f</sub>:** 0.5 (hexane/ethyl acetate, 7:3 v/v)

$^1\text{H}$  NMR (500 MHz,  $\text{CDCl}_3$ )  $\delta$  7.88 (m, 4H), 7.64 – 7.54 (m, 3H), 7.54 – 7.45 (m, 5H), 7.46 – 7.40 (m, 1H), 7.32 (d,  $J = 7.8$  Hz, 1H), 2.16 (s, 3H).

$^{13}\text{C}$  NMR (126 MHz,  $\text{CDCl}_3$ )  $\delta$  134.7, 132.8 (d,  $J_{c-p} = 122.4$  Hz), 132.6 (d,  $J_{c-p} = 2.9$  Hz), 132.3 (d,  $J_{c-p} = 2.1$  Hz), 131.1 (d,  $J_{c-p} = 11.4$  Hz), 130.8 (d,  $J_{c-p} = 1.9$  Hz), 130.0, 128.9 (d,  $J_{c-p} = 13.6$  Hz), 127.3 (d,  $J_{c-p} = 303.2$  Hz), 121.8 (d,  $J_{c-p} = 4.1$  Hz), 103.5 (d,  $J_{c-p} = 29.2$  Hz), 84.2 (d,  $J_{c-p} = 166.3$  Hz), 31.0.

$^{31}\text{P}$  NMR (202 MHz,  $\text{CDCl}_3$ )  $\delta$  8.46.

HRMS (ESI-TOF) m/z:  $[\text{M} + \text{Na}]^+$  Calcd. for  $\text{C}_{21}\text{H}_{17}\text{NaOP}$  339.0909; Found 339.0882.

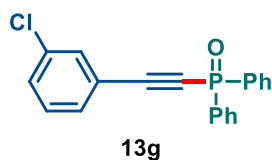

*((3-chlorophenyl)ethynyl)diphenylphosphine oxide*

**Physical Appearance:** Light yellow oil

**Yield:** 81% (27.2 mg)

**R<sub>f</sub>:** 0.5 (hexane/ethyl acetate, 7:3 v/v)

$^1\text{H NMR}$  (400 MHz,  $\text{CDCl}_3$ )  $\delta$  7.95 – 7.81 (m, 4H), 7.63 – 7.54 (m, 3H), 7.54 – 7.46 (m, 5H), 7.42 (m, 1H), 7.31 (t,  $J = 7.9$  Hz, 1H).

$^{13}\text{C NMR}$  (101 MHz,  $\text{CDCl}_3$ )  $\delta$  134.0 (d,  $J_{c-p} = 127.6$  Hz), 132.5 (d,  $J_{c-p} = 2.9$  Hz), 132.3 (d,  $J_{c-p} = 2.0$  Hz), 132.2, 131.2, 131.0, 130.8 (d,  $J_{c-p} = 2.0$  Hz), 130.0, 128.9 (d,  $J_{c-p} = 13.5$  Hz), 121.8 (d,  $J_{c-p} = 4.0$  Hz), 103.5 (d,  $J_{c-p} = 29.1$  Hz), 84.2 (d,  $J_{c-p} = 166.4$  Hz).

$^{31}\text{P NMR}$  (162 MHz,  $\text{CDCl}_3$ )  $\delta$  8.39.

**HRMS (ESI-TOF) m/z:**  $[\text{M} + \text{Na}]^+$  Calcd. for  $\text{C}_{20}\text{H}_{14}\text{ClNaOP}$  359.0363; Found 359.0355.

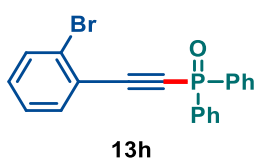

*((2-bromophenyl)ethynyl)diphenylphosphine oxide*

**Physical Appearance:** Colourless oil

**Yield:** 82% (31.1 mg)

**R<sub>f</sub>:** 0.5 (hexane/ethyl acetate, 7:3 v/v)

$^1\text{H NMR}$  (400 MHz,  $\text{CDCl}_3$ )  $\delta$  7.94 – 7.82 (m, 4H), 7.58 – 7.54 (m, 2H), 7.54 – 7.52 (m, 2H), 7.51 – 7.47 (m, 4H), 7.46 – 7.42 (m, 2H).

$^{13}\text{C NMR}$  (126 MHz,  $\text{CDCl}_3$ )  $\delta$  134.0 (d,  $J_{c-p} = 1.9$  Hz), 132.7 (d,  $J_{c-p} = 122.5$  Hz), 133.1, 132.5 (d,  $J_{c-p} = 2.8$  Hz), 132.1, 131.1 (d,  $J_{c-p} = 11.3$  Hz), 128.8 (d,  $J_{c-p} = 13.6$  Hz), 128.4, 125.6, 118.9 (d,  $J_{c-p} = 4.1$  Hz), 104.3 (d,  $J_{c-p} = 29.8$  Hz), 84.1 (d,  $J_{c-p} = 168.0$  Hz).

$^{31}\text{P NMR}$  (162 MHz,  $\text{CDCl}_3$ )  $\delta$  8.54.

**HRMS (ESI-TOF) m/z:**  $[\text{M} + \text{Na}]^+$  Calcd. for  $\text{C}_{20}\text{H}_{14}\text{ClNaOP}$  402.9858; Found 402.9851.

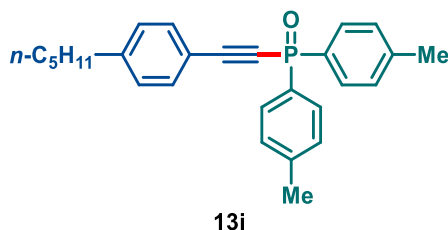

*((4-pentylphenyl)ethynyl)di-p-tolylphosphine oxide*

**Physical Appearance:** Colourless oil

**Yield:** 84% (33.6 mg)

**R<sub>f</sub>:** 0.5 (hexane/ethyl acetate, 7:3 v/v)

**<sup>1</sup>H NMR (500 MHz, CDCl<sub>3</sub>)** δ 7.77 (dd, *J* = 13.6, 8.1 Hz, 4H), 7.58 – 7.44 (m, 2H), 7.28 (dd, *J* = 8.1, 3.0 Hz, 4H), 7.17 (d, *J* = 8.0 Hz, 2H), 2.67 – 2.58 (m, 2H), 2.40 (s, 6H), 1.60 (p, *J* = 7.4 Hz, 2H), 1.31 (m, 4H), 0.88 (t, *J* = 7.0 Hz, 3H).

**<sup>13</sup>C NMR (126 MHz, CDCl<sub>3</sub>)** δ 146.3, 142.8 (d, *J*<sub>c-p</sub> = 2.8 Hz), 132.6 (d, *J*<sub>c-p</sub> = 2.0 Hz), 131.1 (d, *J*<sub>c-p</sub> = 11.6 Hz), 130.3 (d, *J*<sub>c-p</sub> = 124.6 Hz), 129.5 (d, *J*<sub>c-p</sub> = 13.9 Hz), 128.8, 117.3 (d, *J*<sub>c-p</sub> = 4.0 Hz), 105.7 (d, *J*<sub>c-p</sub> = 30.4 Hz), 82.7 (d, *J*<sub>c-p</sub> = 170.4 Hz), 36.1, 31.5, 30.9, 22.6, 21.8, 14.1.

**<sup>31</sup>P NMR (162 MHz, CDCl<sub>3</sub>)** δ 8.85.

**HRMS (ESI-TOF) m/z:** [M +Na]<sup>+</sup> Calcd. for C<sub>27</sub>H<sub>29</sub>NaOP 423.1848; Found 423.1834.

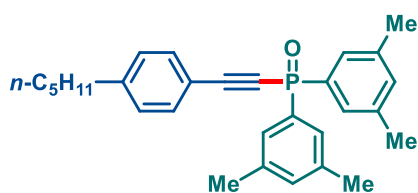

13j

**Physical Appearance:** Colourless oil

**Yield:** 68% (29.1 mg)

**R<sub>f</sub>:** 0.5 (hexane/ethyl acetate, 7:3 v/v)

**<sup>1</sup>H NMR (500 MHz, CDCl<sub>3</sub>)** δ 7.54 – 7.44 (m, 6H), 7.25 – 7.14 (m, 4H), 2.75 – 2.56 (m, 2H), 2.35 (s, 12H), 1.65 – 1.55 (m, 2H), 1.31 (m, 4H), 0.88 (t, *J* = 6.9 Hz, 3H).

**<sup>13</sup>C NMR (126 MHz, CDCl<sub>3</sub>)** δ 146.2, 138.4 (d, *J*<sub>c-p</sub> = 14.2 Hz), 134.0 (d, *J*<sub>c-p</sub> = 2.9 Hz), 133.1 (d, *J*<sub>c-p</sub> = 120.7 Hz), 132.6 (d, *J*<sub>c-p</sub> = 2.0 Hz), 128.7 (d, *J*<sub>c-p</sub> = 14.9 Hz), 128.6, 117.4 (d, *J*<sub>c-p</sub> = 4.2 Hz), 105.6 (d, *J*<sub>c-p</sub> = 29.9 Hz), 82.8 (d, *J*<sub>c-p</sub> = 169.4 Hz), 36.1, 31.5, 30.9, 22.6, 21.4, 14.1.

**<sup>31</sup>P NMR (162 MHz, CDCl<sub>3</sub>)** δ 9.20.

**HRMS (ESI-TOF) m/z:** [M +H]<sup>+</sup> Calcd. for C<sub>29</sub>H<sub>34</sub>OP 429.2342; Found 429.2366.

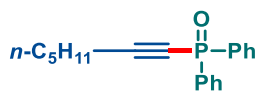

13k

**hept-1-yn-1-ylidiphenylphosphine oxide**

**Physical Appearance:** Colourless oil

**Yield:** 84% (24.9 mg)

**R<sub>f</sub>:** 0.6 (hexane/ethyl acetate, 7:3 v/v)

**<sup>1</sup>H NMR (400 MHz, CDCl<sub>3</sub>)** δ 7.82 (m, 4H), 7.59 – 7.37 (m, 6H), 2.44 (td, *J* = 7.2, 3.6 Hz, 2H), 1.63 (p, *J* = 7.2 Hz, 2H), 1.45 – 1.27 (m, 4H), 0.88 (t, *J* = 7.1 Hz, 3H).

**<sup>13</sup>C NMR (101 MHz, CDCl<sub>3</sub>)** δ 133.5 (d, *J*<sub>c-p</sub> = 121.9 Hz), 132.2 (d, *J*<sub>c-p</sub> = 2.9 Hz), 131.0 (d, *J*<sub>c-p</sub> = 11.3 Hz), 128.7 (d, *J*<sub>c-p</sub> = 13.3 Hz), 110.1 (d, *J*<sub>c-p</sub> = 30.7 Hz), 74.9 (d, *J*<sub>c-p</sub> = 175.6 Hz), 31.1, 27.4 (d, *J*<sub>c-p</sub> = 1.8 Hz), 22.2, 19.9 (d, *J*<sub>c-p</sub> = 3.2 Hz), 14.0.

**<sup>31</sup>P NMR (162 MHz, CDCl<sub>3</sub>)** δ 8.27.

**HRMS (ESI-TOF) m/z:** [M +Na]<sup>+</sup> Calcd. for C<sub>19</sub>H<sub>21</sub>NaOP 319.1222; Found 319.1213.

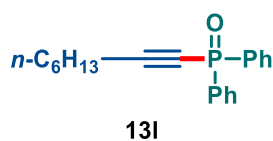

***oct-1-yn-1-yl*diphenylphosphine oxide**

**Physical Appearance:** Colourless oil

**Yield:** 84% (19.0 mg)

**R<sub>f</sub>:** 0.6 (hexane/ethyl acetate, 7:3 v/v)

**<sup>1</sup>H NMR (500 MHz, CDCl<sub>3</sub>)** δ 7.82 (m, 4H), 7.52 (m, 2H), 7.45 (m, 4H), 2.44 (td, *J* = 7.1, 3.5 Hz, 2H), 1.62 (q, *J* = 7.2 Hz, 2H), 1.46 – 1.36 (m, 2H), 1.32 – 1.26 (m, 4H), 0.89 – 0.85 (m, 3H).

**<sup>13</sup>C NMR (126 MHz, CDCl<sub>3</sub>)** δ 133.6 (d, *J*<sub>c-p</sub> = 121.7 Hz), 132.1 (d, *J*<sub>c-p</sub> = 2.9 Hz), 131.0 (d, *J*<sub>c-p</sub> = 11.3 Hz), 128.6 (d, *J*<sub>c-p</sub> = 13.5 Hz), 110.0 (d, *J*<sub>c-p</sub> = 30.7 Hz), 75.0 (d, *J*<sub>c-p</sub> = 175.3 Hz), 31.3, 28.6, 27.6 (d, *J*<sub>c-p</sub> = 1.8 Hz), 22.6, 19.9 (d, *J*<sub>c-p</sub> = 3.1 Hz), 14.1.

**<sup>31</sup>P NMR (202 MHz, CDCl<sub>3</sub>)** δ 7.61.

**HRMS (ESI-TOF) m/z:** [M +Na]<sup>+</sup> Calcd. for C<sub>20</sub>H<sub>23</sub>NaOP 333.1379; Found 333.1368.

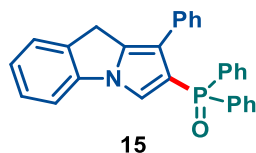

***diphenyl(1-phenyl-9H-pyrrolo[1,2-a]indol-2-yl)*phosphine oxide**

**Physical Appearance:** Light Yellow solid (Mp: 261-264 °C)

**Yield:** 63% (27.1 mg)

**R<sub>f</sub>:** 0.25 (hexane/ethyl acetate, 7:3 v/v)

**<sup>1</sup>H NMR (400 MHz, CDCl<sub>3</sub>)** δ 7.75 (dd, *J* = 12.2, 7.0 Hz, 4H), 7.59 (d, *J* = 7.2 Hz, 2H), 7.42 (t, *J* = 7.3 Hz, 3H), 7.34 (td, *J* = 7.6, 2.7 Hz, 4H), 7.29 (d, *J* = 7.6 Hz, 1H), 7.23 (d, *J* = 7.7 Hz, 1H), 7.16 (dt, *J* = 10.8, 7.5 Hz, 3H), 7.04 (t, *J* = 7.4 Hz, 1H), 6.96 (d, *J* = 4.0 Hz, 1H), 4.02 (s, 2H).

**<sup>13</sup>C NMR (101 MHz, CDCl<sub>3</sub>)** δ 139.8, 135.5 (d, *J*<sub>c-p</sub> = 11.0 Hz), 134.6, 134.3, 133.2, 132.0 (d, *J*<sub>c-p</sub> = 10.0 Hz), 131.4 (d, *J*<sub>c-p</sub> = 2.6 Hz), 128.8, 128.2 (d, *J*<sub>c-p</sub> = 12.1 Hz), 128.1, 127.8, 126.31, 126.26, 124.8, 122.0 (d, *J*<sub>c-p</sub> = 8.6 Hz), 119.5 (d, *J*<sub>c-p</sub> = 21.6 Hz), 117.3 (d, *J*<sub>c-p</sub> = 119.5 Hz), 110.7, 29.7.

**<sup>31</sup>P NMR (202 MHz, CDCl<sub>3</sub>)** δ 21.79.

**HRMS (ESI-TOF) m/z:** [M + H]<sup>+</sup> Calcd. for C<sub>29</sub>H<sub>23</sub>NOP 432.1512; Found 432.1496.

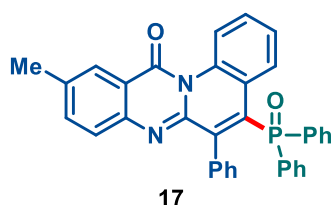

***5-(diphenylphosphoryl)-10-methyl-6-phenyl-12H-quinolino[2,1-b]quinazolin-12-one***

**Physical Appearance:** Yellow sticky solid

**Yield:** 78% (41.8 mg)

**R<sub>f</sub>:** 0.45 (hexane/ethyl acetate, 7:3 v/v)

**<sup>1</sup>H NMR (500 MHz, CDCl<sub>3</sub>)** δ 8.96 (d, *J* = 8.7 Hz, 1H), 8.26 (s, 1H), 8.02 (d, *J* = 8.1 Hz, 1H), 7.55 (dd, *J* = 8.4, 2.2 Hz, 1H), 7.49 – 7.37 (m, 6H), 7.24 (dd, *J* = 7.5, 1.7 Hz, 1H), 7.21 – 7.09 (m, 8H), 7.01 (t, *J* = 7.7 Hz, 2H), 2.54 (s, 3H).

**<sup>13</sup>C NMR (126 MHz, CDCl<sub>3</sub>)** δ 162.6, 146.9 (d, *J*<sub>c-p</sub> = 8.1 Hz), 146.5 (d, *J*<sub>c-p</sub> = 15.5 Hz), 144.3 (d, *J*<sub>c-p</sub> = 1.5 Hz), 138.0, 136.2, 135.6 (d, *J*<sub>c-p</sub> = 98.9 Hz), 135.5 (d, *J*<sub>c-p</sub> = 6.1 Hz), 134.7 (d, *J*<sub>c-p</sub> = 106.1 Hz), 133.7 (d, *J*<sub>c-p</sub> = 8.4 Hz), 132.9, 131.0 (d, *J*<sub>c-p</sub> = 9.4 Hz), 130.8 (d, *J*<sub>c-p</sub> = 2.7 Hz), 129.0 (d, *J*<sub>c-p</sub> = 5.9 Hz), 128.9, 128.3 (d, *J*<sub>c-p</sub> = 12.4 Hz), 128.2 (d, *J*<sub>c-p</sub> = 11.7 Hz), 127.3, 126.6, 125.7, 125.0 (d, *J*<sub>c-p</sub> = 9.3 Hz), 120.8, 120.2, 21.7.

**<sup>31</sup>P NMR (202 MHz, CDCl<sub>3</sub>)** δ 24.25.

**HRMS (ESI-TOF) m/z:** [M + H]<sup>+</sup> Calcd. for C<sub>35</sub>H<sub>26</sub>N<sub>2</sub>O<sub>2</sub>P 537.1726; Found 537.1711.

## 10. References

- 1) J. Wang, Y. Zhou, L. Zhang, Z. Li, X. Chen and H. Liu, *Org. Lett.*, 2013, **15**, 1508–1511.
- 2) O. Kaumanns, R. Lucius and H. Mayr, *Chemistry*, 2008, **14**, 9675–9682.
- 3) Y. Hu, Y.-H. He and Z. Guan, *Catal. Commun.*, 2010, **11**, 656–659.
- 4) Y. Chen, Y. You and Z. Weng, *Org. Chem. Front.*, 2019, **6**, 213–217.
- 5) K. Okuro and H. Alper, *J. Org. Chem.*, 2012, **77**, 4420–4424.
- 6) H. Yang, W. Zhang and Q. Liu, *ChemistrySelect*, 2019, **4**, 10819–10827.
- 7) M. Tavakolian and M. M. Najafpour, *New J Chem*, 2019, **43**, 16437–16440.
- 8) Y. Zhou, C.-F. Gao, H. Ma, J. Nie, J.-A. Ma and F.-G. Zhang, *Chem. Asian J.*, 2022, **17**, e202200436.
- 9) Y. Li, H. Zhang, R. Wei and Z. Miao, *Adv. Synth. Catal.*, 2017, **359**, 4158–4164.
- 10) Sonam, V. N. Shinde and A. Kumar, *J. Org. Chem.*, 2022, **87**, 2651–2661.
- 11) A. G. Burra, D. Uredi, D. R. Motati, F. R. Fronczek and E. B. Watkins, *European J. Org. Chem.*, 2022, e202200191.
- 12) A. S. Jadhav, Y. A. Pankhade and R. Vijaya Anand, *J. Org. Chem.*, 2018, **83**, 8615–8626.
- 13) L. Roiser and M. Waser, *Org. Lett.*, 2017, **19**, 2338–2341.
- 14) D. J. Fansher and D. R. J. Palmer, *Angew. Chem. Int. Ed.*, 2023, **62**, e202214539.
- 15) H. Ruan, L.-G. Meng, H. Xu, Y. Liang and L. Wang, *Org. Biomol. Chem.*, 2020, **18**, 1087–1090.
- 16) Y.-S. Feng, Z.-Q. Xu, L. Mao, F.-F. Zhang and H.-J. Xu, *Org. Lett.*, 2013, **15**, 1472–1475.
- 17) Z.-C. Miao, D. Wang, Y.-M. Zhang, Z.-K. Jin, F. Liu, F.-F. Wang and H. Yang, *Liq. Cryst.*, 2012, **39**, 1291–1296.
- 18) N. V. S. D. K. Bhupathiraju, M. Sayeedi, W. Rizvi, S. Singh, J. D. Batteas and C. Michael Drain, *Tetrahedron Lett.*, 2018, **59**, 3629–3631.

- 19) A. Verlee, T. Heugebaert, T. van der Meer, P. Kerchev, K. Van Hecke, F. Van Breusegem and C. V. Stevens, *ACS Catal.*, 2019, **9**, 7862–7869.
- 20) J. Wu, B. Qian, Y. Liu and Y. Shang, *ChemistrySelect*, 2020, **5**, 10269–10275.
- 21) F.-L. Zeng, Z.-Y. Zhang, P.-C. Yin, F.-K. Cheng, X.-L. Chen, L.-B. Qu, Z.-Y. Cao and B. Yu, *Org. Lett.*, 2022, **24**, 7912–7917.
- 22) Y. Chen, Z. Yu, Z. Jiang, J.-P. Tan, J.-H. Wu, Y. Lan, X. Ren and T. Wang, *ACS Catal.*, 2021, **11**, 14168–14180.
- 23) M. A. Cismesia and T. P. Yoon, *Chem. Sci.*, 2015, **6**, 5426–5434.
- 24) C.-G. Hatchard and C.-A. Parker, *Proc. R. Soc. Lond.*, 1956, **235**, 518–536.
- 25) H.-J. Kuhn, S.-E. Braslavsky and R. Schmidt, *Pure Appl. Chem.*, 2004, **76**, 2105–2146.



## 11. X-ray Crystallography data for the compound

Single crystals of all compounds were mounted on a Cryoloop with a drop of Paratone oil and positioned in the cold nitrogen stream on a Rigaku Saturn724+ (2x2 bin mode) diffractometer for **5a**, **7c** and **9b**. The data collections were performed at 150 K using a graphite monochromated MoK $\alpha$  ( $\lambda = 0.71073$ ) radiation source for compounds 7 and 51. The data were reduced using CrysAlisPro Red 171.41\_64.93a software. The structures were solved using Olex21 with the ShelXT2 structure solution program using intrinsic phasing and refined with the SHELXL3 refinement package using least-squares minimization. These data can be obtained free of charge from The Cambridge Crystallographic Data Centre via [www.ccdc.cam.ac.uk/data\\_request/cif](http://www.ccdc.cam.ac.uk/data_request/cif).

### a. X-ray Crystallography data for the compound of **5a**

Crystal of the compound **5a** was obtained after slow evaporation of chloroform solvent. Molecular structure of **5a** with 50% ellipsoid probability.

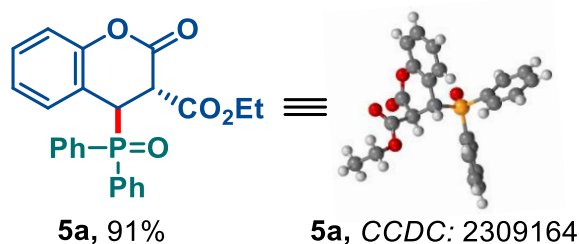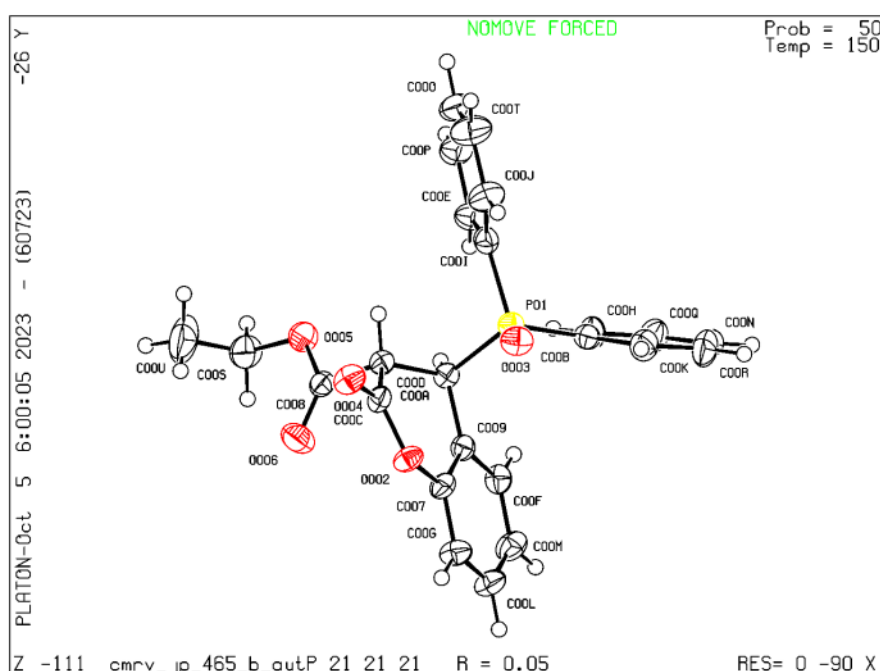

**Figure S12.** Molecular structure of **5a** with 50% ellipsoid probability.

| <b>Table 1 Crystal data and structure refinement for<br/>CMRV_JP_465_B_autored.</b> |                                                               |
|-------------------------------------------------------------------------------------|---------------------------------------------------------------|
| Identification code                                                                 | CMRV_JP_465_B_autored                                         |
| Empirical formula                                                                   | C <sub>24</sub> H <sub>21</sub> O <sub>5</sub> P              |
| Formula weight                                                                      | 420.38                                                        |
| Temperature/K                                                                       | 150.00(10)                                                    |
| Crystal system                                                                      | orthorhombic                                                  |
| Space group                                                                         | P2 <sub>1</sub> 2 <sub>1</sub> 2 <sub>1</sub>                 |
| a/Å                                                                                 | 8.7082(5)                                                     |
| b/Å                                                                                 | 11.7522(5)                                                    |
| c/Å                                                                                 | 20.0325(12)                                                   |
| α/°                                                                                 | 90                                                            |
| β/°                                                                                 | 90                                                            |
| γ/°                                                                                 | 90                                                            |
| Volume/Å <sup>3</sup>                                                               | 2050.14(19)                                                   |
| Z                                                                                   | 4                                                             |
| ρ <sub>calc</sub> /cm <sup>3</sup>                                                  | 1.362                                                         |
| μ/mm <sup>-1</sup>                                                                  | 0.168                                                         |
| F(000)                                                                              | 880.0                                                         |
| Crystal size/mm <sup>3</sup>                                                        | 0.0875 × 0.0652 × 0.0367                                      |
| Radiation                                                                           | MoKα (λ = 0.71073)                                            |
| 2θ range for data collection/°                                                      | 4.018 to 49.978                                               |
| Index ranges                                                                        | -10 ≤ h ≤ 10, -13 ≤ k ≤ 13, -23 ≤ l ≤ 23                      |
| Reflections collected                                                               | 19704                                                         |
| Independent reflections                                                             | 3612 [R <sub>int</sub> = 0.1058, R <sub>sigma</sub> = 0.0677] |
| Data/restraints/parameters                                                          | 3612/0/272                                                    |
| Goodness-of-fit on F <sup>2</sup>                                                   | 0.881                                                         |
| Final R indexes [I ≥ 2σ (I)]                                                        | R <sub>1</sub> = 0.0525, wR <sub>2</sub> = 0.1323             |
| Final R indexes [all data]                                                          | R <sub>1</sub> = 0.0616, wR <sub>2</sub> = 0.1491             |
| Largest diff. peak/hole / e Å <sup>-3</sup>                                         | 0.33/-0.36                                                    |
| Flack parameter                                                                     | 0.09(11)                                                      |

**b. X-ray Crystallography data for the compound of 7c**

Crystal of the compound **7c** was obtained after slow evaporation of chloroform solvent.

Molecular structure of **7c** with 50% ellipsoid probability.

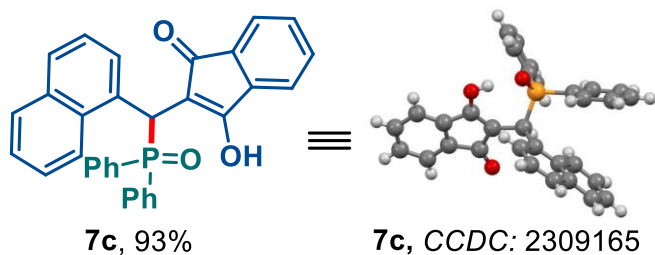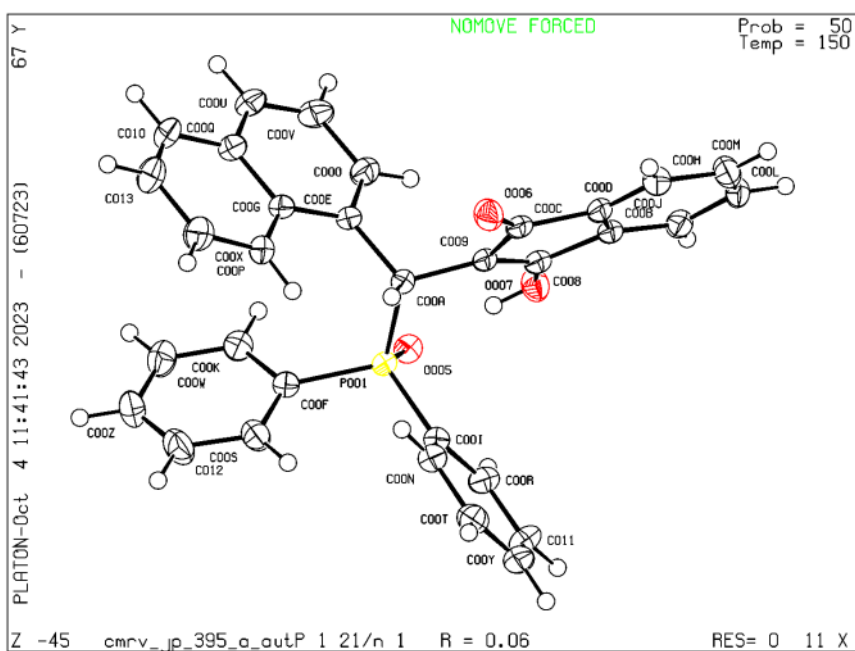

**Figure S13.** Molecular structure of **7c** with 50% ellipsoid probability.

| <b>Table 2 Crystal data and structure refinement for<br/>CMRV_JP_395_A_autored.</b> |                                                                  |
|-------------------------------------------------------------------------------------|------------------------------------------------------------------|
| Identification code                                                                 | CMRV_JP_395_A_autored                                            |
| Empirical formula                                                                   | C <sub>33</sub> H <sub>24</sub> Cl <sub>3</sub> O <sub>3</sub> P |
| Formula weight                                                                      | 605.84                                                           |
| Temperature/K                                                                       | 150.00(10)                                                       |
| Crystal system                                                                      | monoclinic                                                       |
| Space group                                                                         | P2 <sub>1</sub> /n                                               |
| a/Å                                                                                 | 12.6015(3)                                                       |
| b/Å                                                                                 | 16.8085(2)                                                       |

|                                               |                                                               |
|-----------------------------------------------|---------------------------------------------------------------|
| $c/\text{\AA}$                                | 14.3074(3)                                                    |
| $\alpha/^\circ$                               | 90                                                            |
| $\beta/^\circ$                                | 112.713(2)                                                    |
| $\gamma/^\circ$                               | 90                                                            |
| Volume/ $\text{\AA}^3$                        | 2795.47(10)                                                   |
| $Z$                                           | 4                                                             |
| $\rho_{\text{calc}}/\text{g/cm}^3$            | 1.440                                                         |
| $\mu/\text{mm}^{-1}$                          | 0.420                                                         |
| $F(000)$                                      | 1248.0                                                        |
| Crystal size/ $\text{mm}^3$                   | $0.27 \times 0.24 \times 0.23$                                |
| Radiation                                     | Mo $K\alpha$ ( $\lambda = 0.71073$ )                          |
| $2\Theta$ range for data collection/ $^\circ$ | 3.924 to 50                                                   |
| Index ranges                                  | $-14 \leq h \leq 14, -19 \leq k \leq 19, -17 \leq l \leq 17$  |
| Reflections collected                         | 53767                                                         |
| Independent reflections                       | 4896 [ $R_{\text{int}} = 0.0756, R_{\text{sigma}} = 0.0305$ ] |
| Data/restraints/parameters                    | 4896/0/326                                                    |
| Goodness-of-fit on $F^2$                      | 1.062                                                         |
| Final R indexes [ $I \geq 2\sigma(I)$ ]       | $R_1 = 0.0597, wR_2 = 0.1533$                                 |
| Final R indexes [all data]                    | $R_1 = 0.0681, wR_2 = 0.1606$                                 |
| Largest diff. peak/hole / $e \text{\AA}^{-3}$ | 0.38/-0.43                                                    |

**c. X-ray Crystallography data for the compound of 9b**

Crystal of the compound **9b** was obtained after slow evaporation of acetonitrile solvent.

Molecular structure of **9b** with 50% ellipsoid probability.

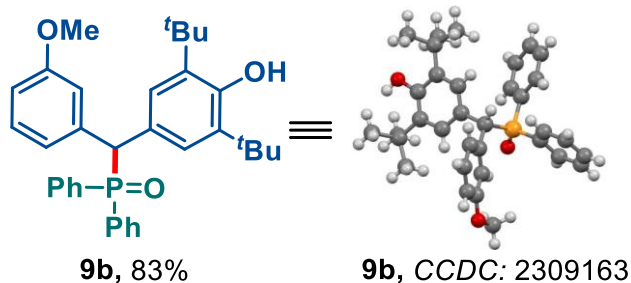

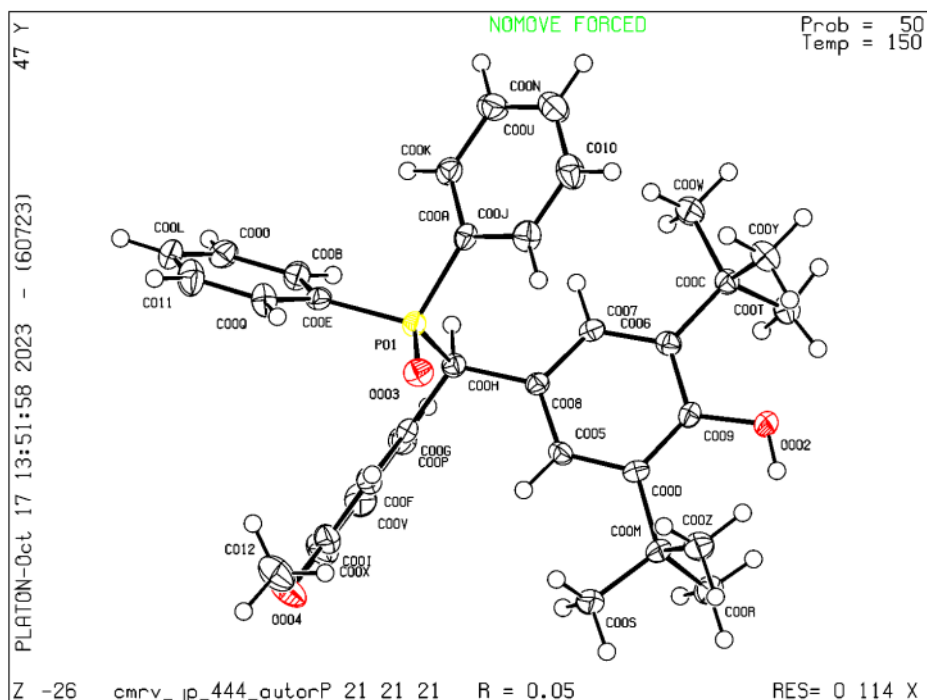

**Figure S14.** Molecular structure of **9b** with 50% ellipsoid probability.

| <b>Table 3 Crystal data and structure refinement for<br/>CMRV_JP_444_autored.</b> |                                                  |
|-----------------------------------------------------------------------------------|--------------------------------------------------|
| Identification code                                                               | CMRV_JP_444_autored                              |
| Empirical formula                                                                 | C <sub>34</sub> H <sub>39</sub> O <sub>3</sub> P |
| Formula weight                                                                    | 526.62                                           |
| Temperature/K                                                                     | 150.00(10)                                       |
| Crystal system                                                                    | orthorhombic                                     |
| Space group                                                                       | P2 <sub>1</sub> 2 <sub>1</sub> 2 <sub>1</sub>    |
| a/Å                                                                               | 9.2907(3)                                        |
| b/Å                                                                               | 14.7314(4)                                       |
| c/Å                                                                               | 21.2629(6)                                       |
| α/°                                                                               | 90                                               |
| β/°                                                                               | 90                                               |
| γ/°                                                                               | 90                                               |
| Volume/Å <sup>3</sup>                                                             | 2910.15(15)                                      |
| Z                                                                                 | 4                                                |
| ρ <sub>calc</sub> /cm <sup>3</sup>                                                | 1.202                                            |

|                                                |                                                               |
|------------------------------------------------|---------------------------------------------------------------|
| $\mu/\text{mm}^{-1}$                           | 0.127                                                         |
| F(000)                                         | 1128.0                                                        |
| Crystal size/ $\text{mm}^3$                    | $0.089 \times 0.067 \times 0.035$                             |
| Radiation                                      | Mo K $\alpha$ ( $\lambda = 0.71073$ )                         |
| $2\Theta$ range for data collection/ $^\circ$  | 3.364 to 49.994                                               |
| Index ranges                                   | $-9 \leq h \leq 11, -17 \leq k \leq 17, -25 \leq l \leq 23$   |
| Reflections collected                          | 30959                                                         |
| Independent reflections                        | 5130 [ $R_{\text{int}} = 0.1037, R_{\text{sigma}} = 0.0680$ ] |
| Data/restraints/parameters                     | 5130/0/354                                                    |
| Goodness-of-fit on $F^2$                       | 1.044                                                         |
| Final R indexes [ $I \geq 2\sigma(I)$ ]        | $R_1 = 0.0467, wR_2 = 0.1063$                                 |
| Final R indexes [all data]                     | $R_1 = 0.0565, wR_2 = 0.1149$                                 |
| Largest diff. peak/hole / $e \text{ \AA}^{-3}$ | 0.20/-0.36                                                    |
| Flack parameter                                | -0.10(10)                                                     |

## 12. <sup>1</sup>H and <sup>13</sup>C NMR spectra of the compounds

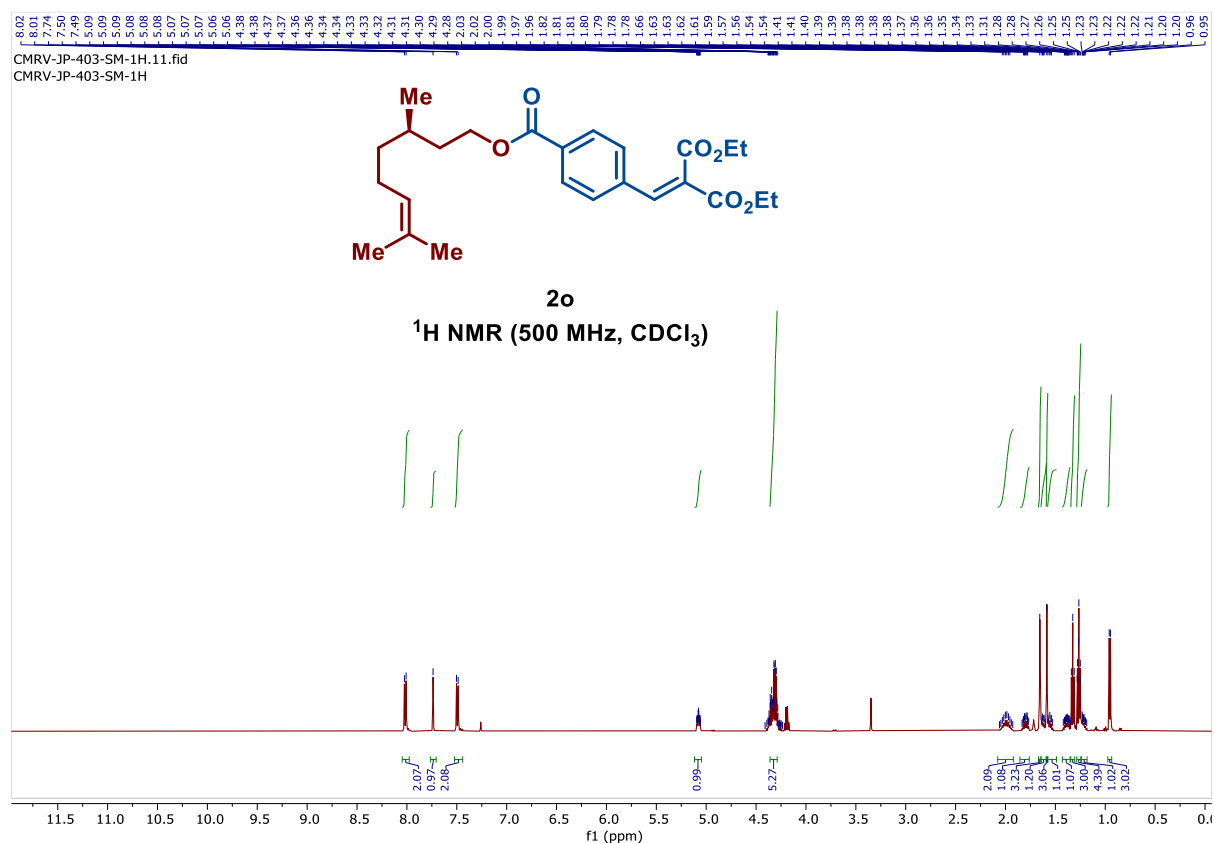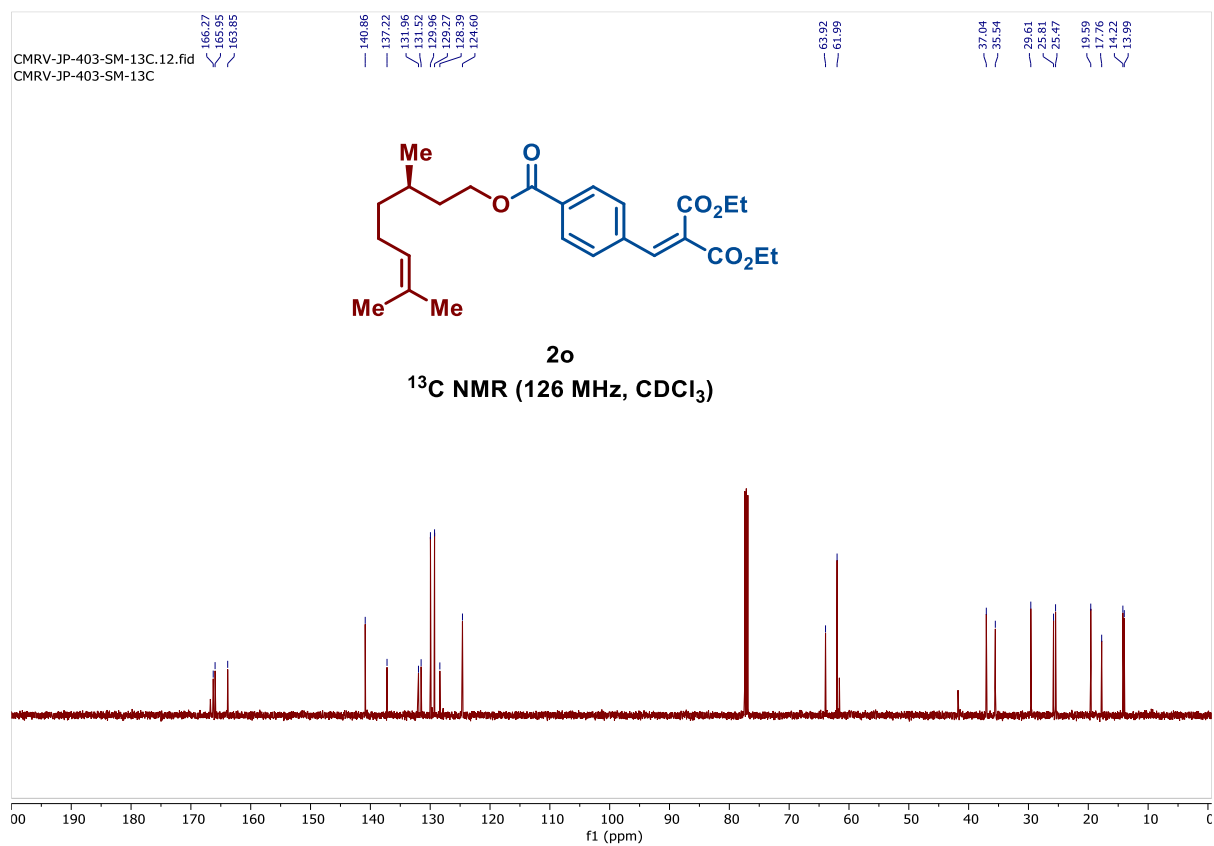







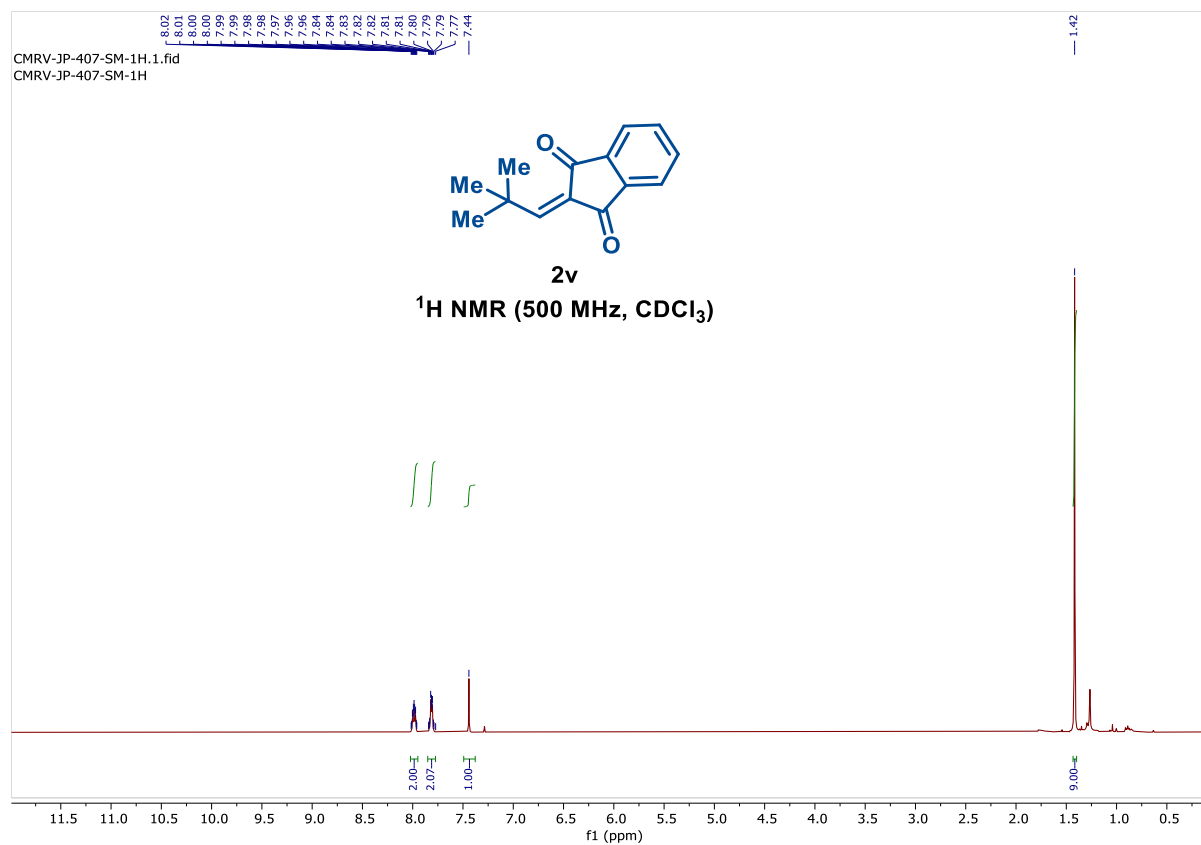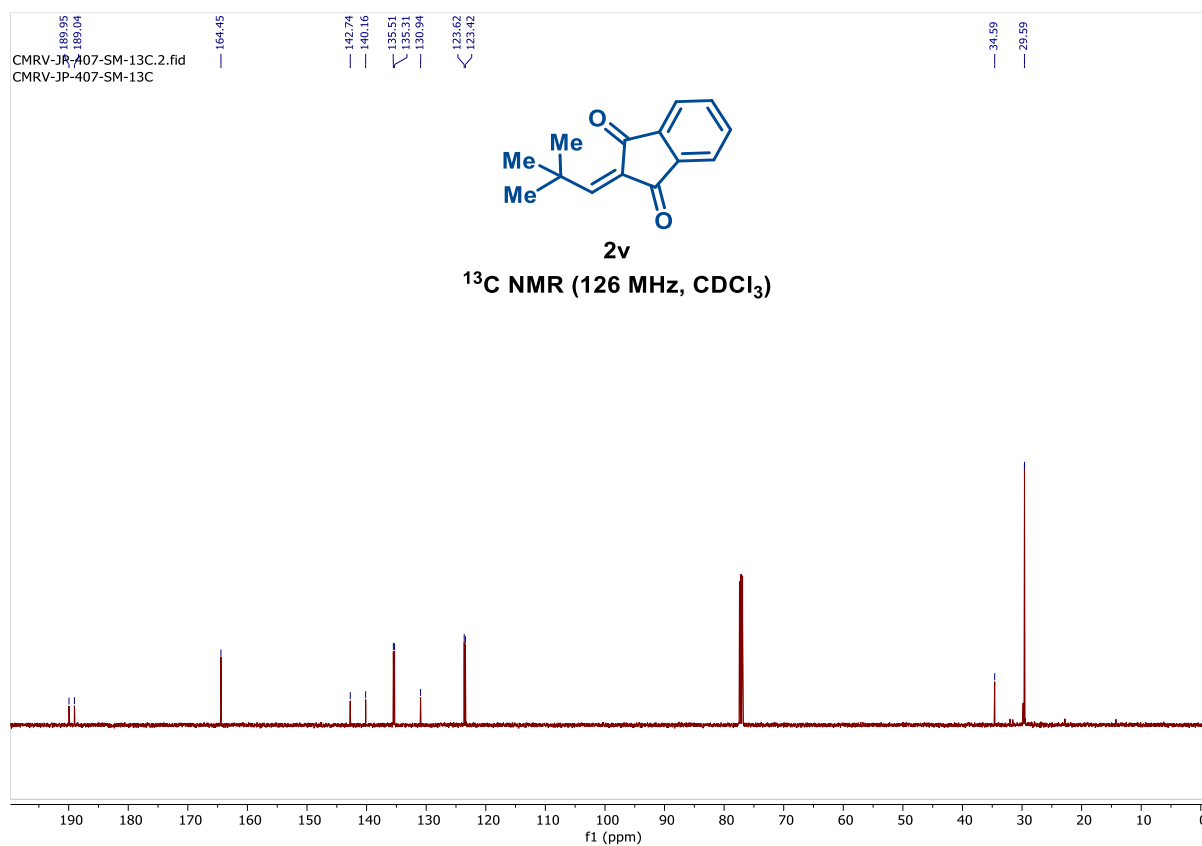

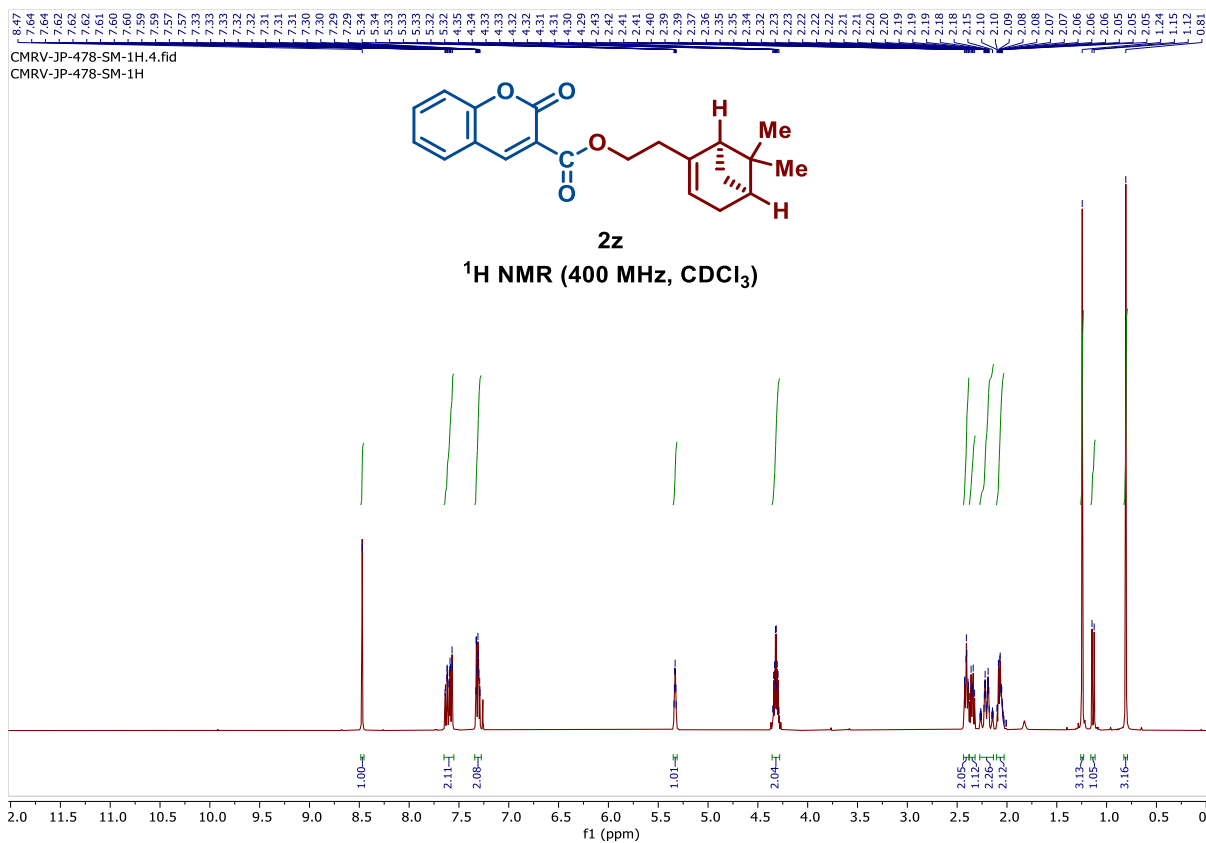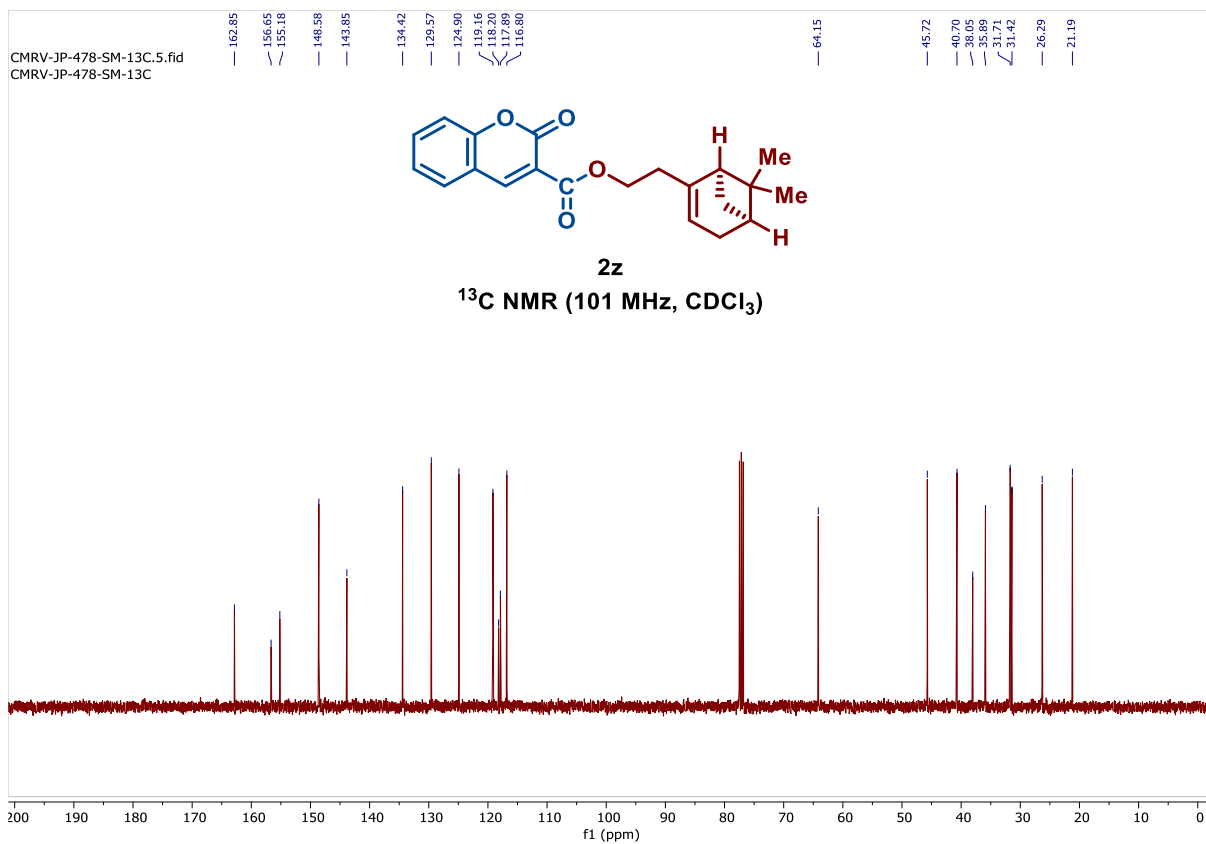

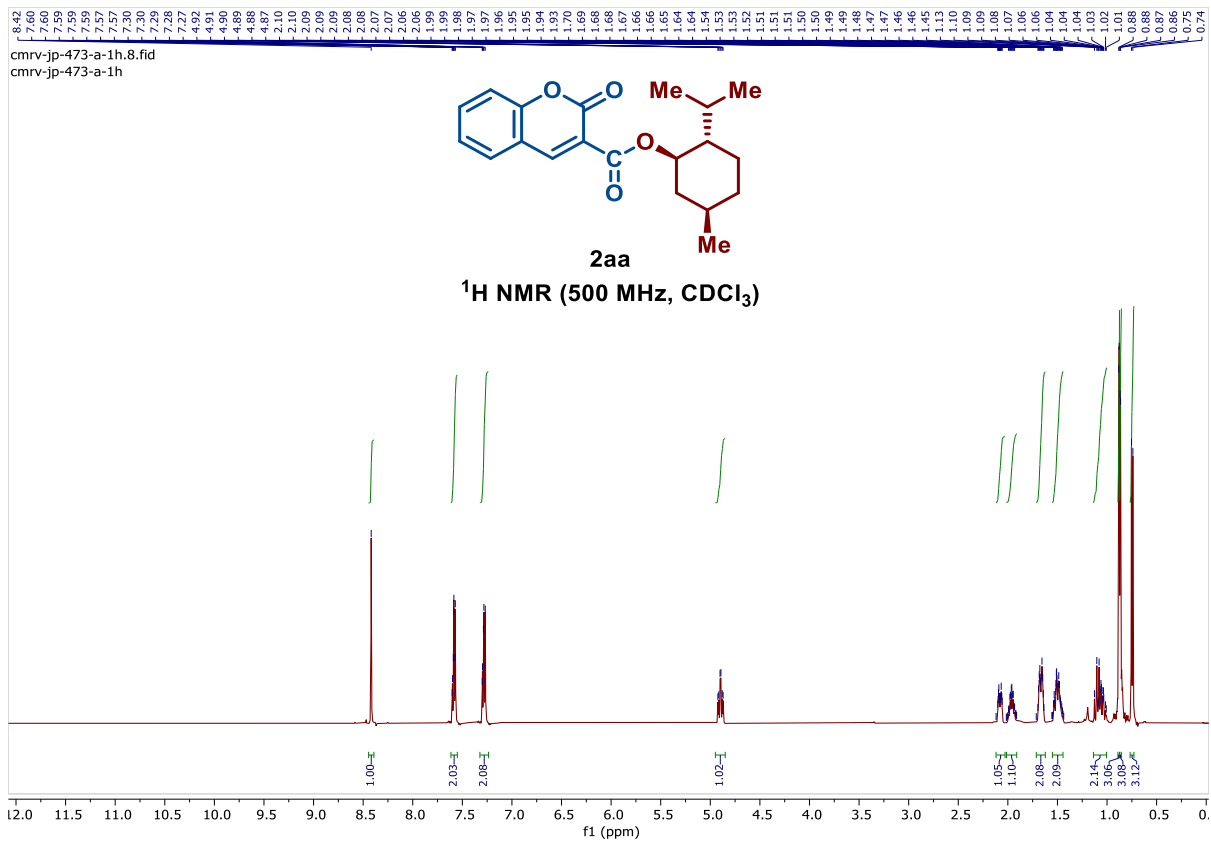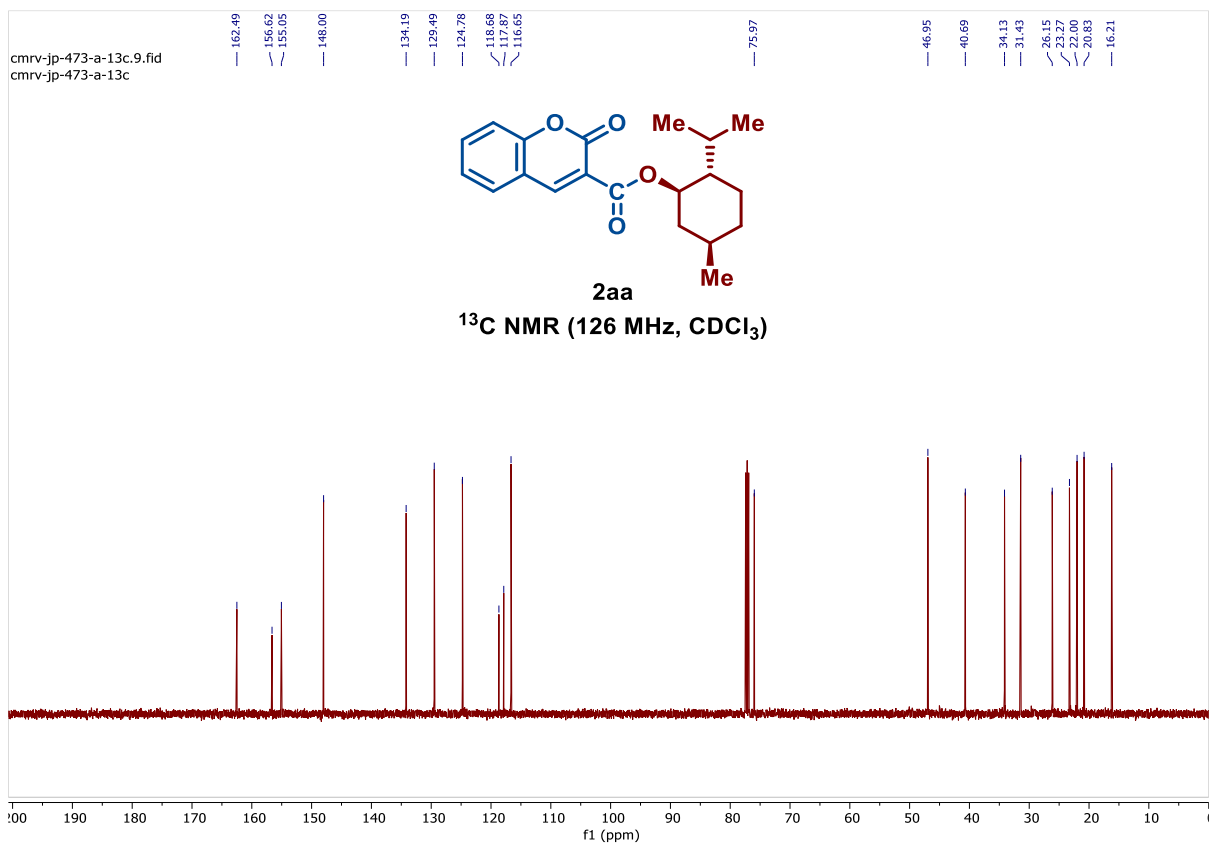

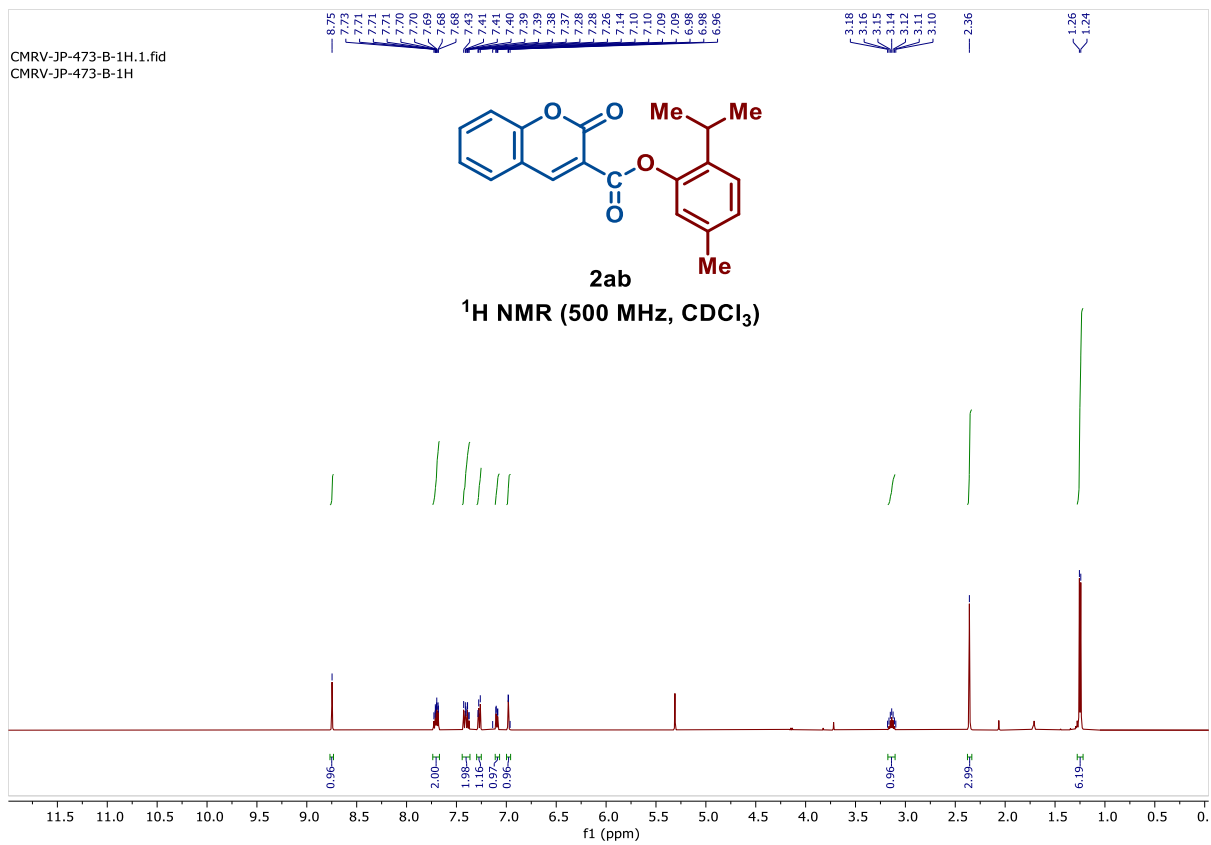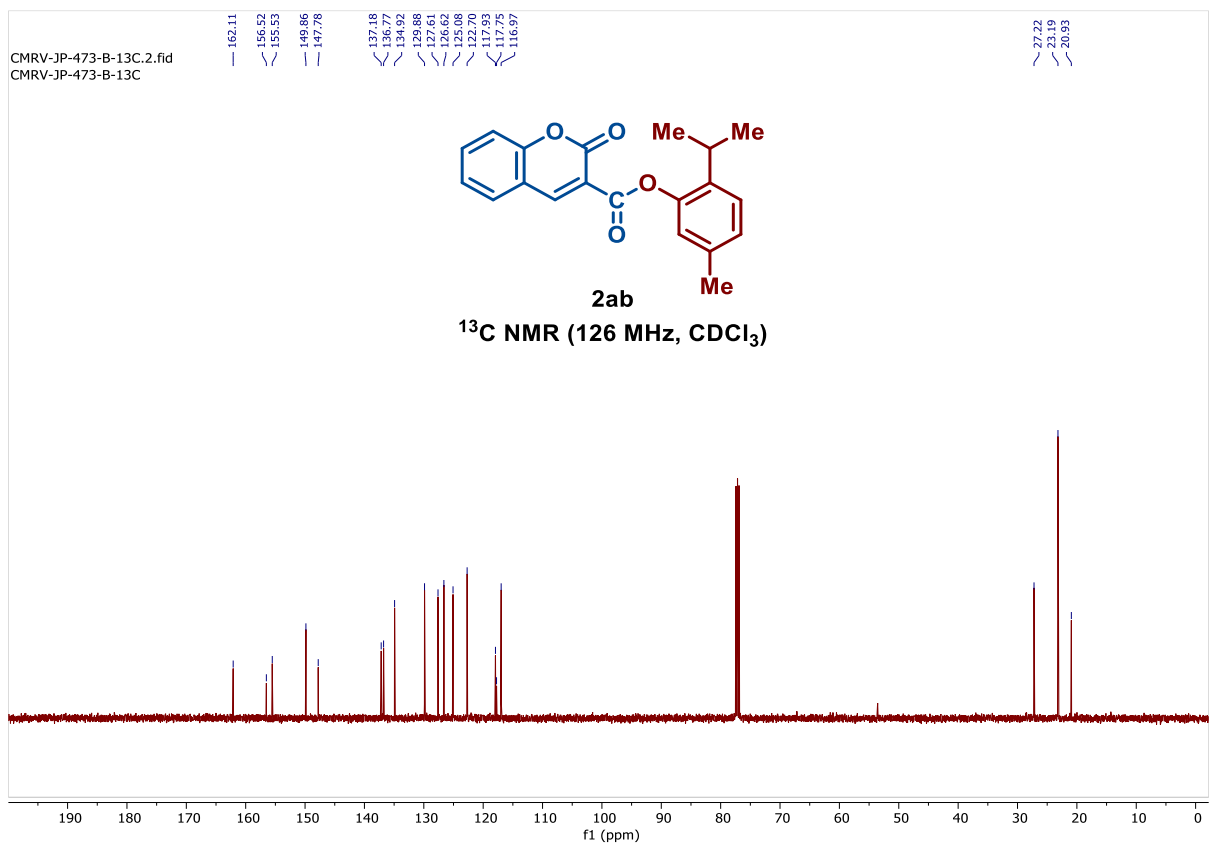



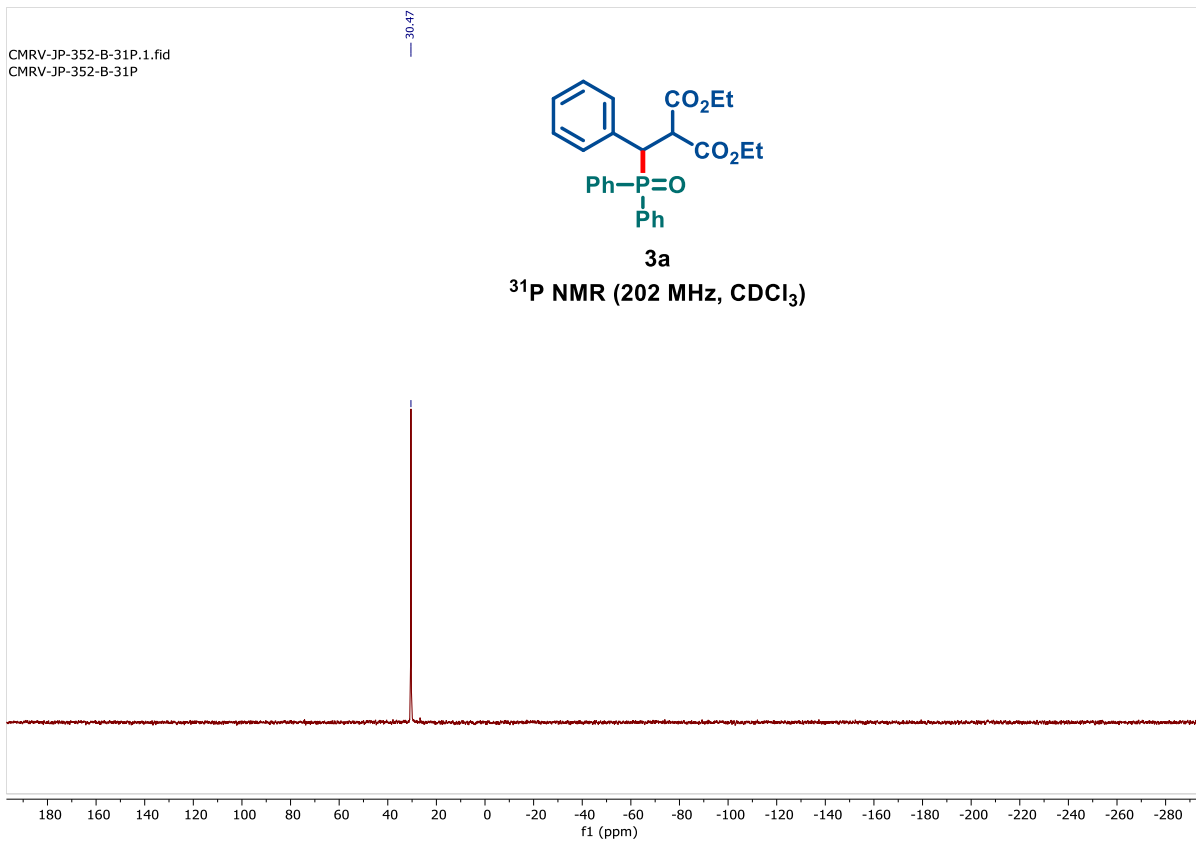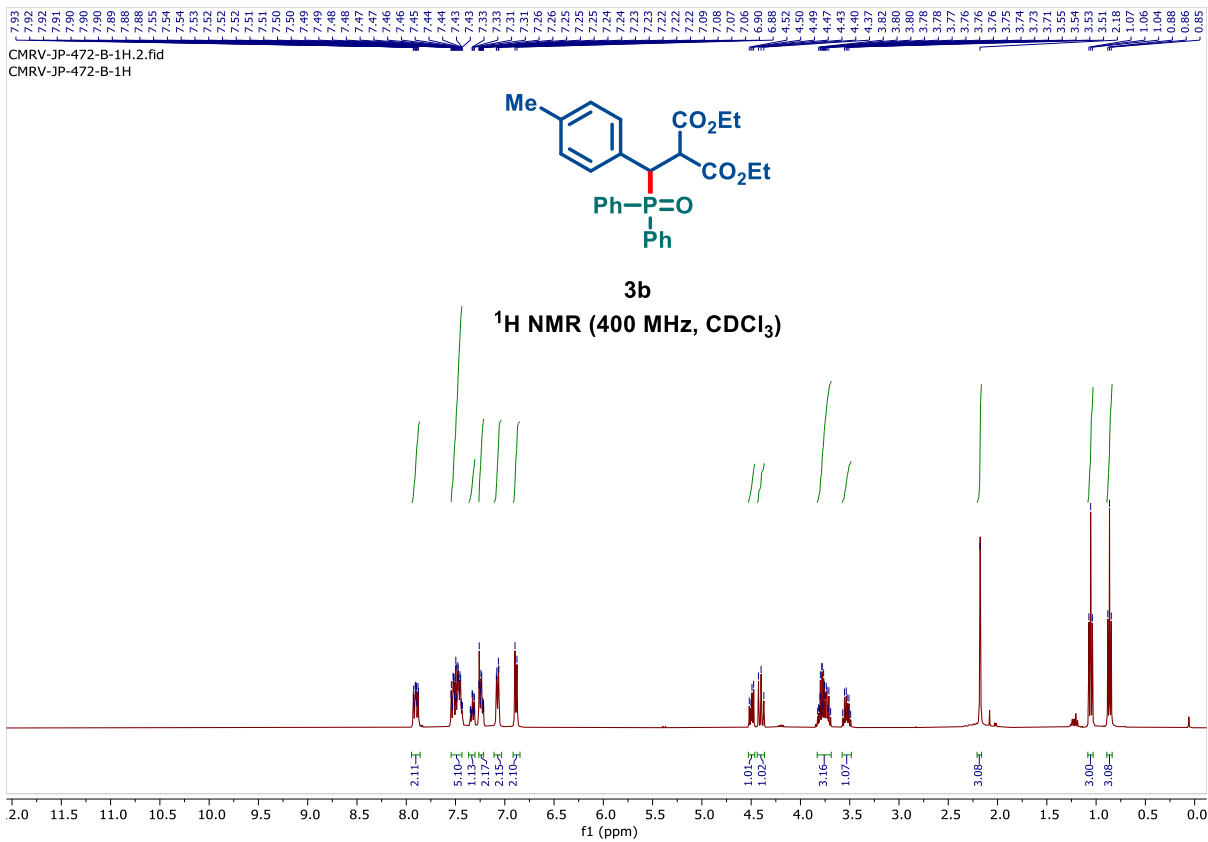

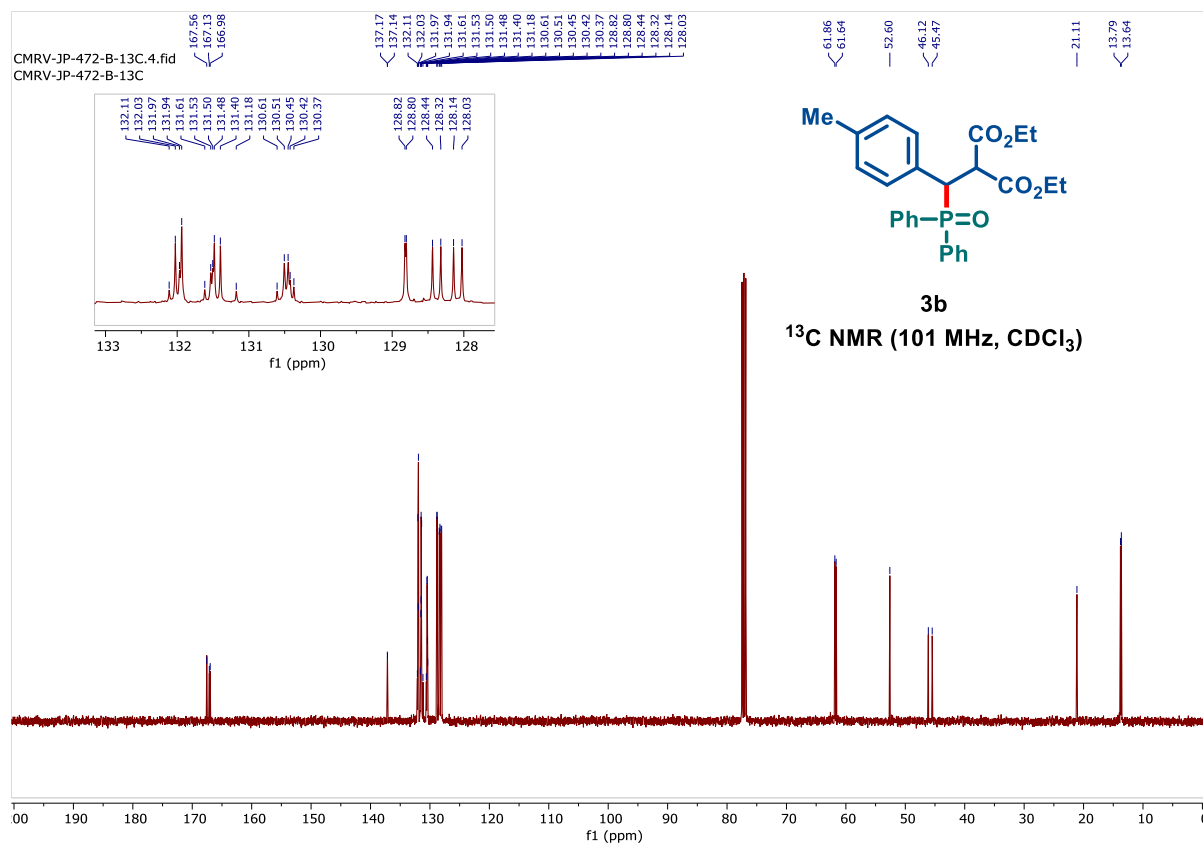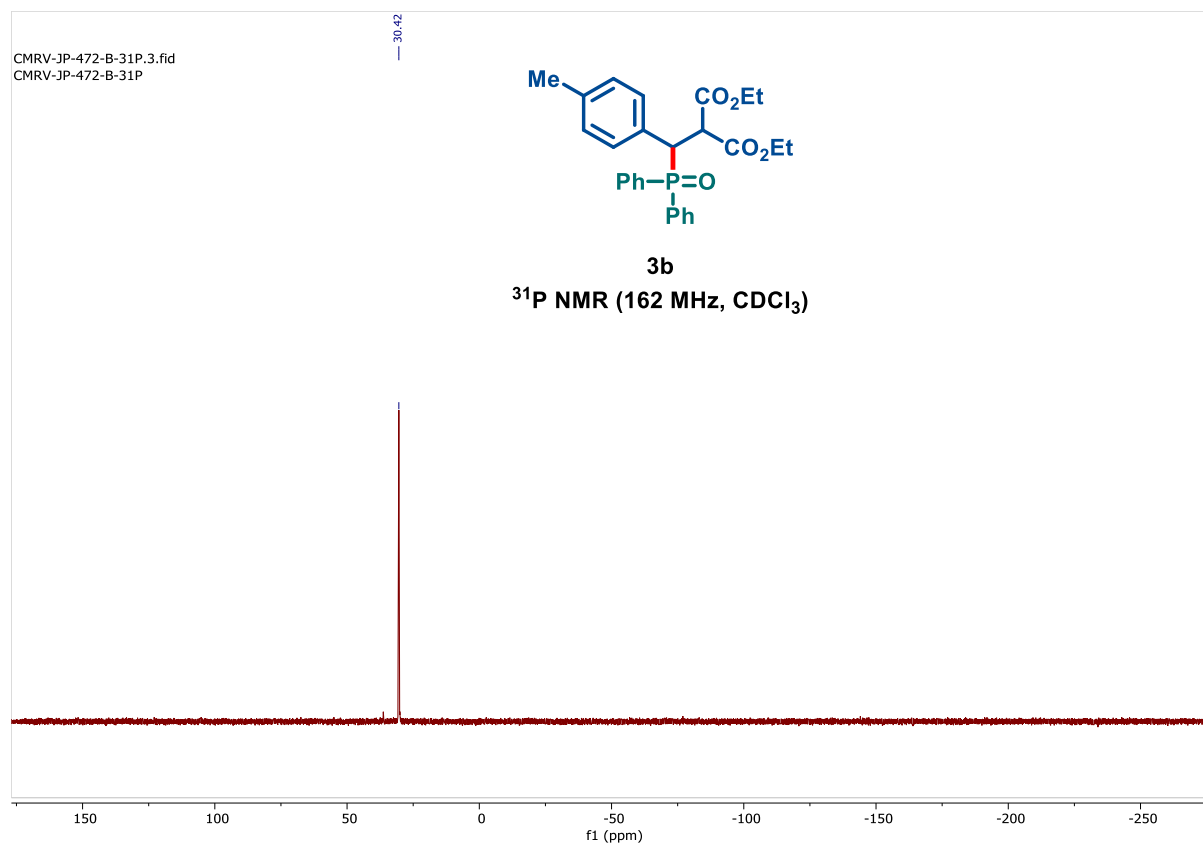





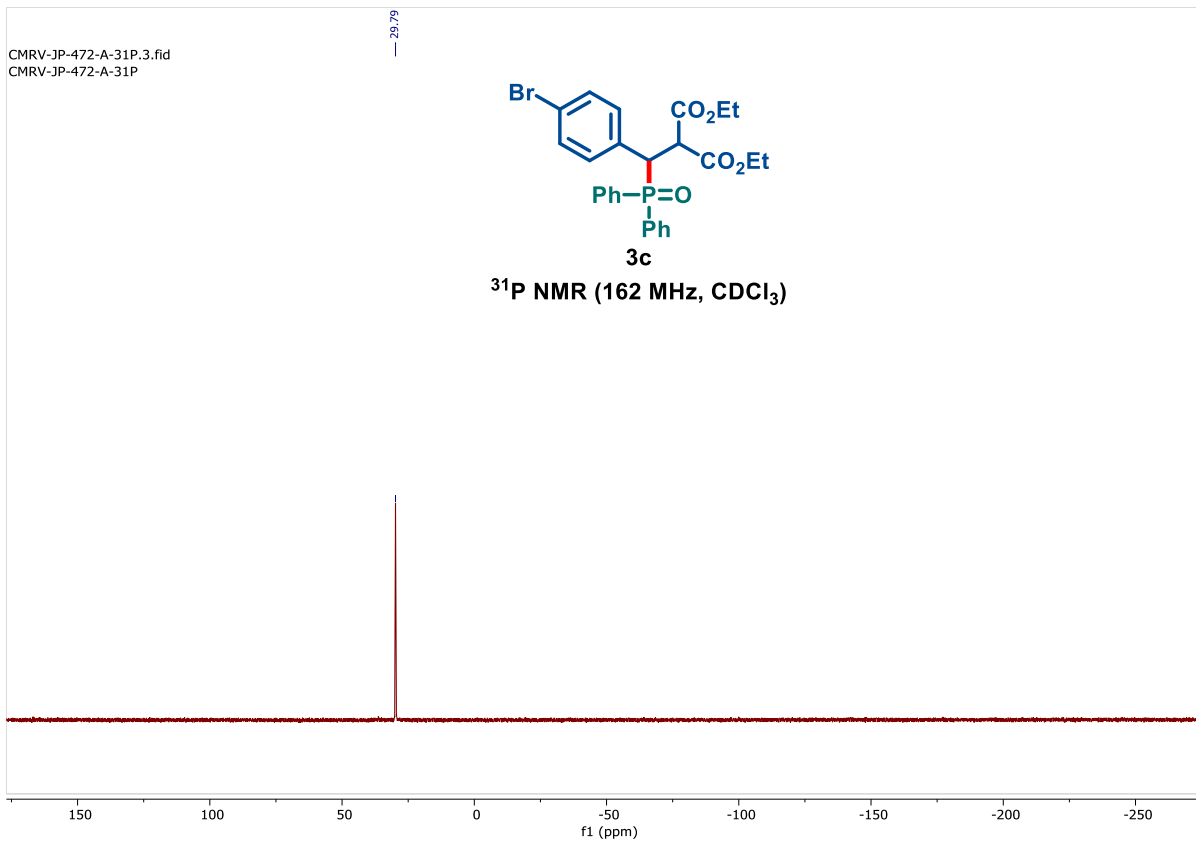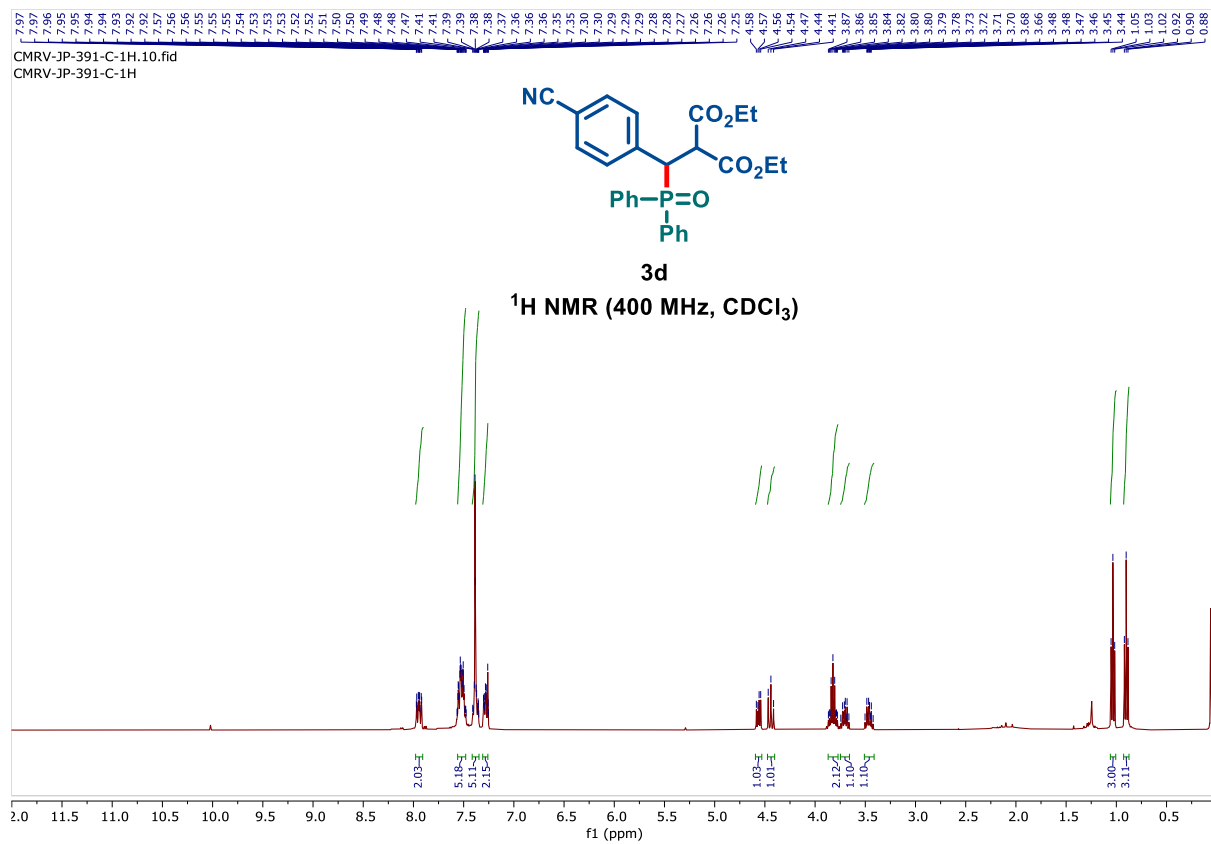

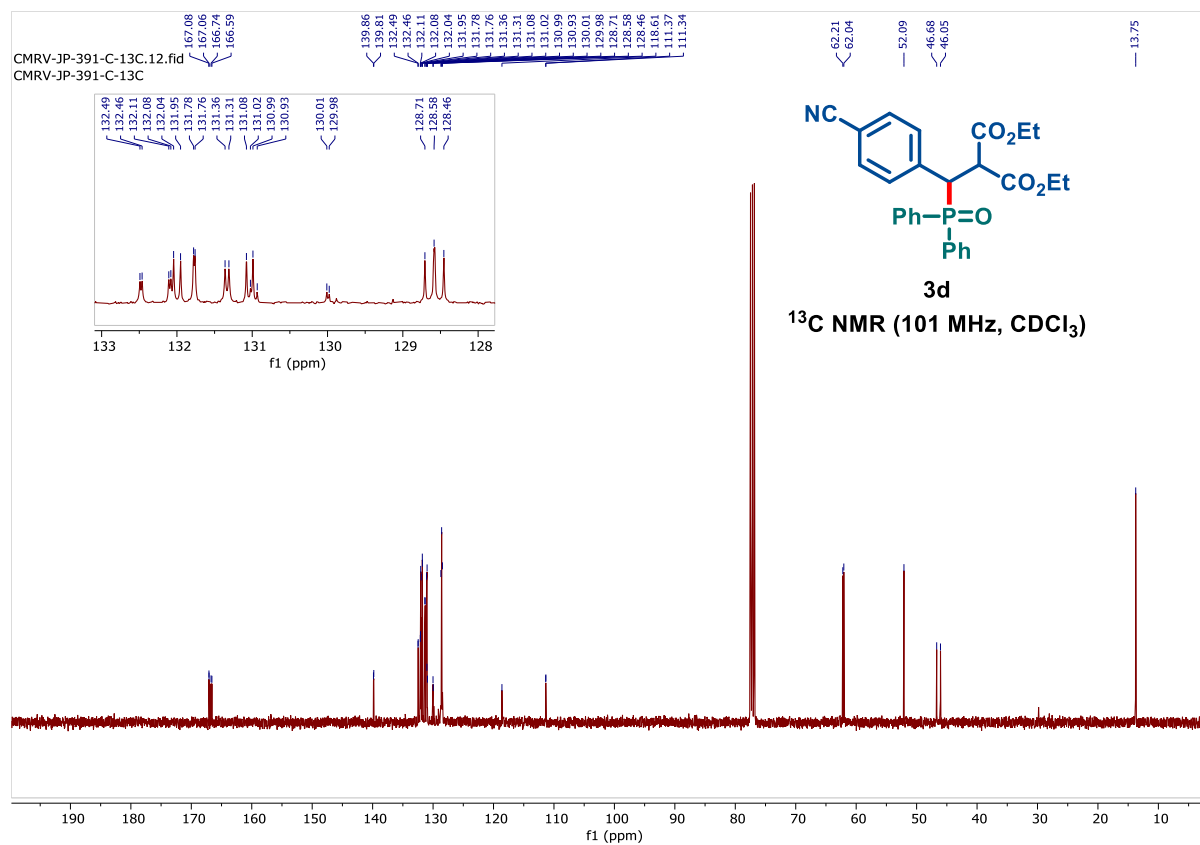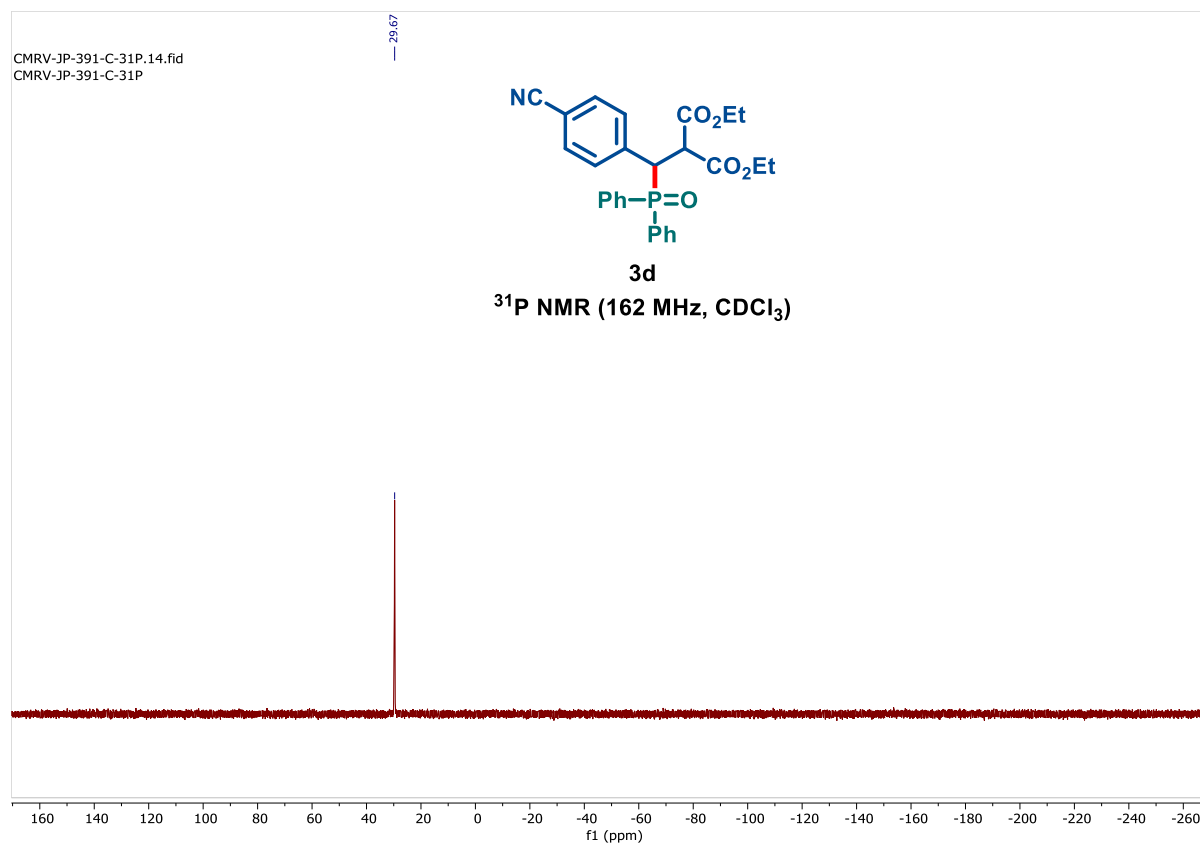

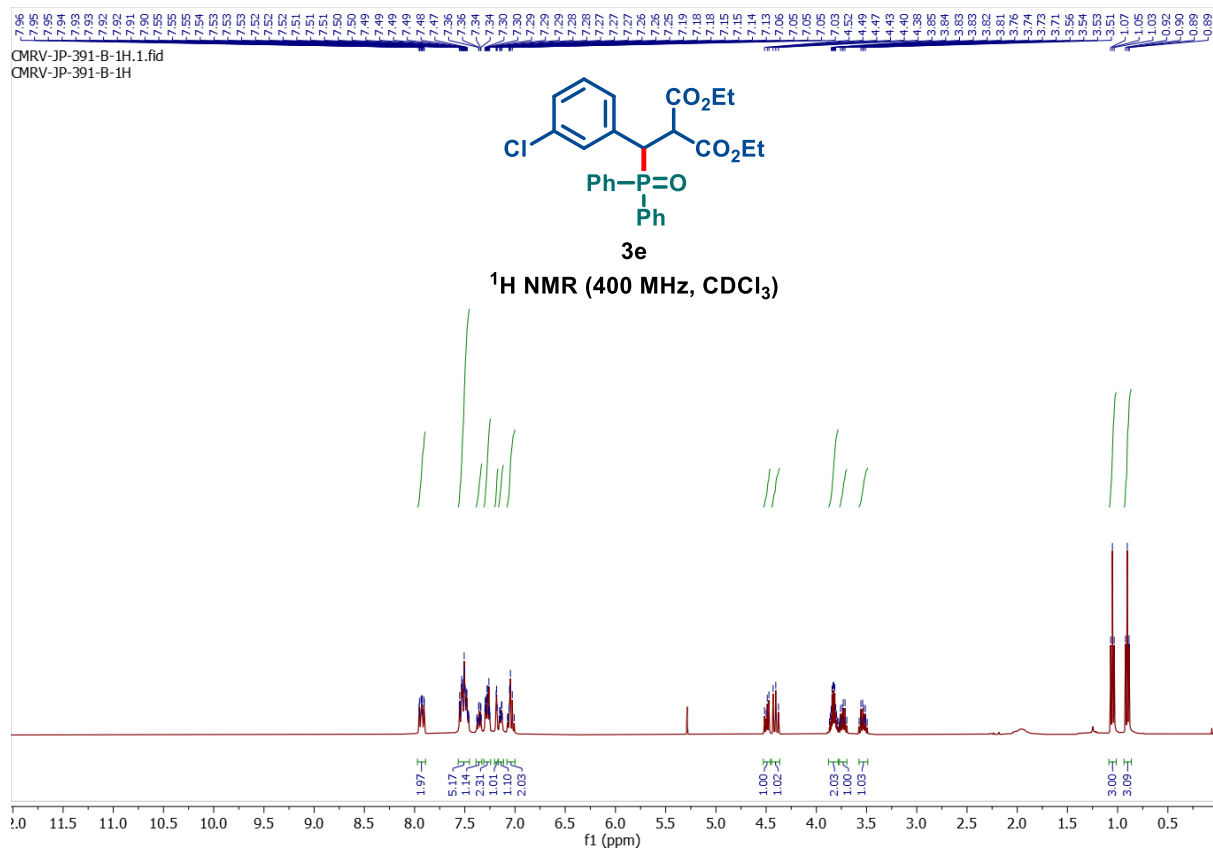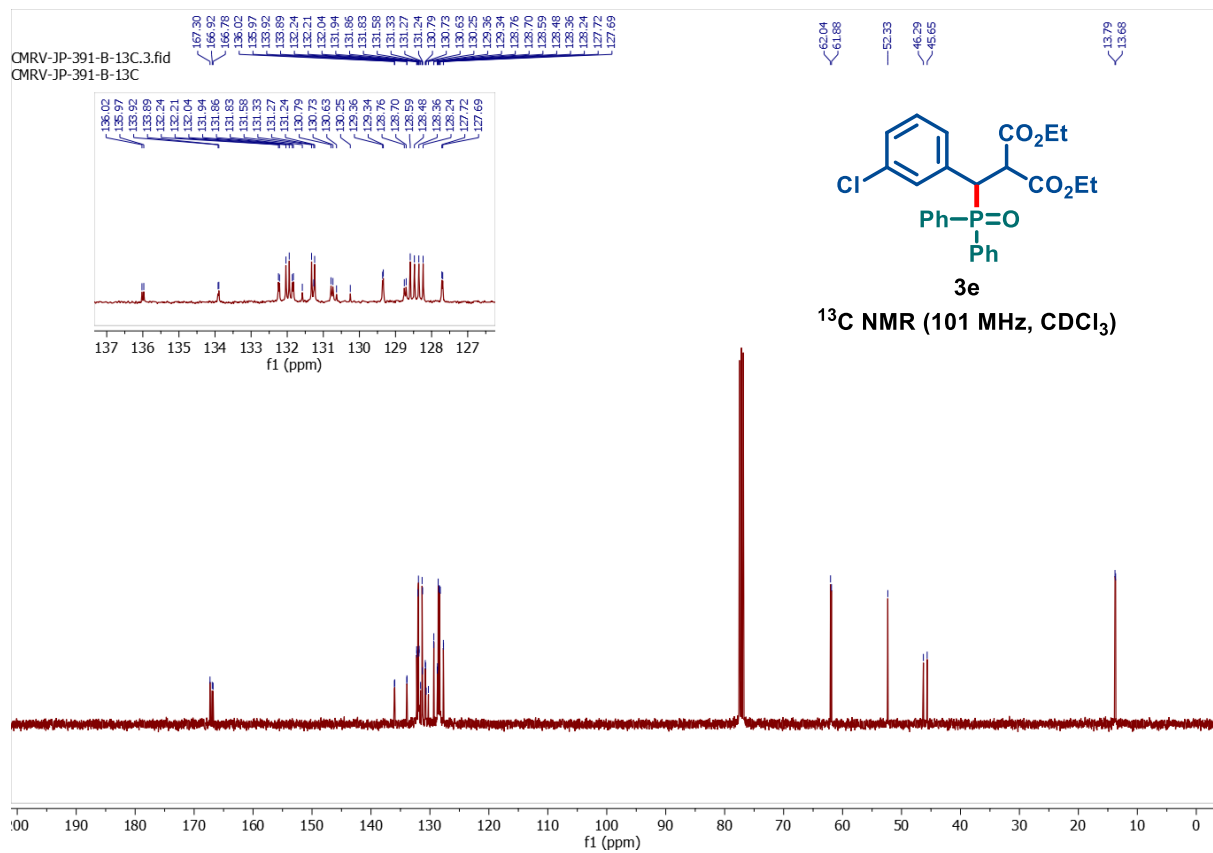

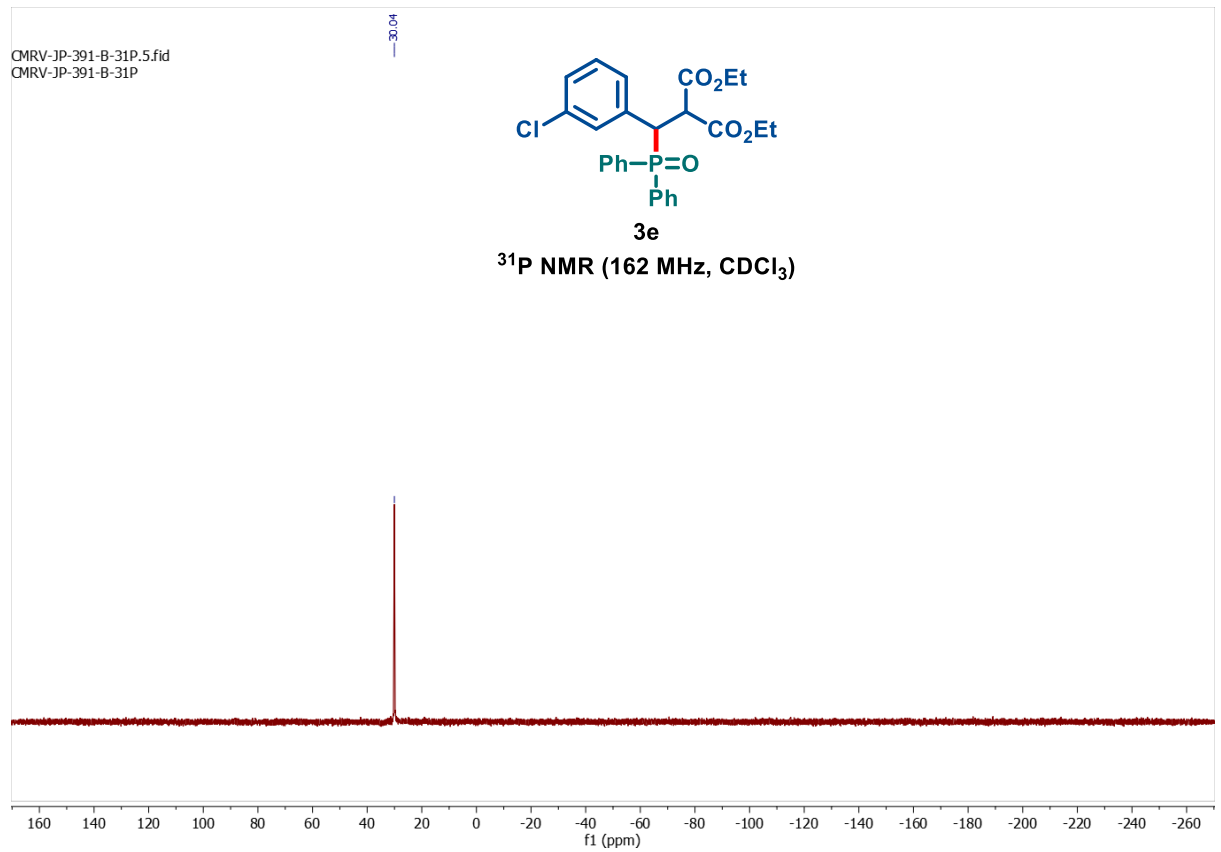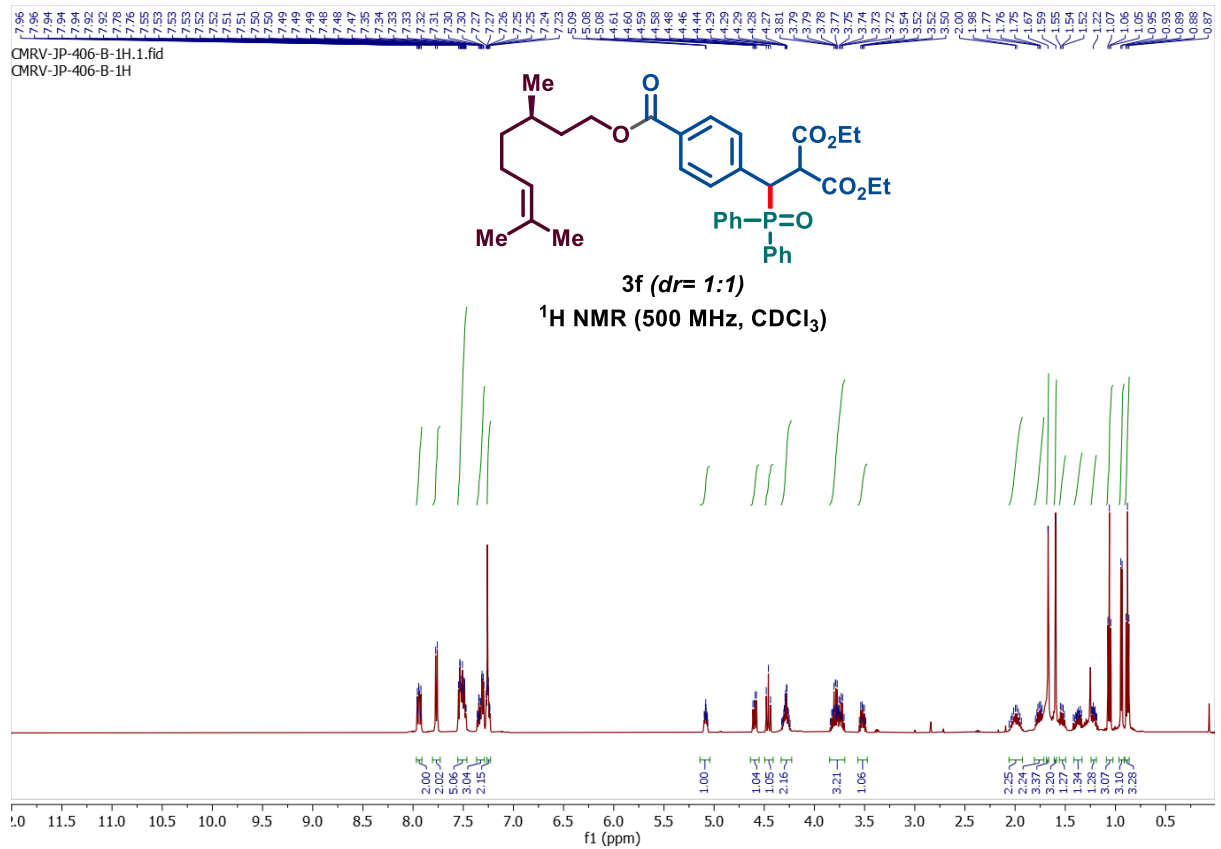

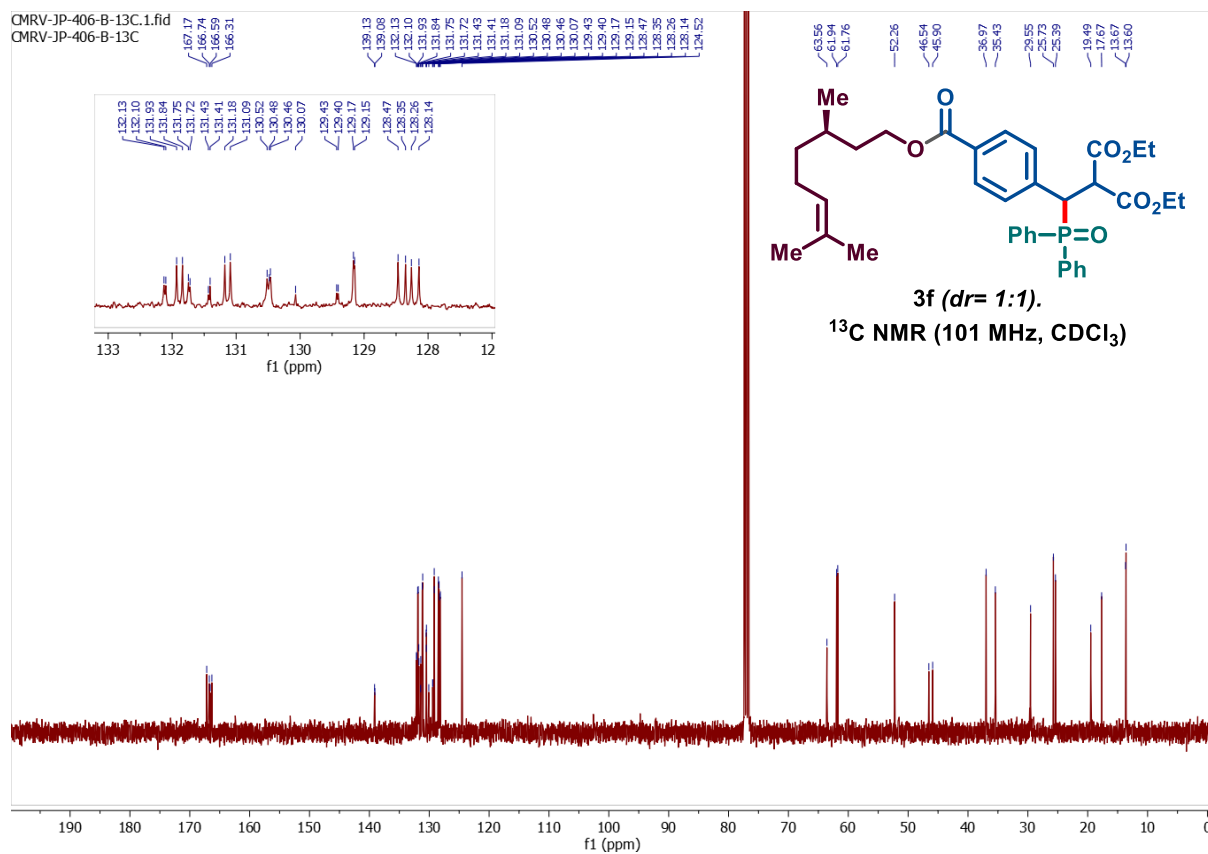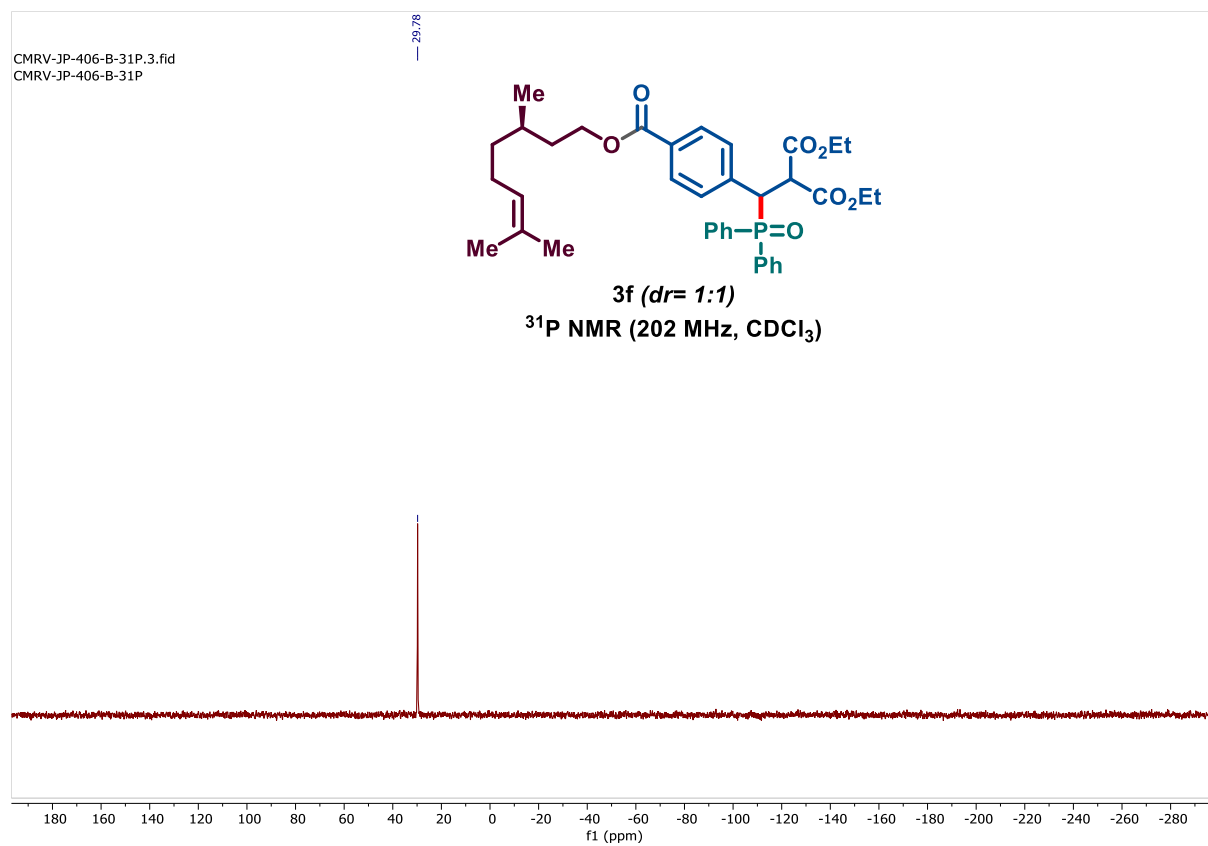

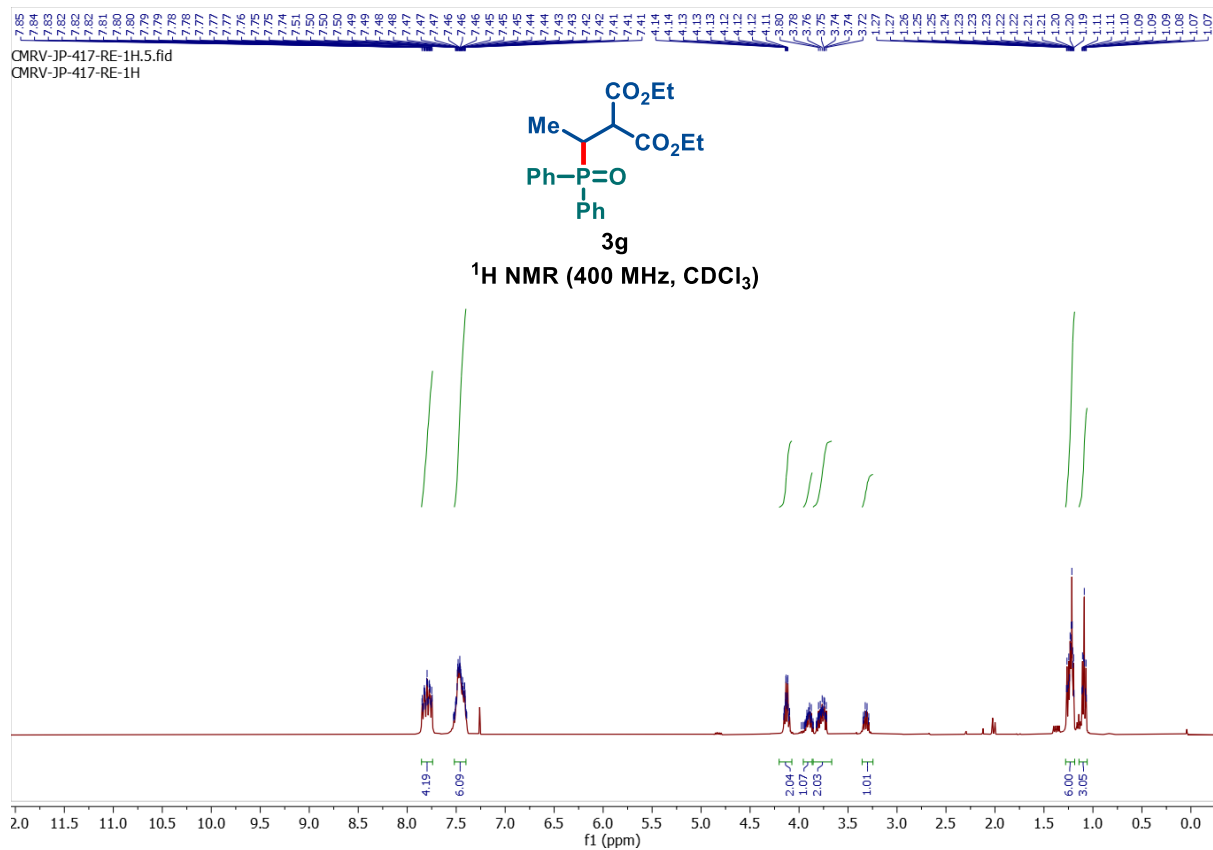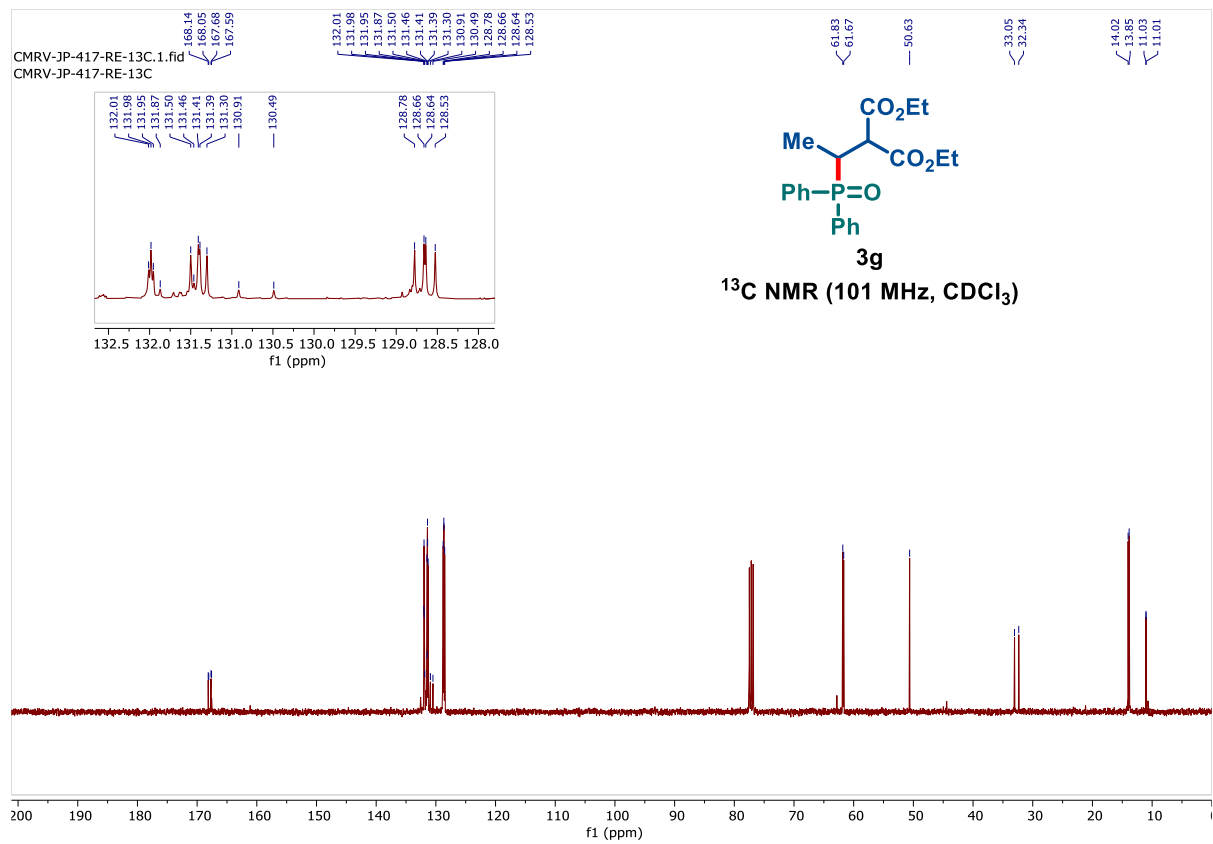

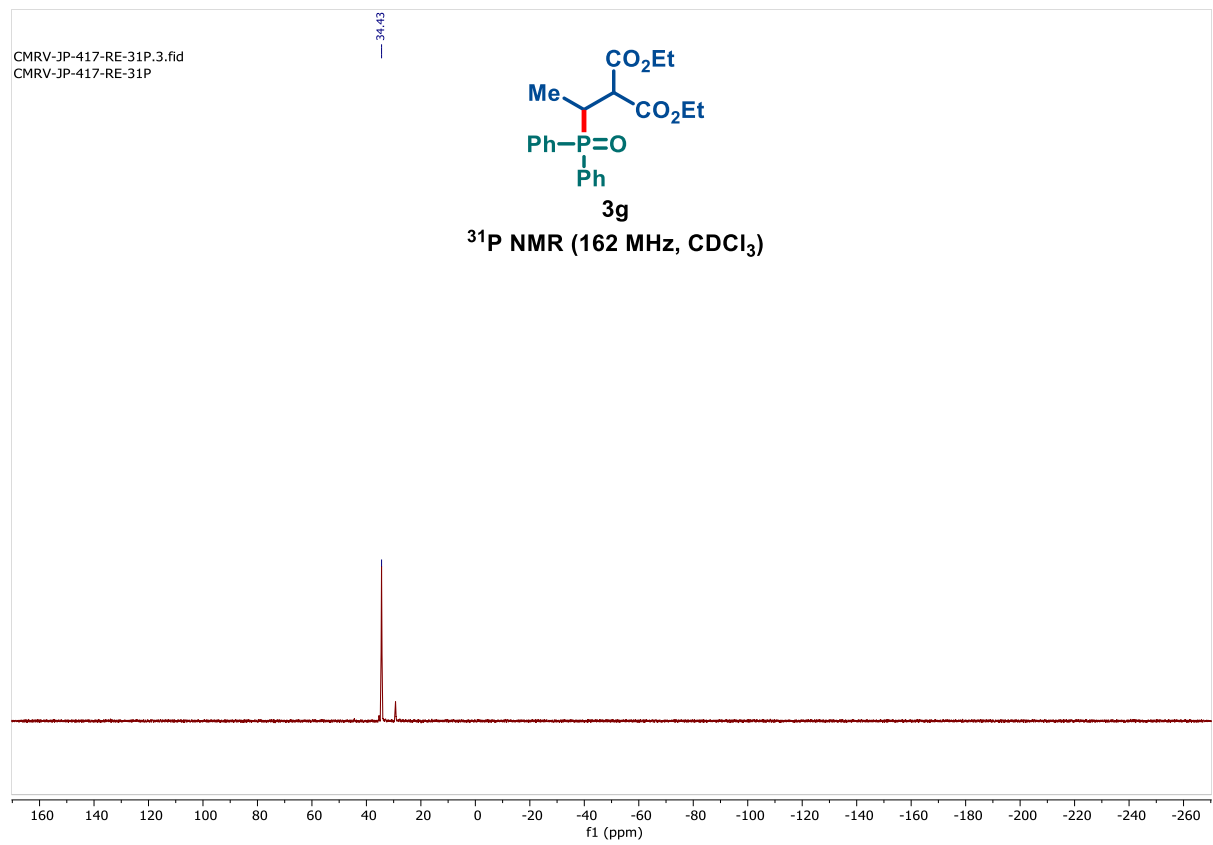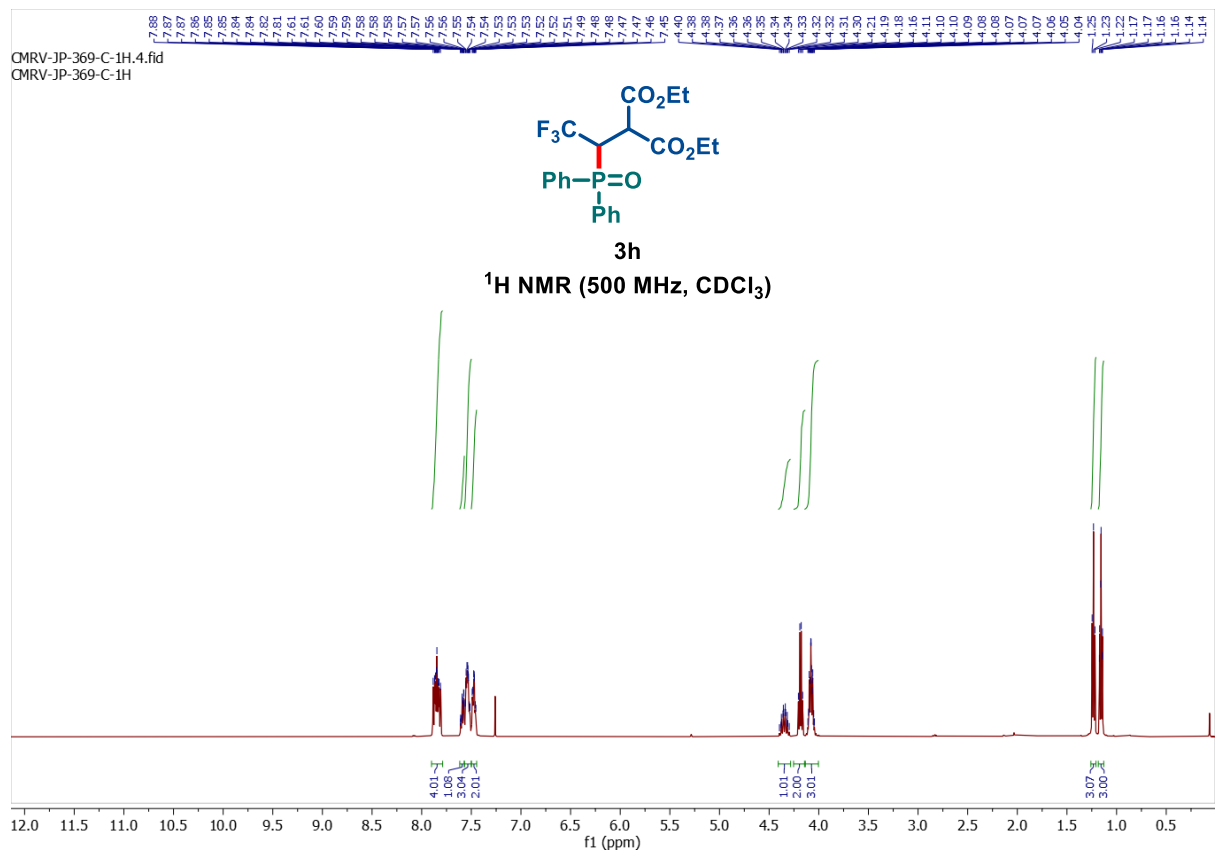



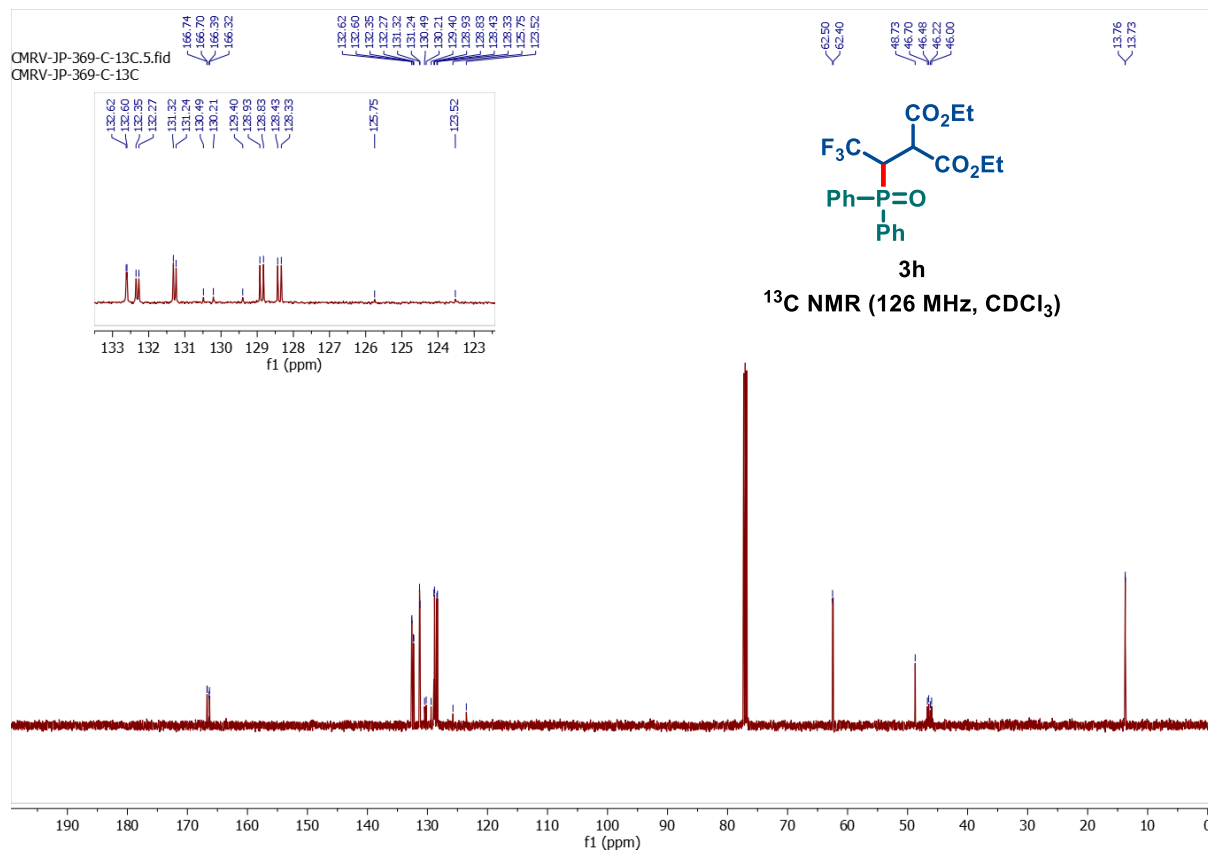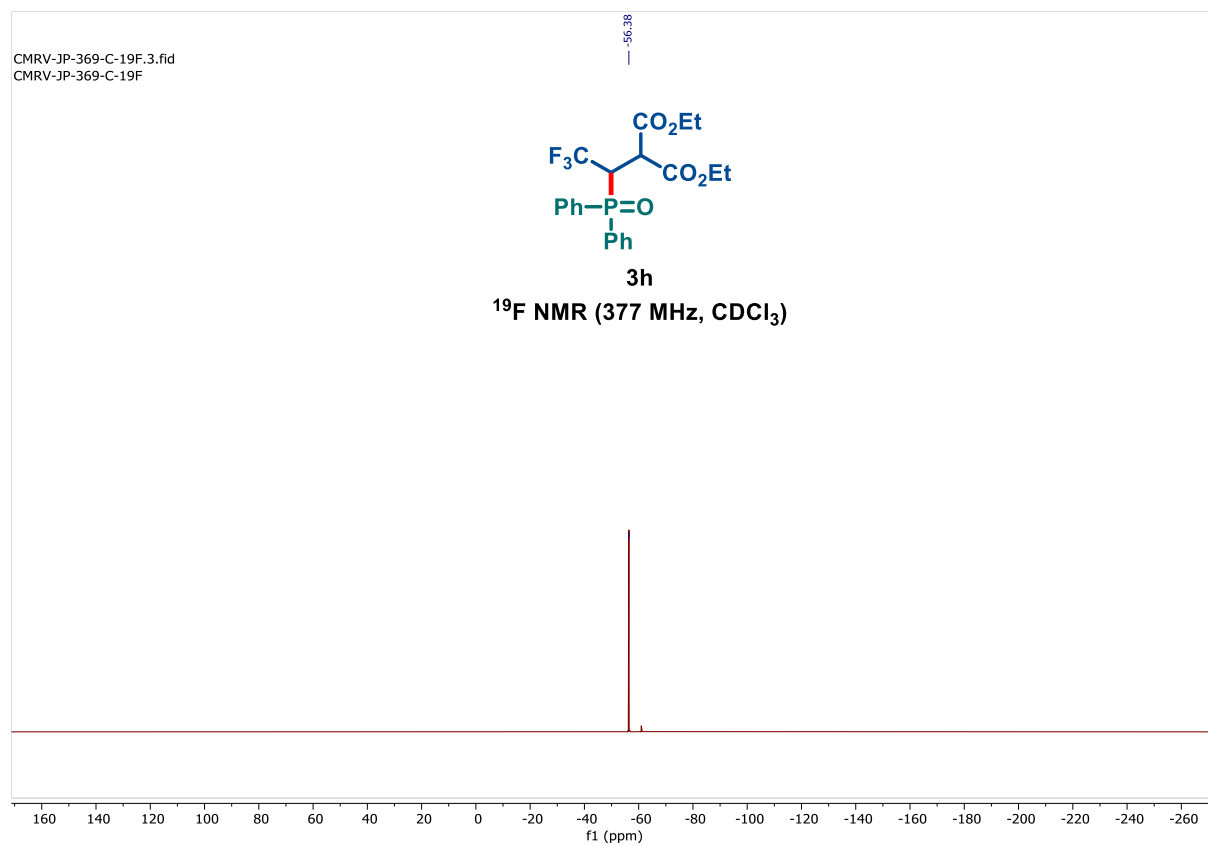



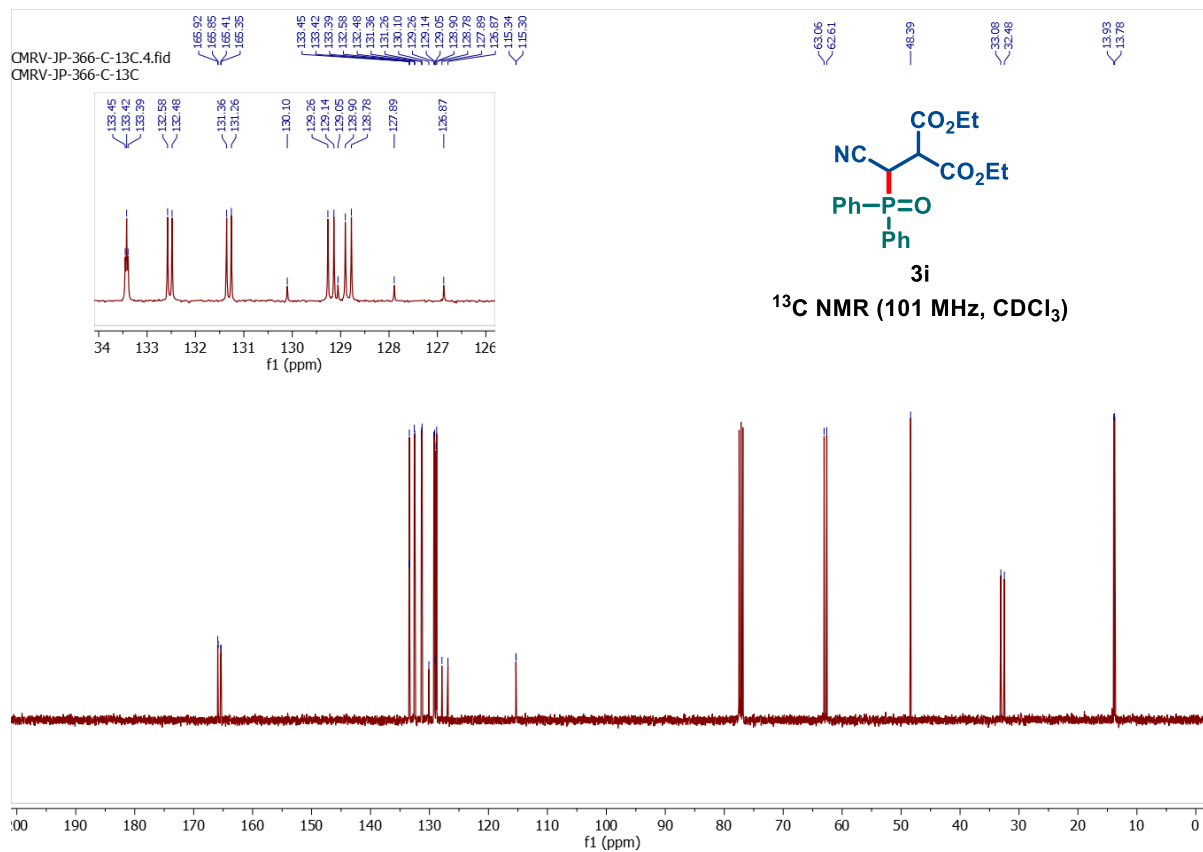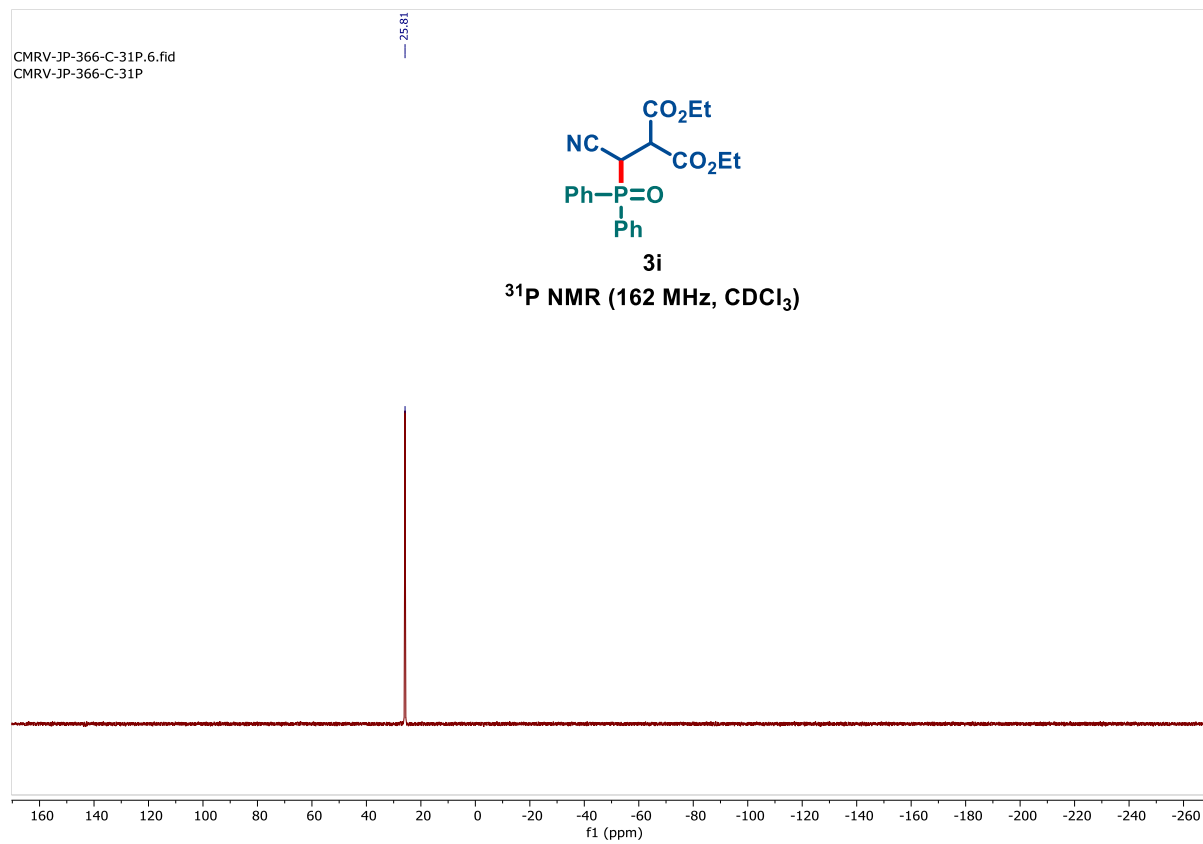

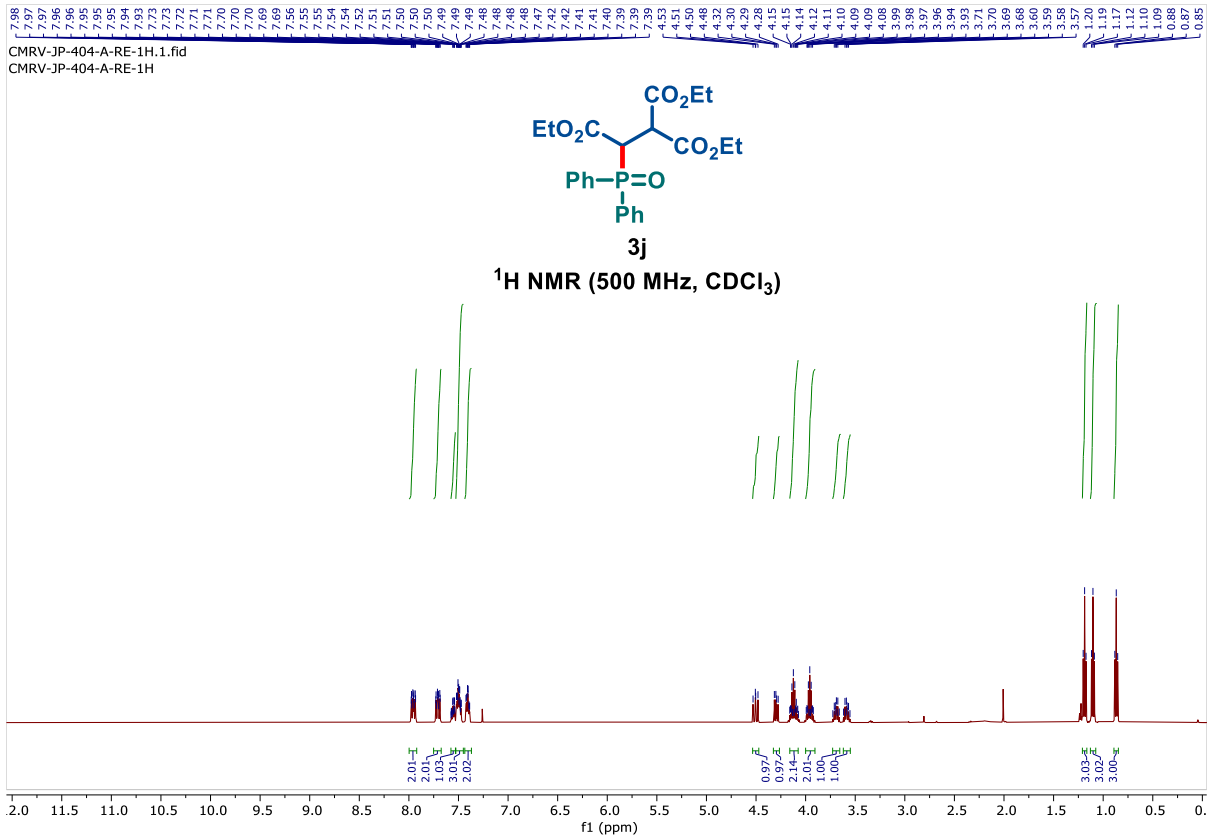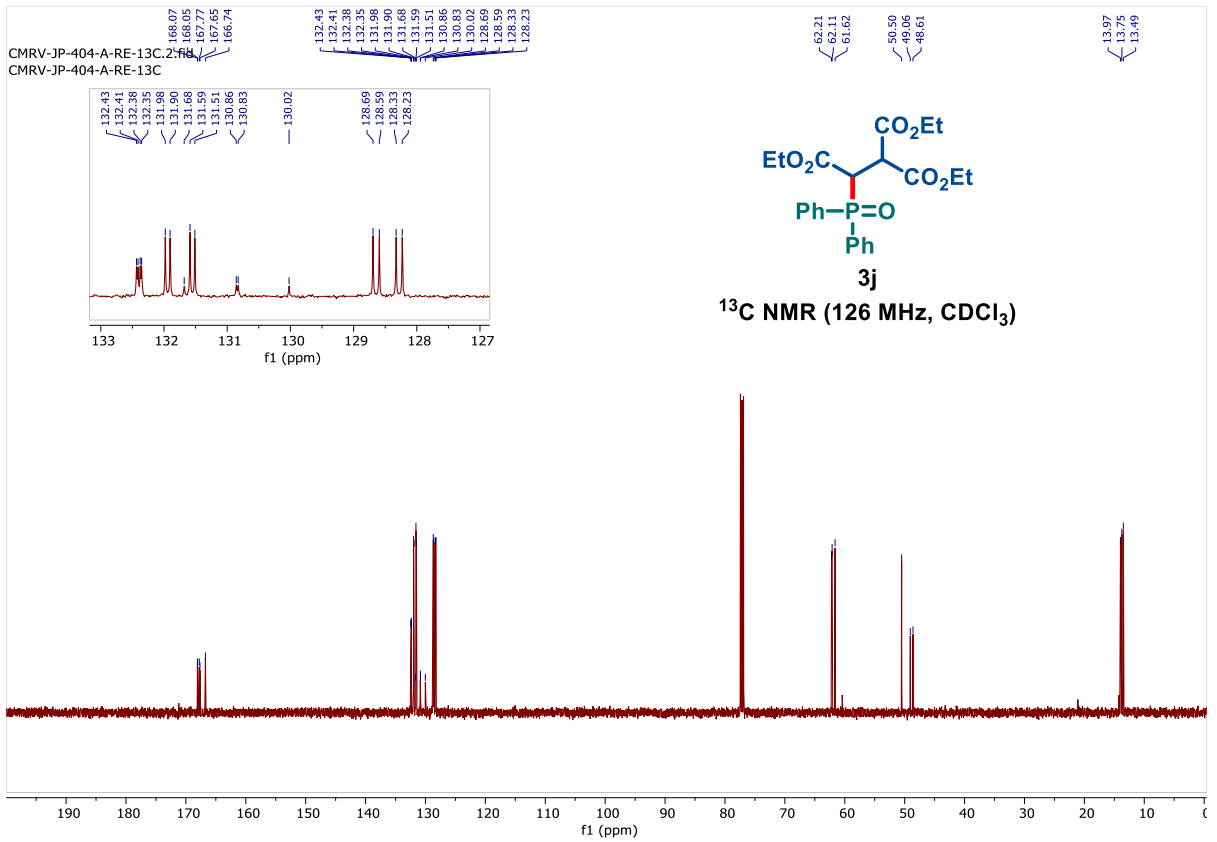

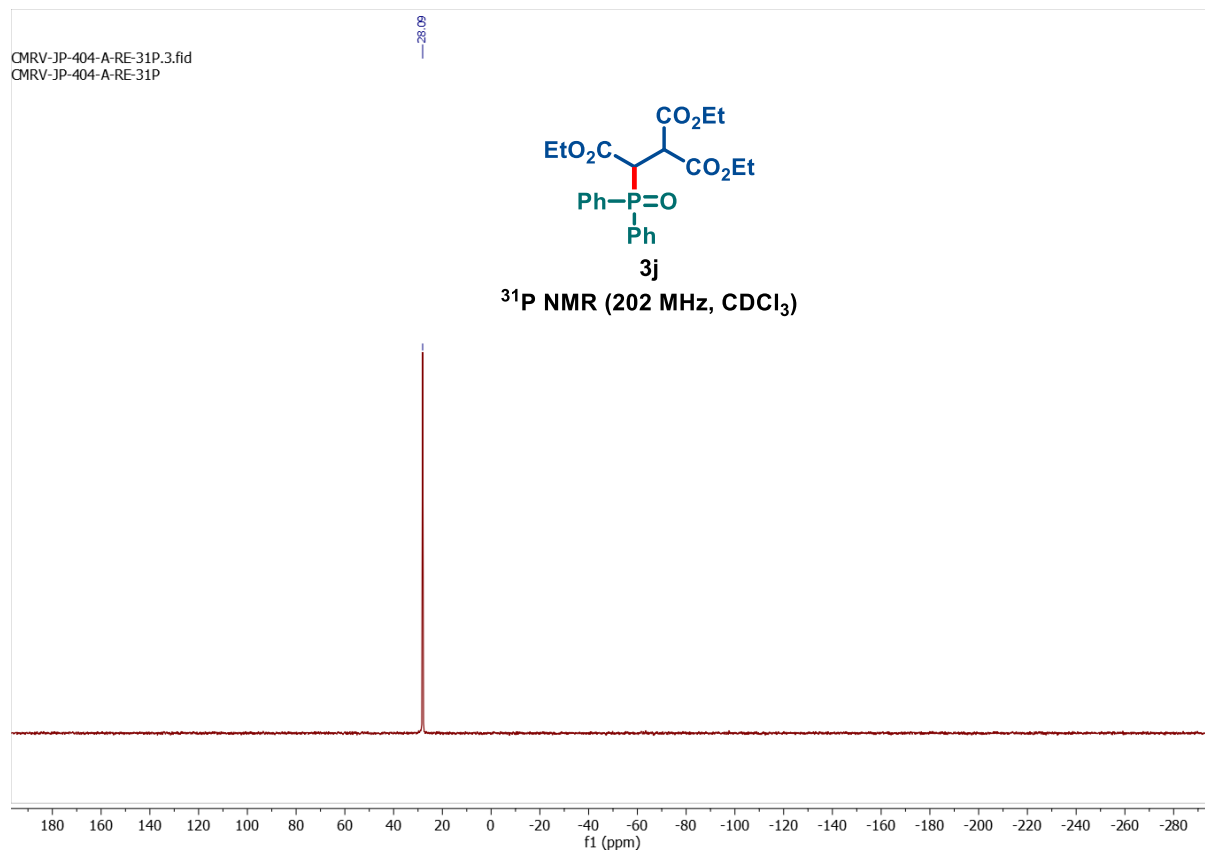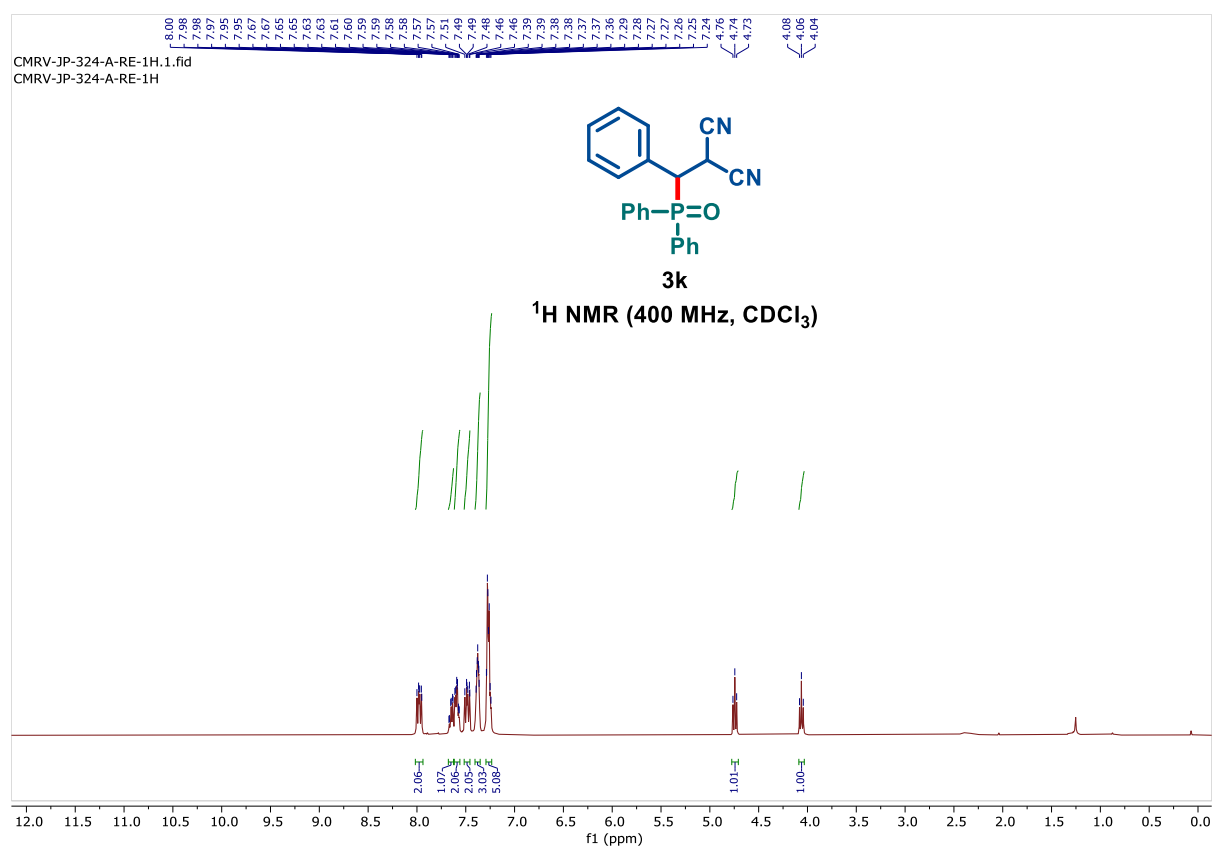

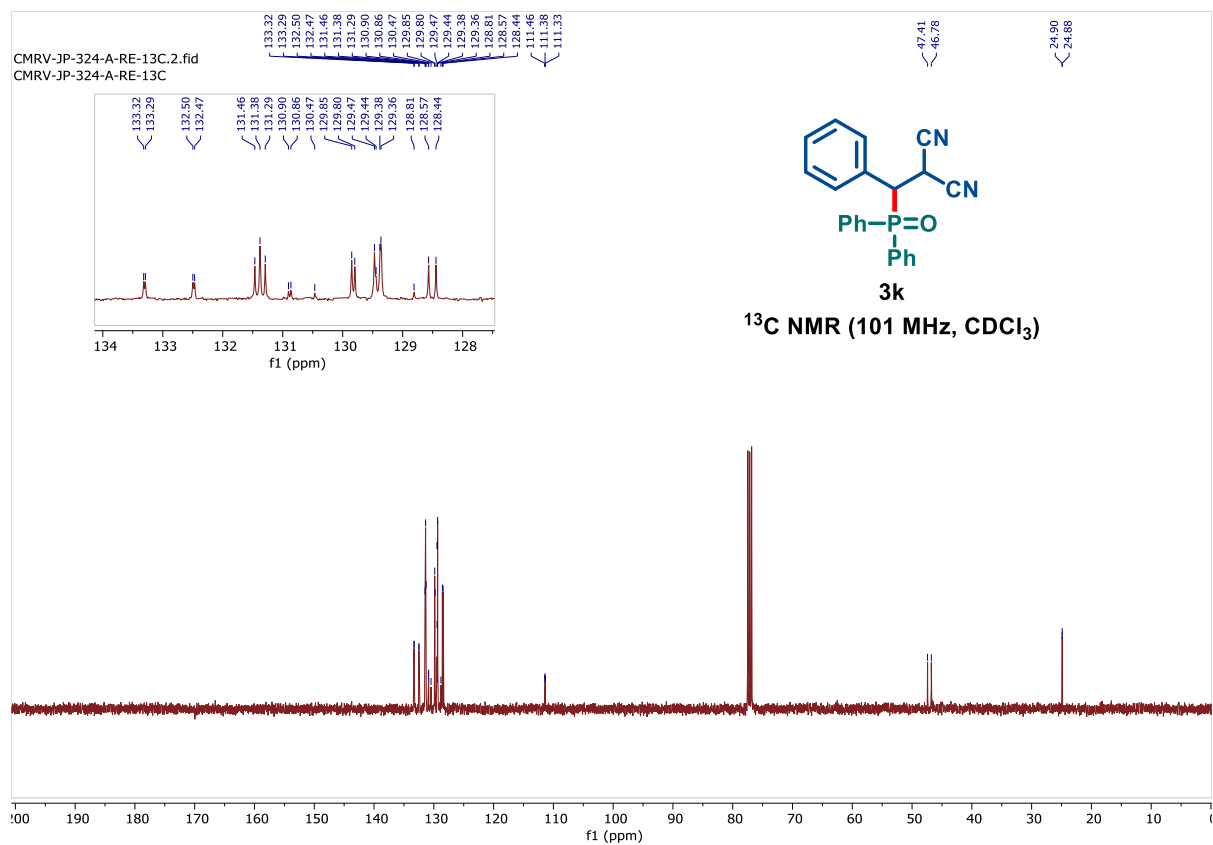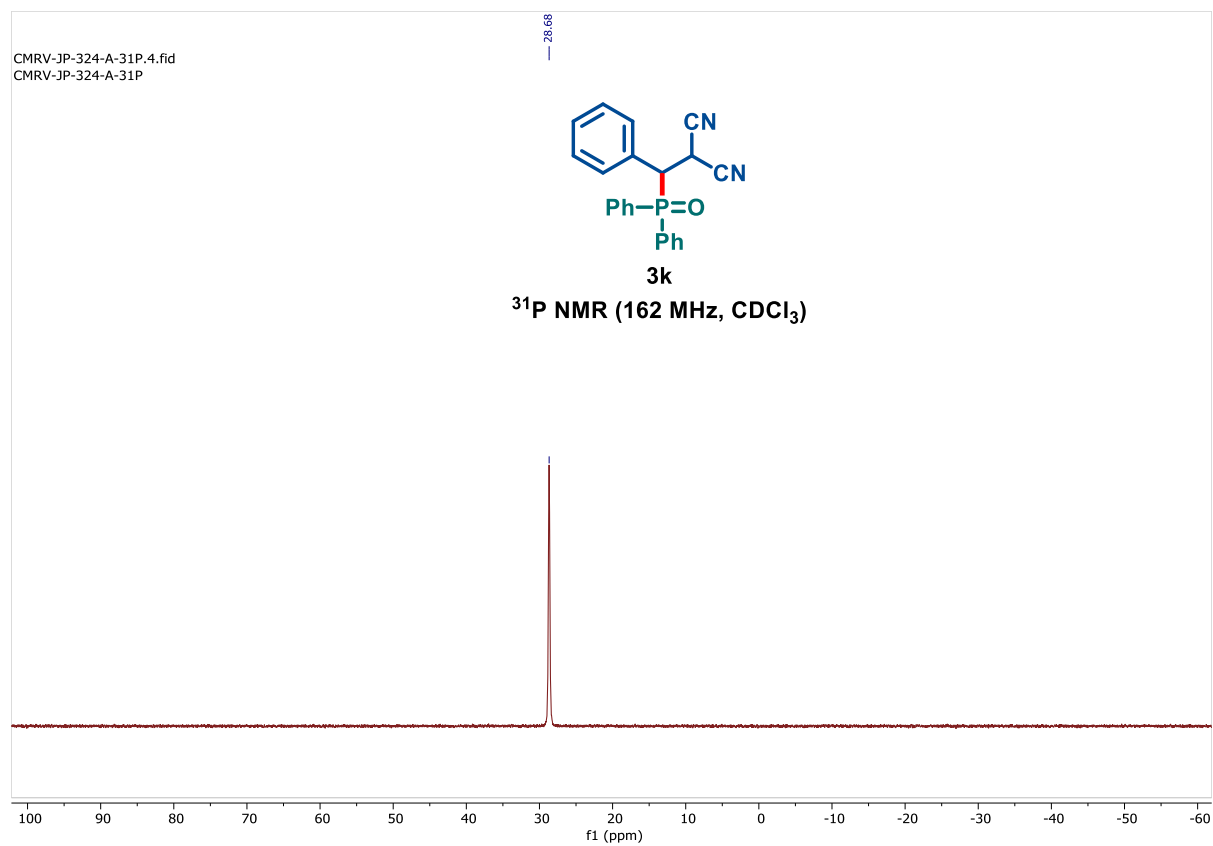

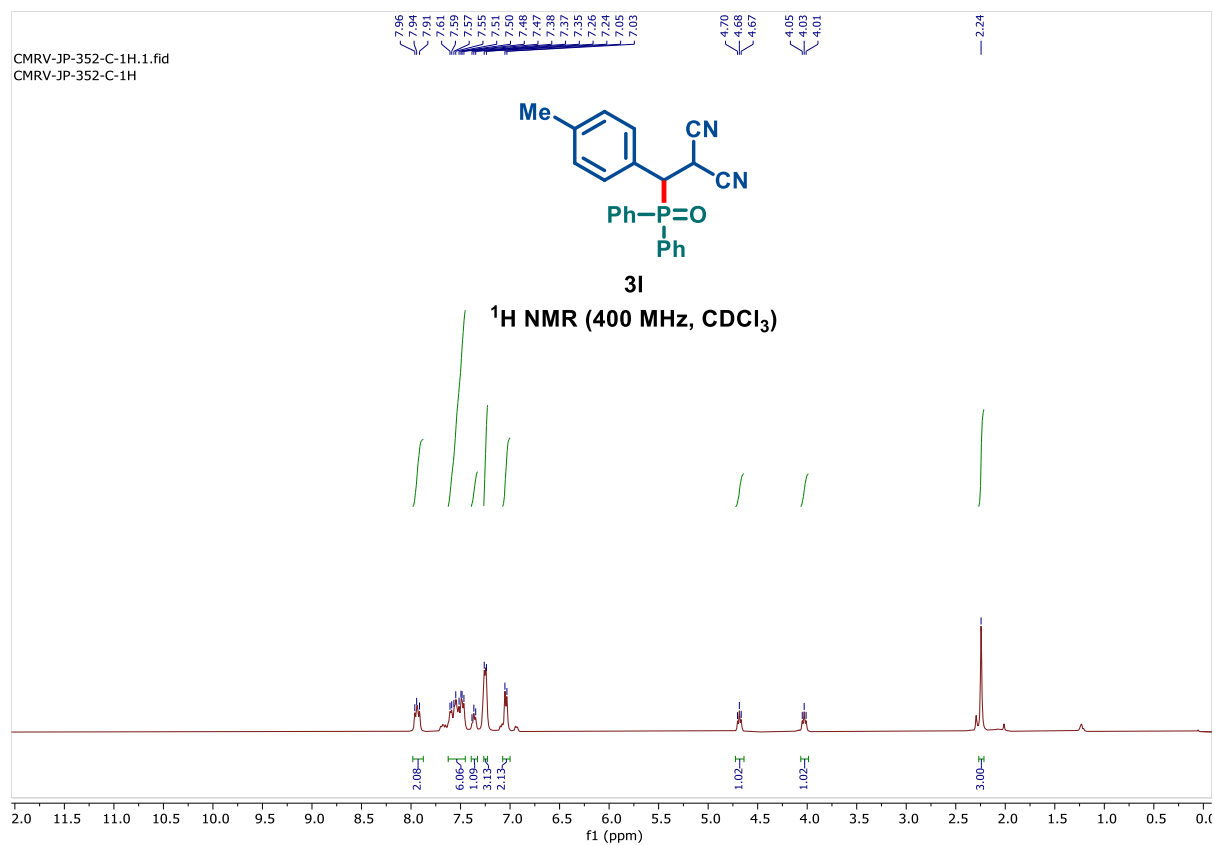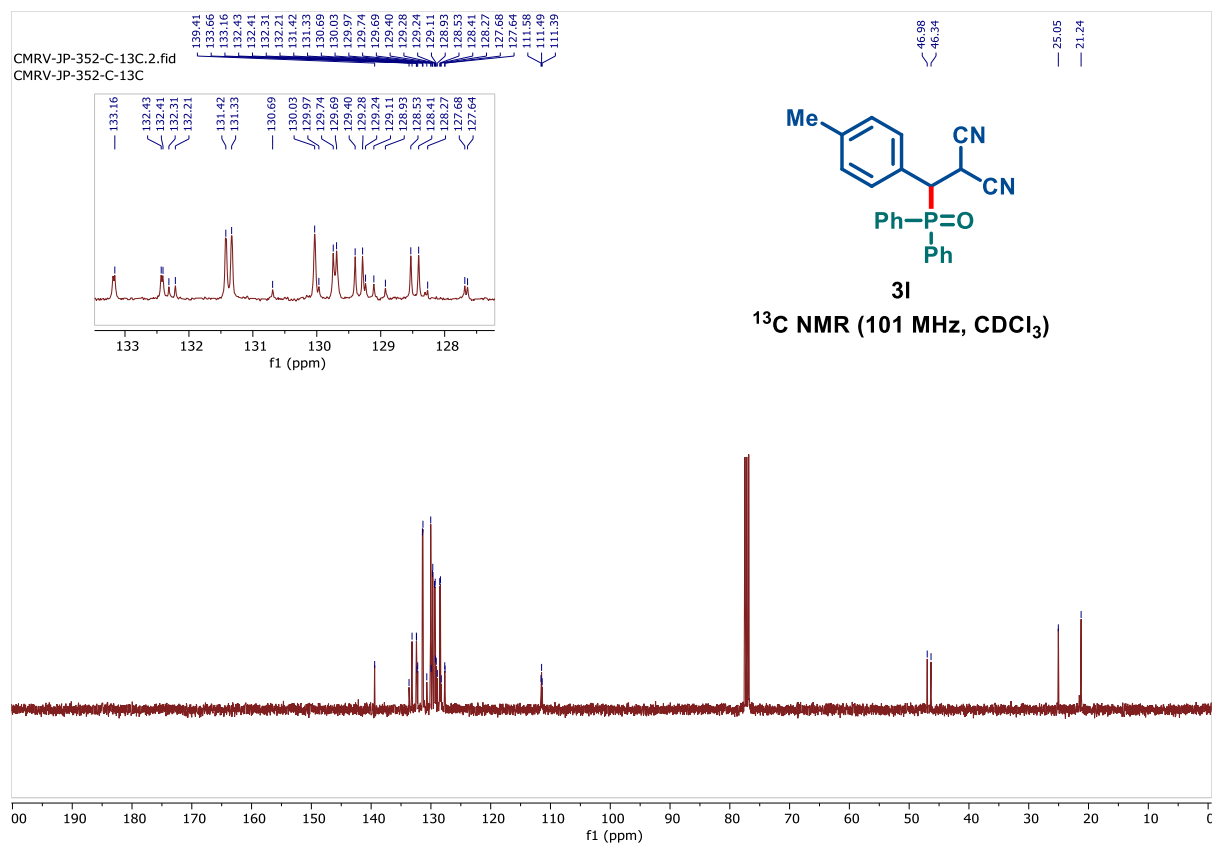

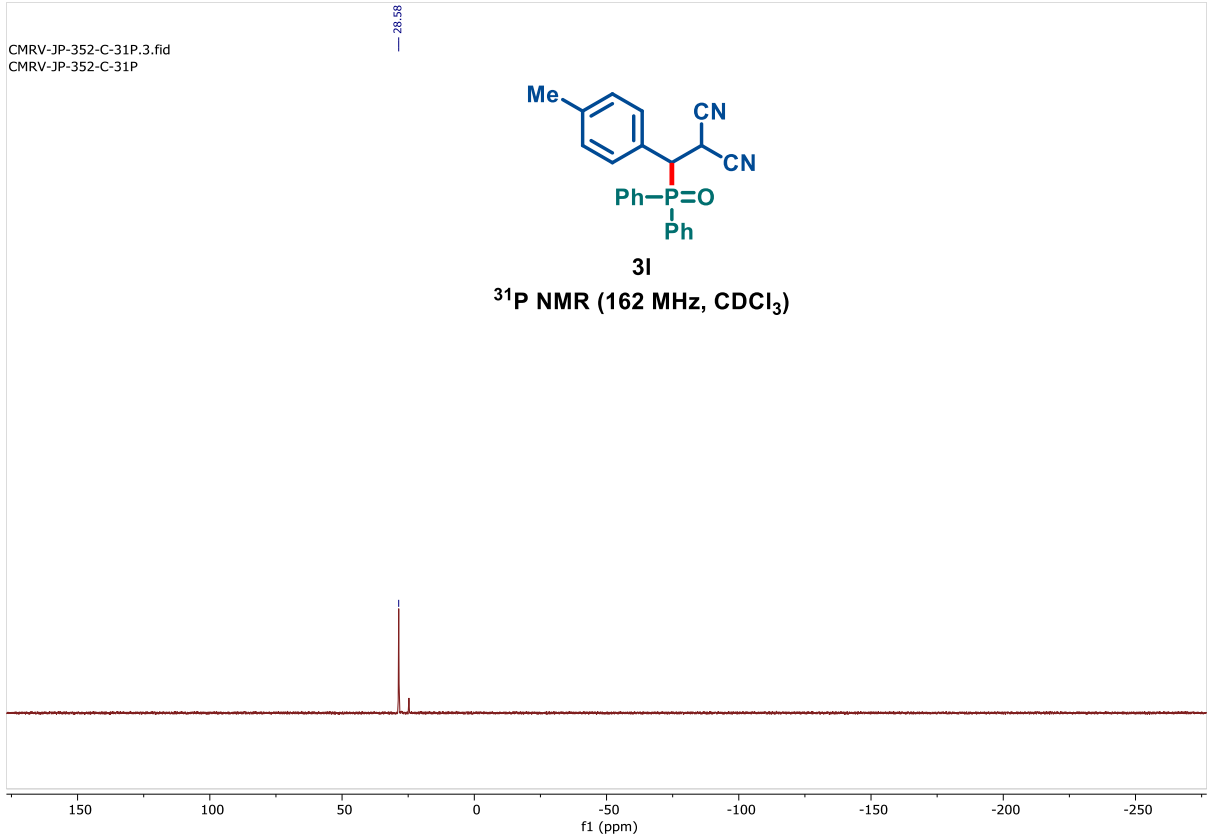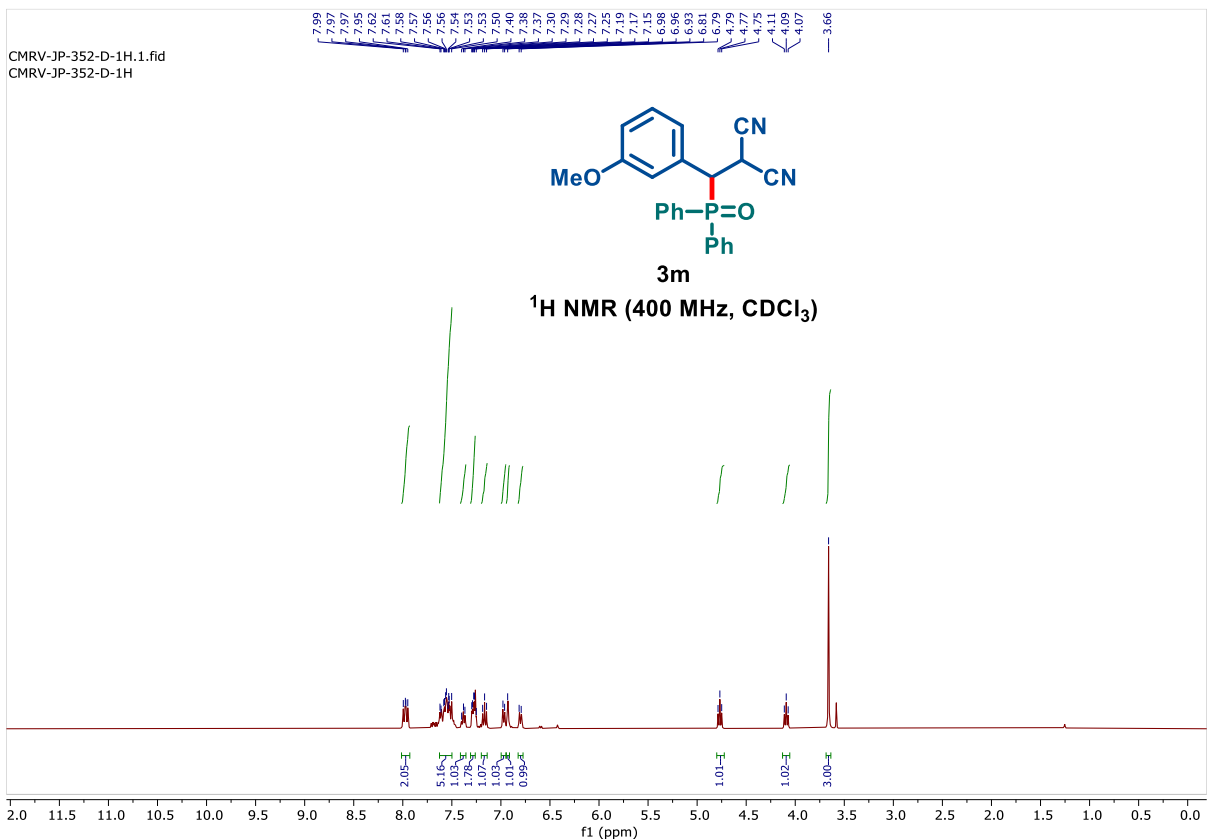



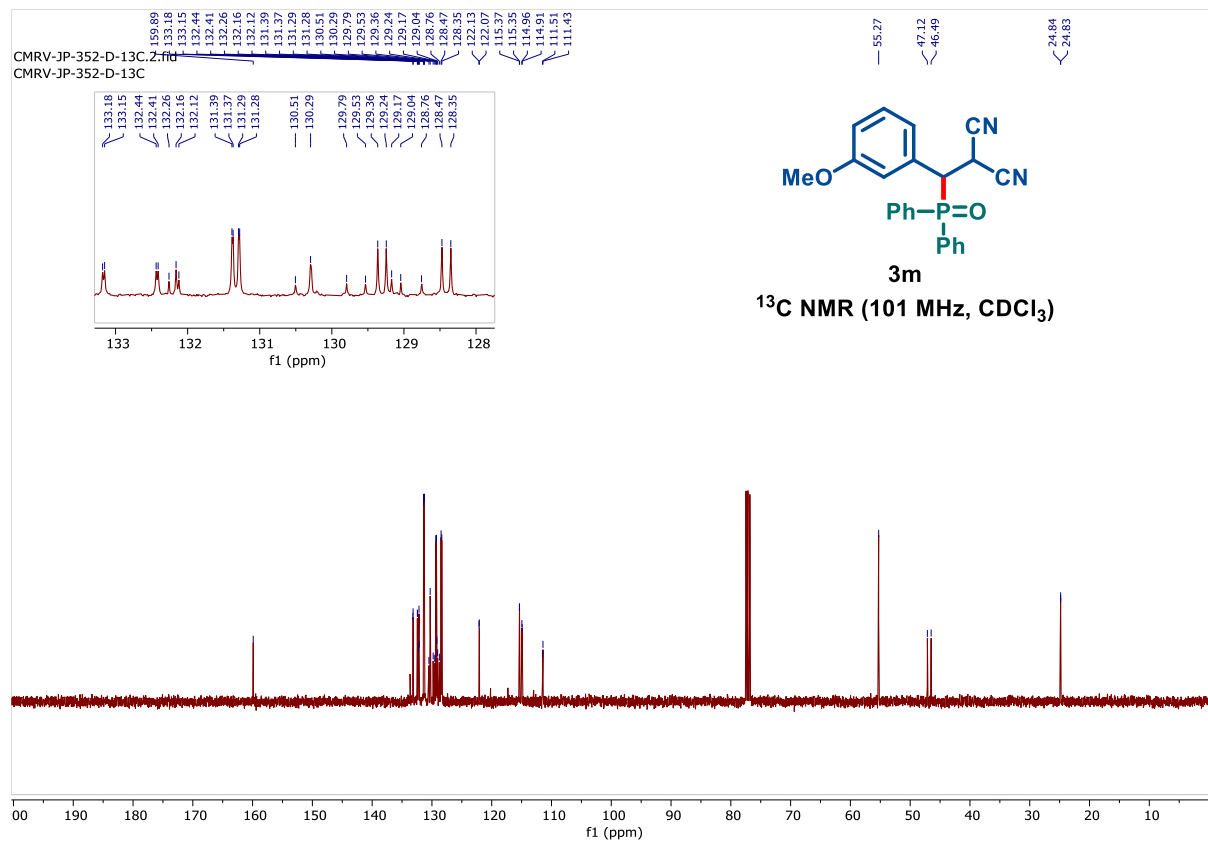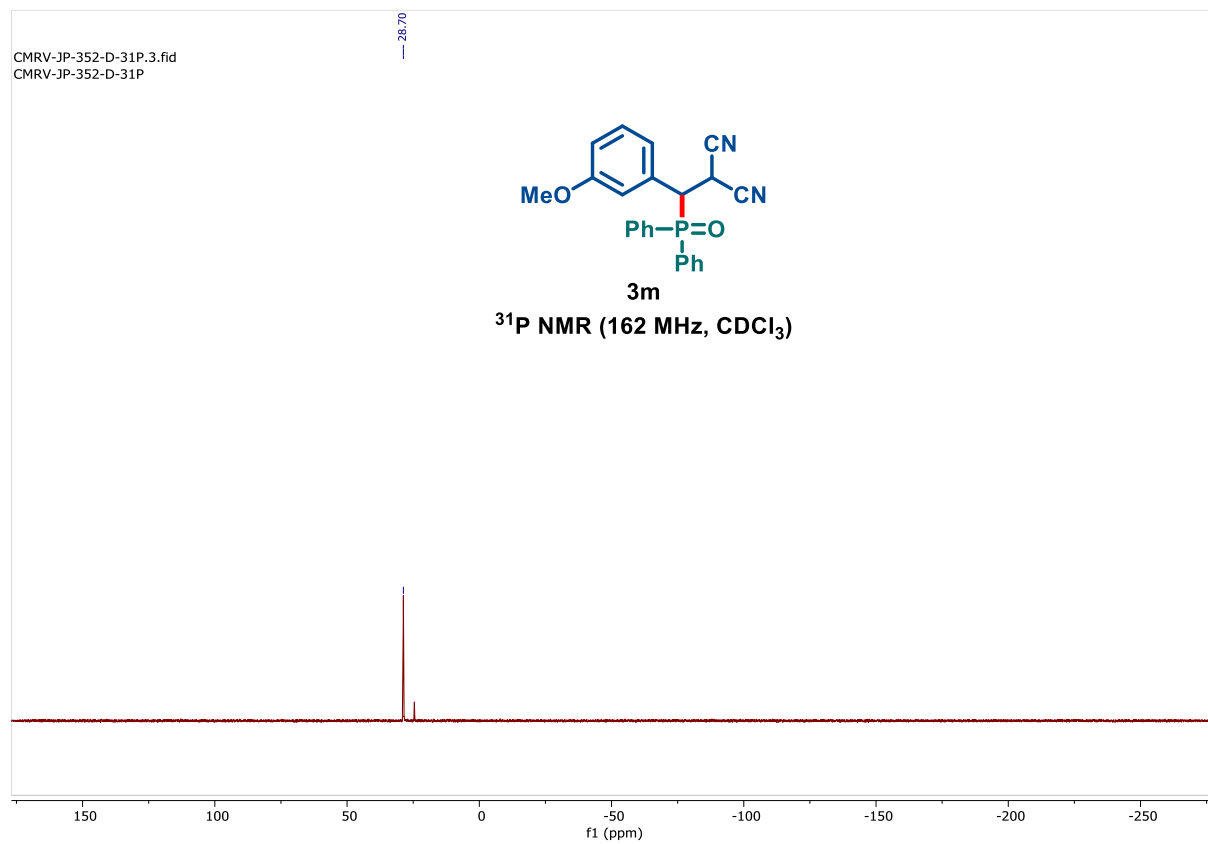

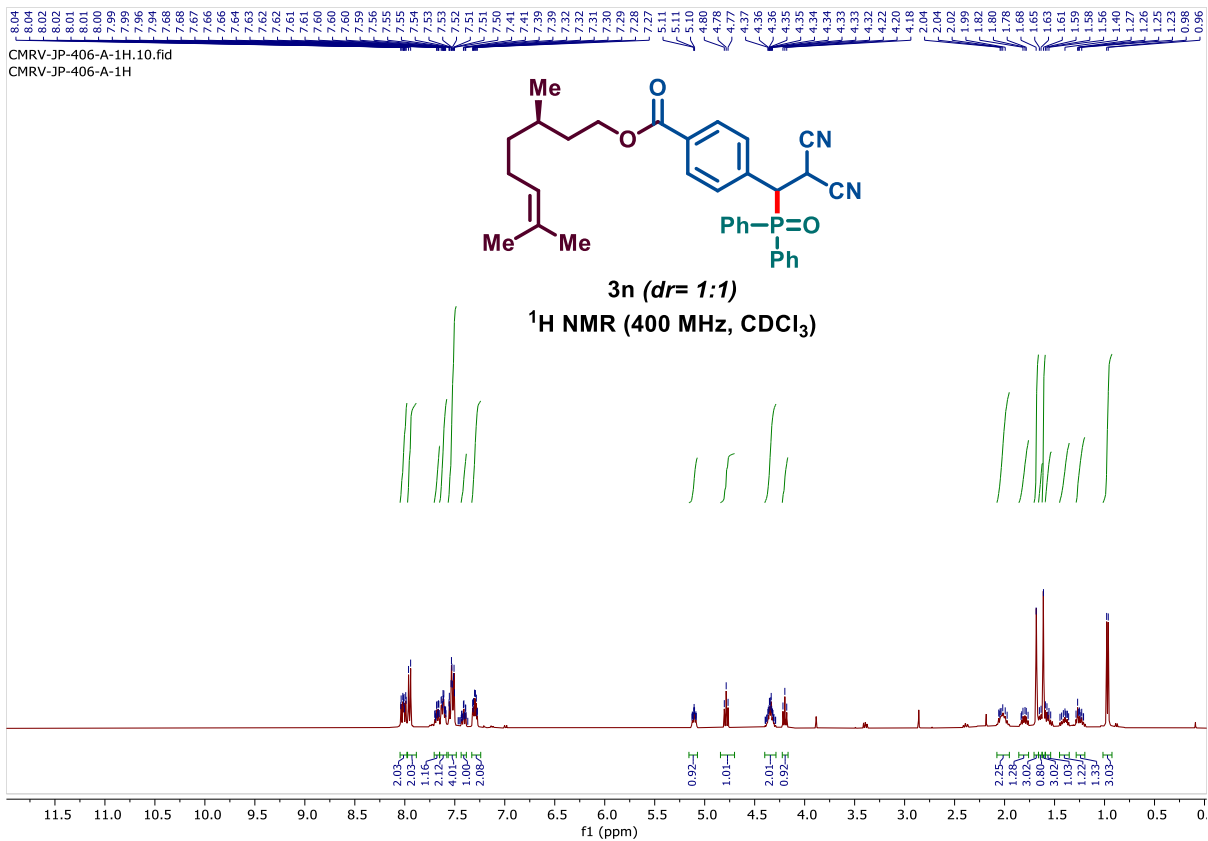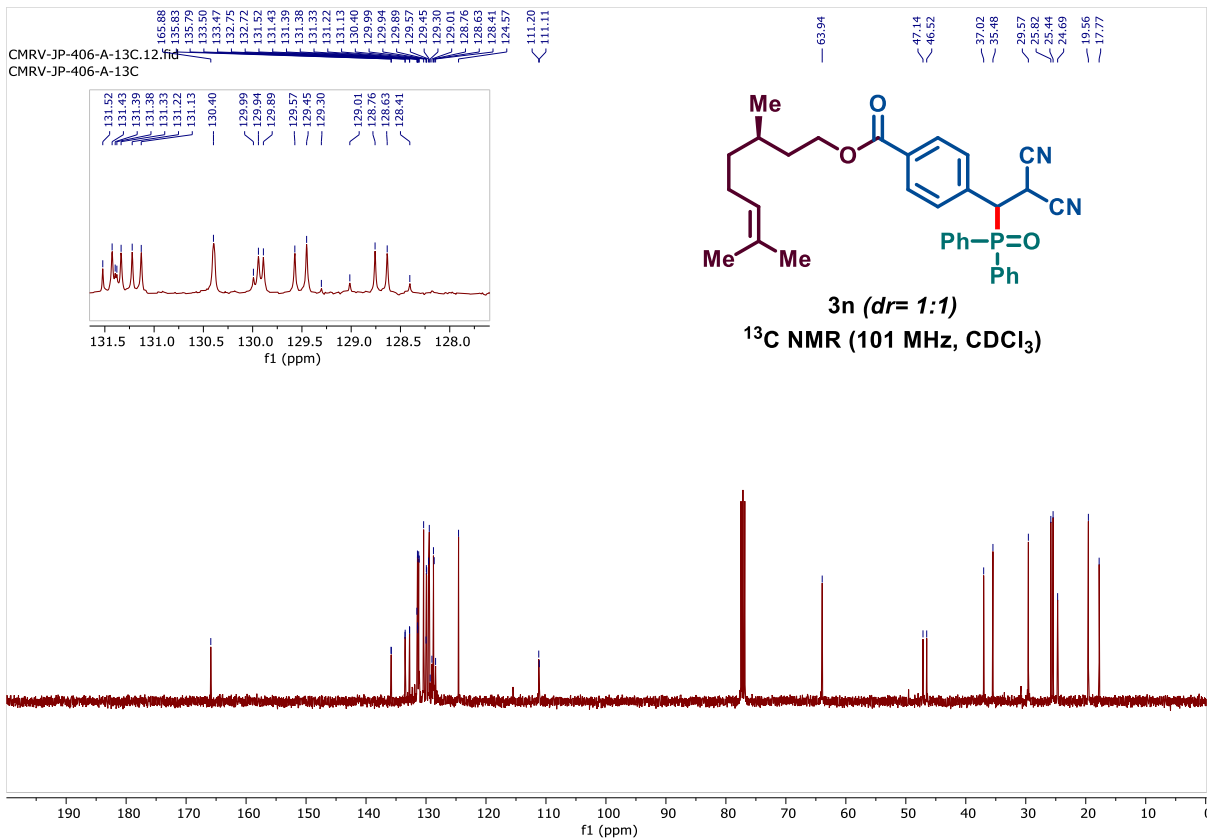

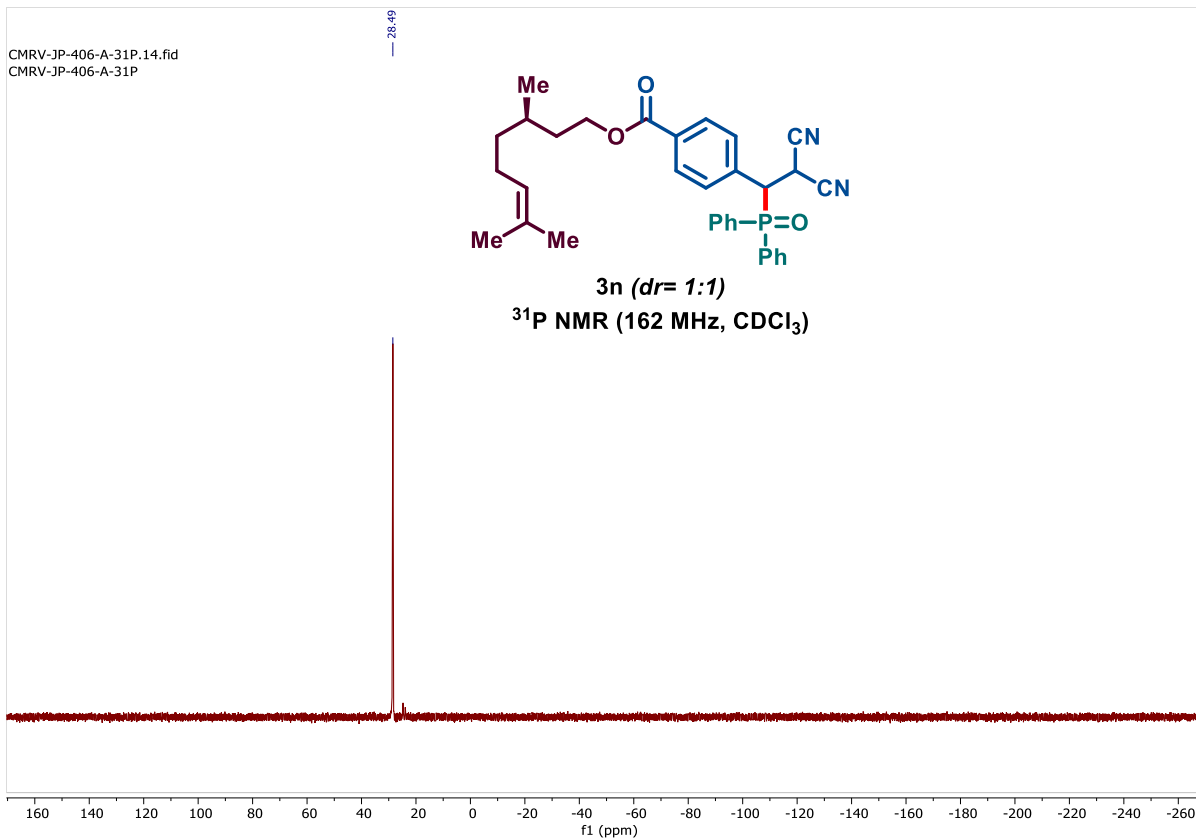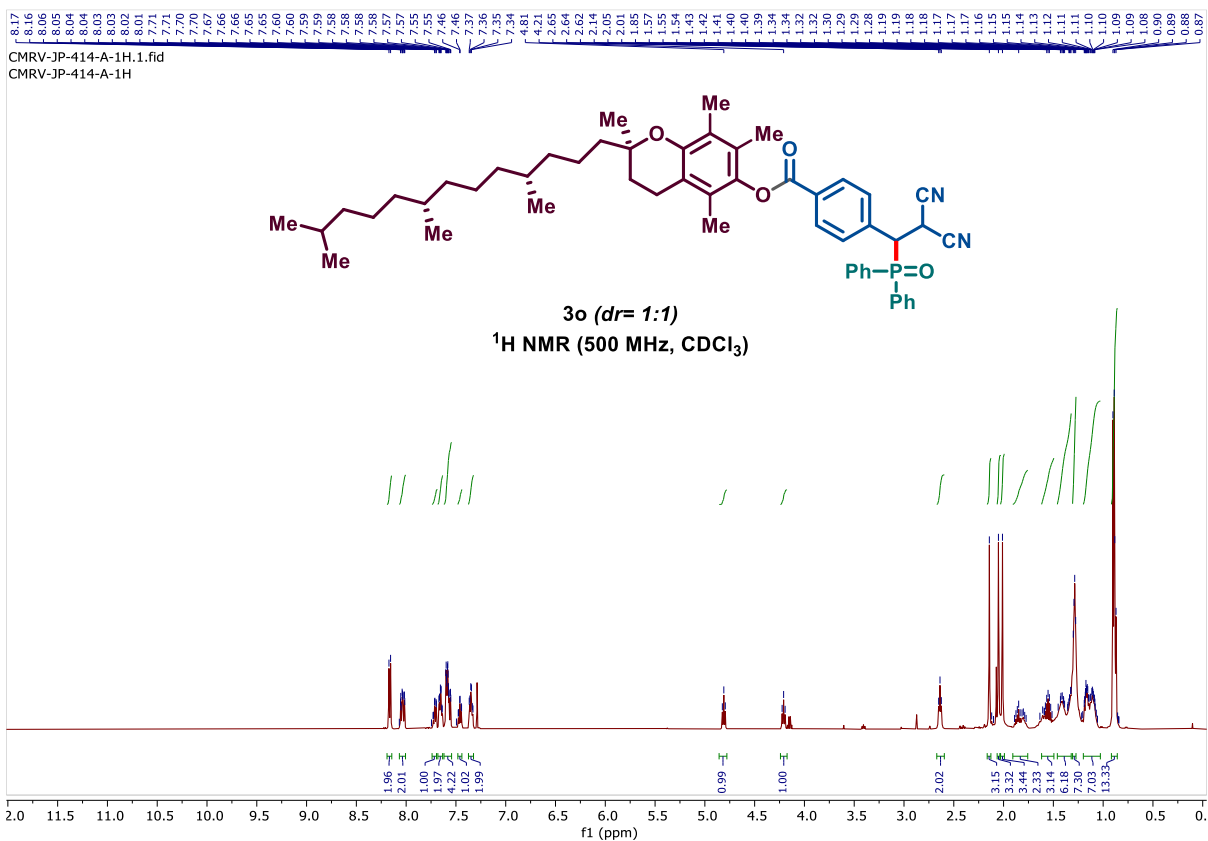

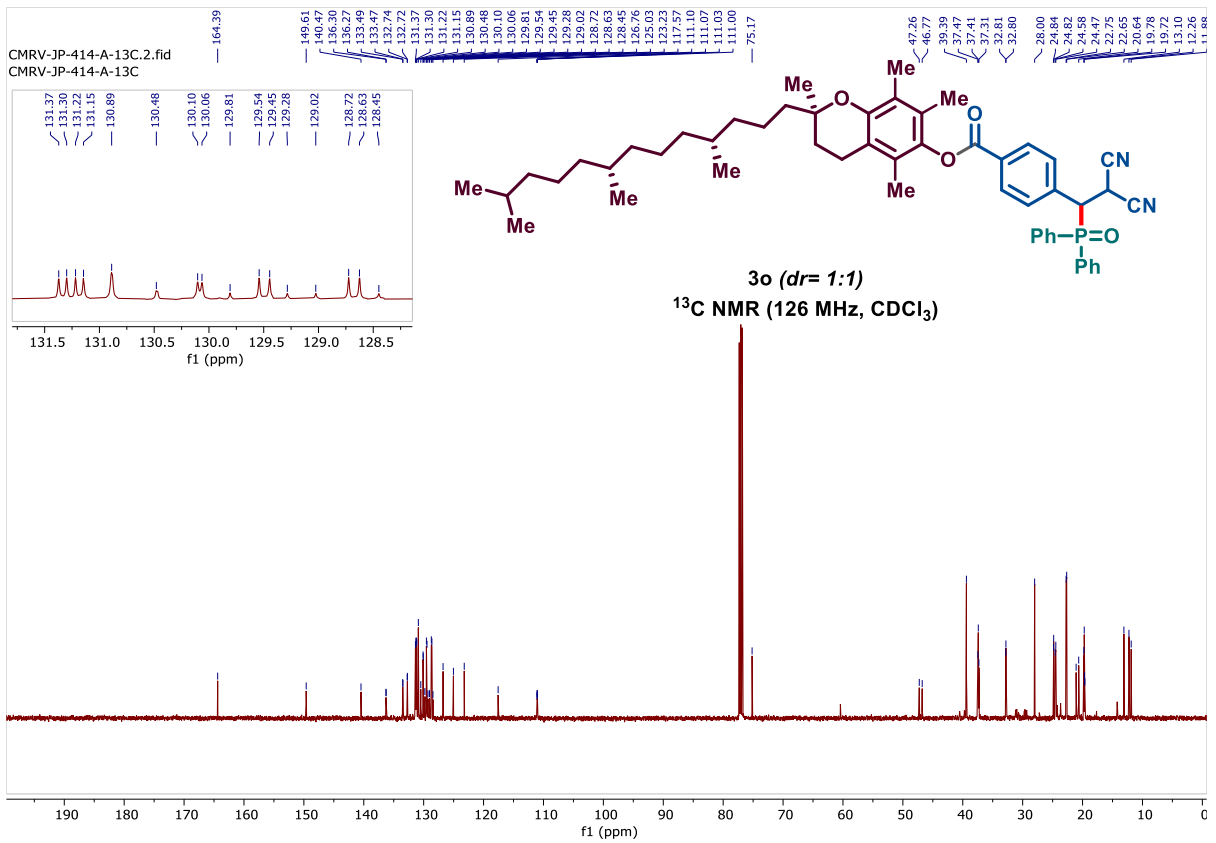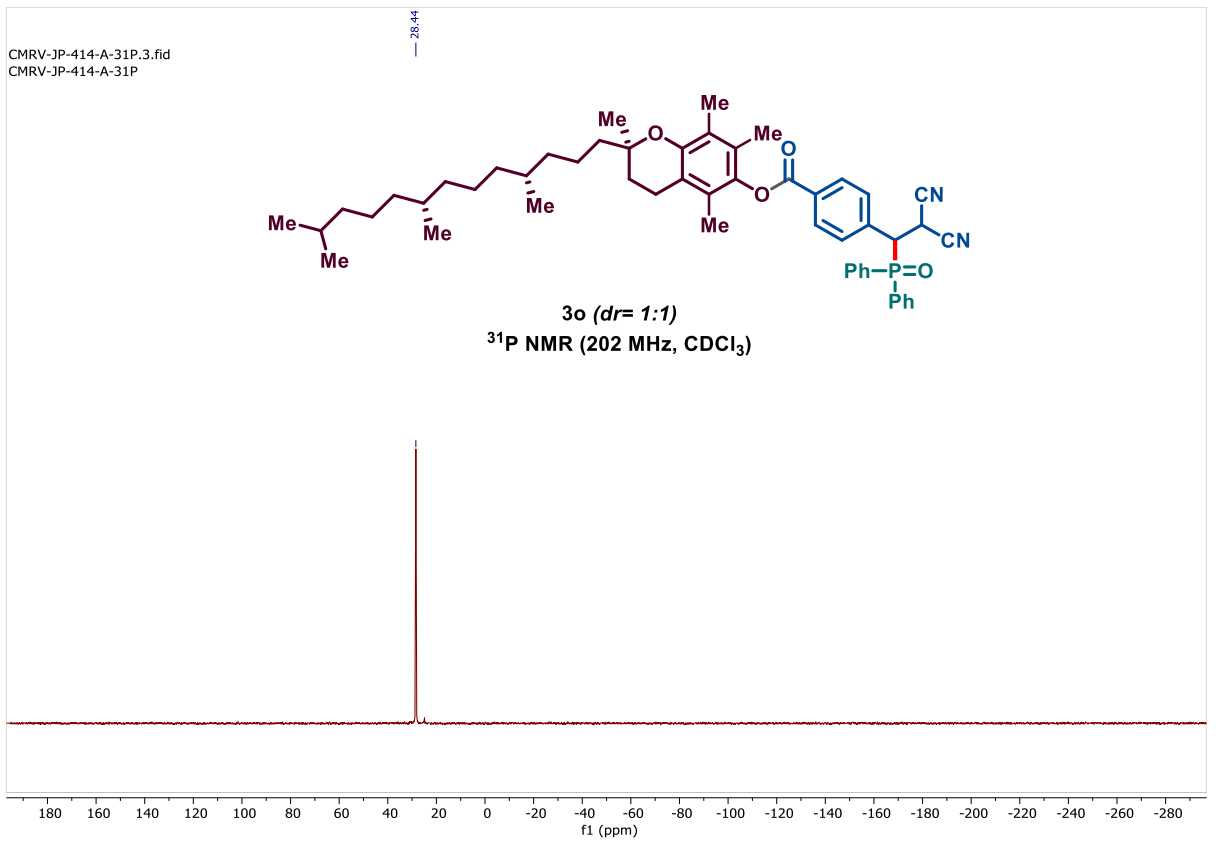



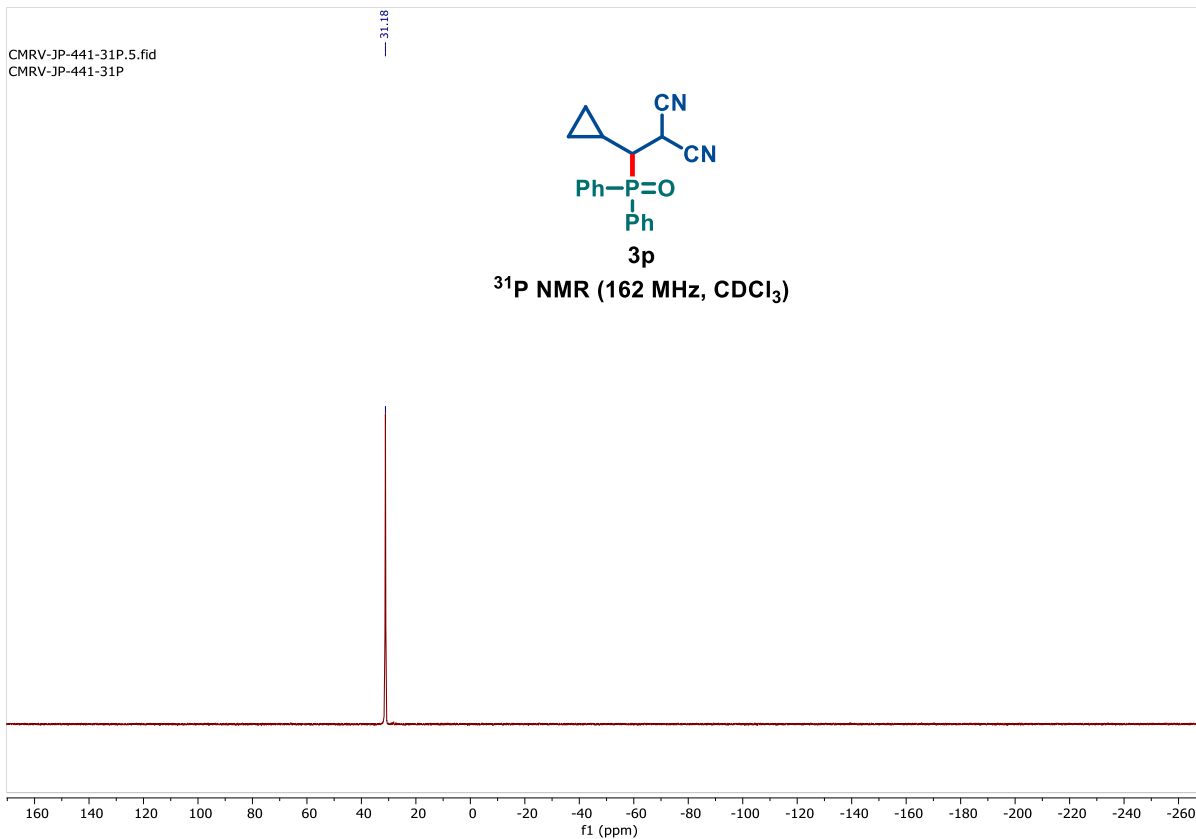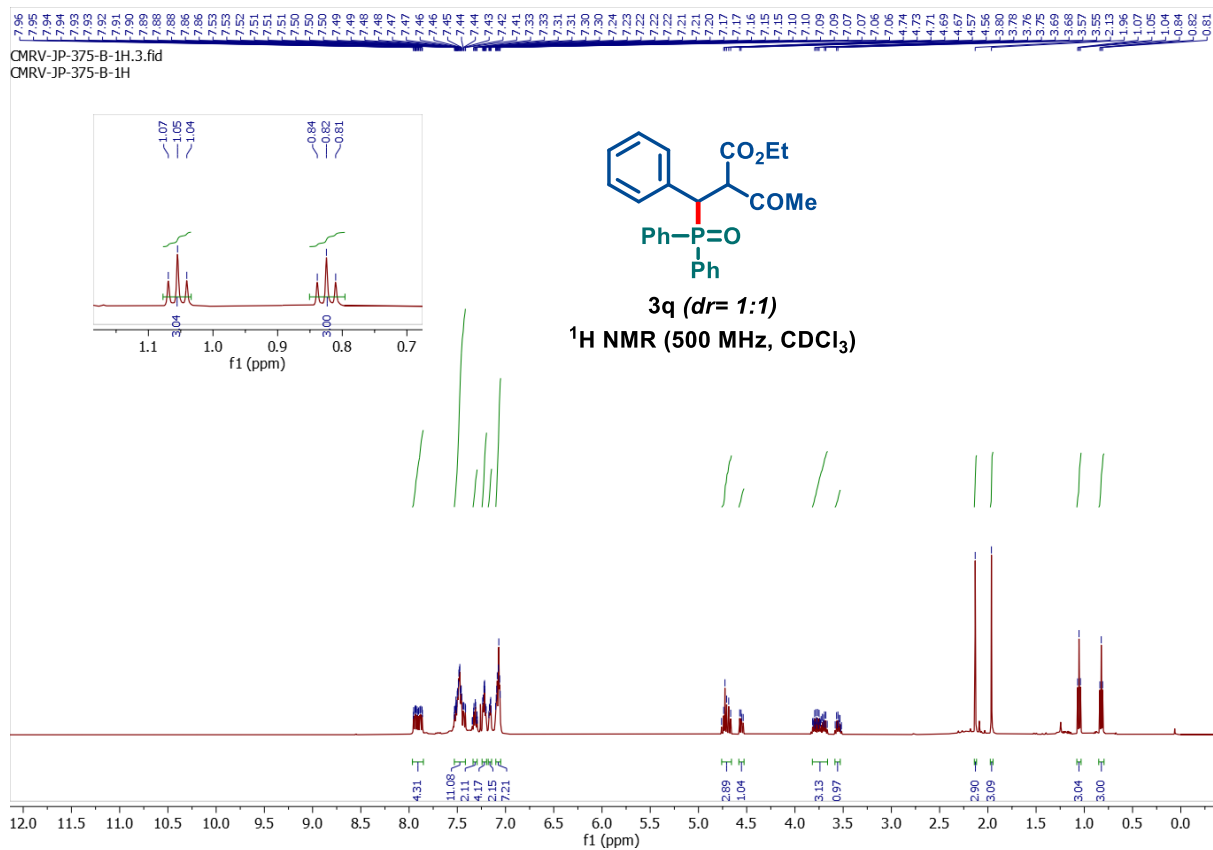

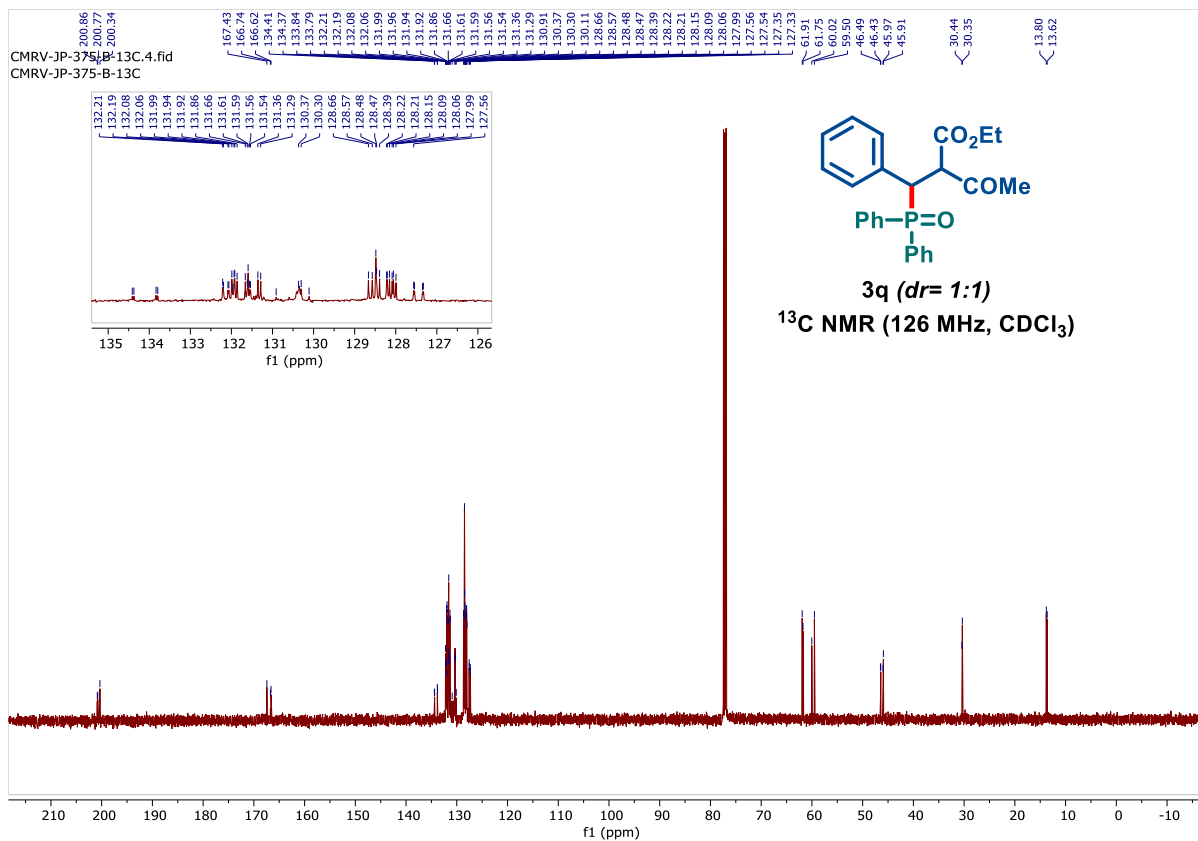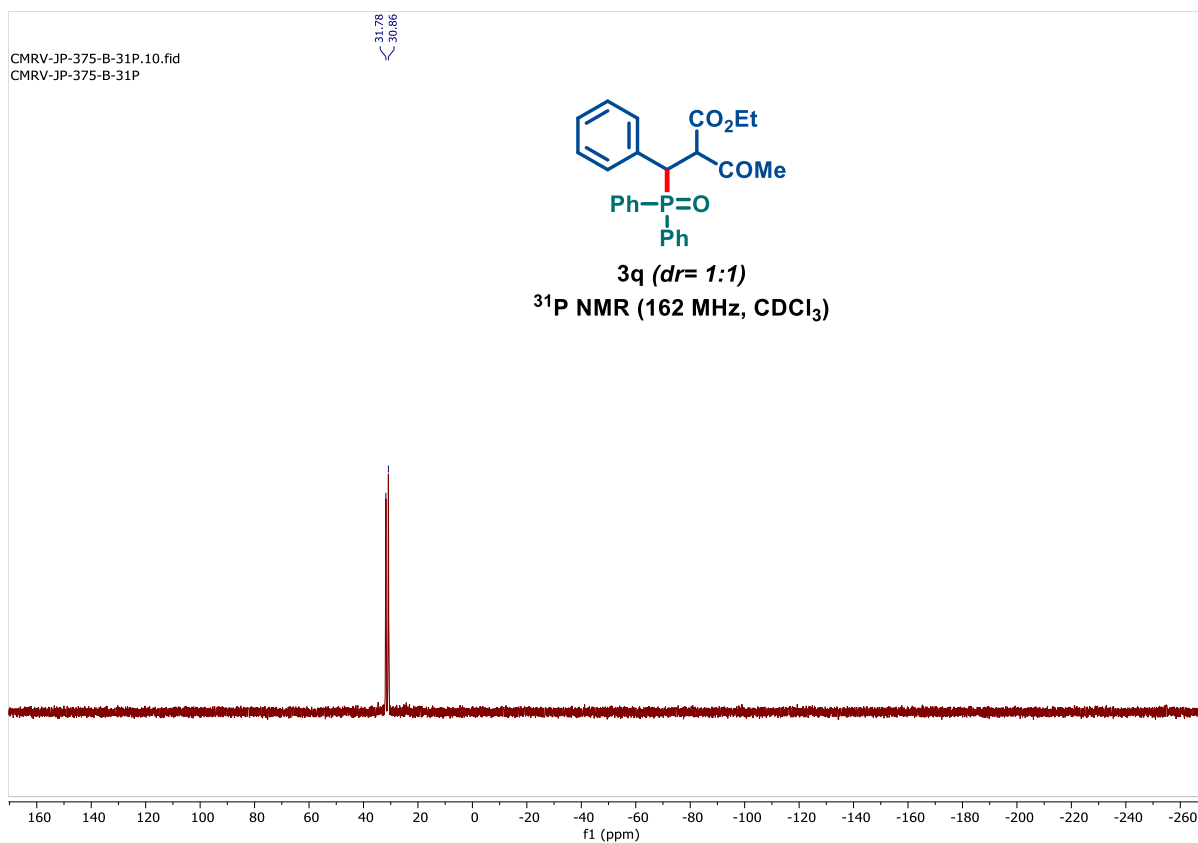

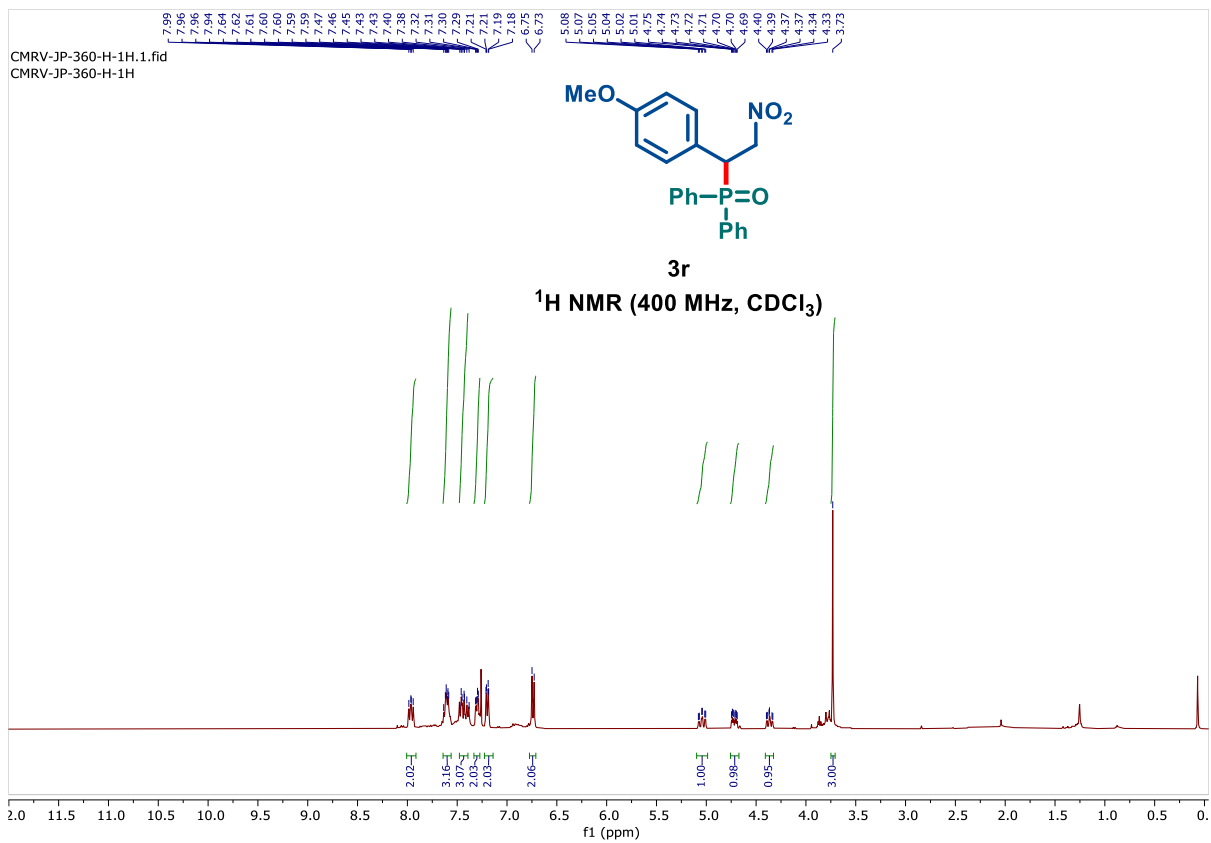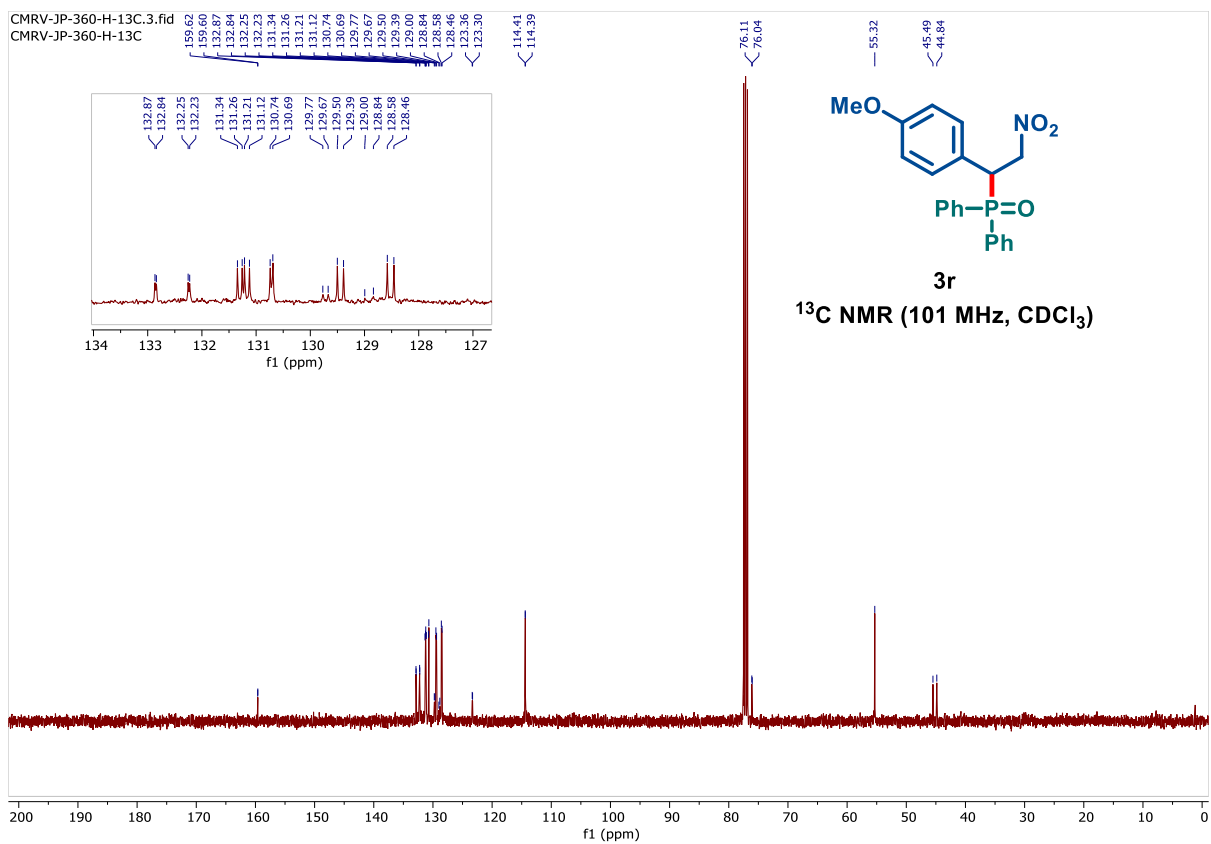



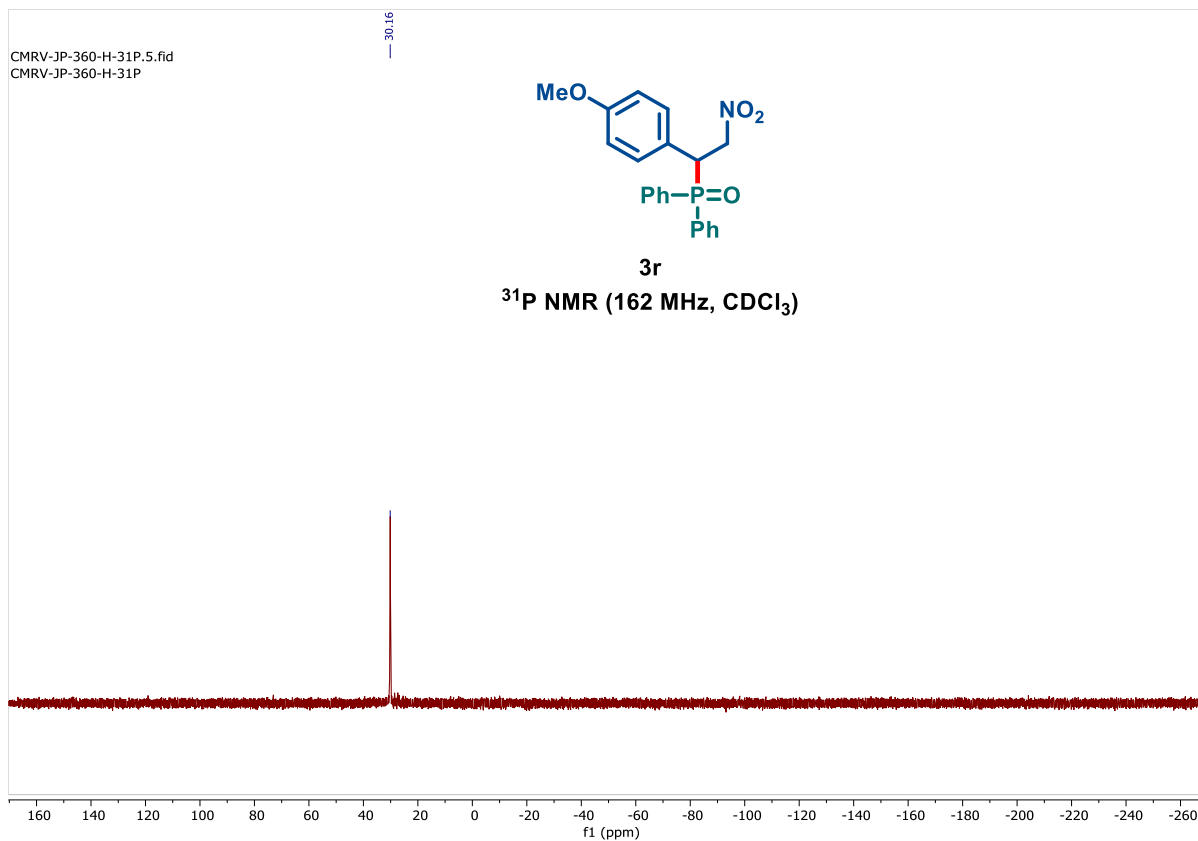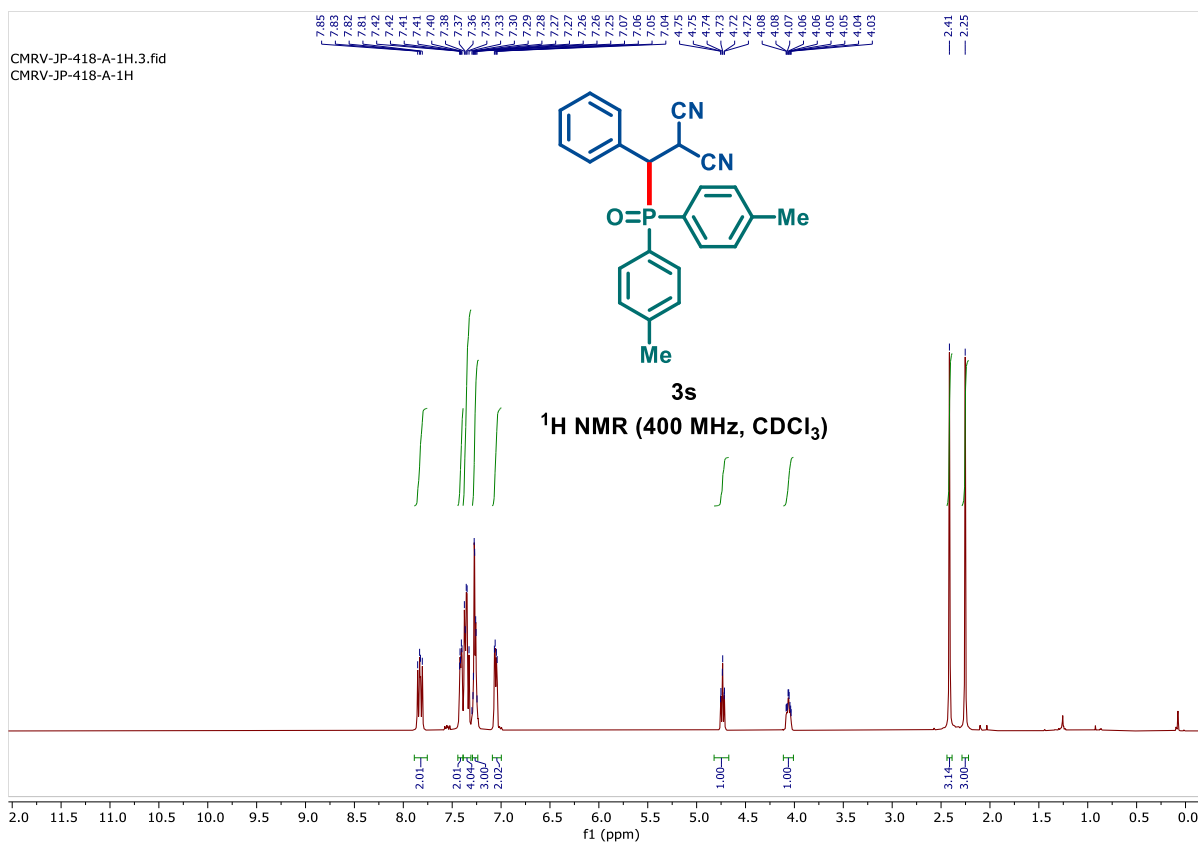

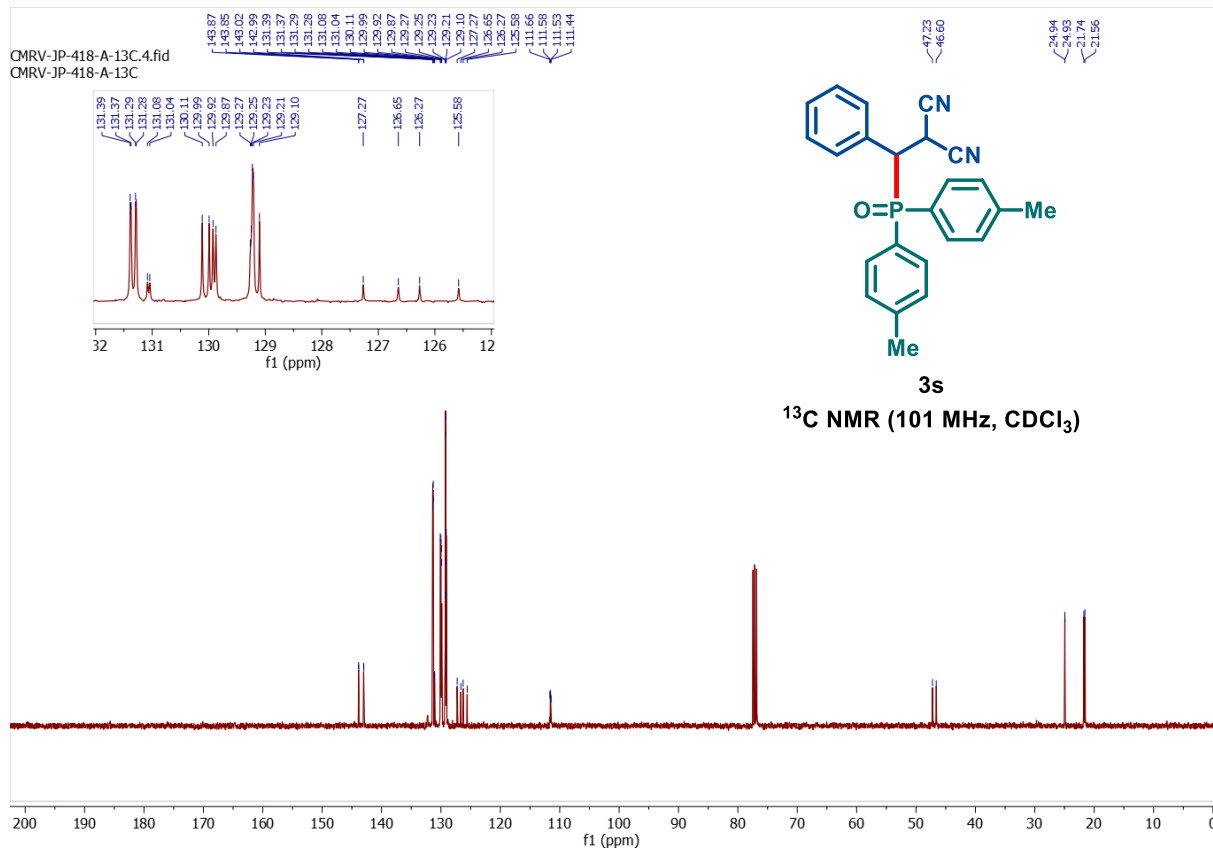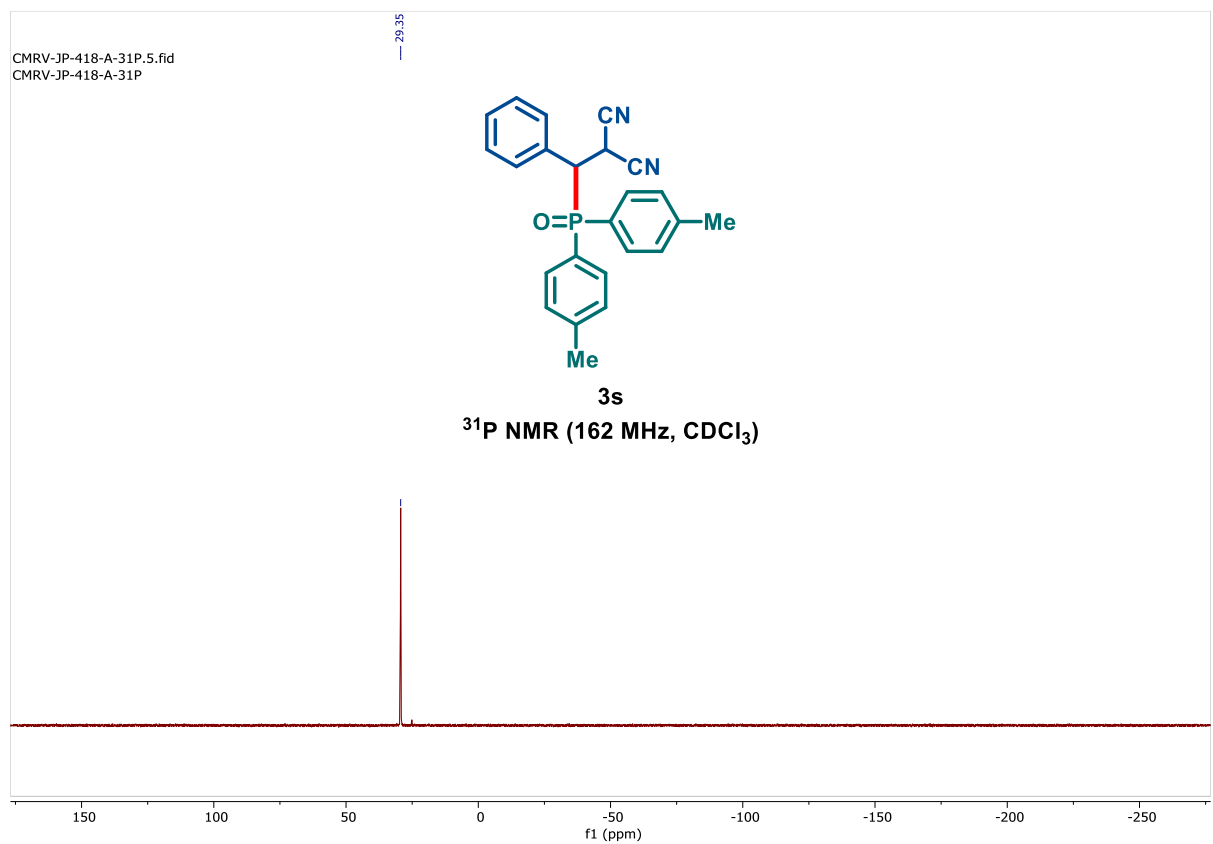

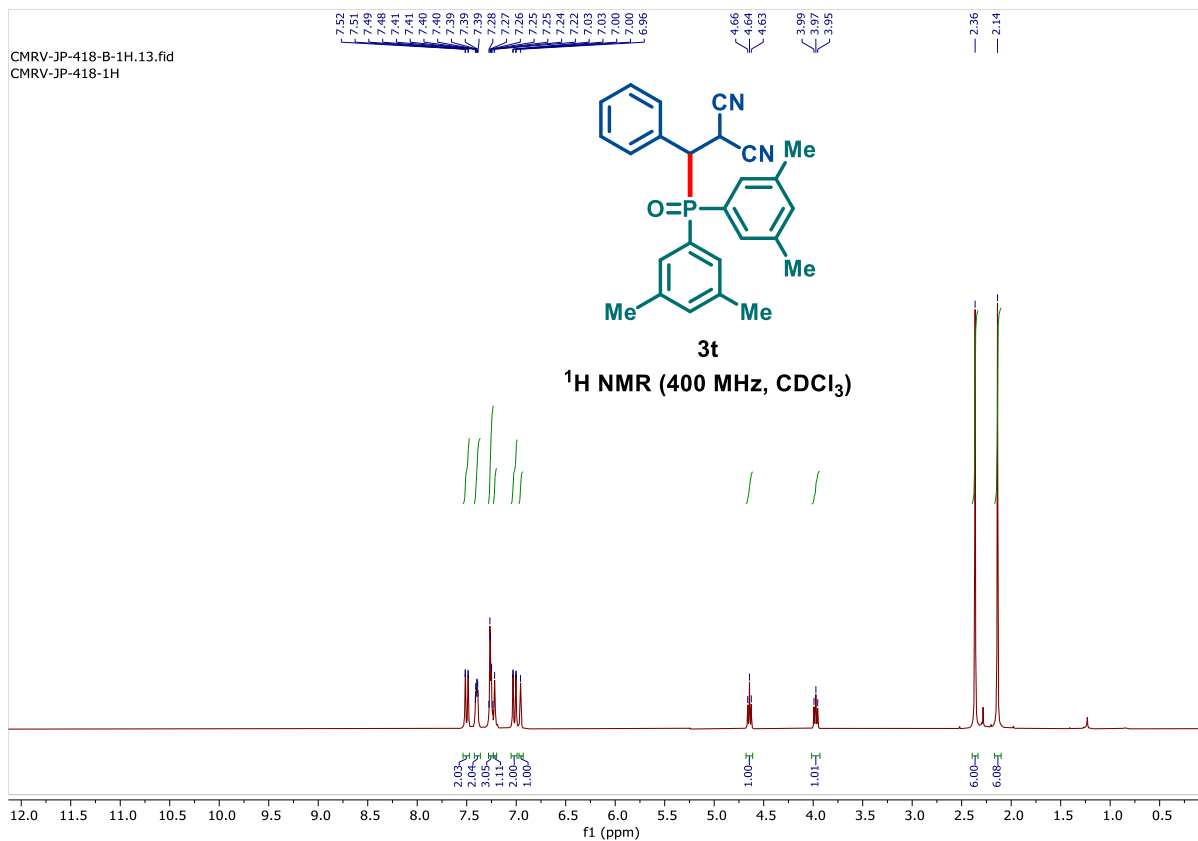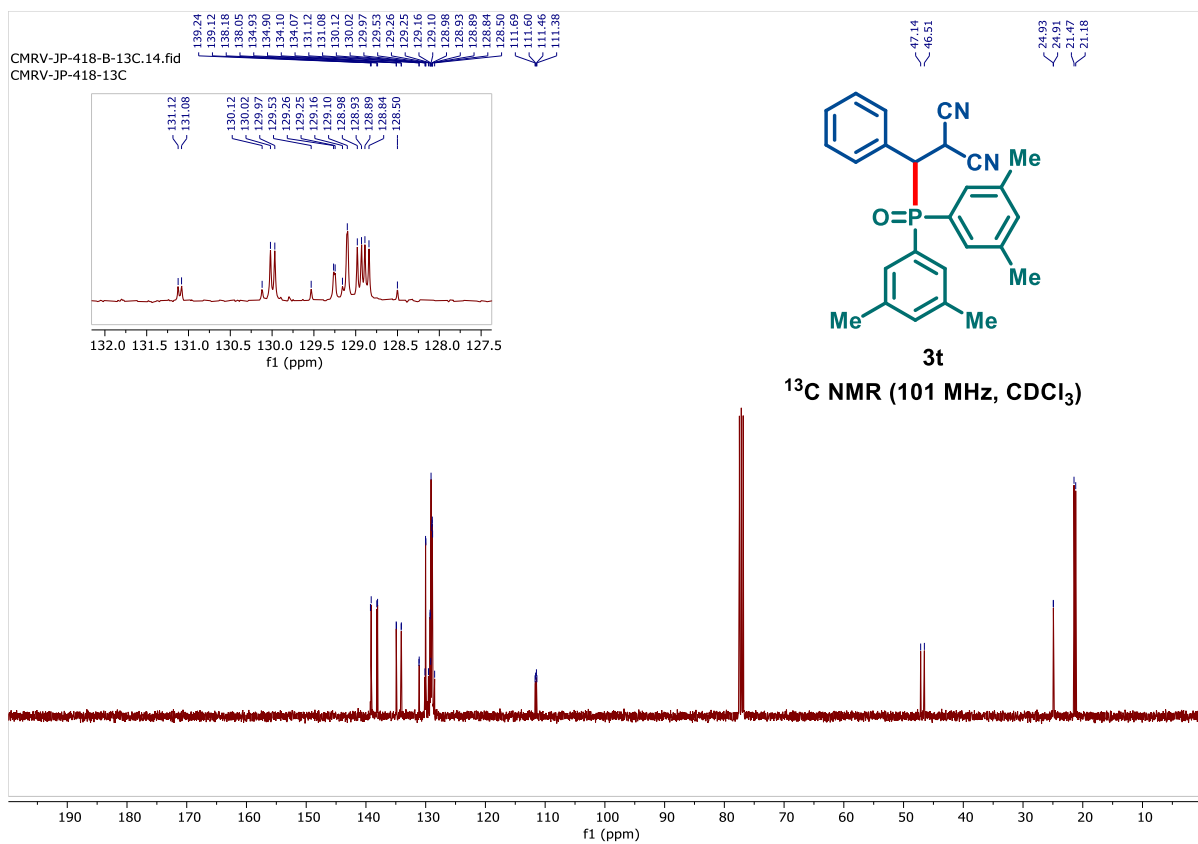

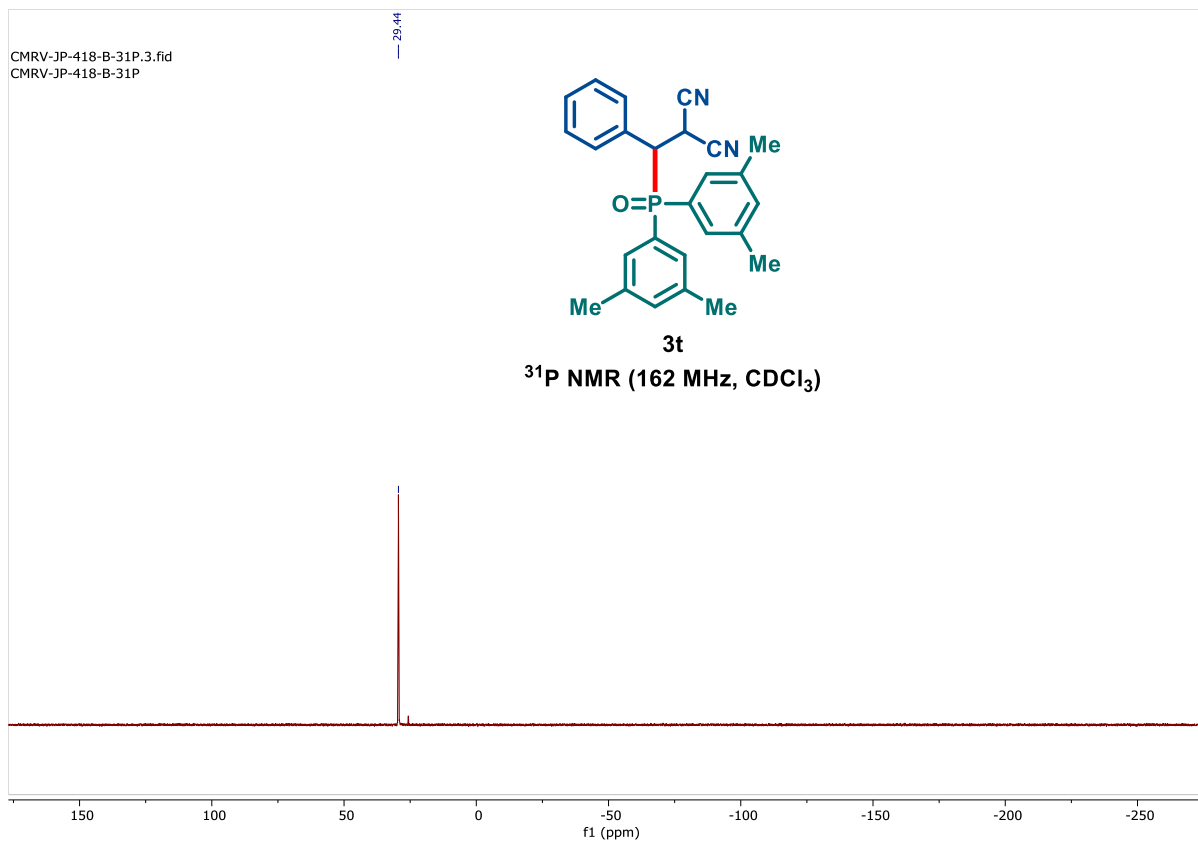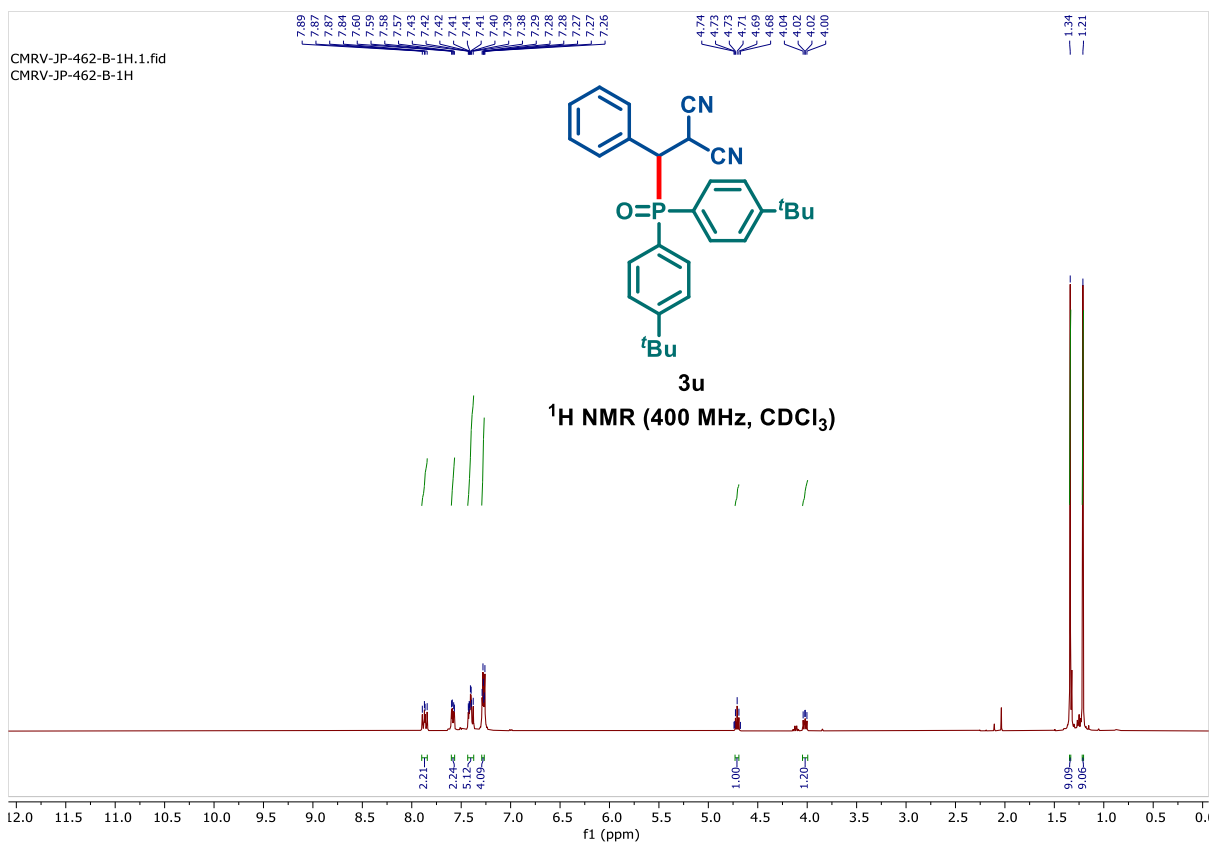

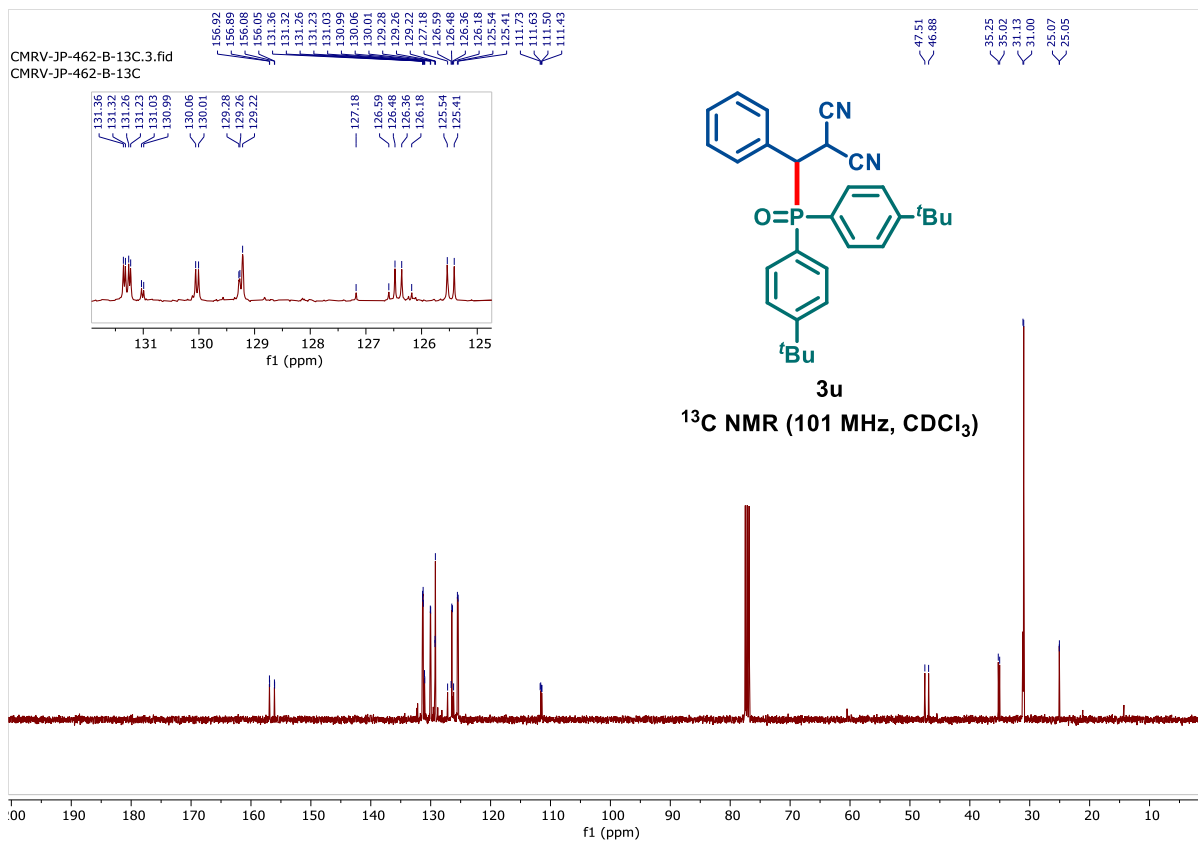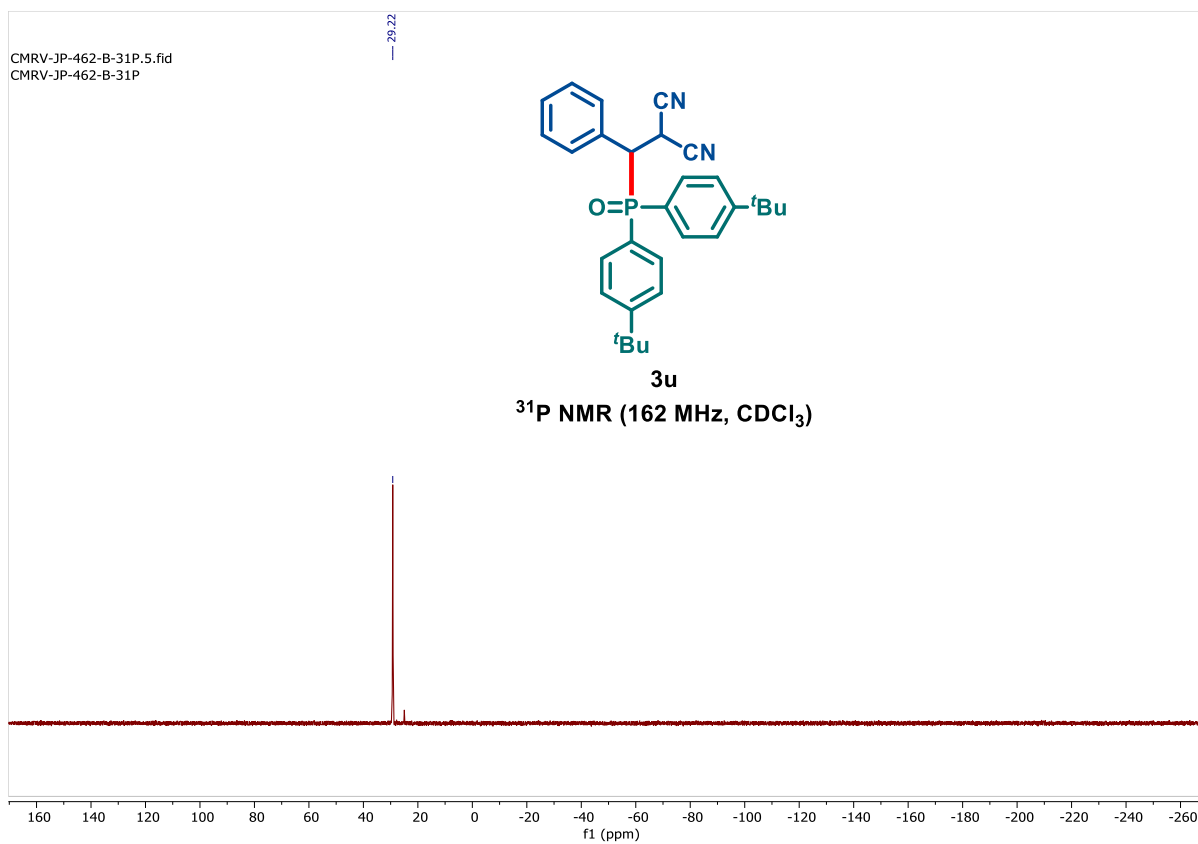

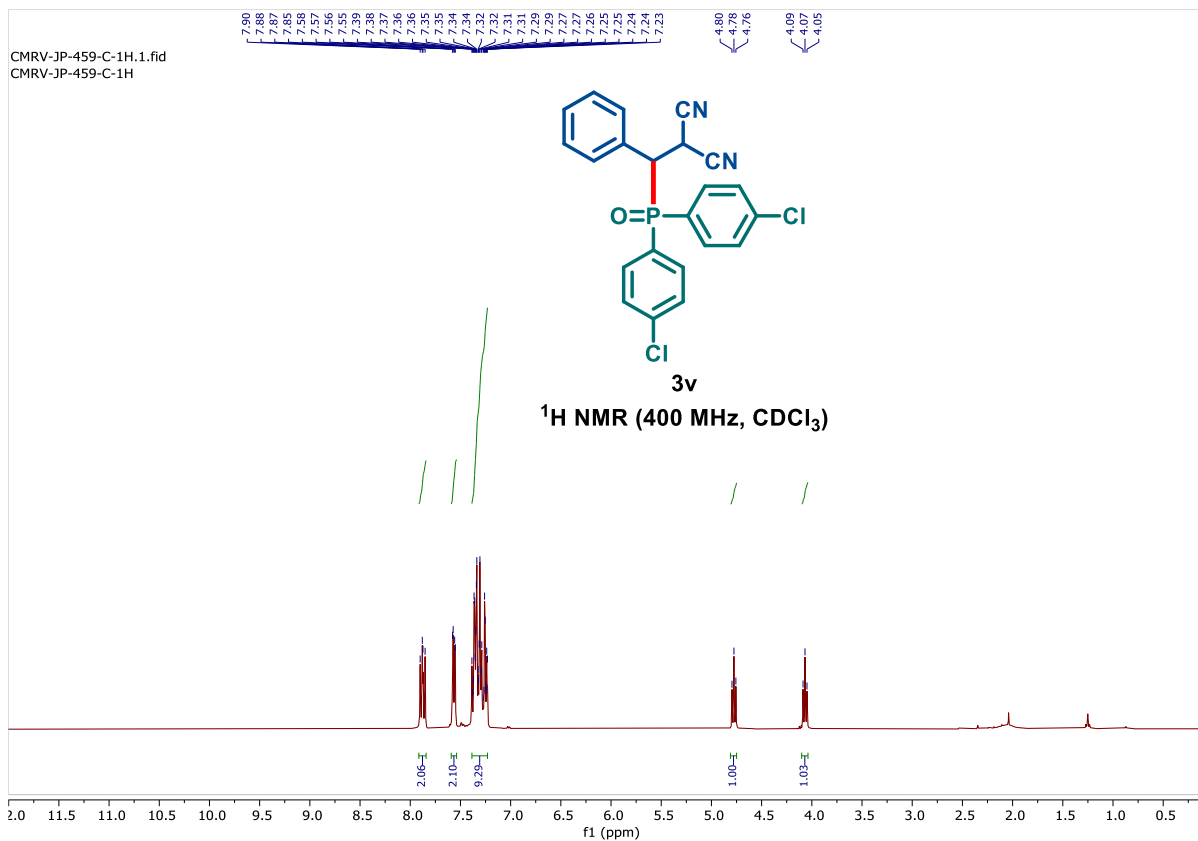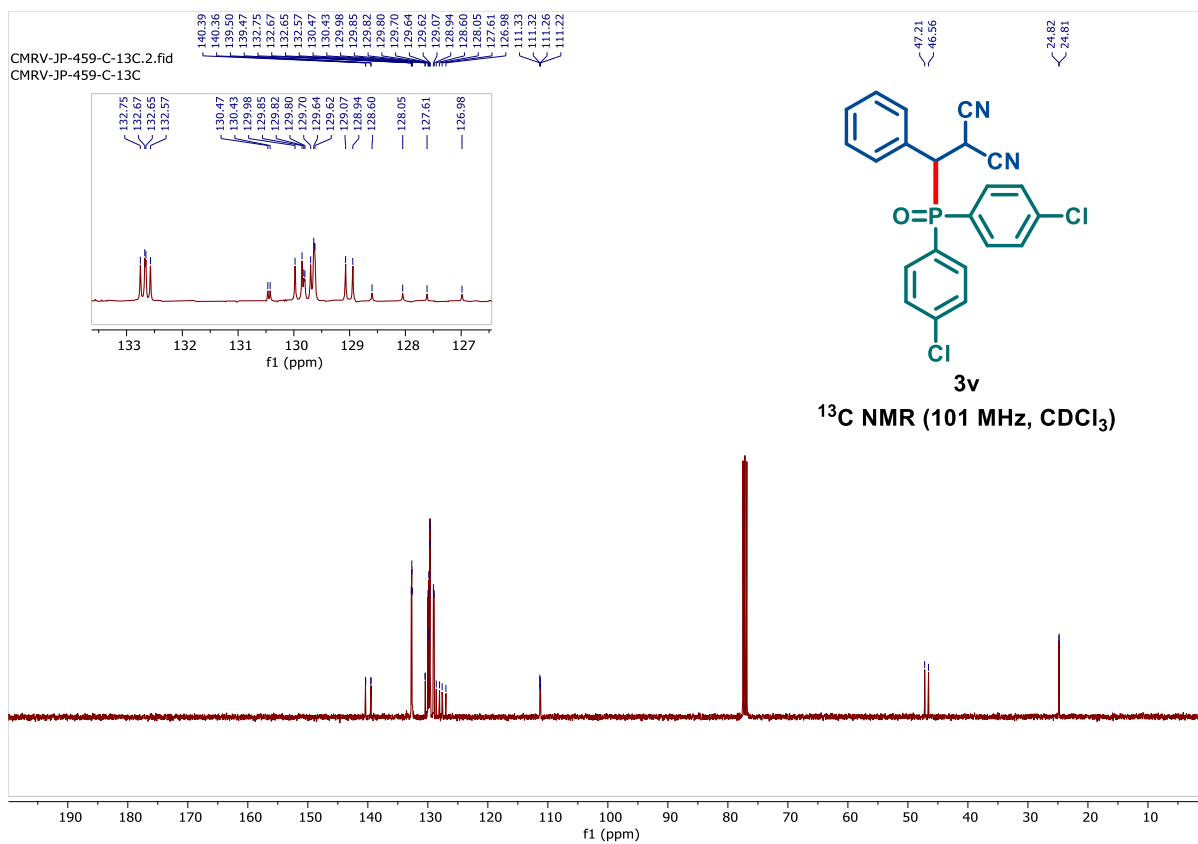

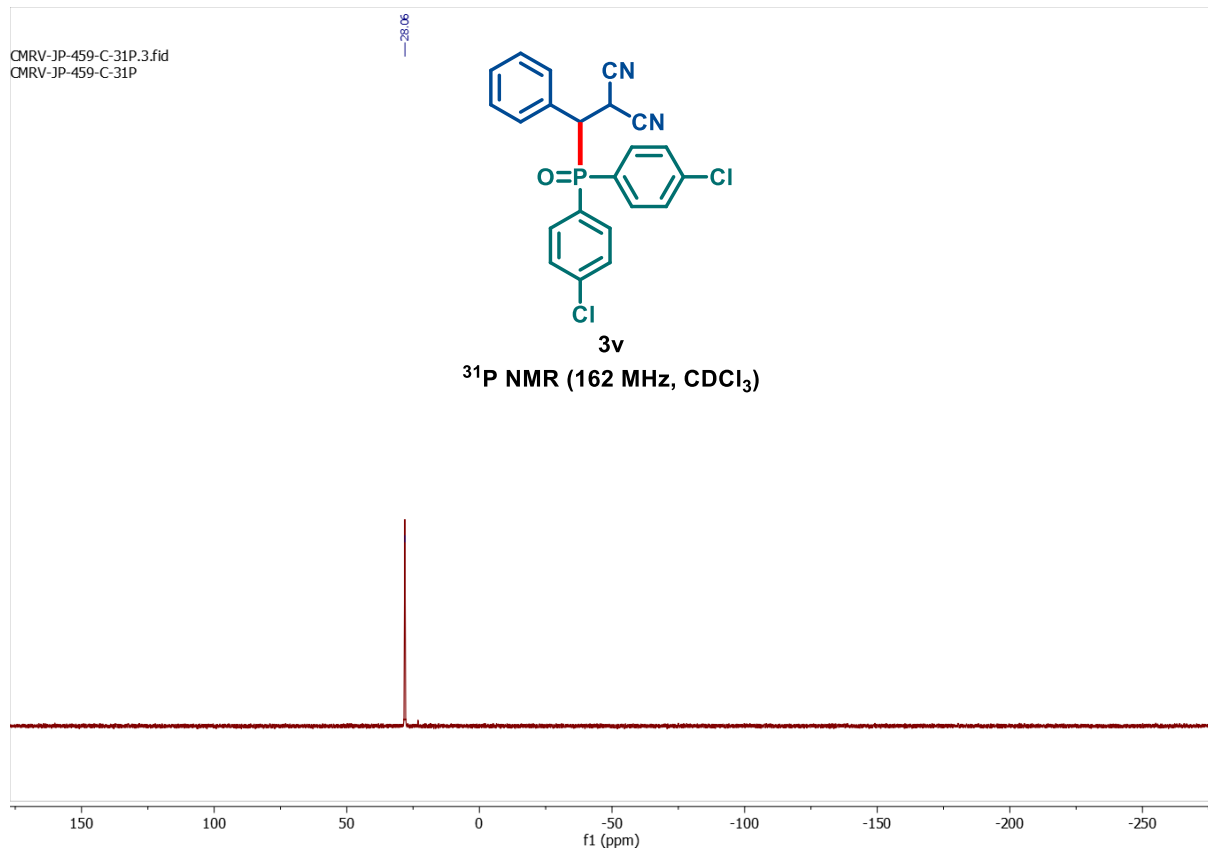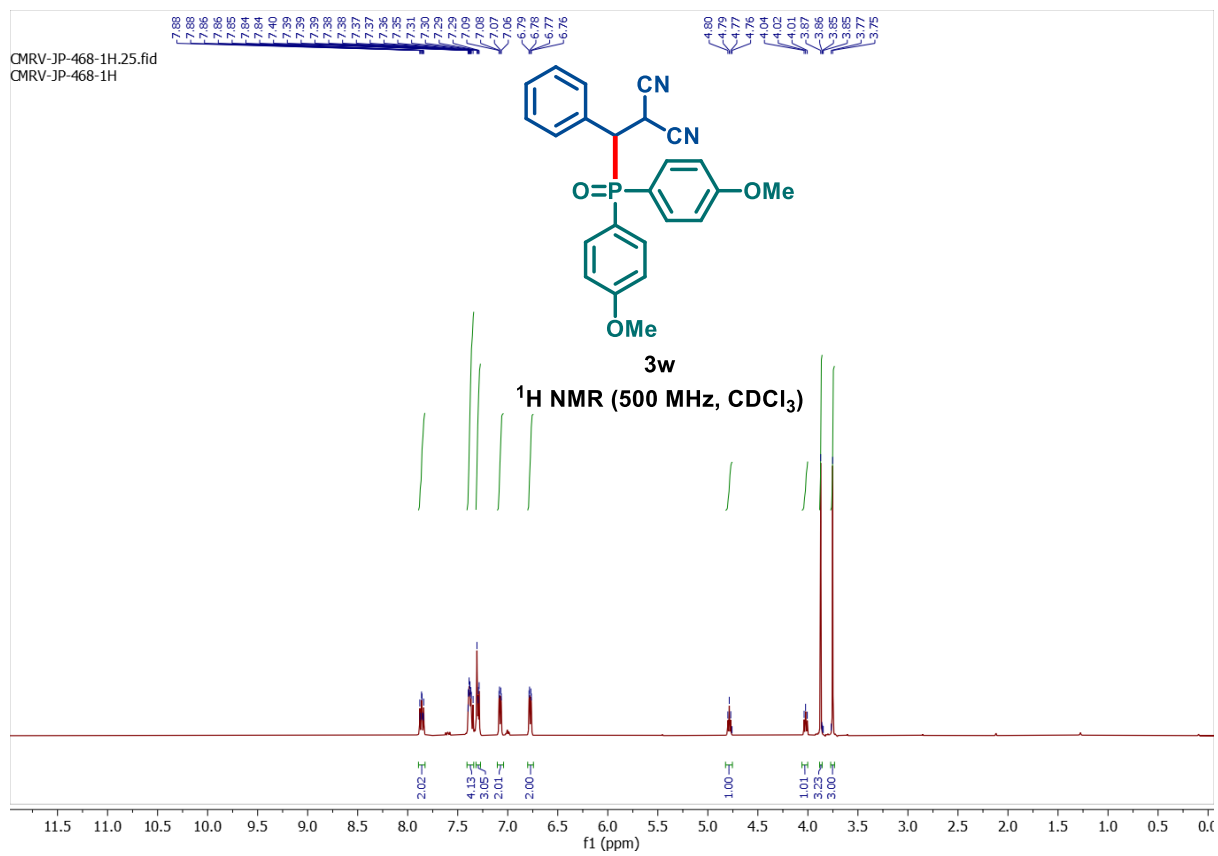

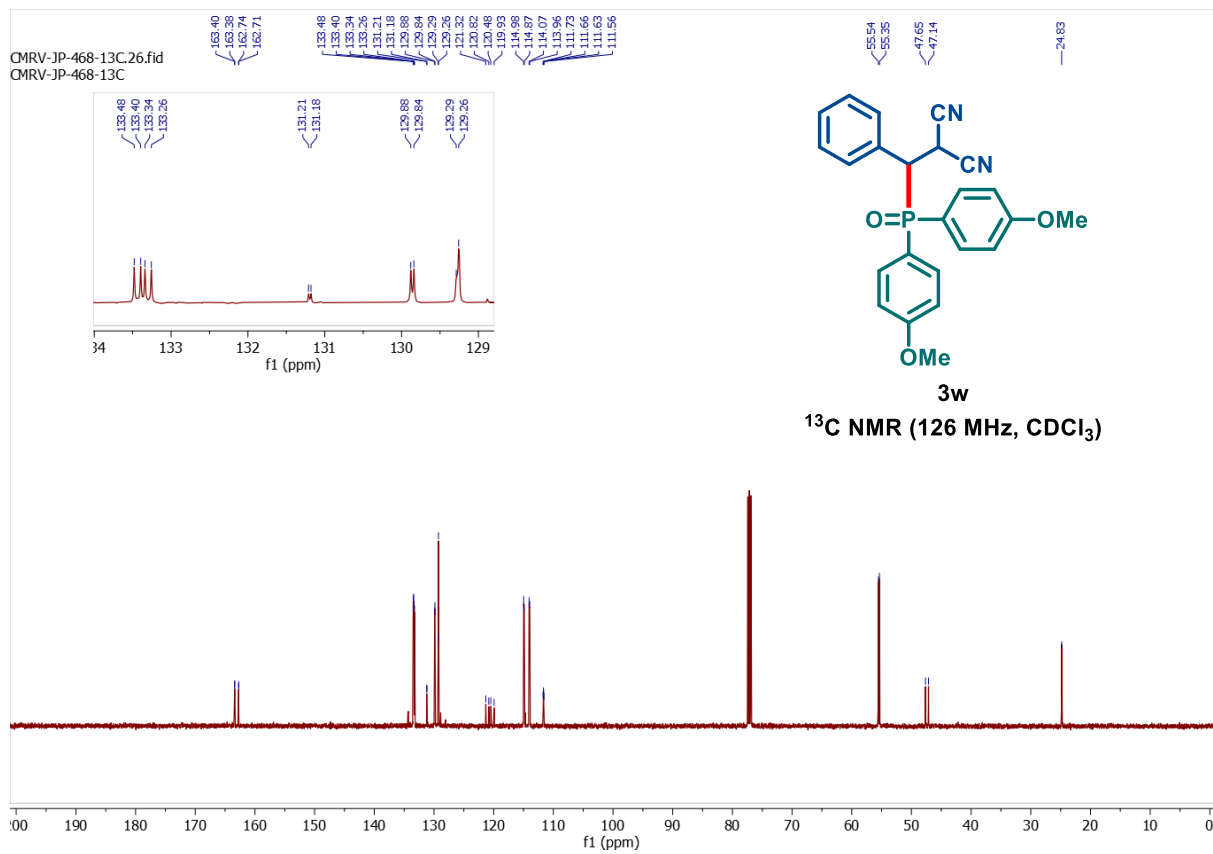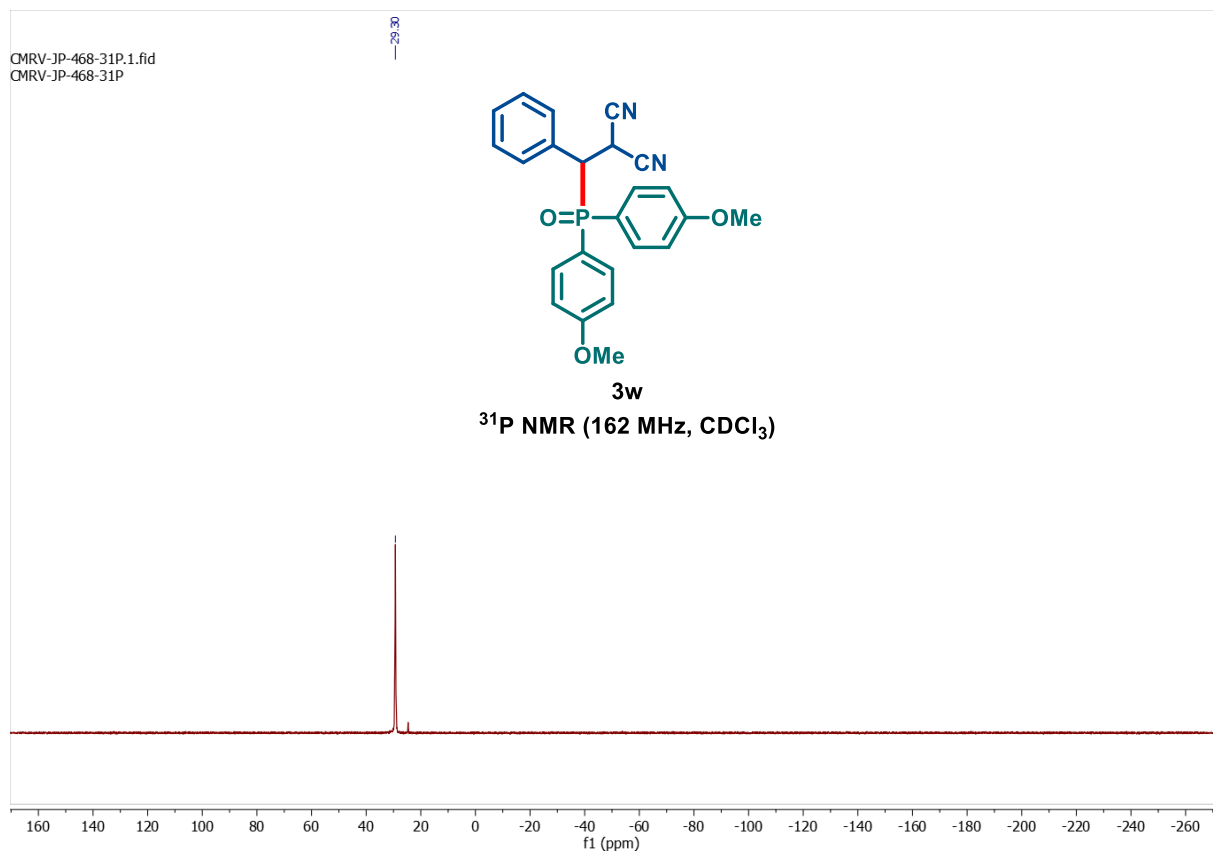





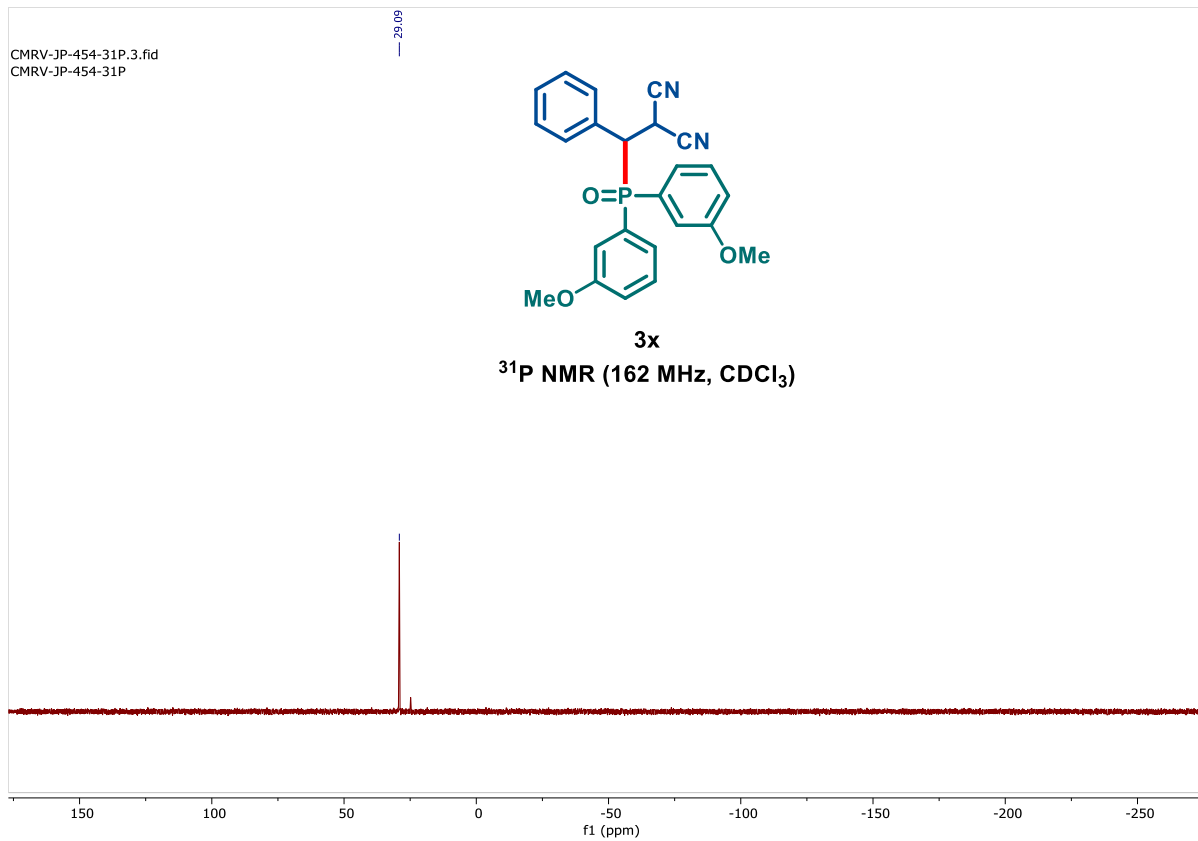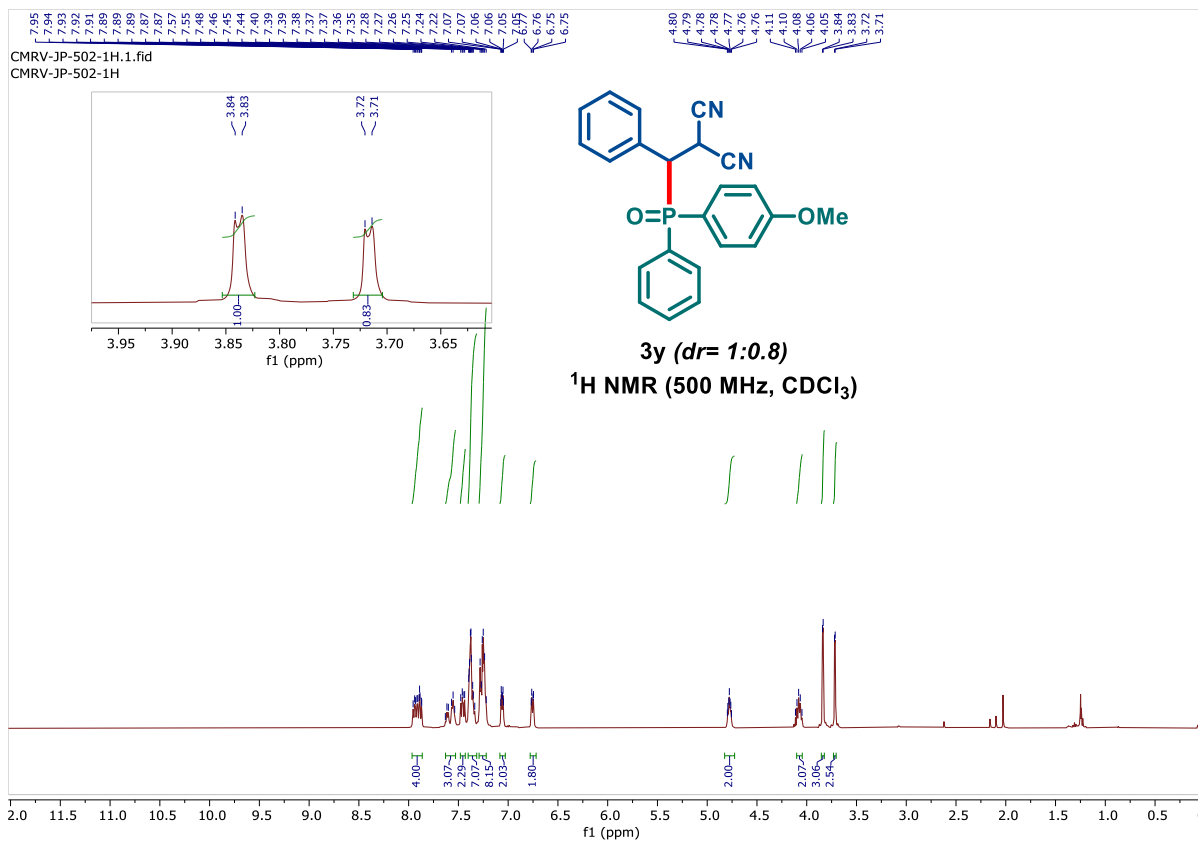

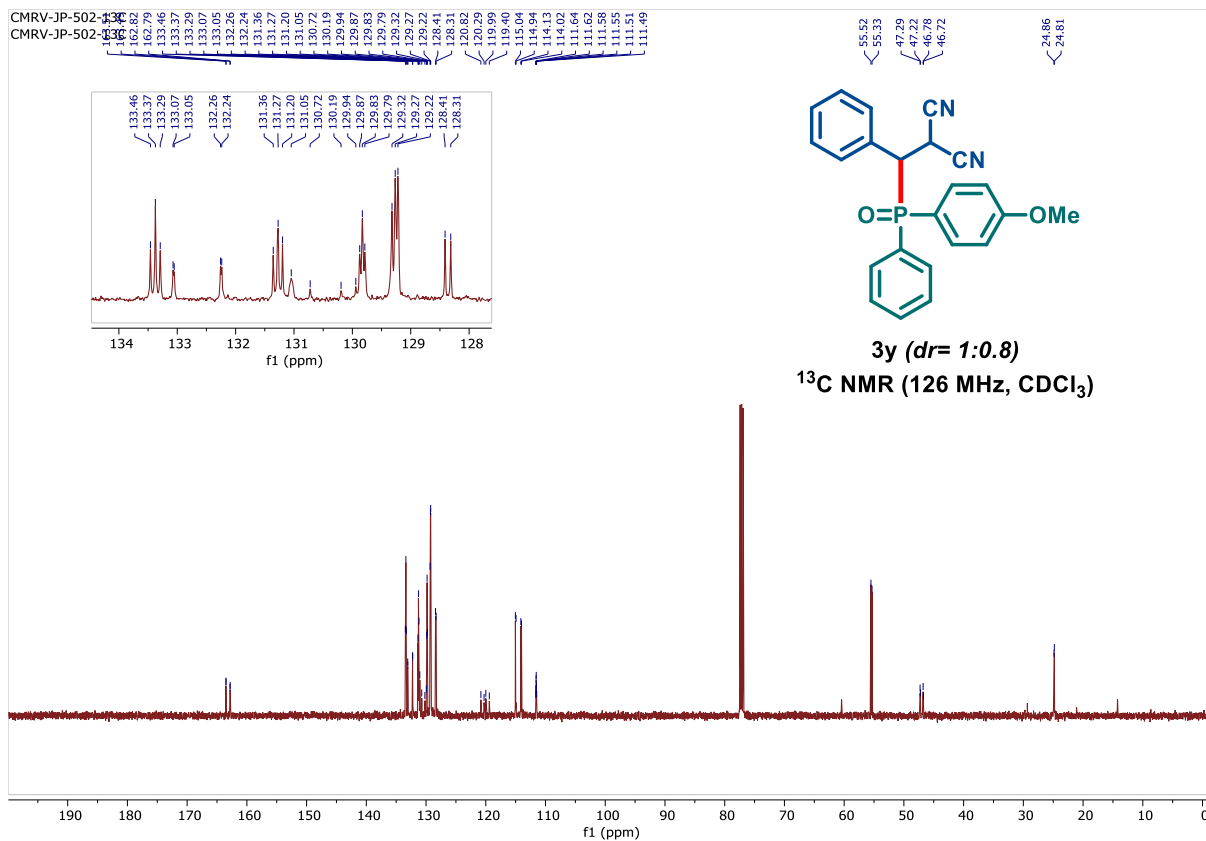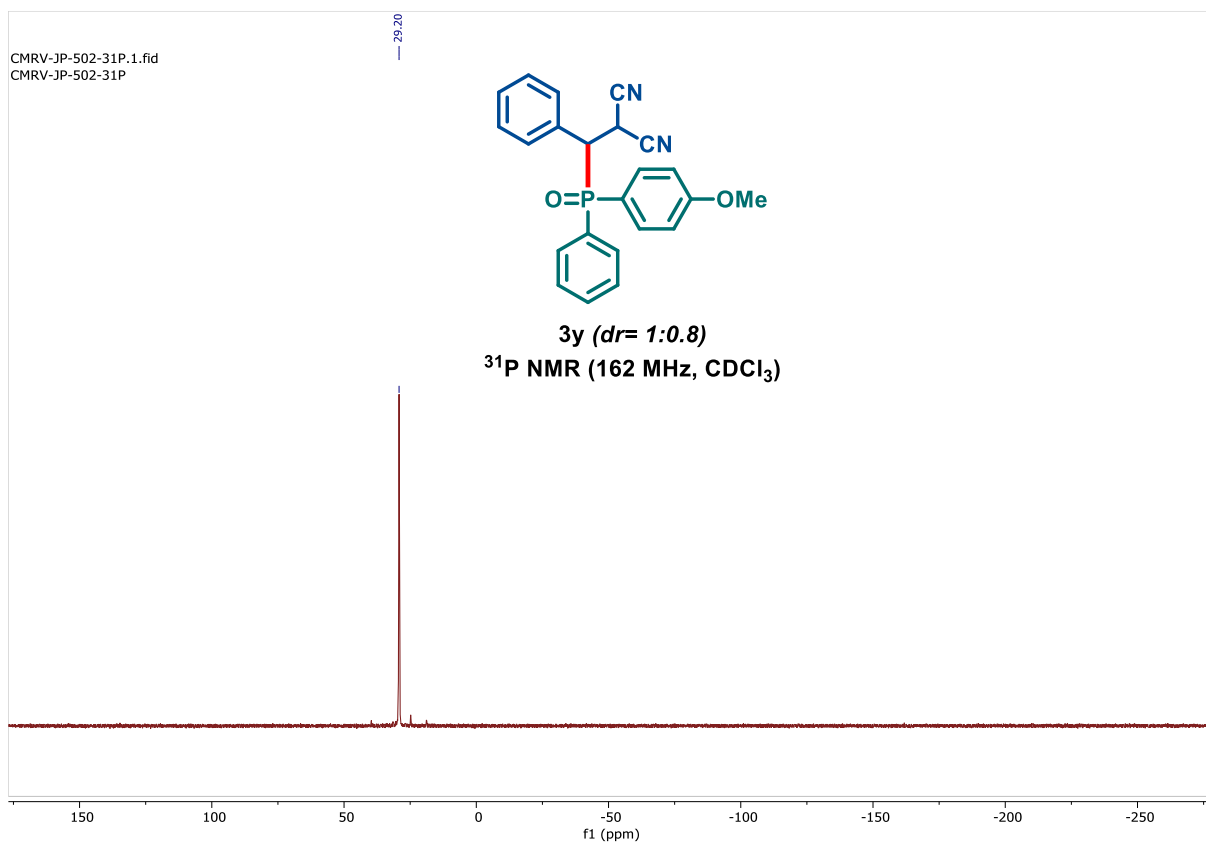

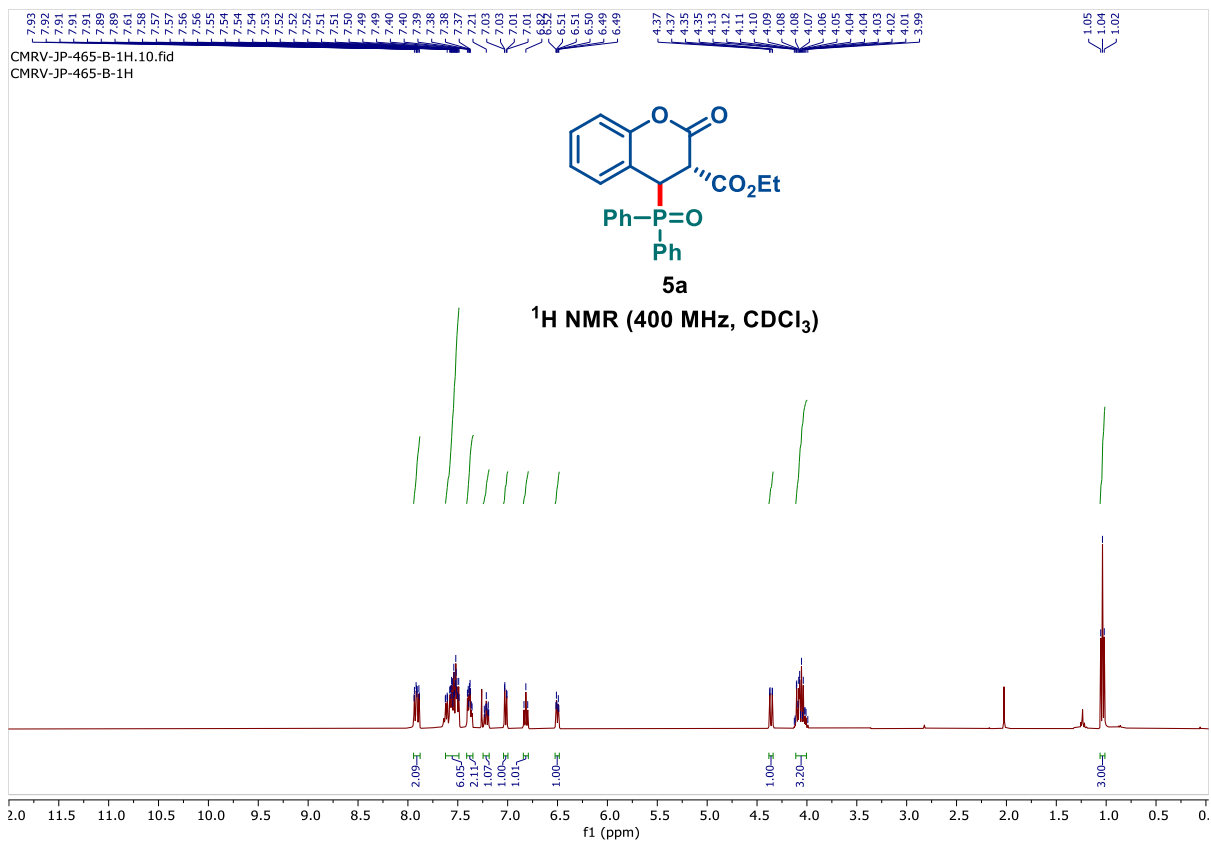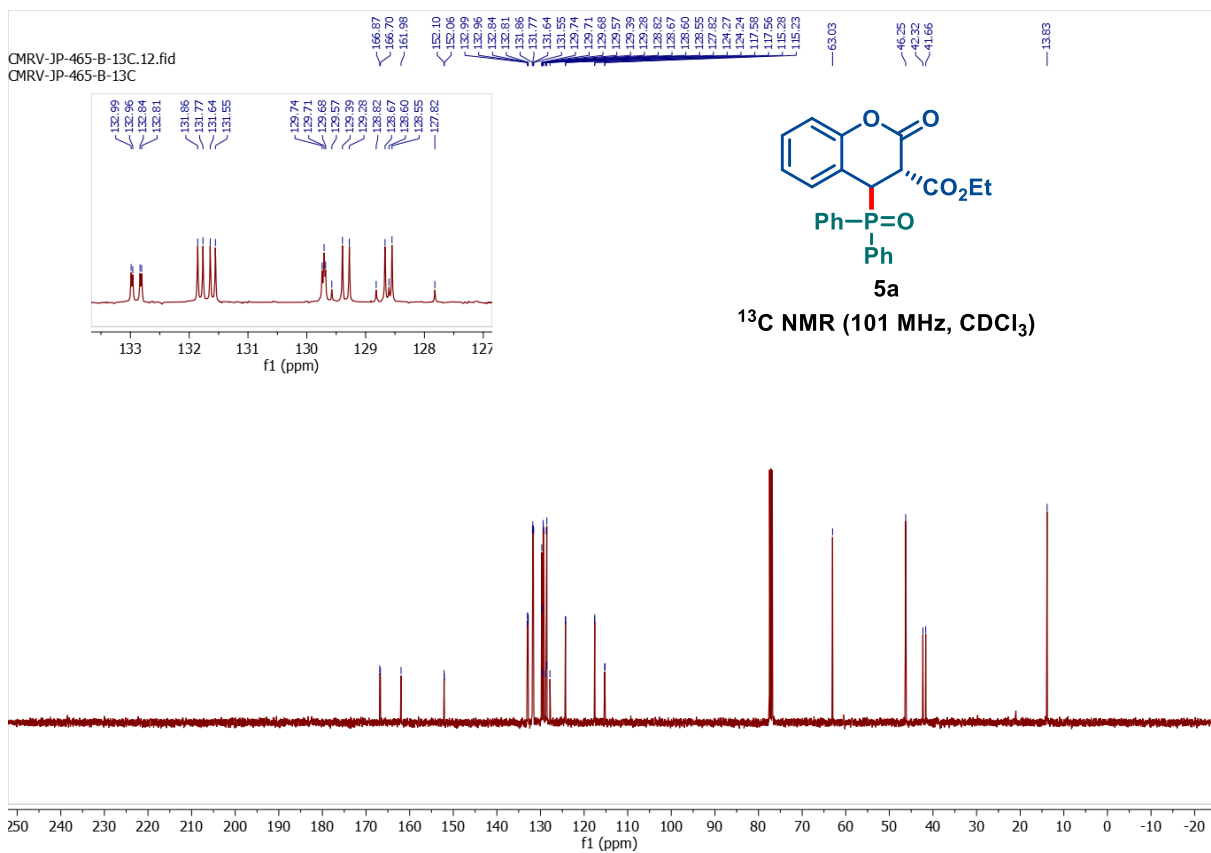



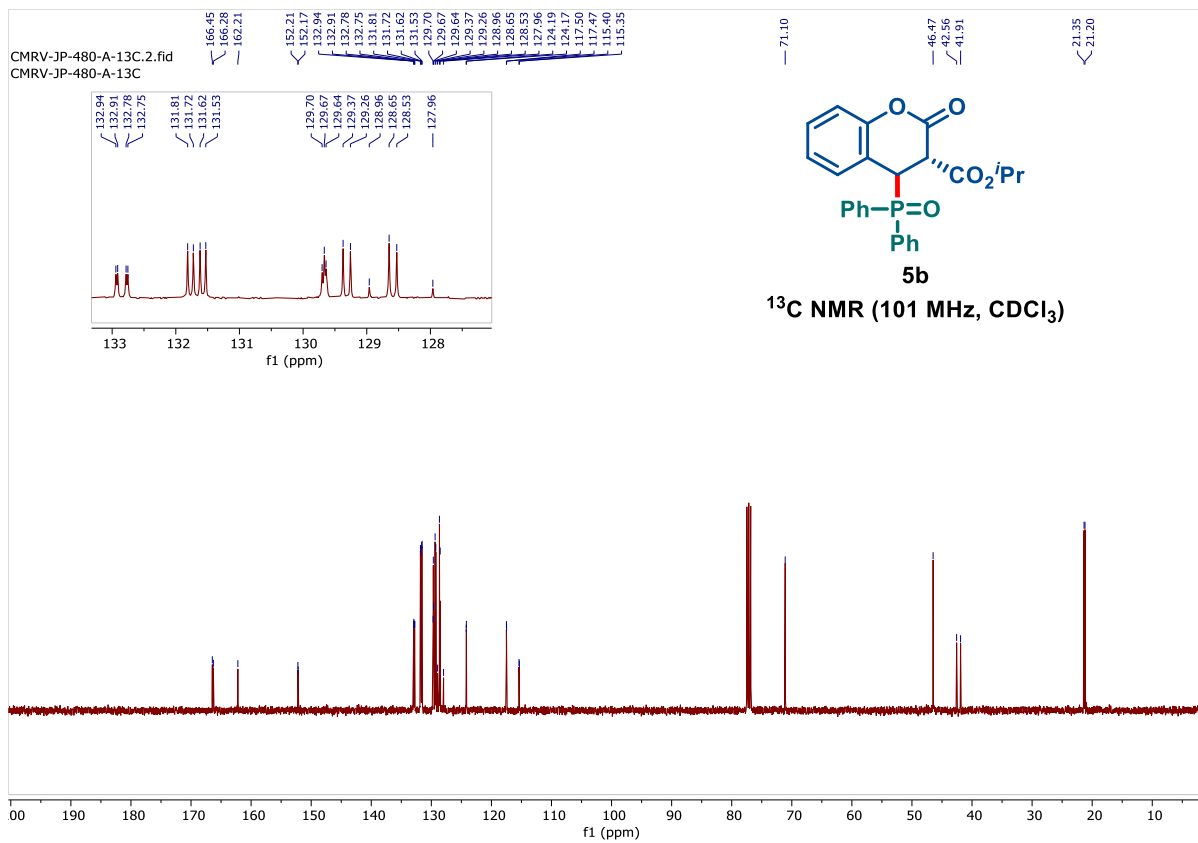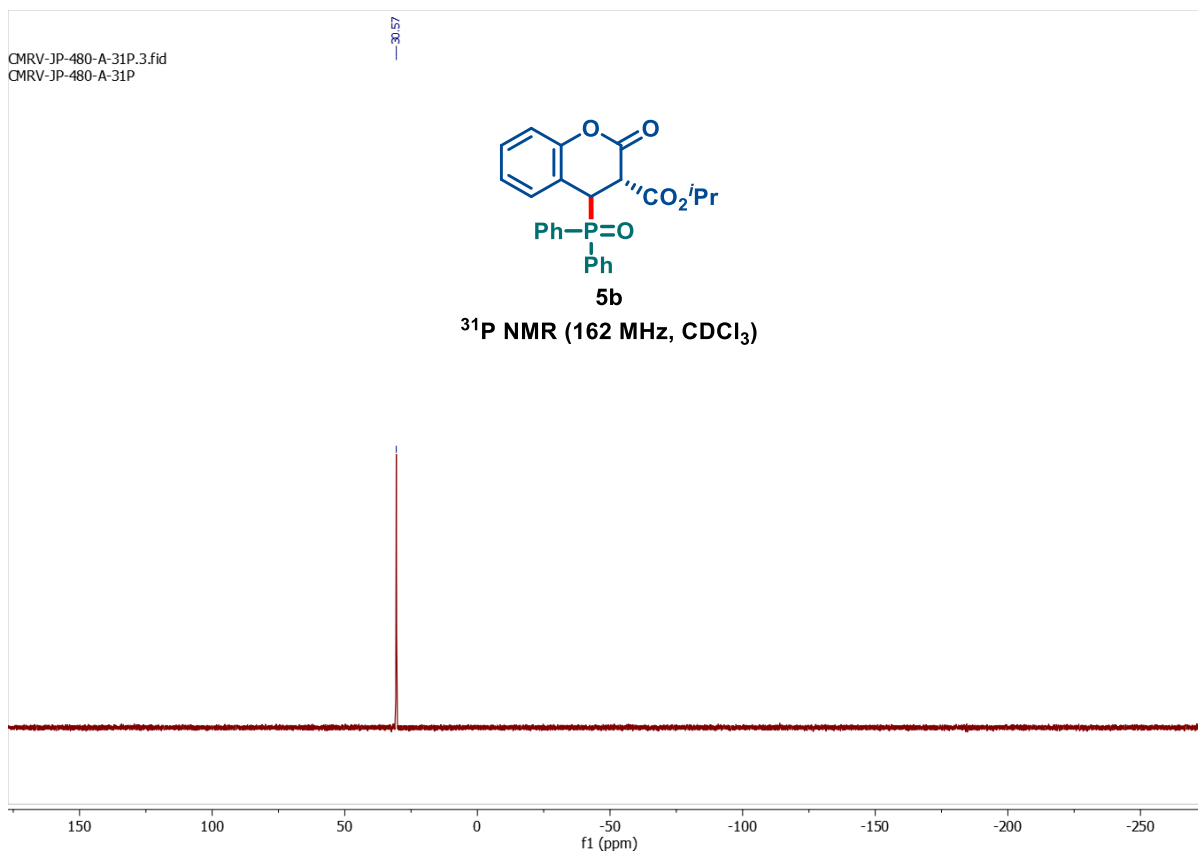

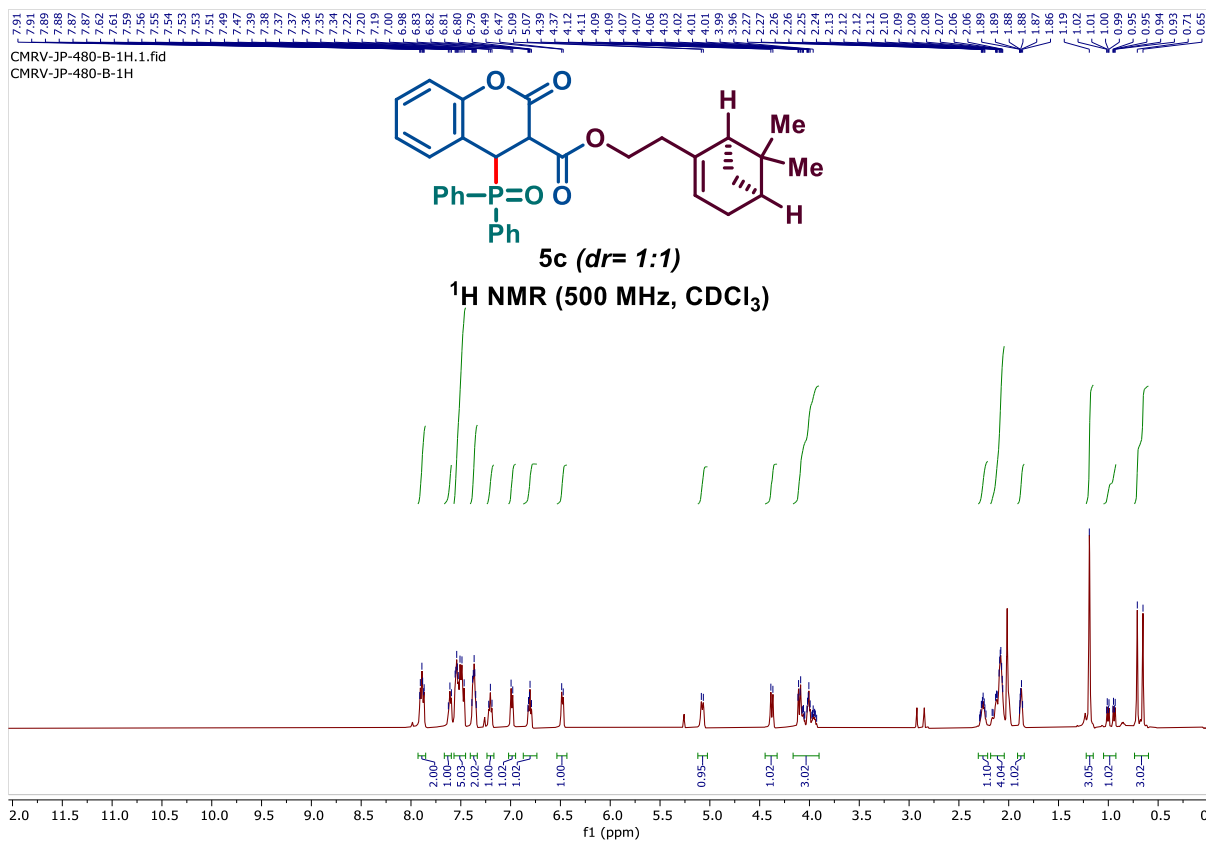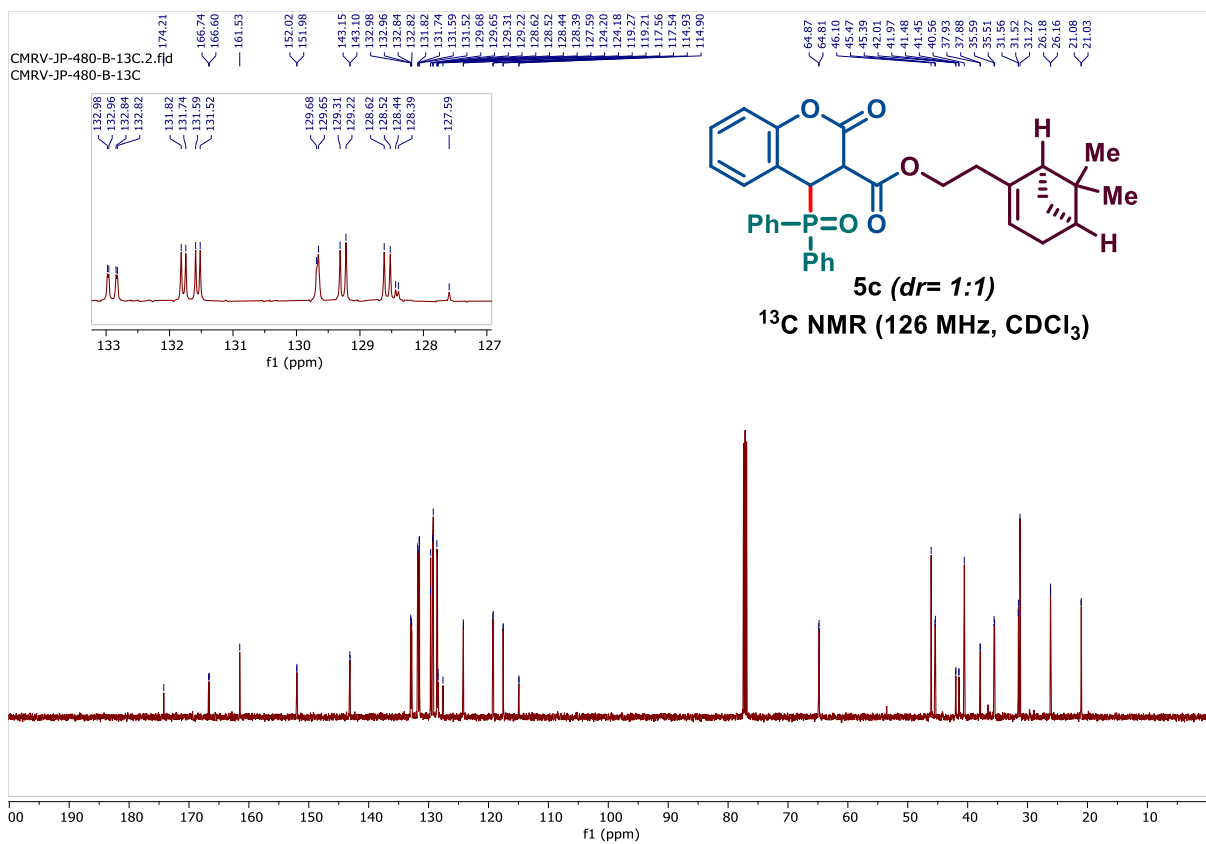

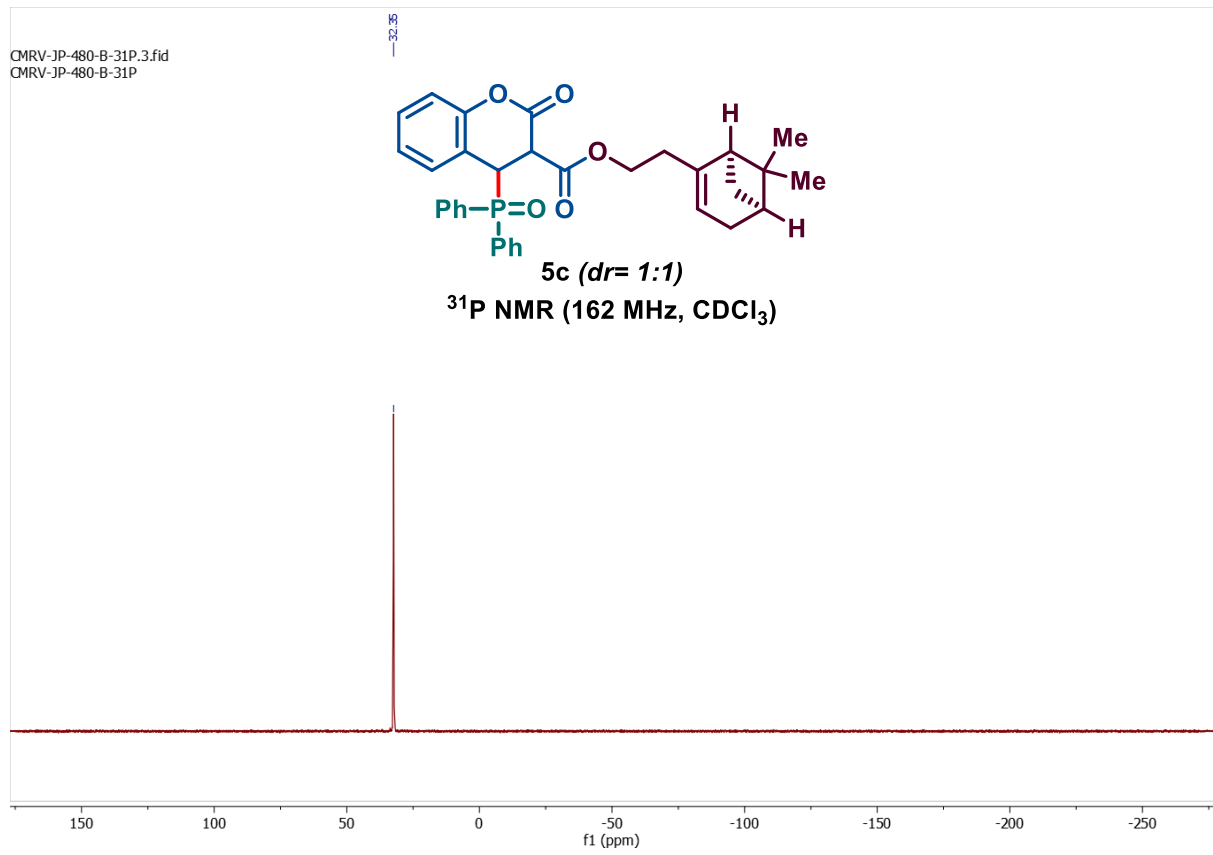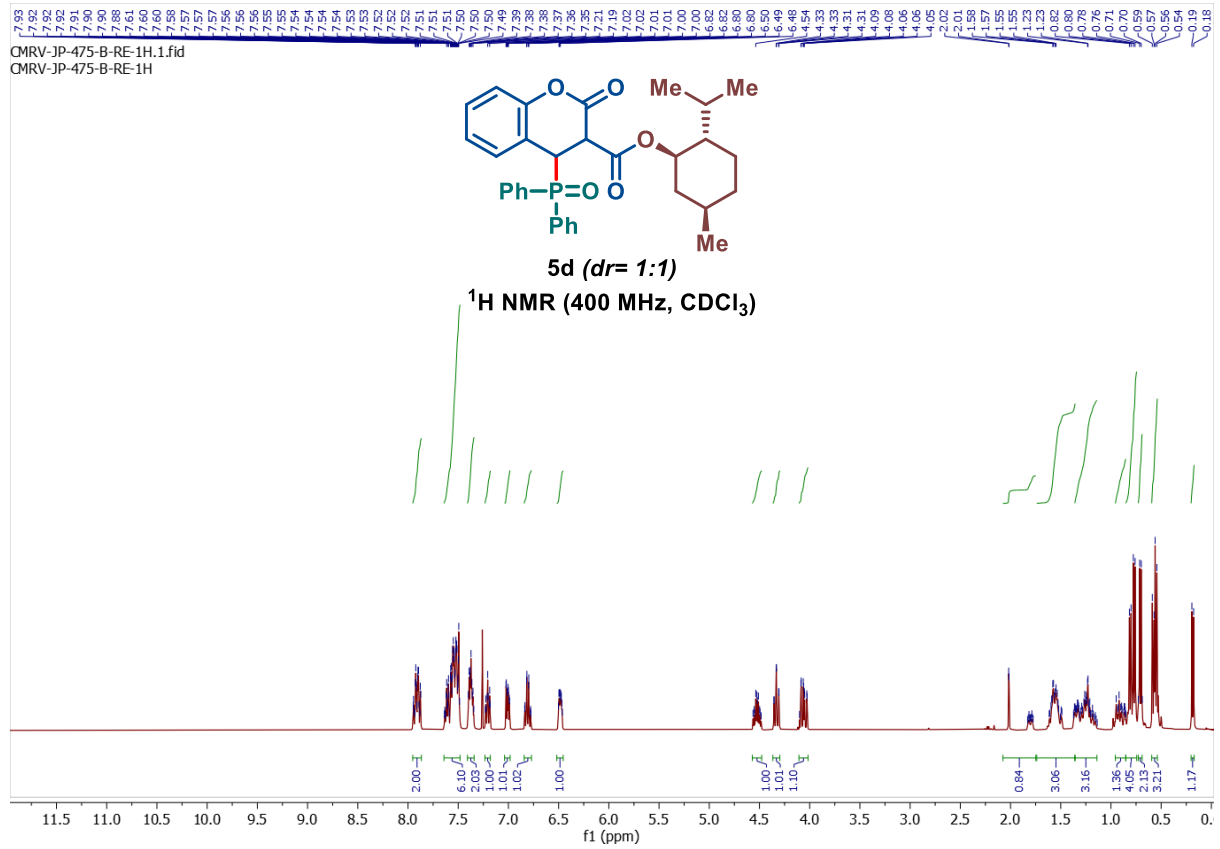









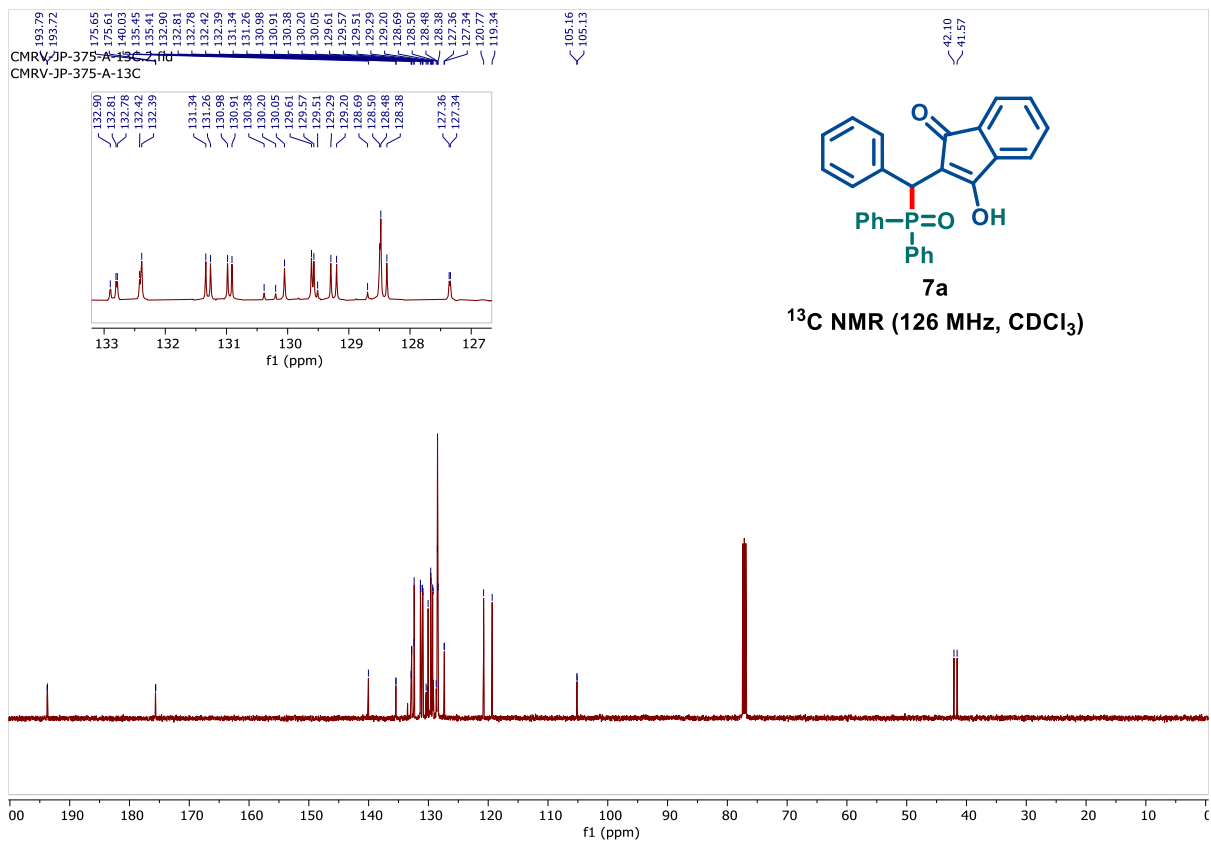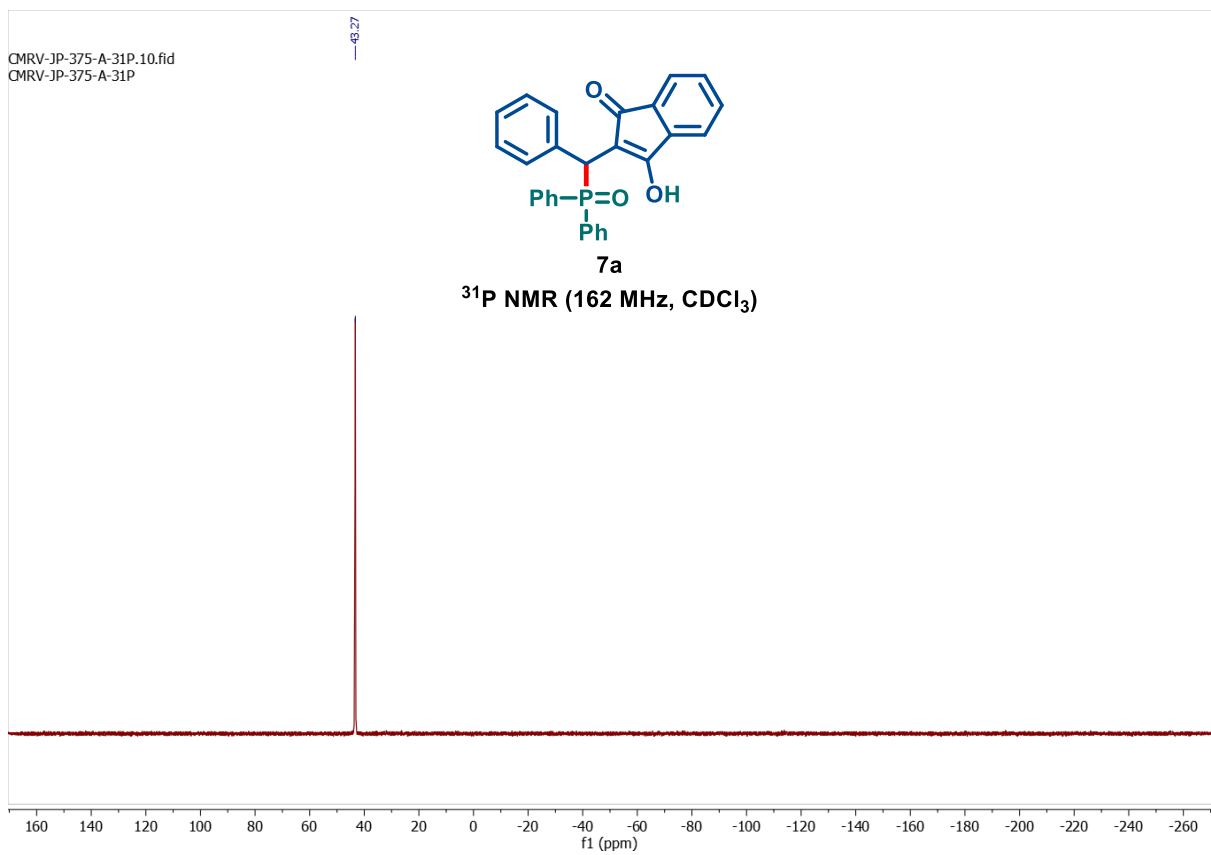

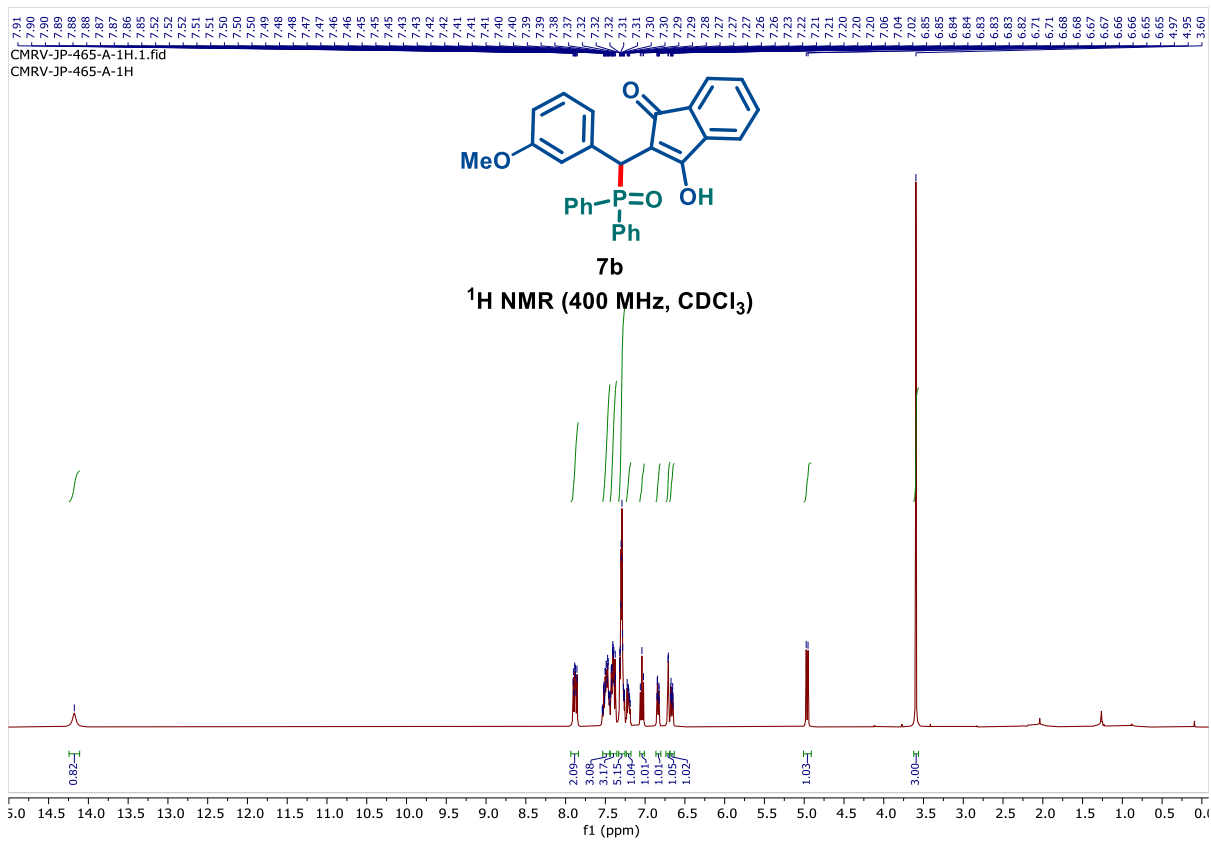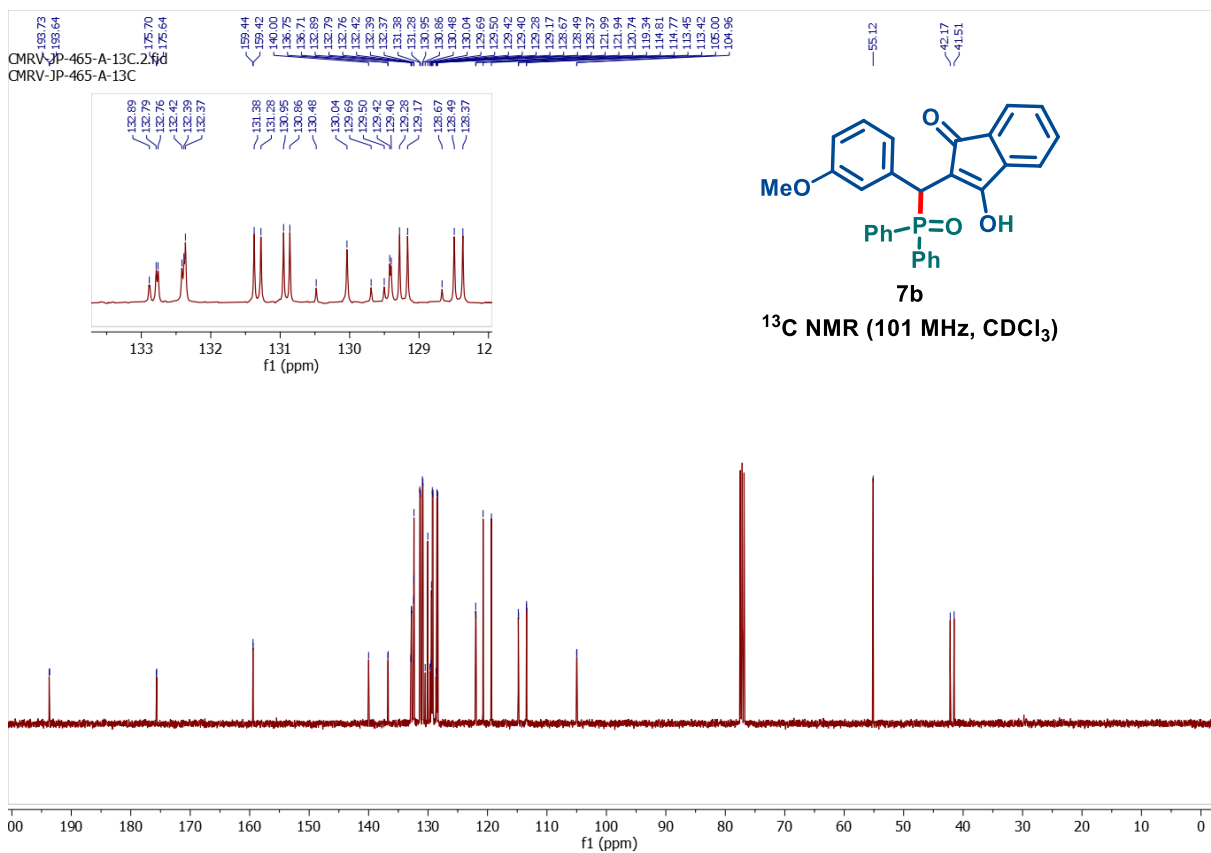



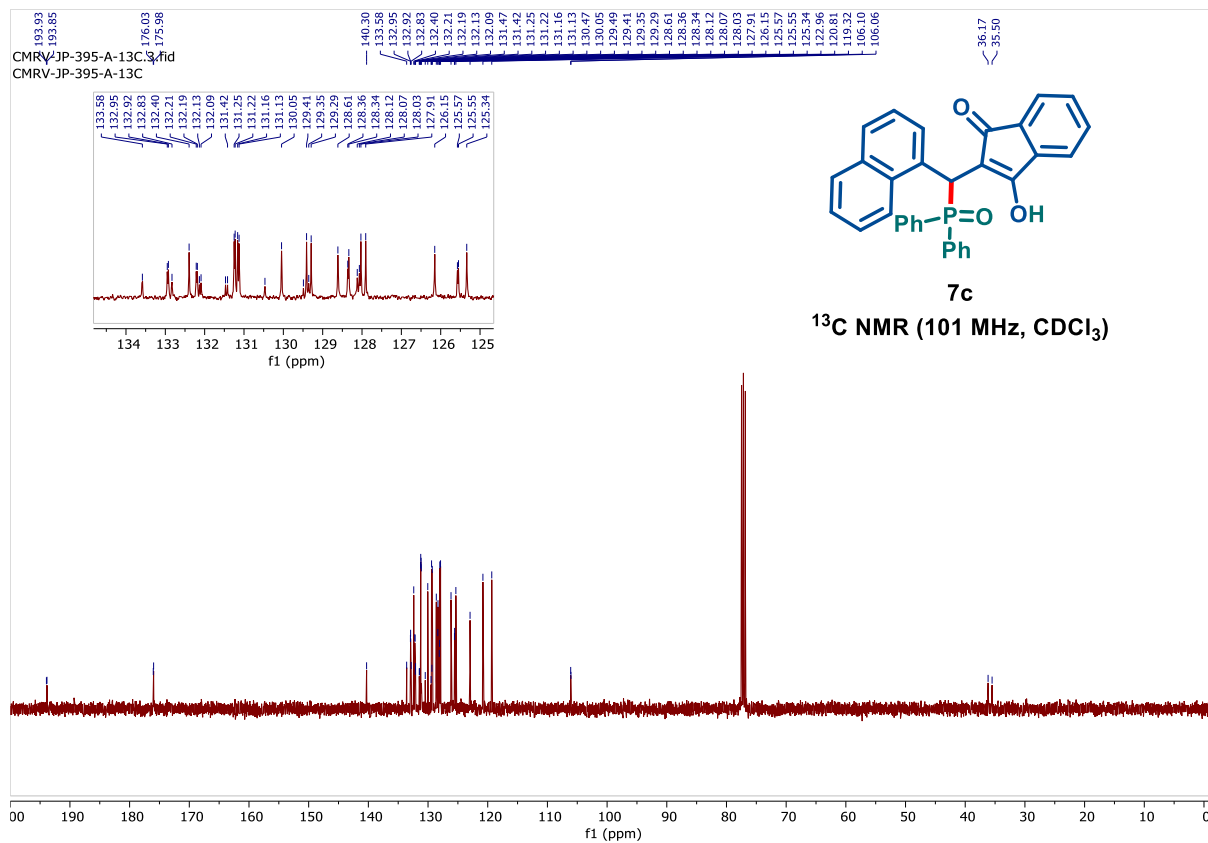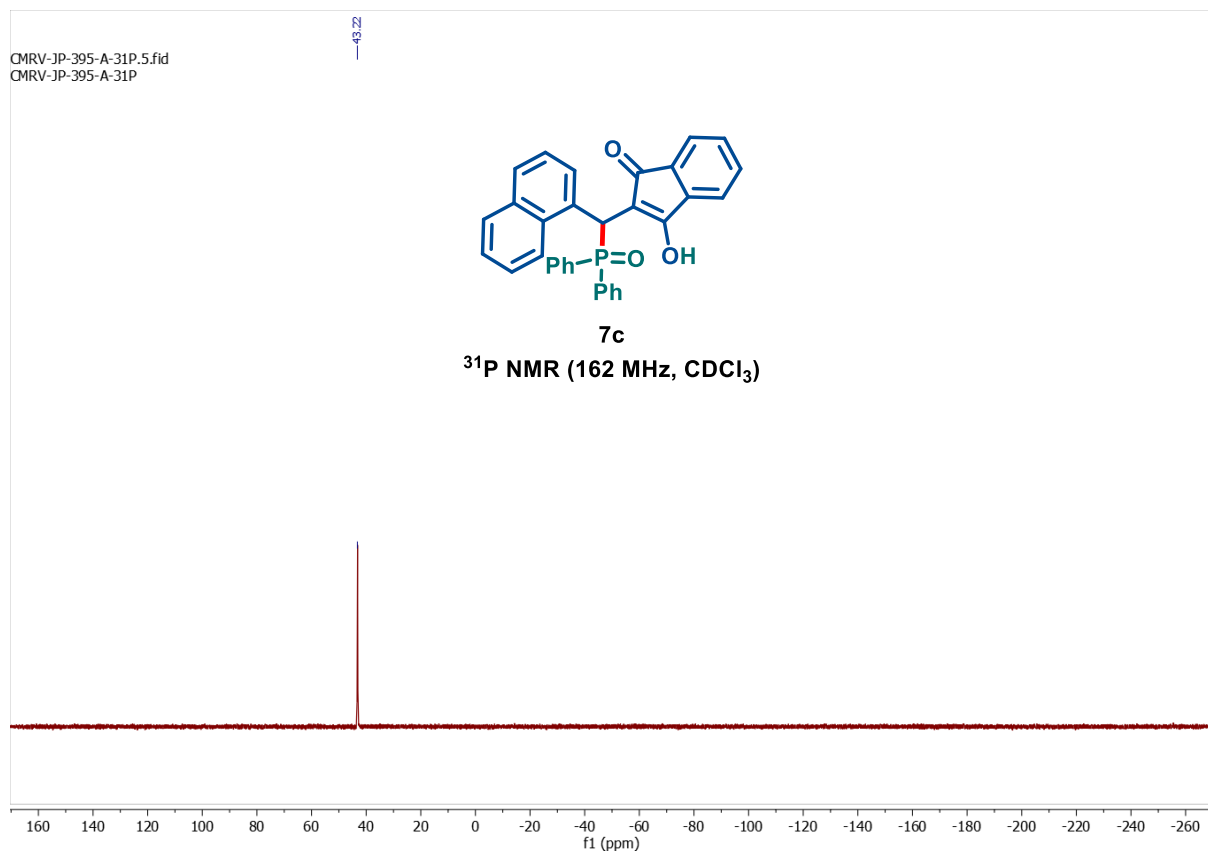





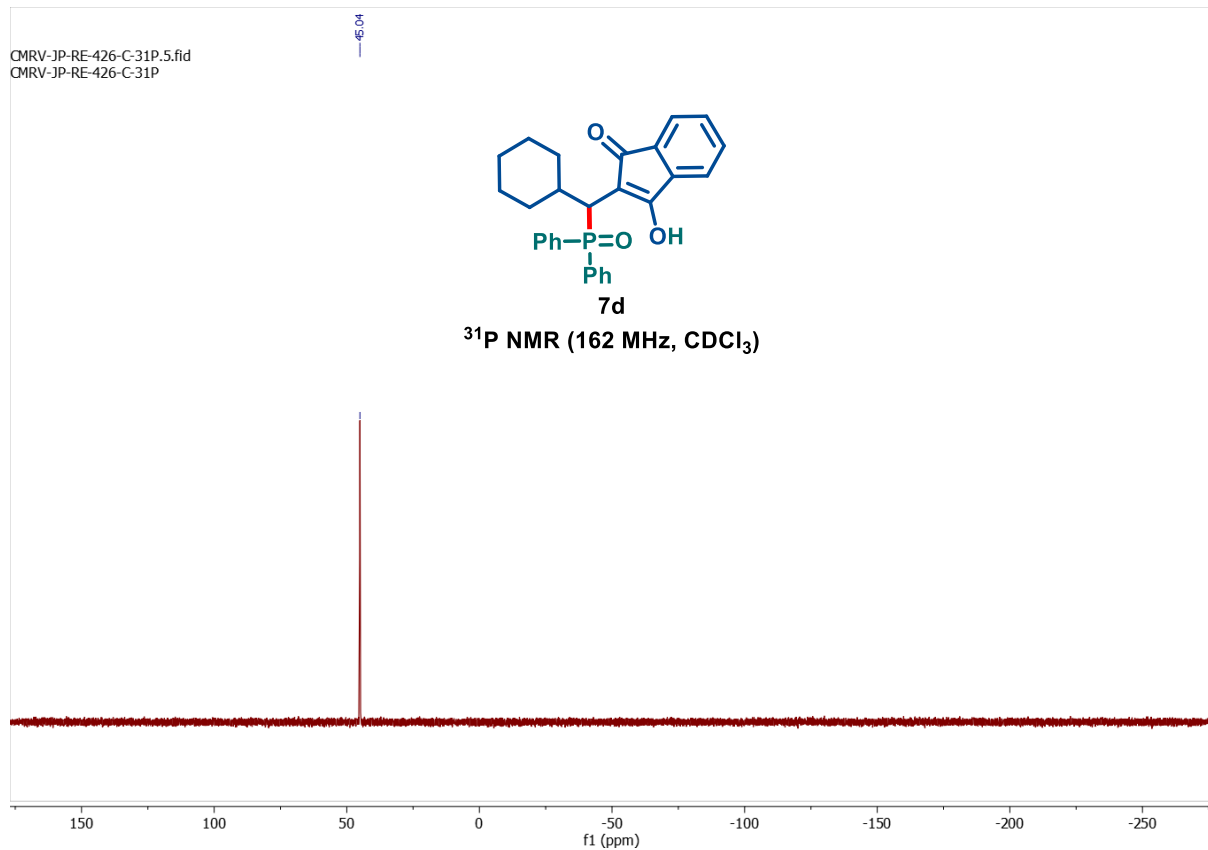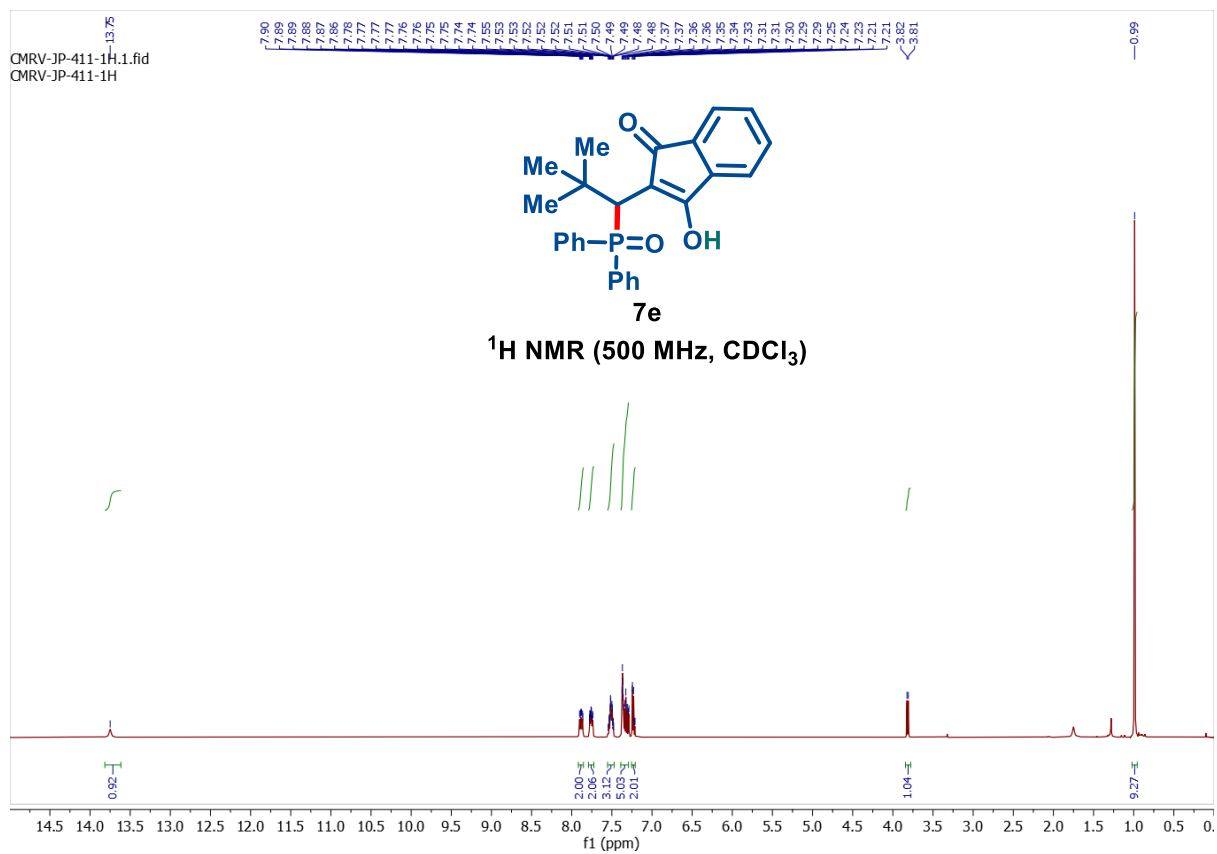

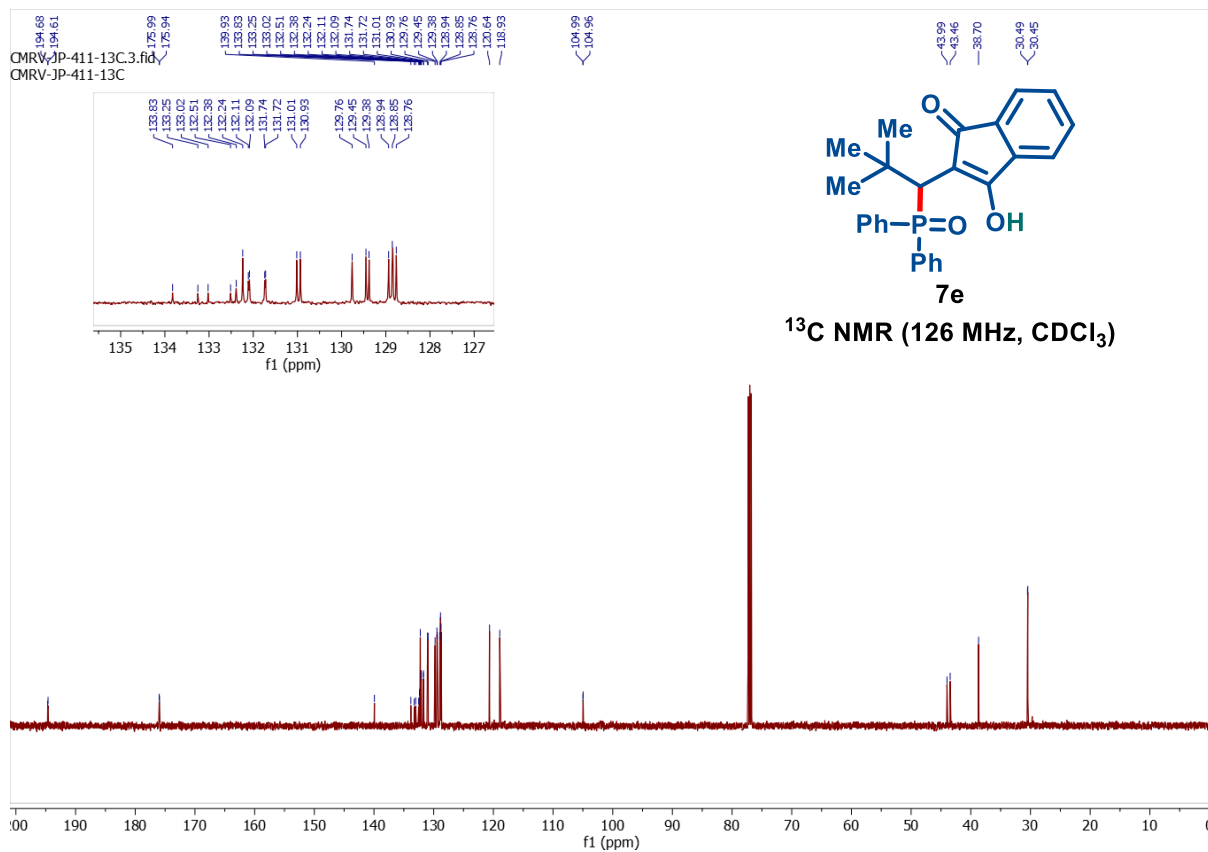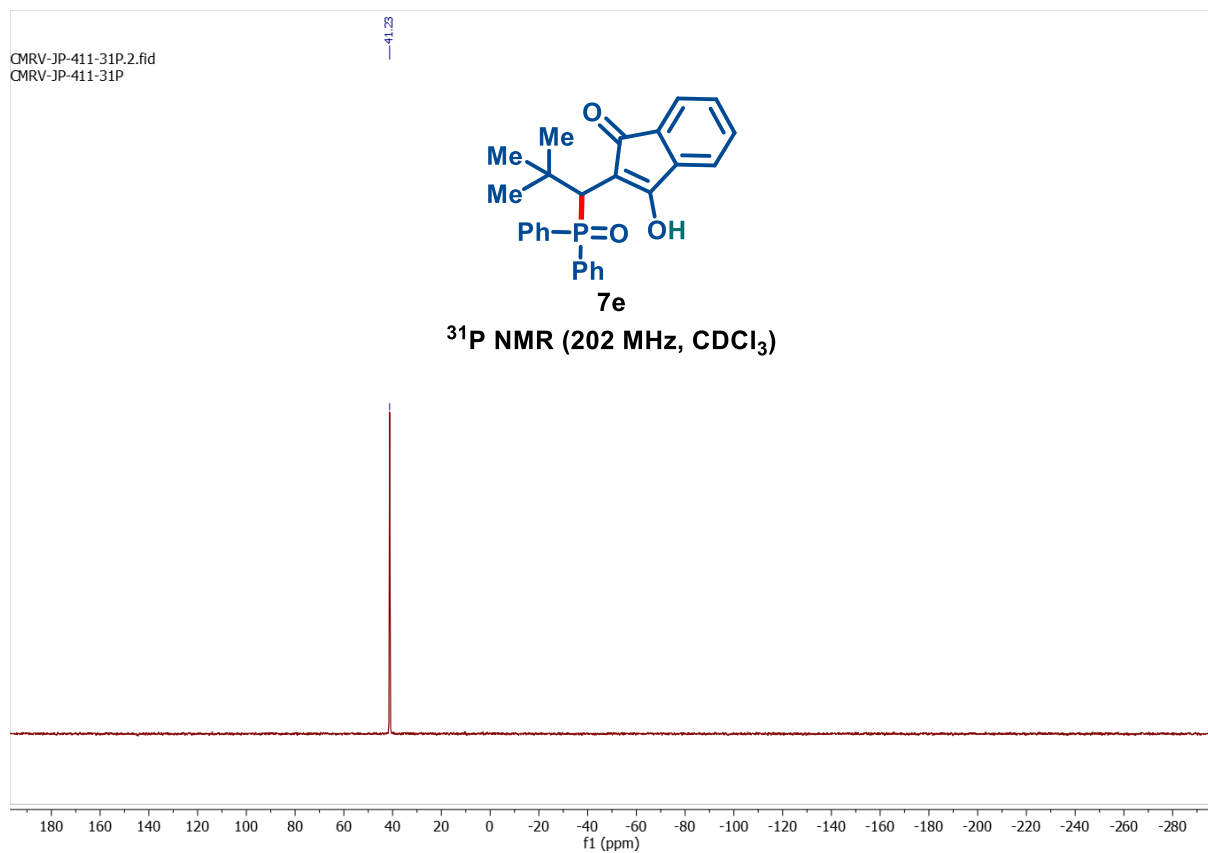

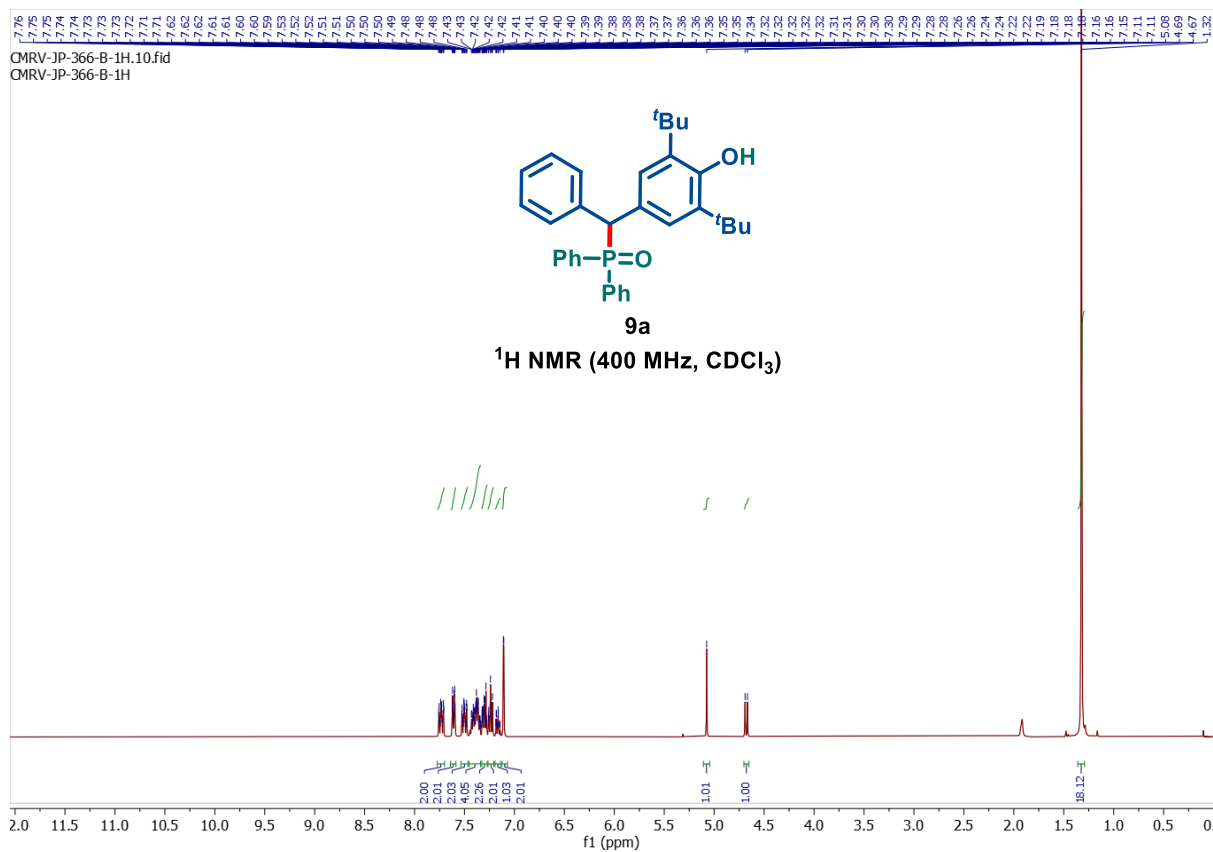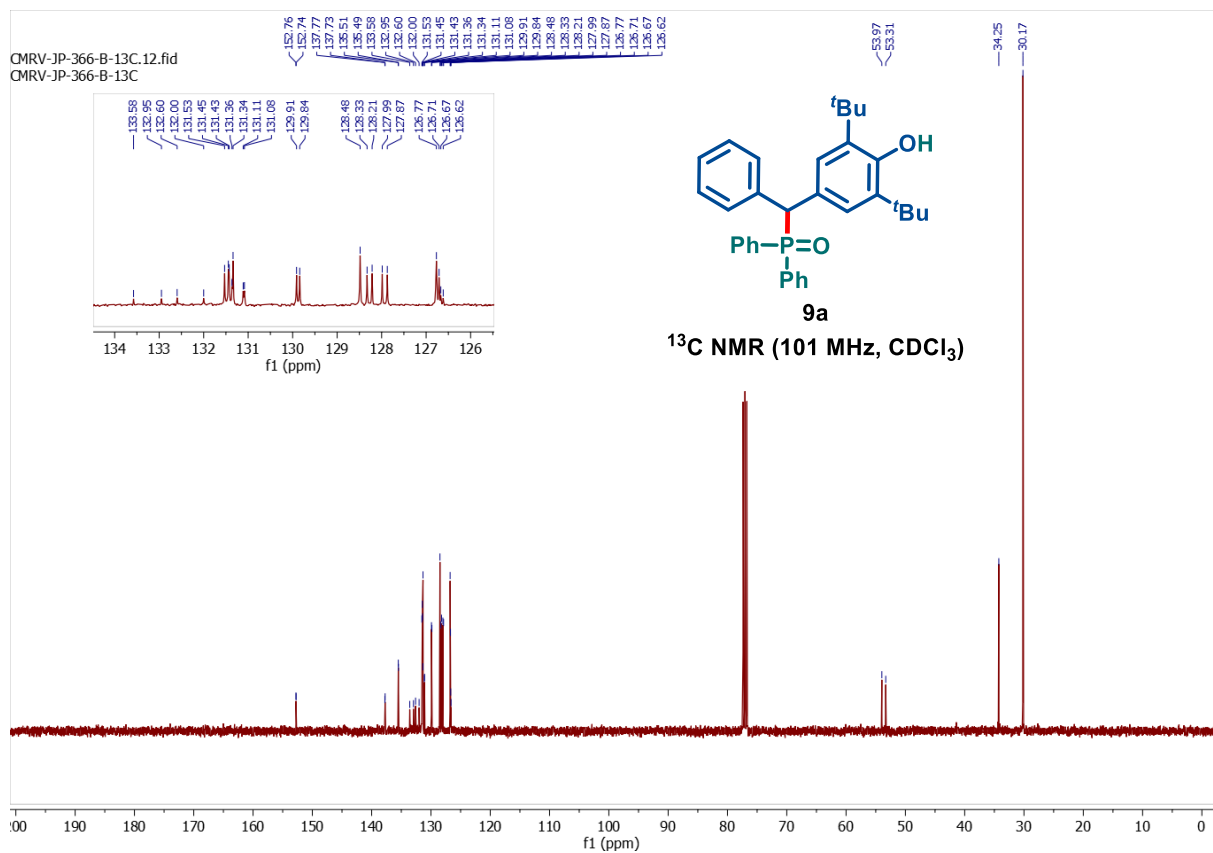

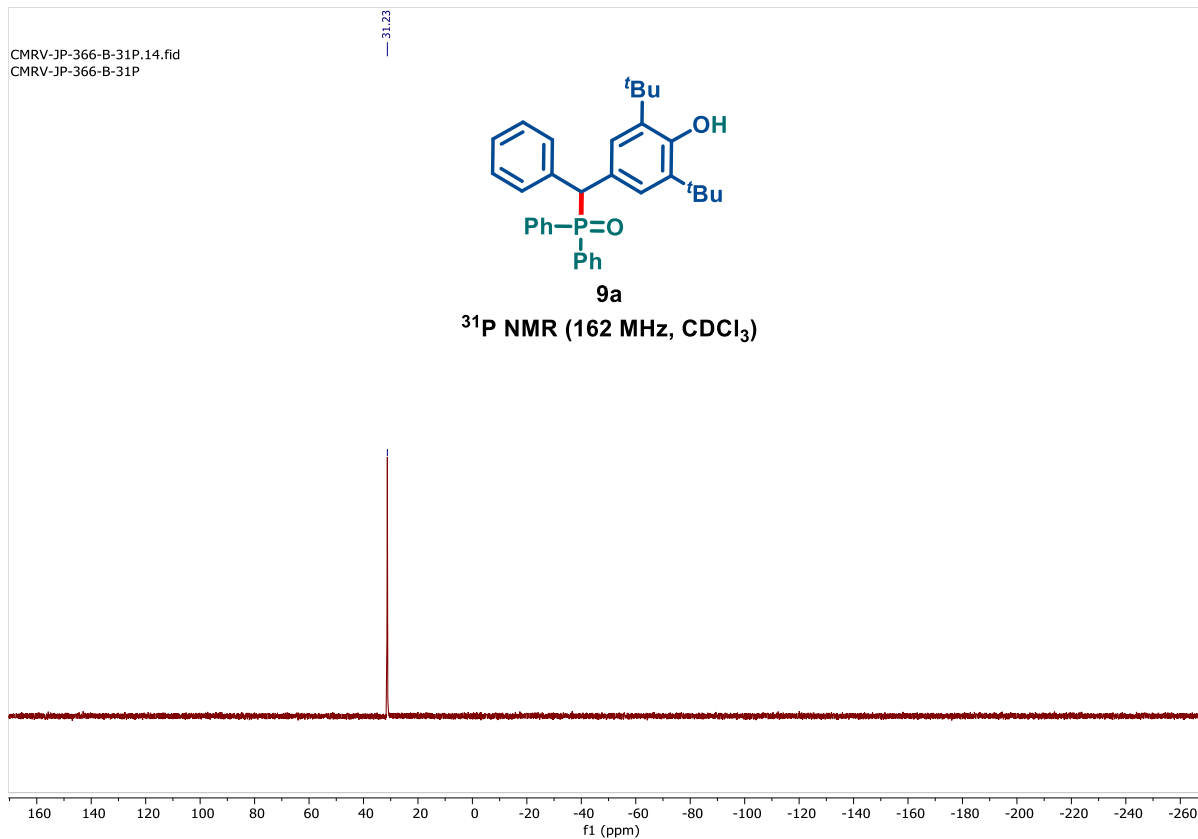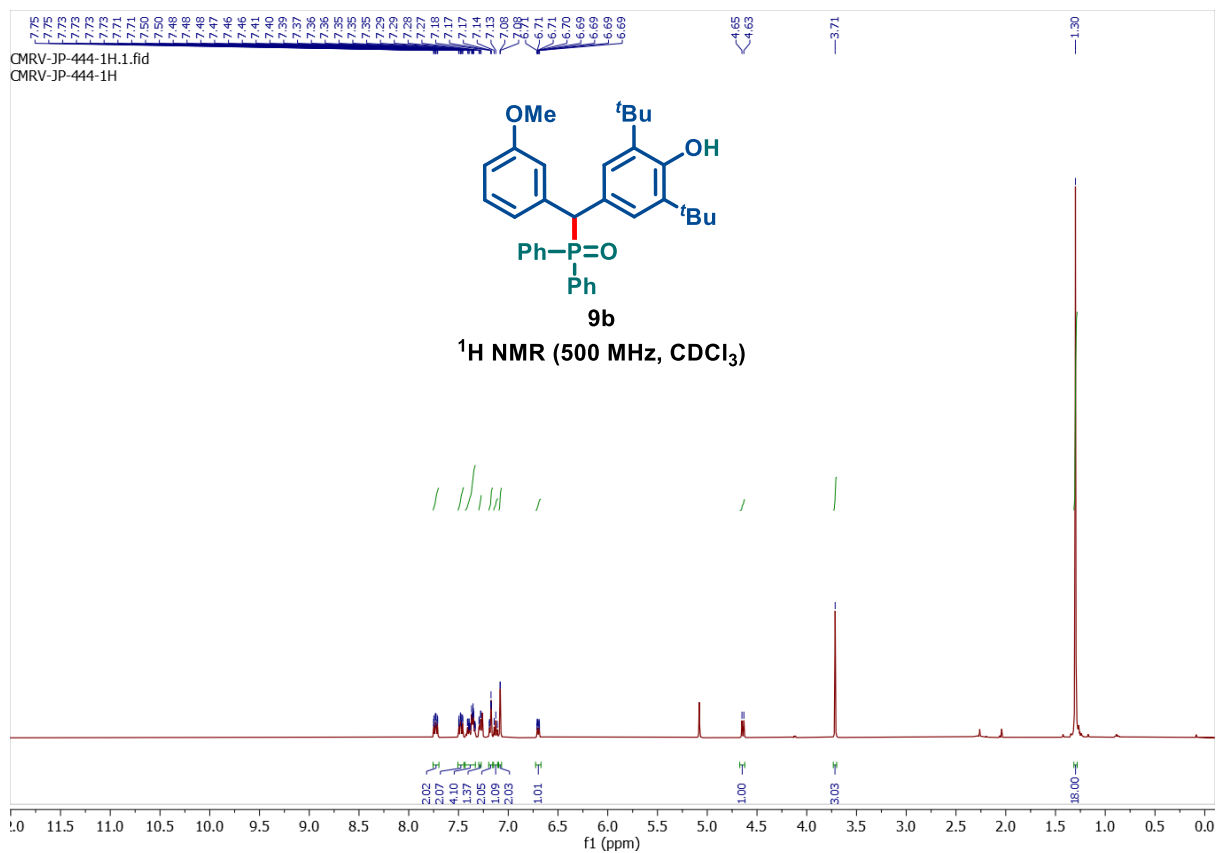

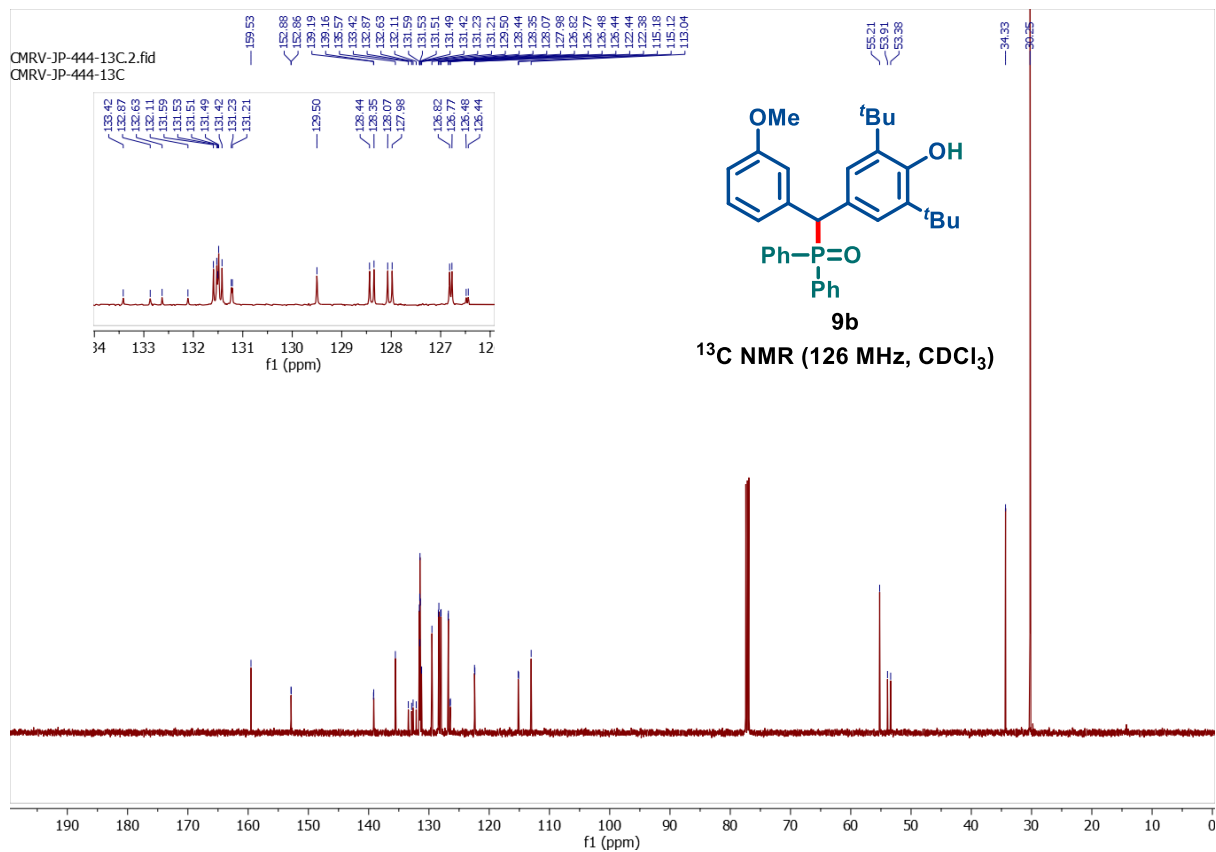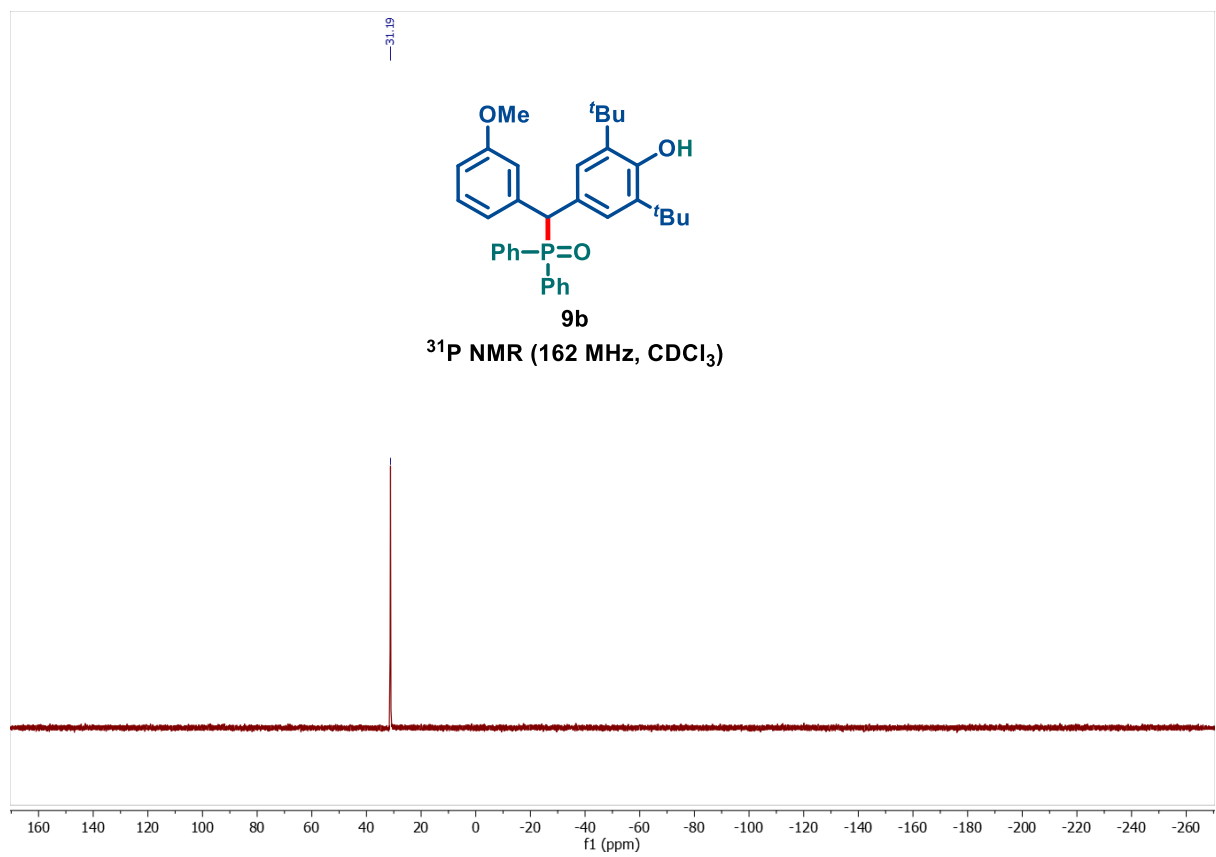

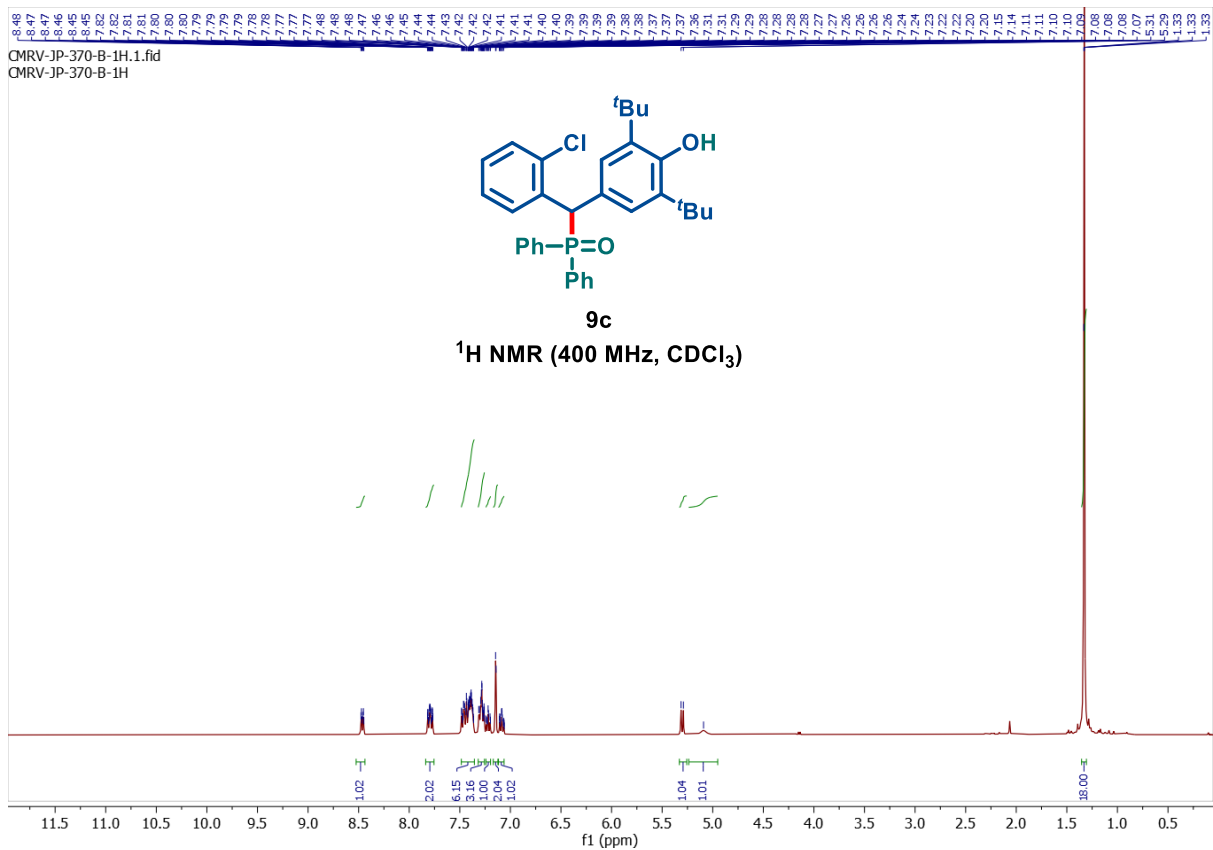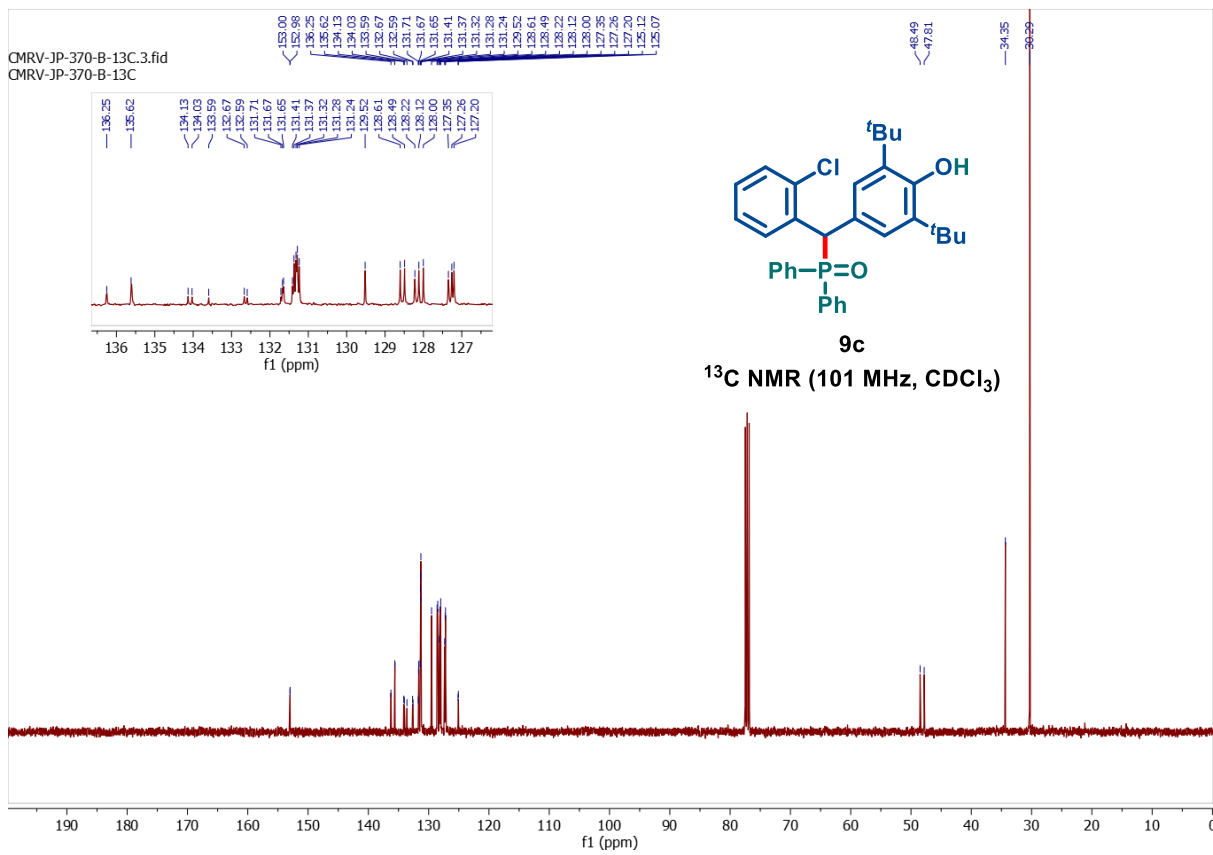

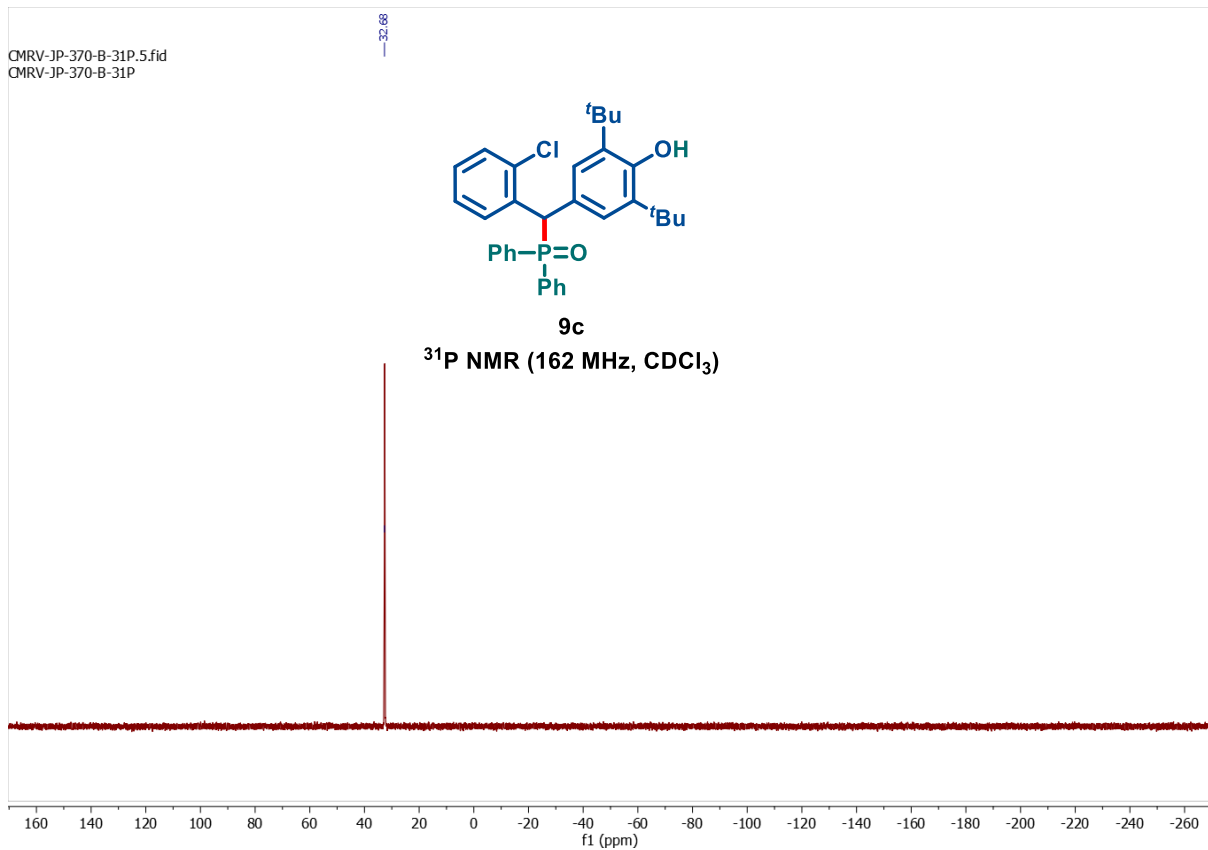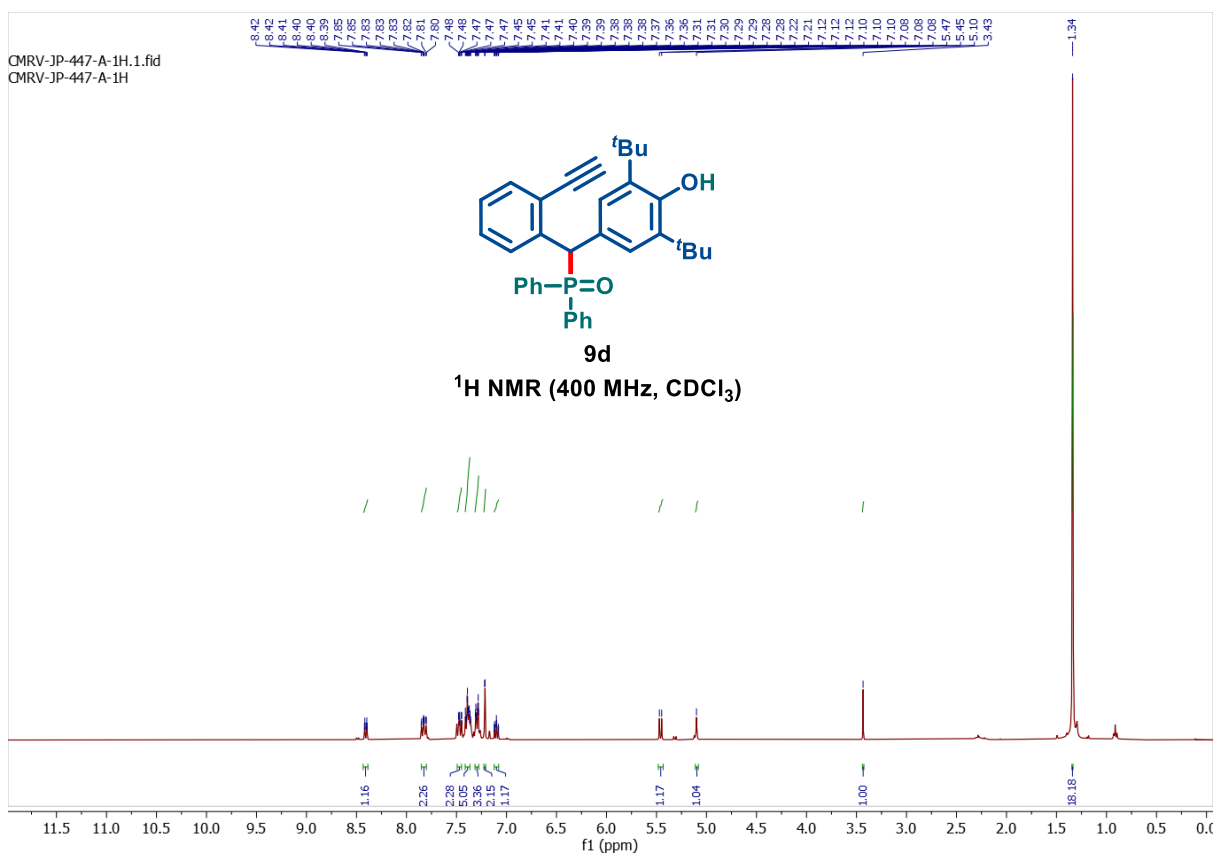





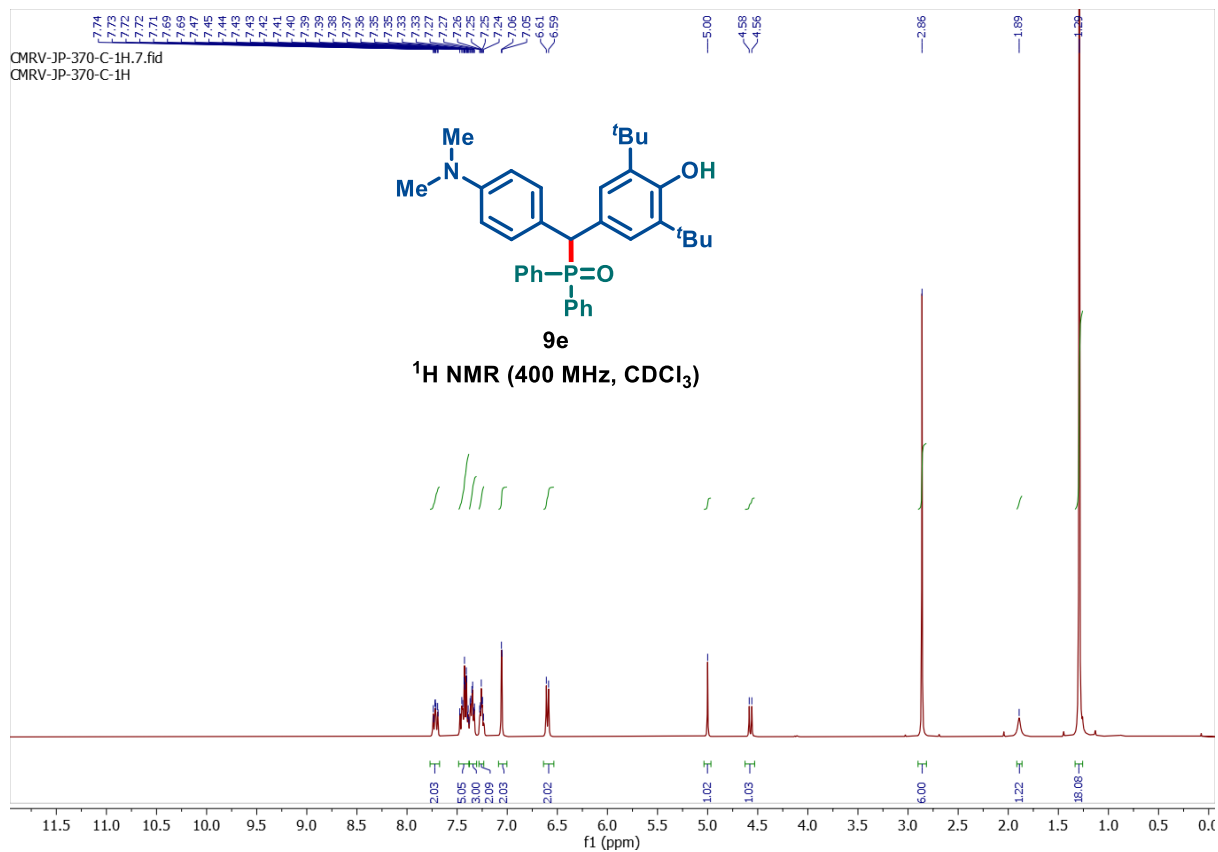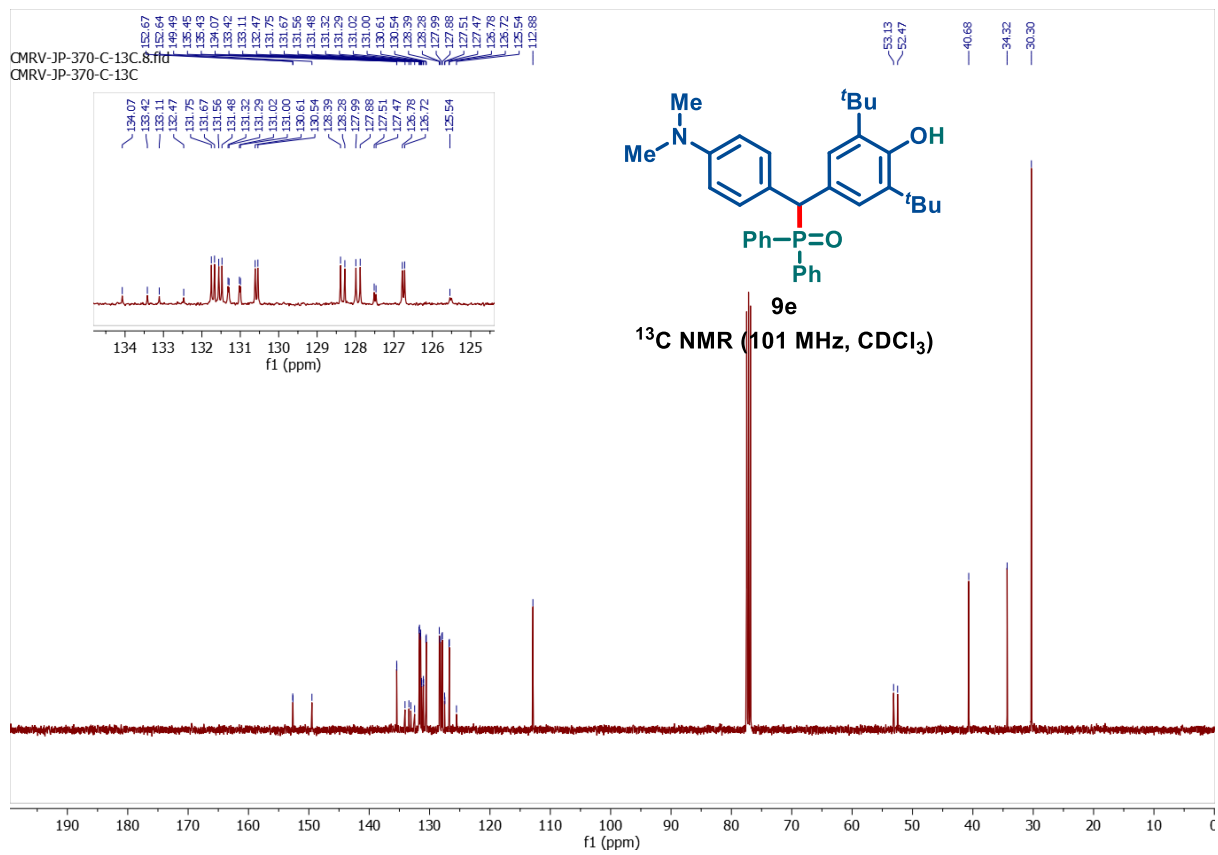

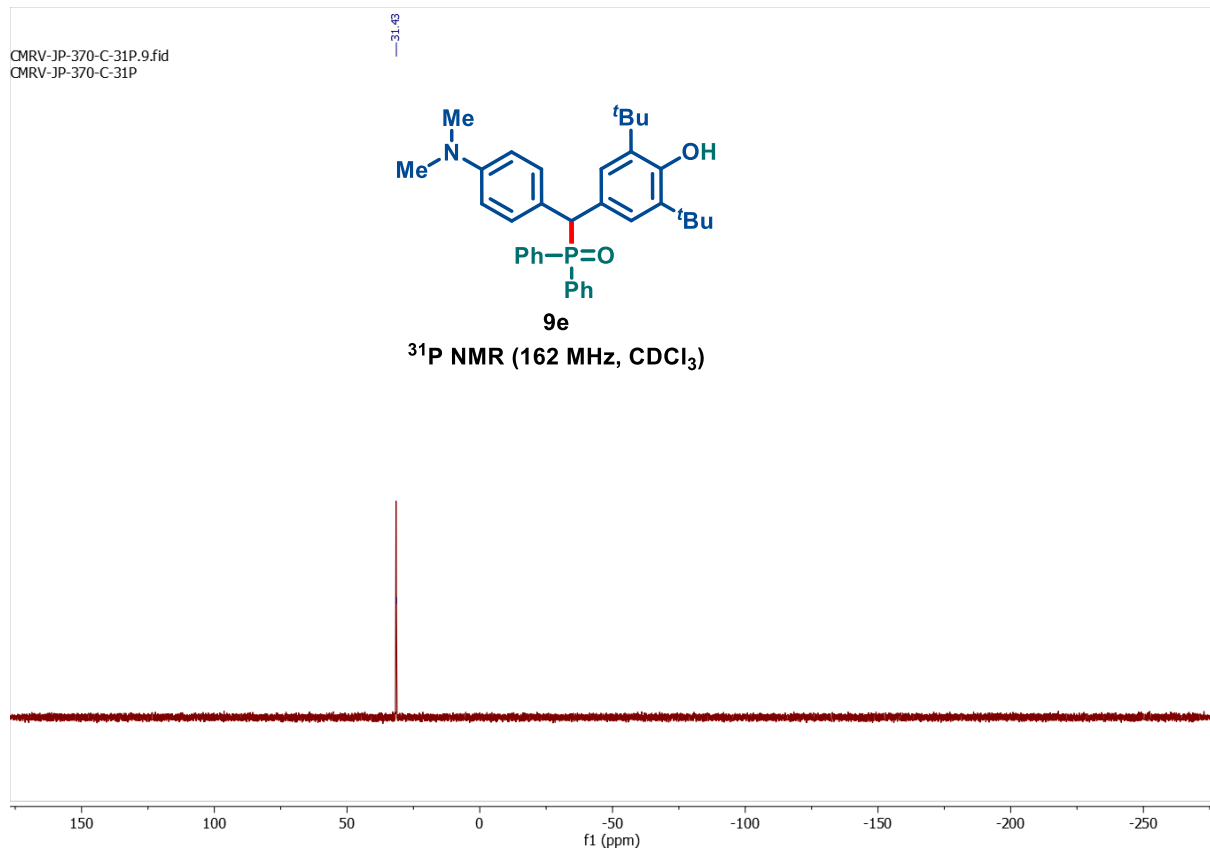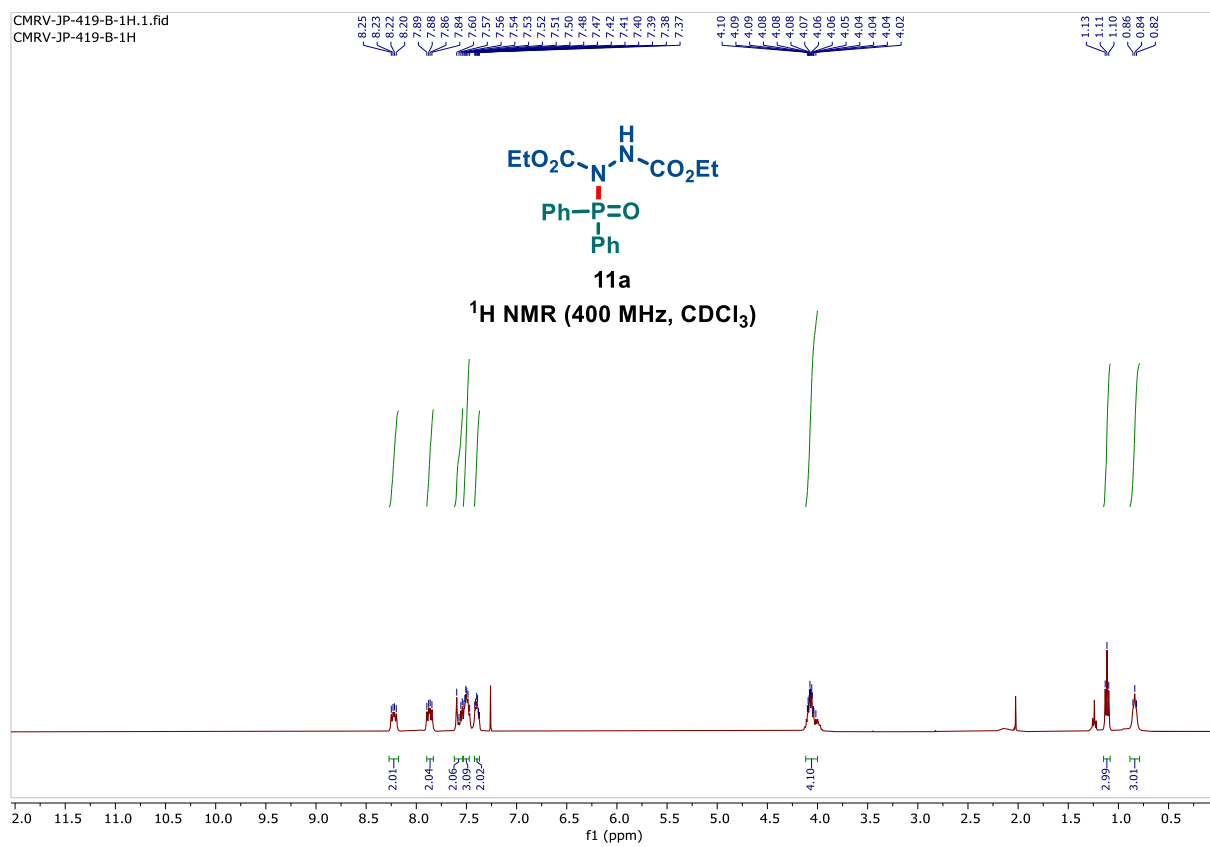

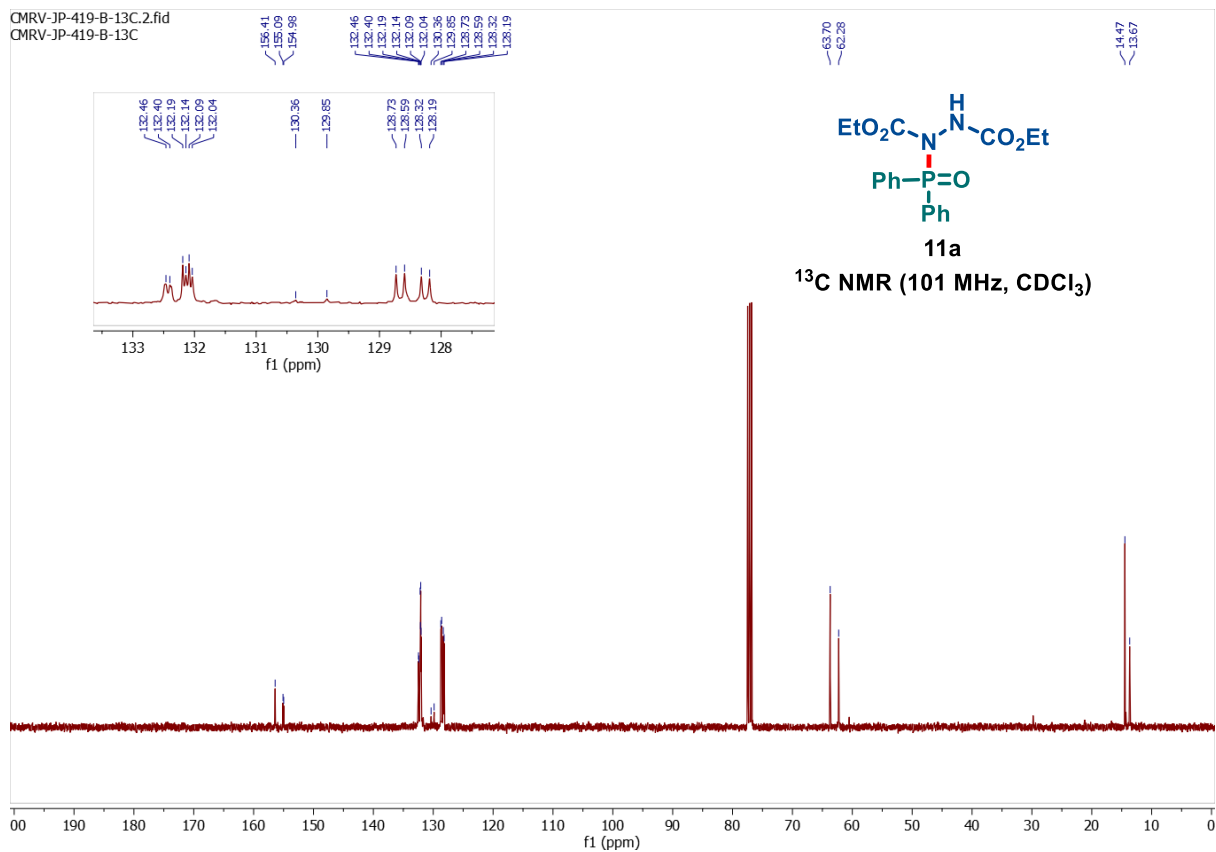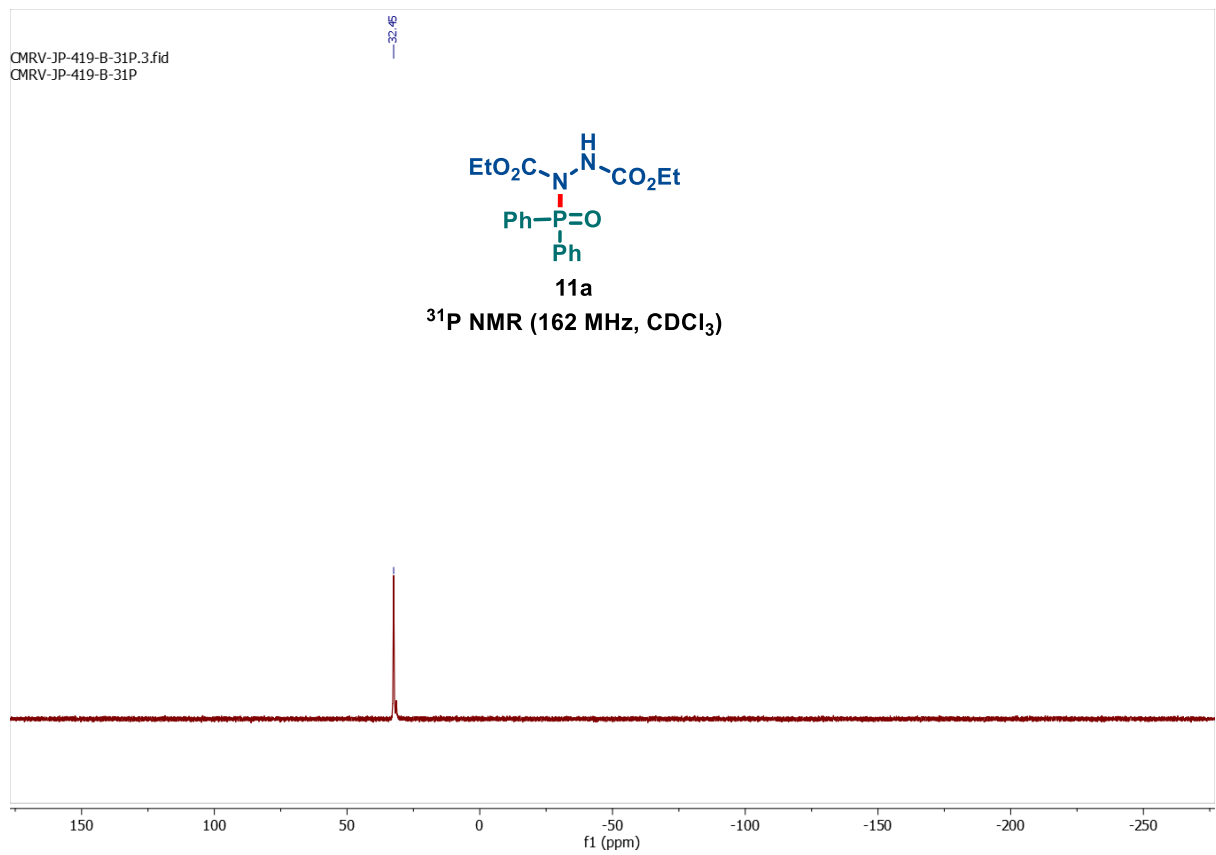

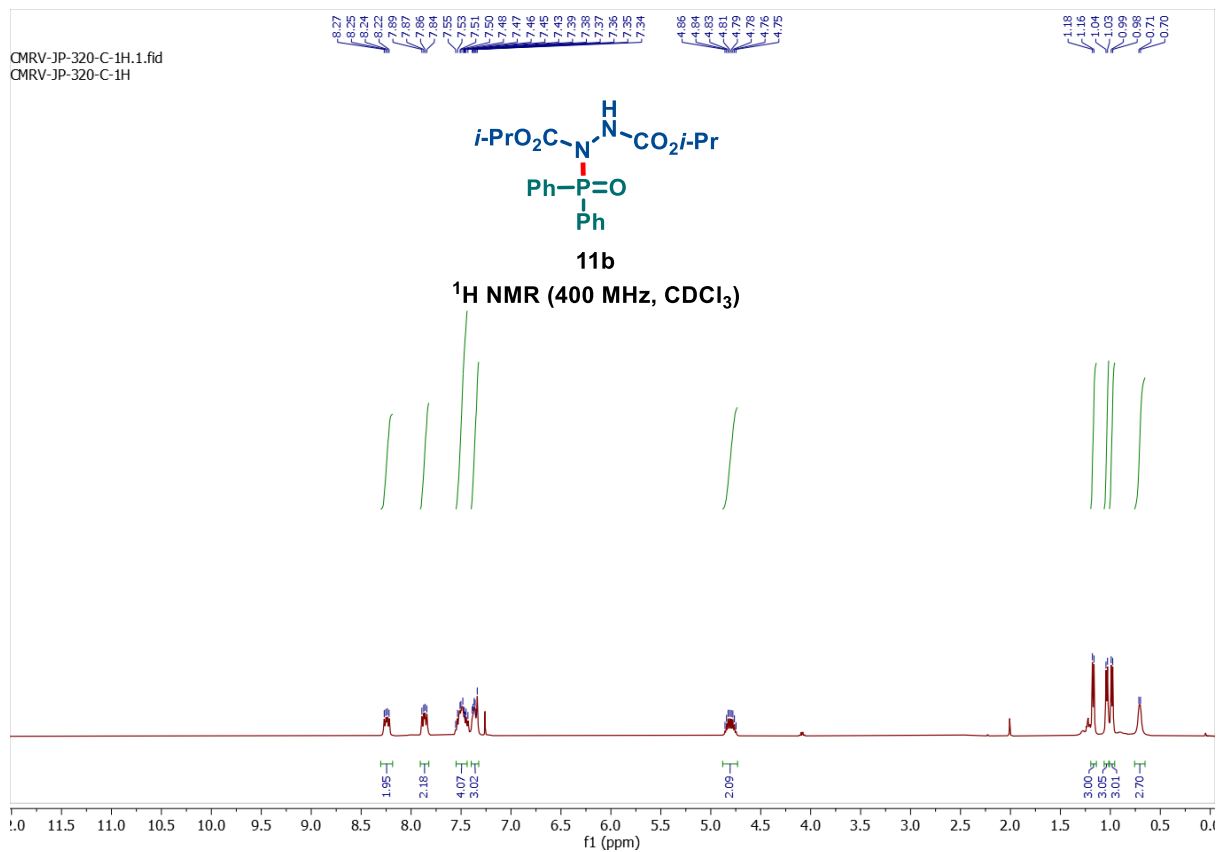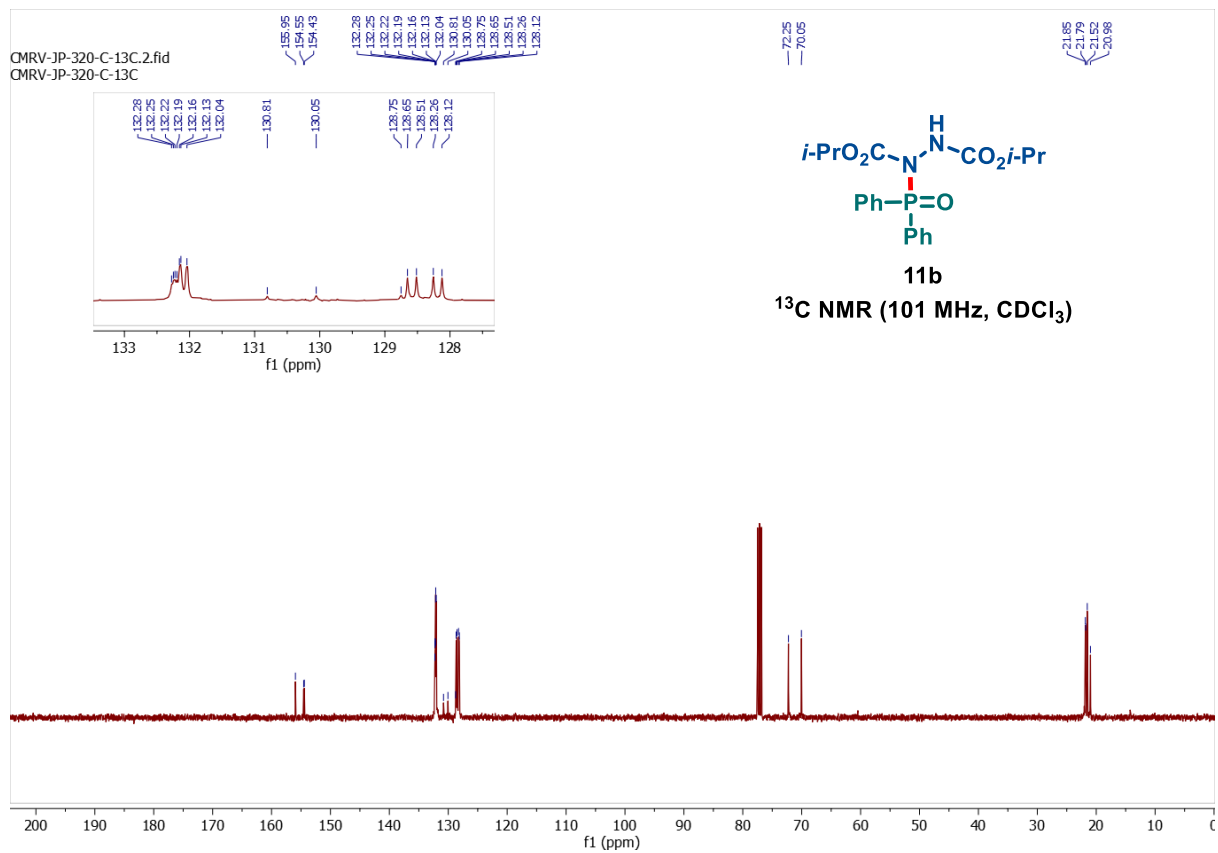

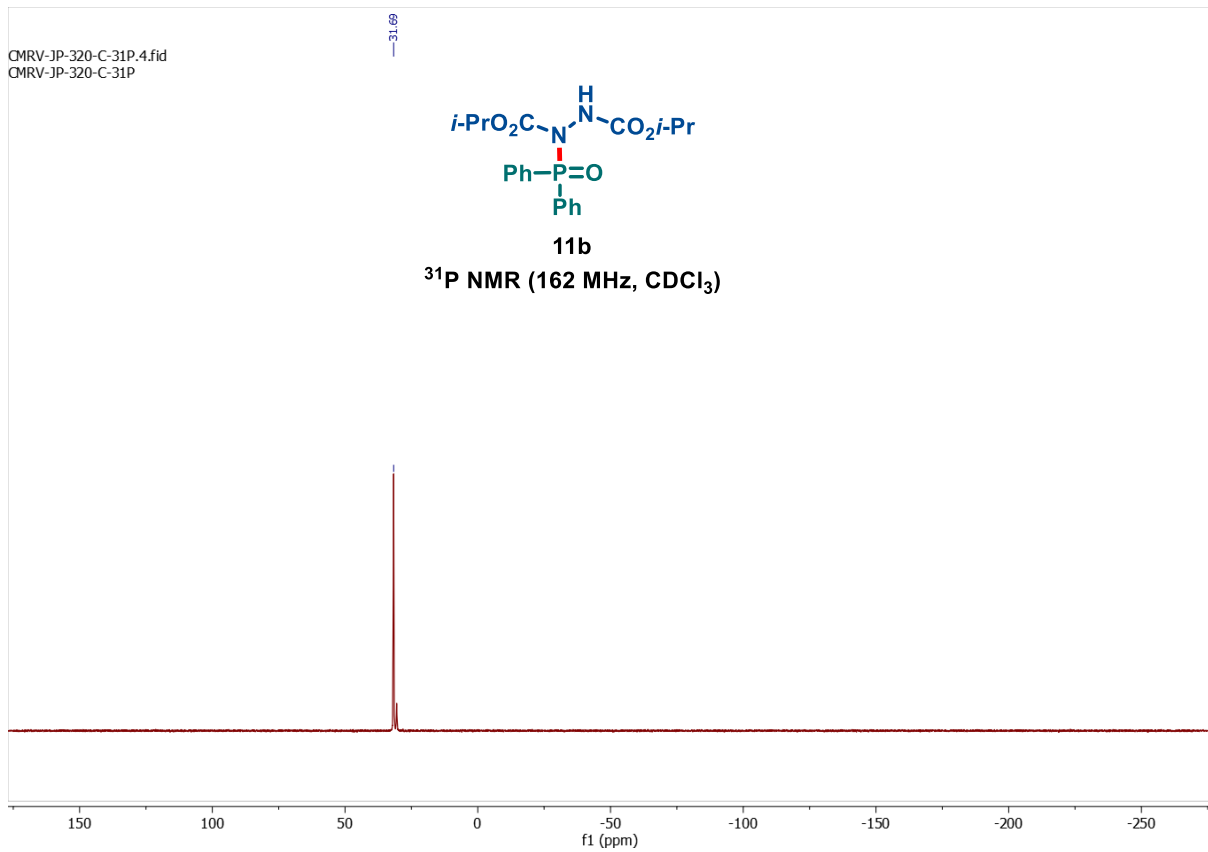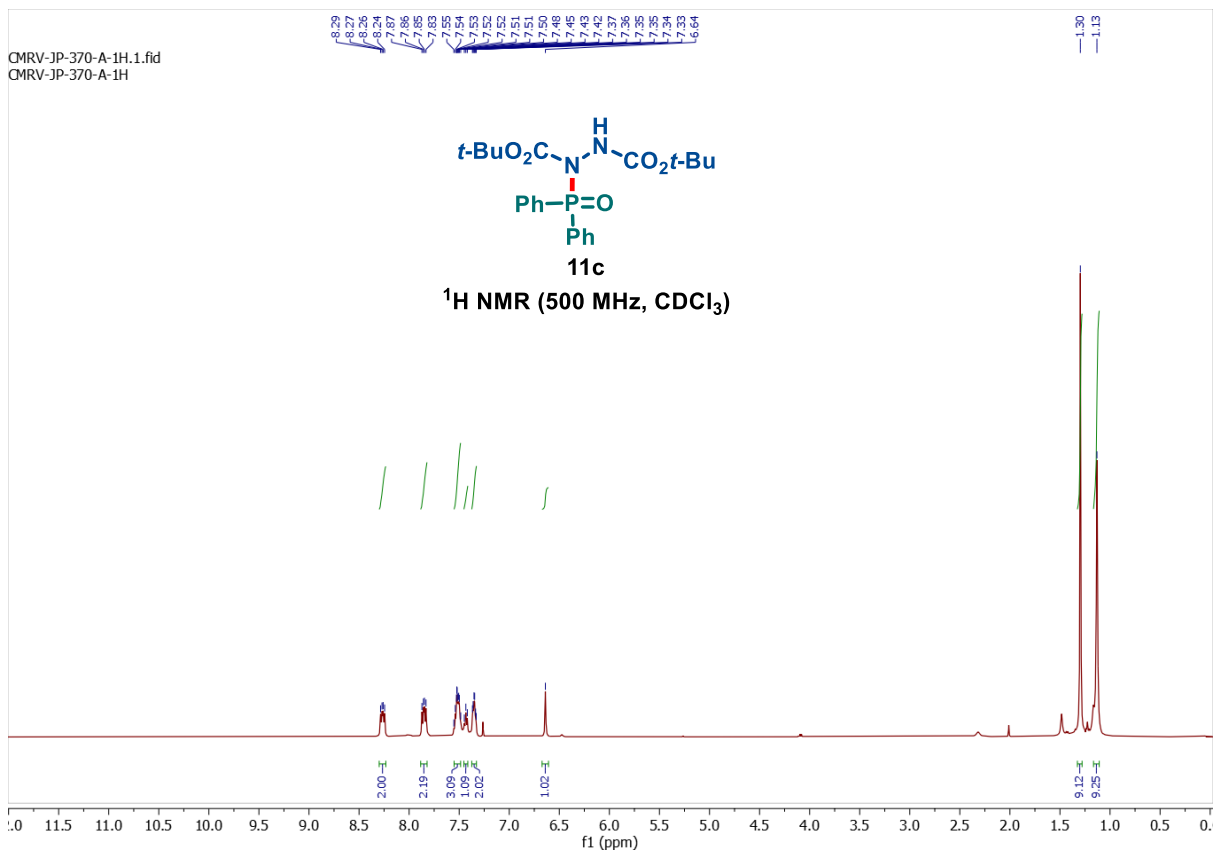

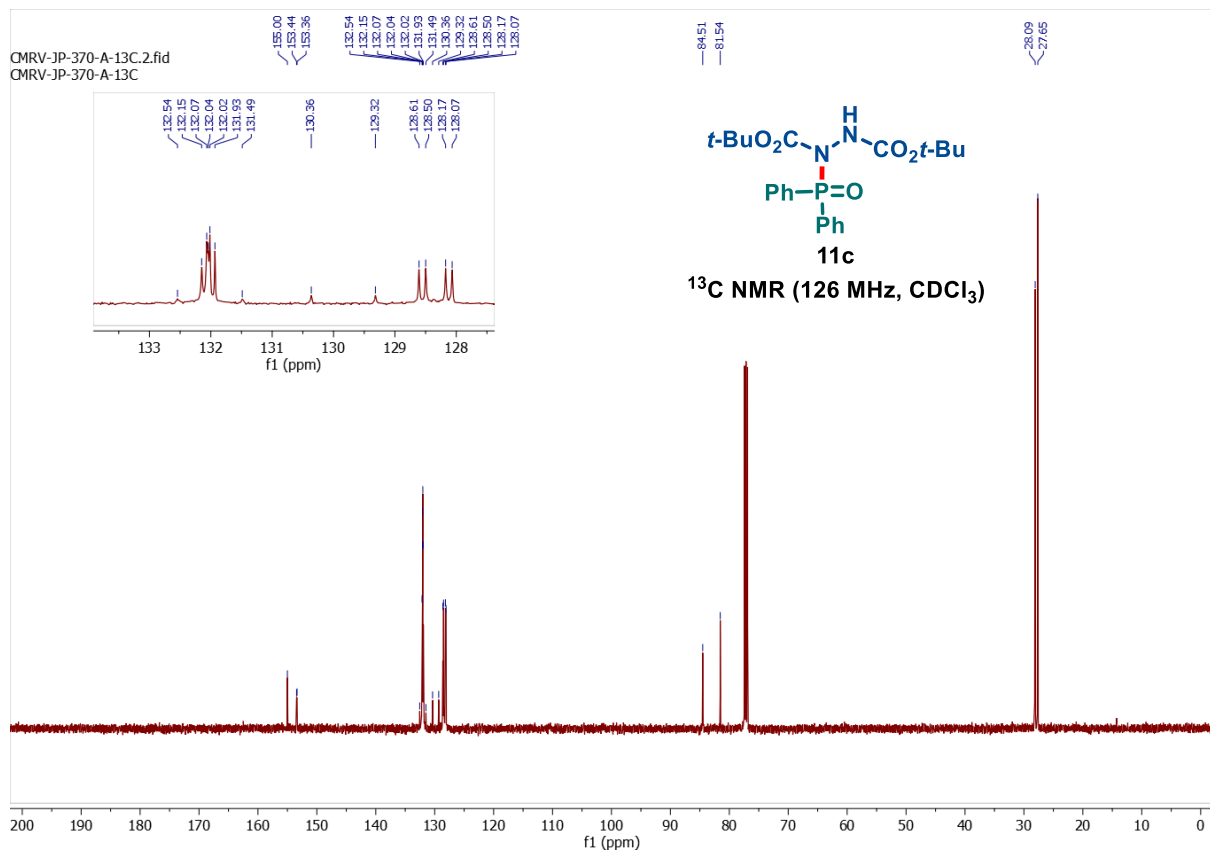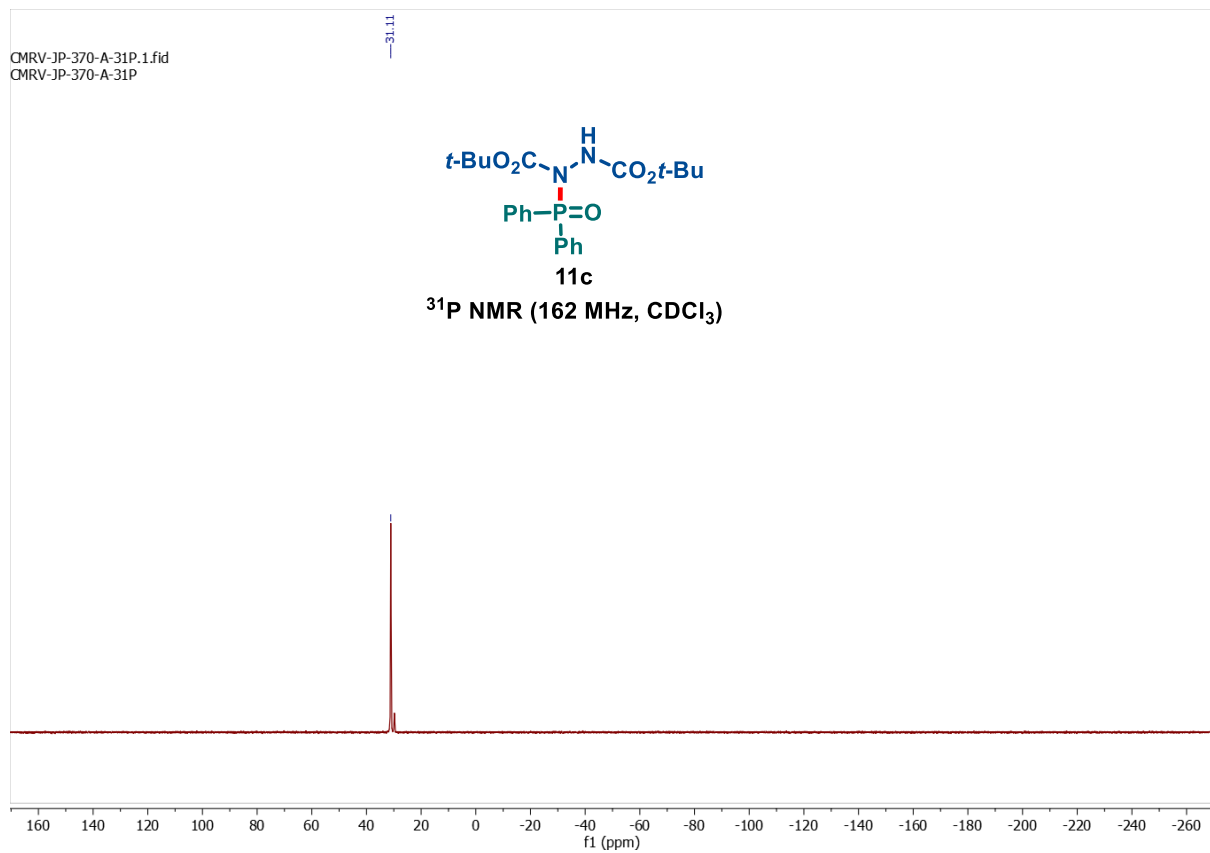

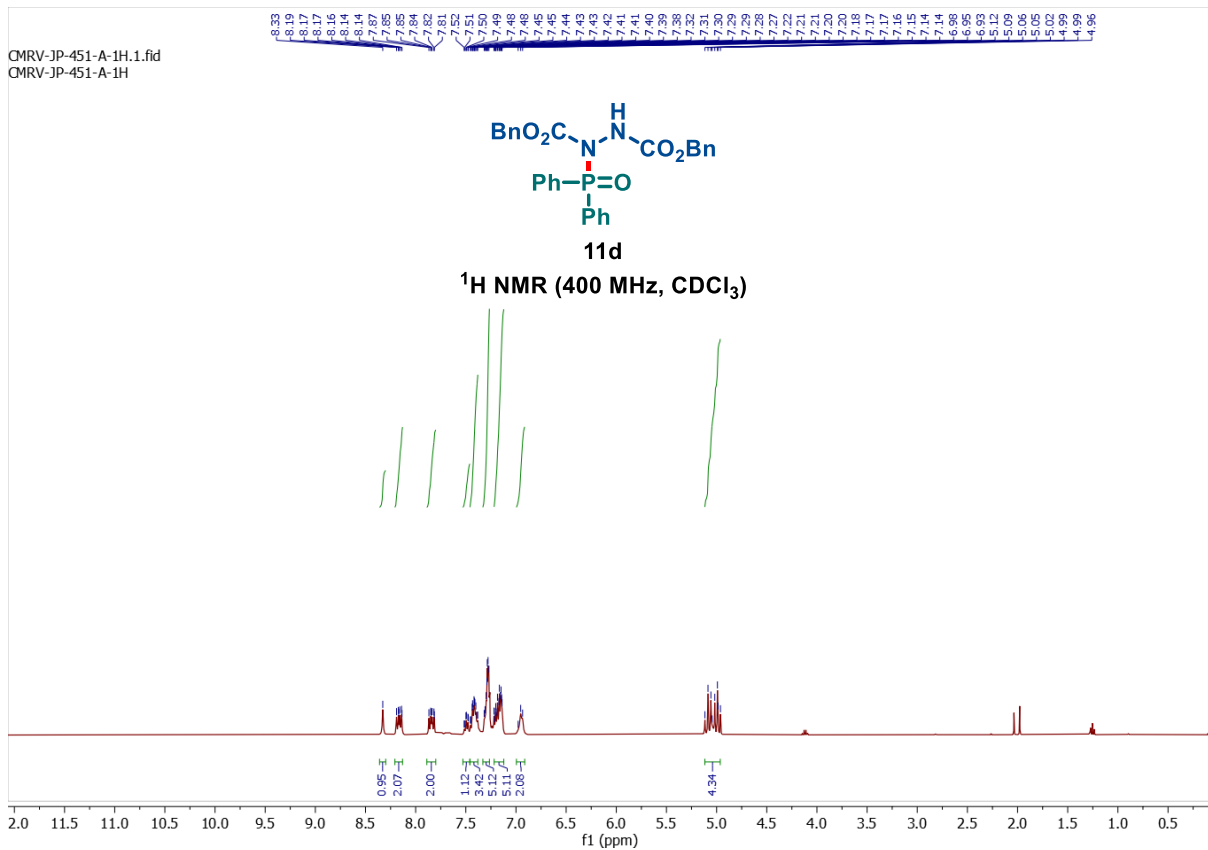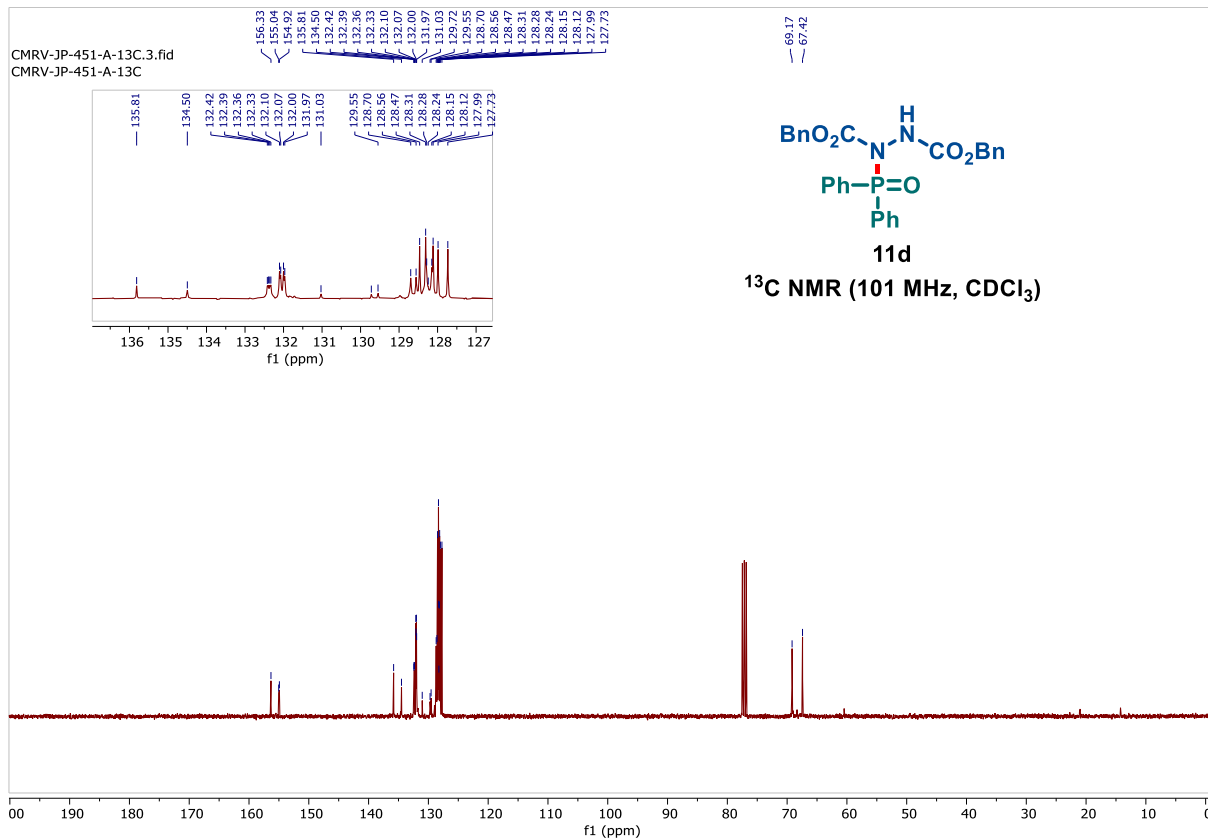

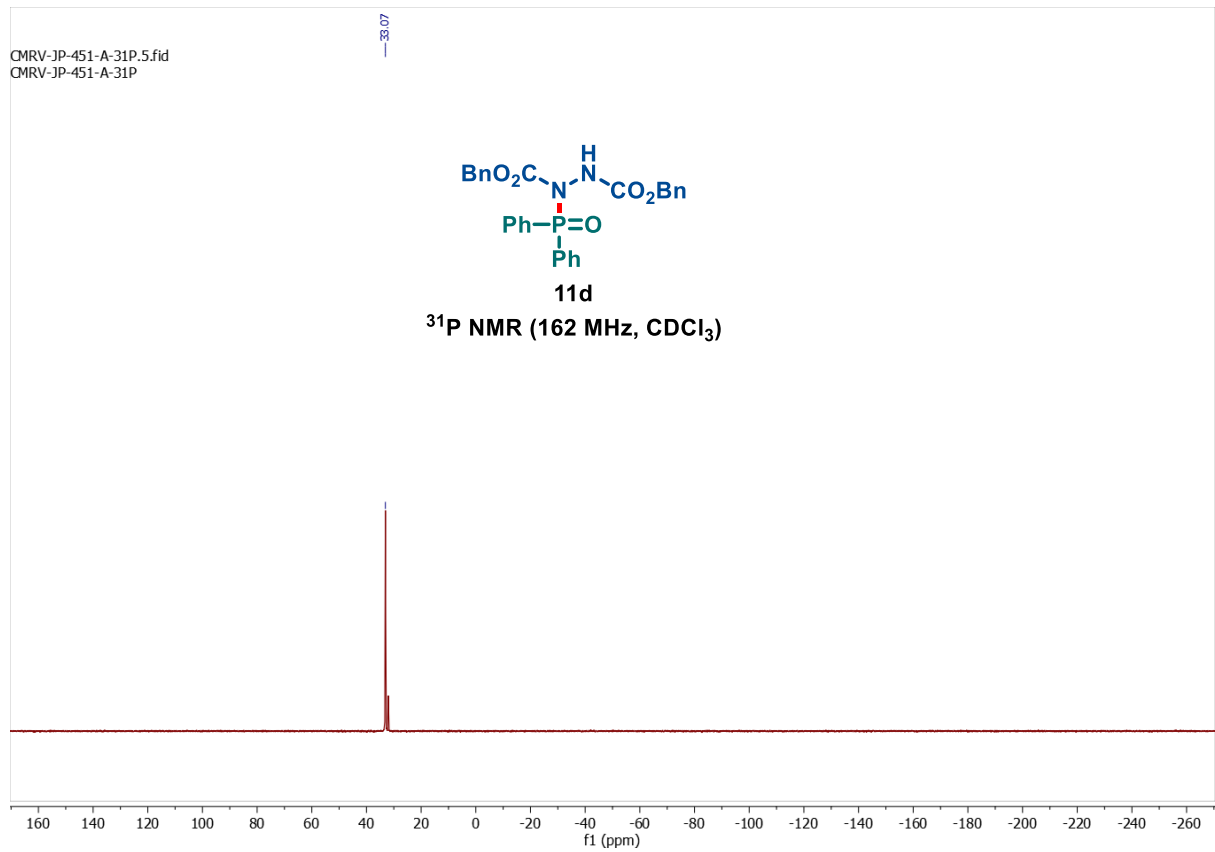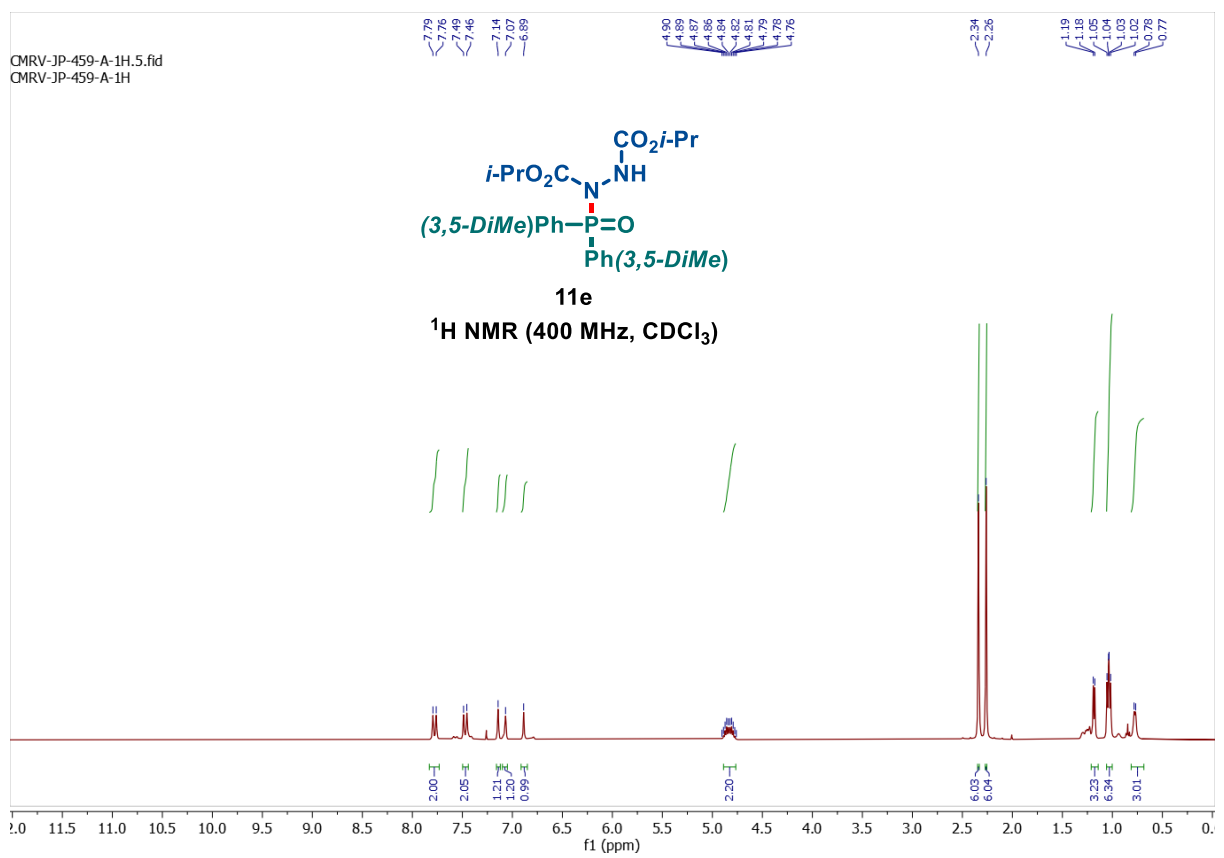



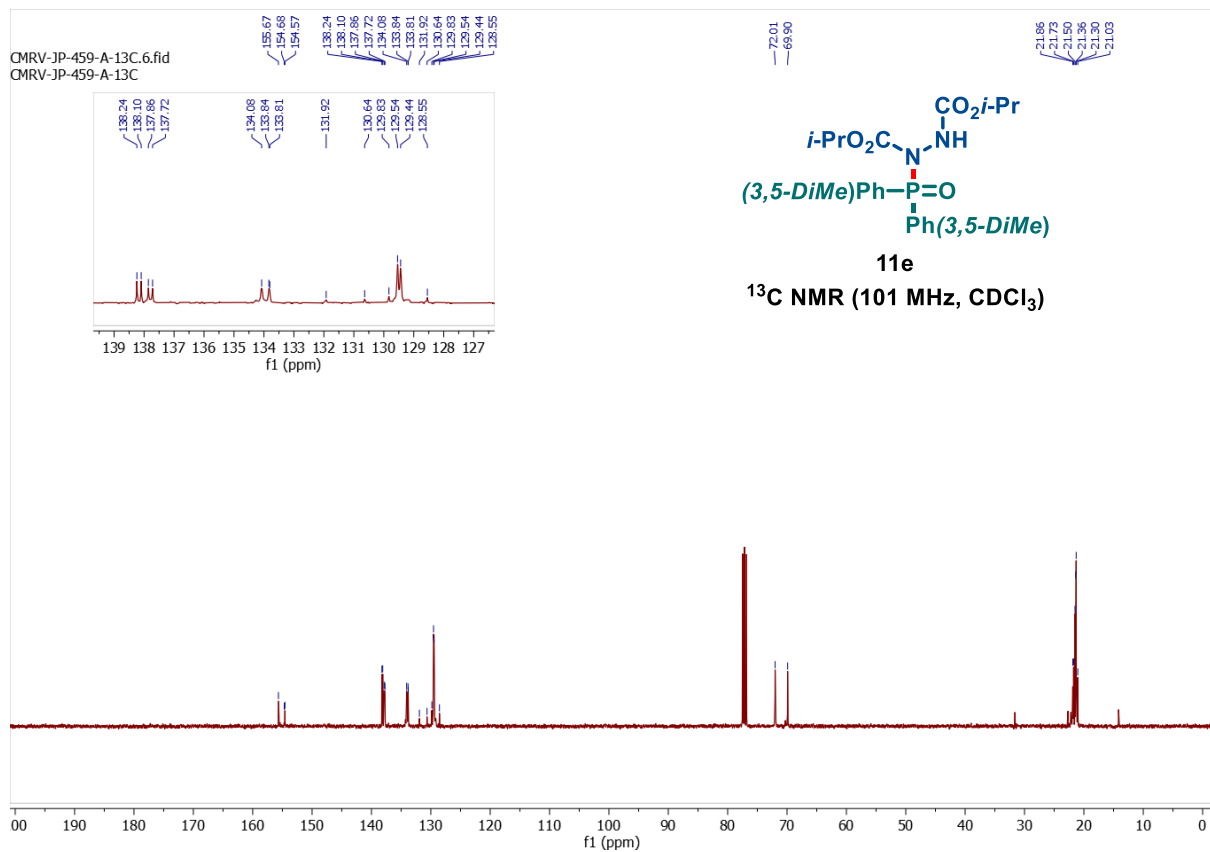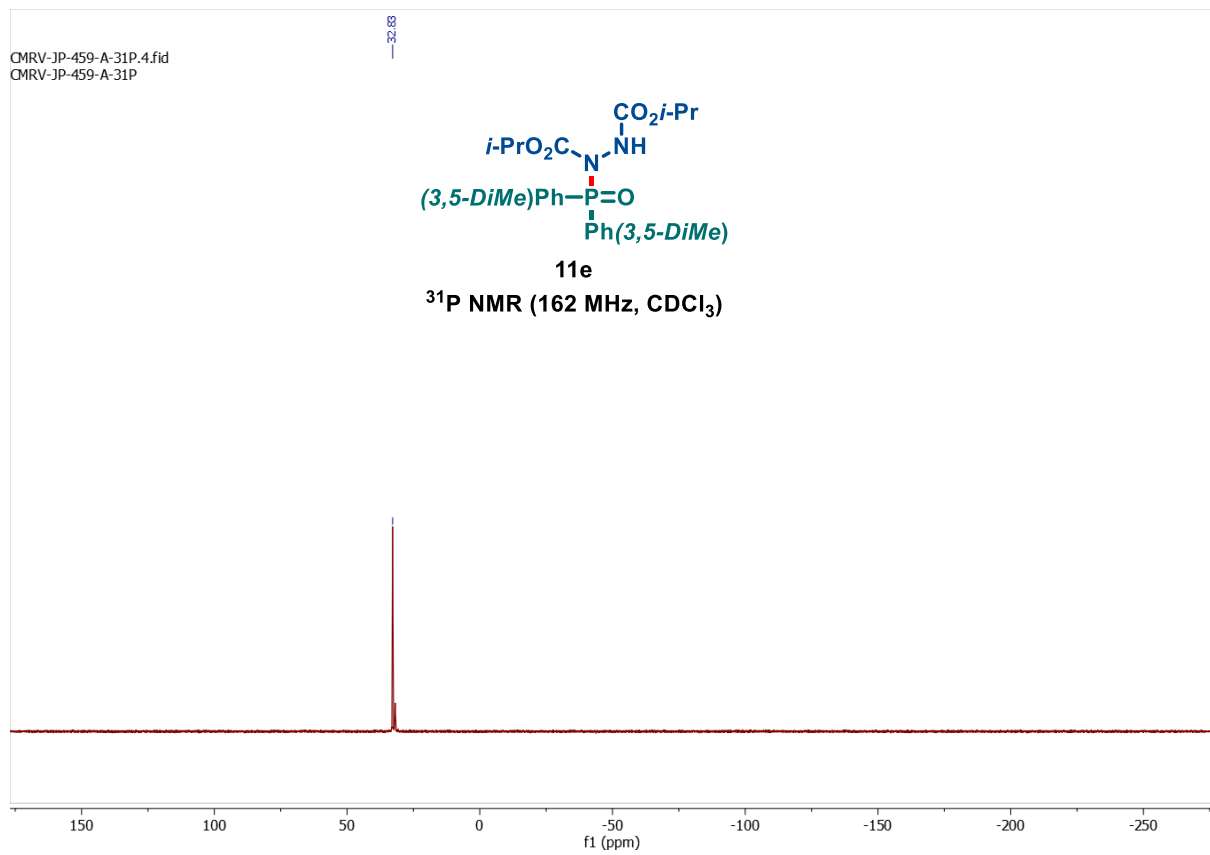

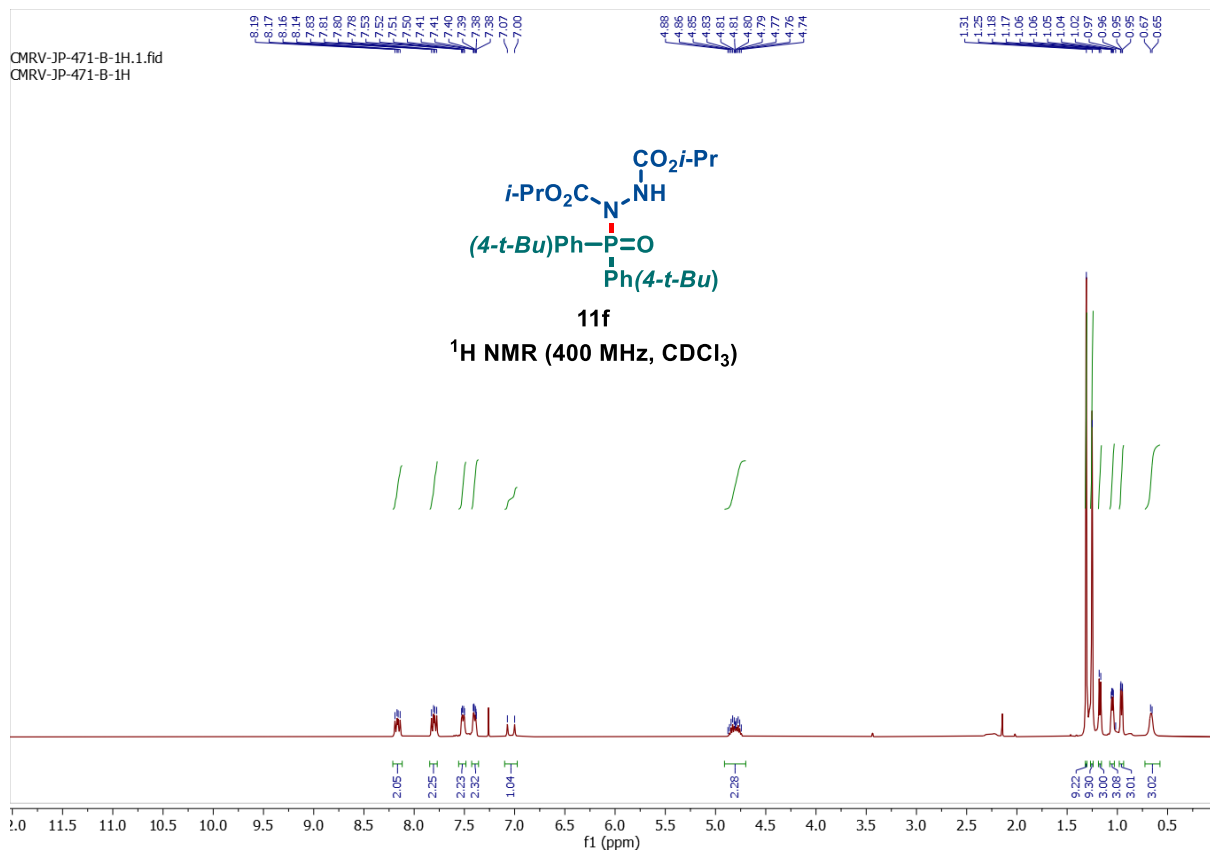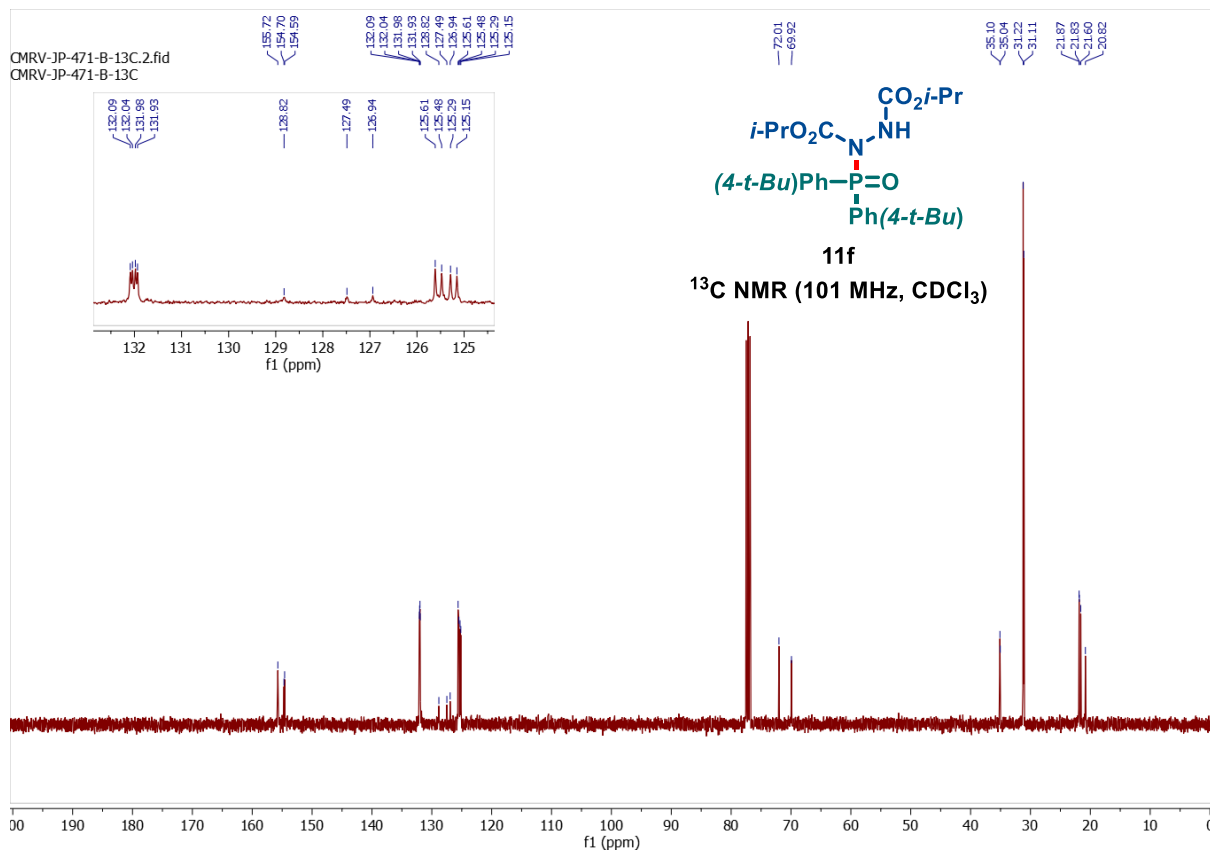



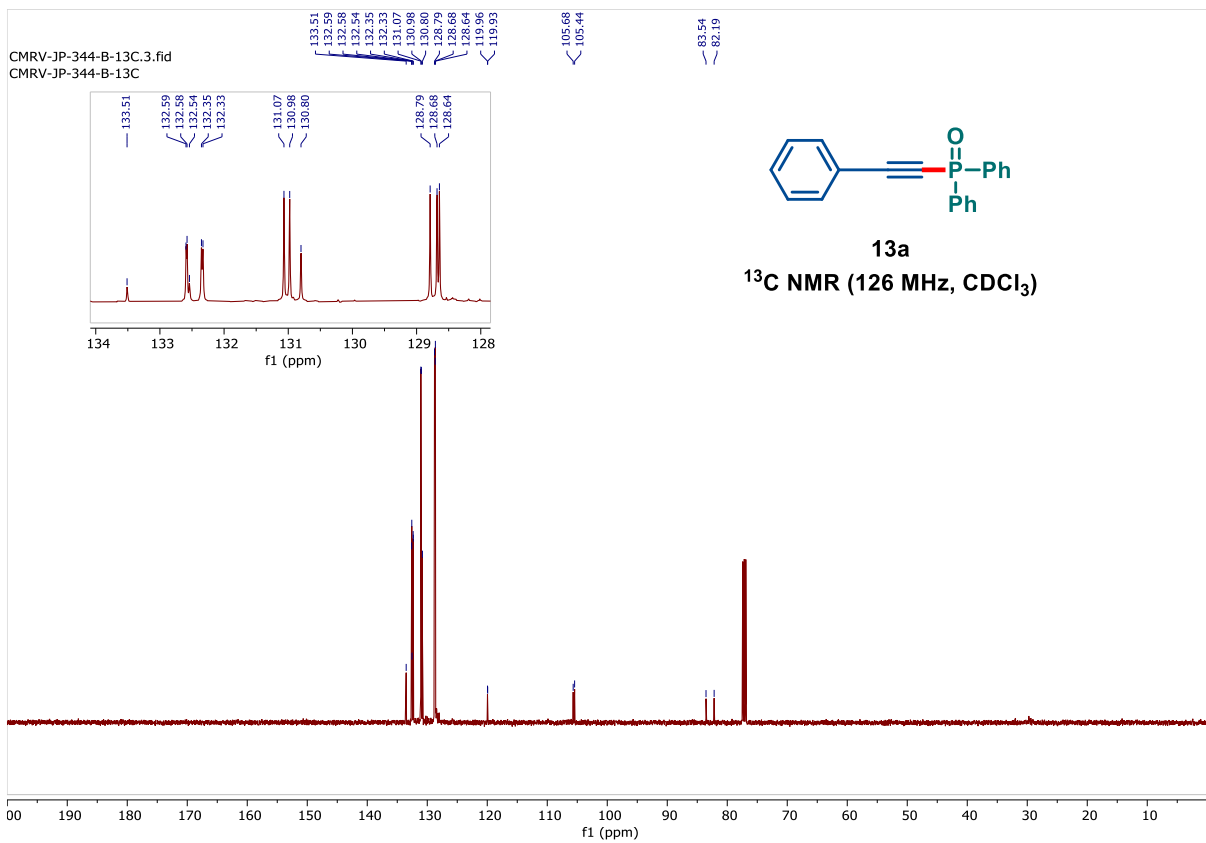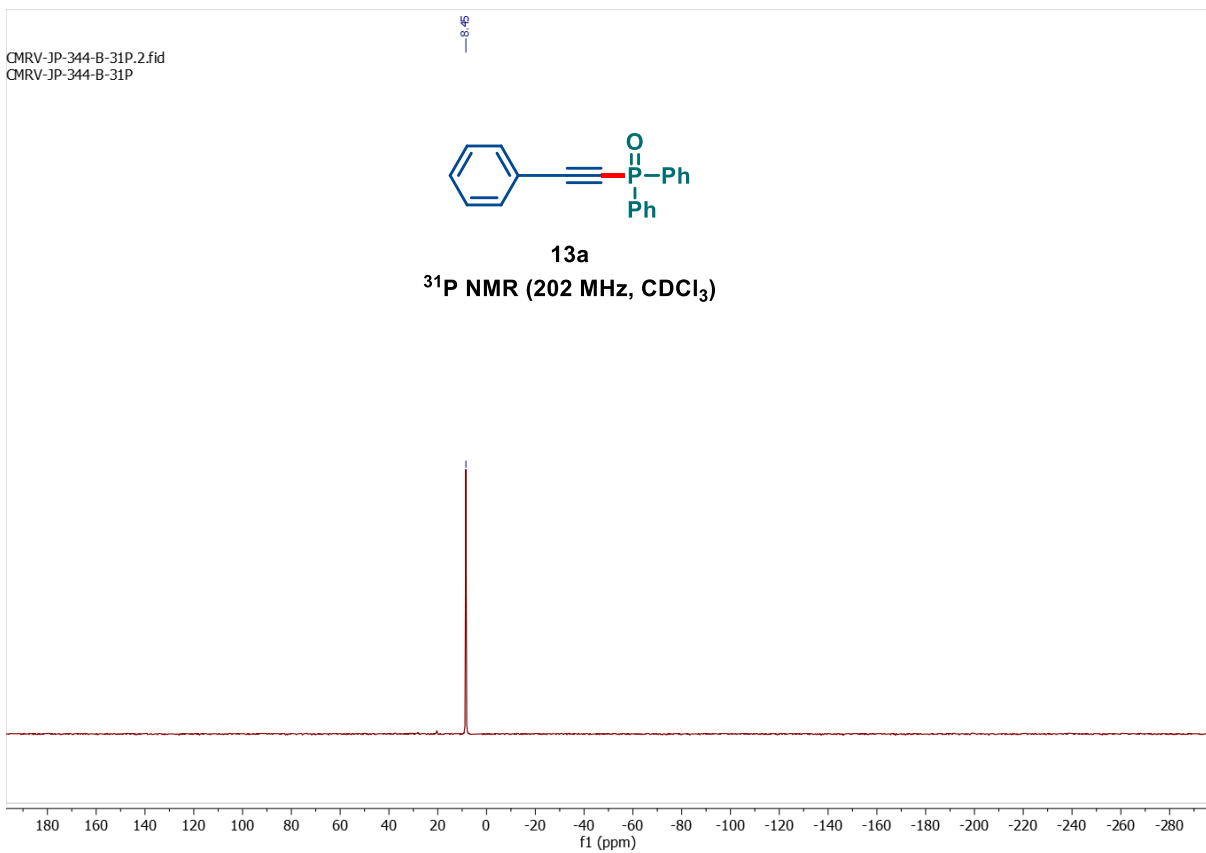

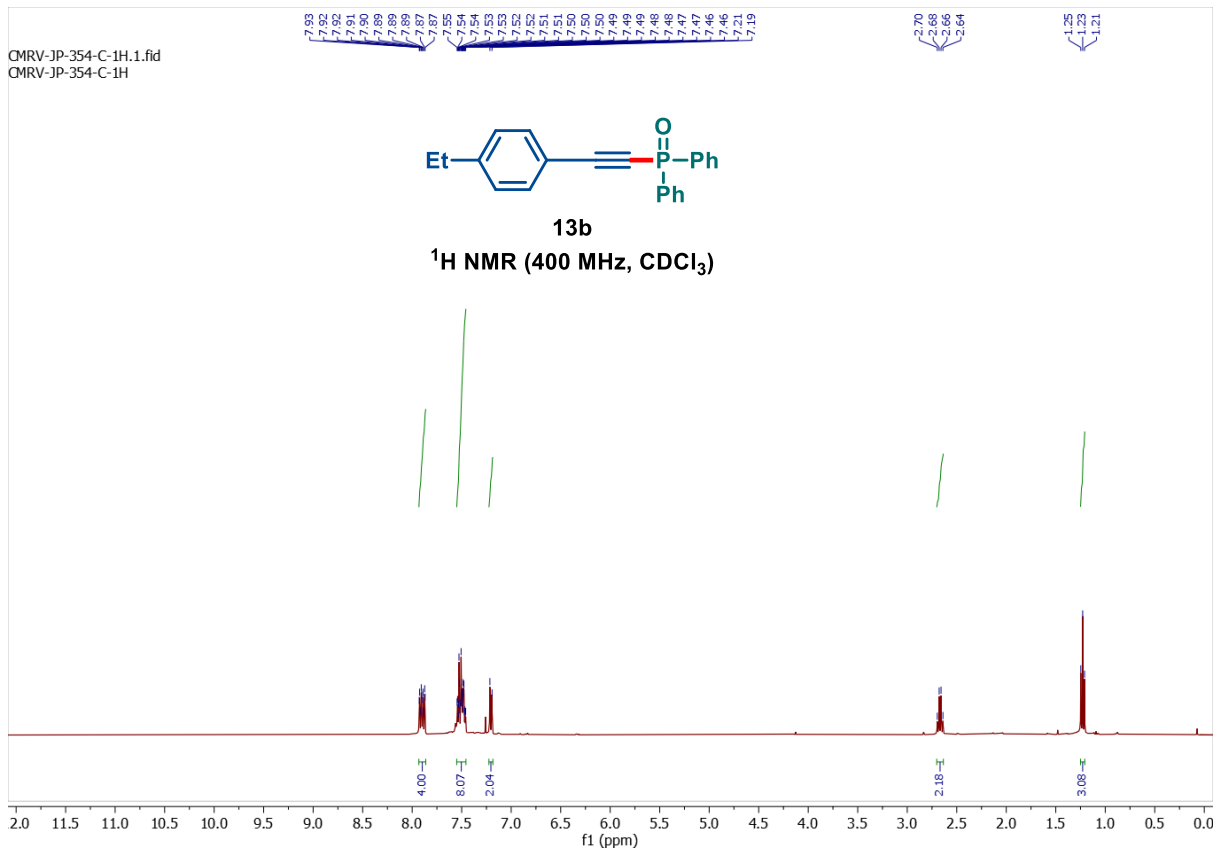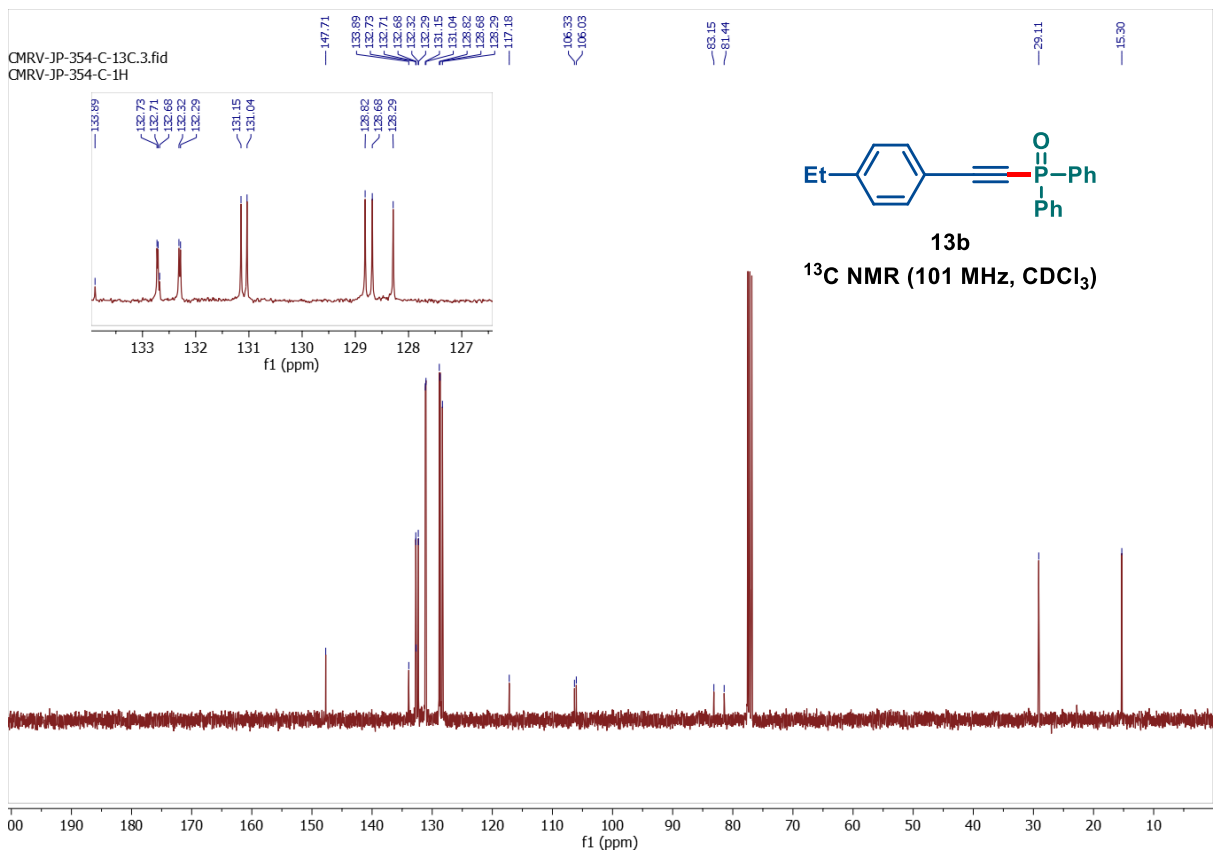

OMRV-JP-354-C-31P.10.fid  
OMRV-JP-354-C-31P

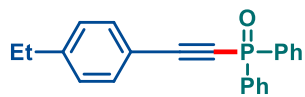

13b

<sup>31</sup>P NMR (162 MHz, CDCl<sub>3</sub>)

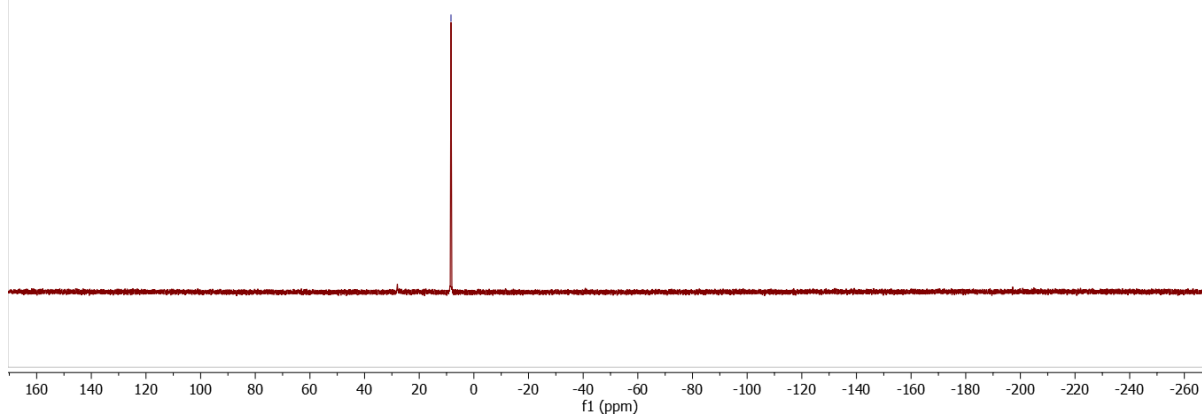

OMRV-JP-432-1H.1.fid  
OMRV-JP-432-1H

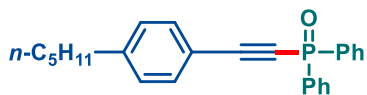

13c

<sup>1</sup>H NMR (400 MHz, CDCl<sub>3</sub>)

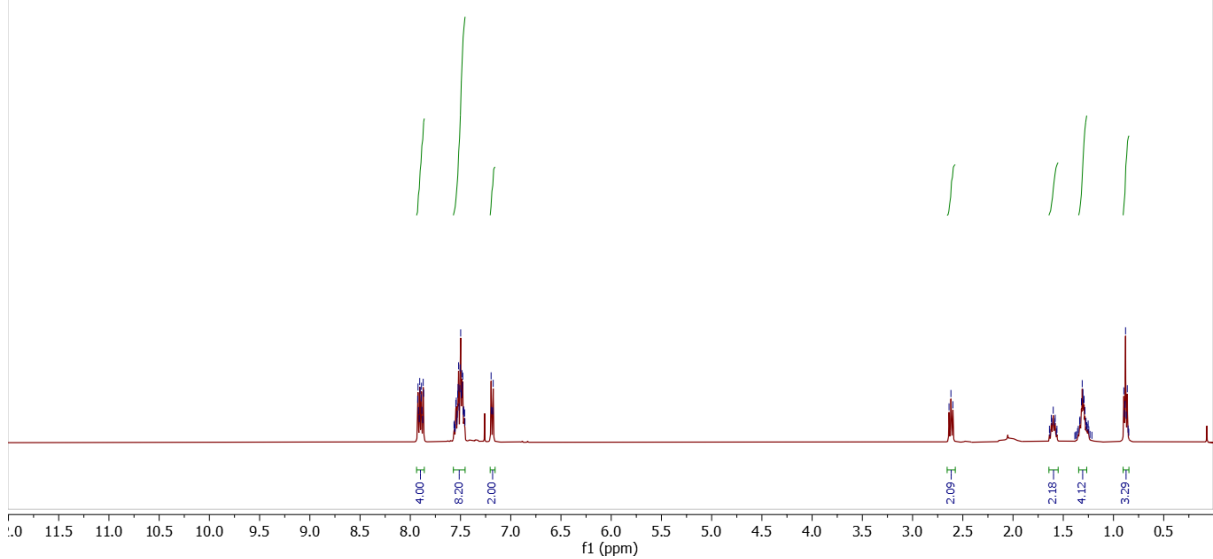

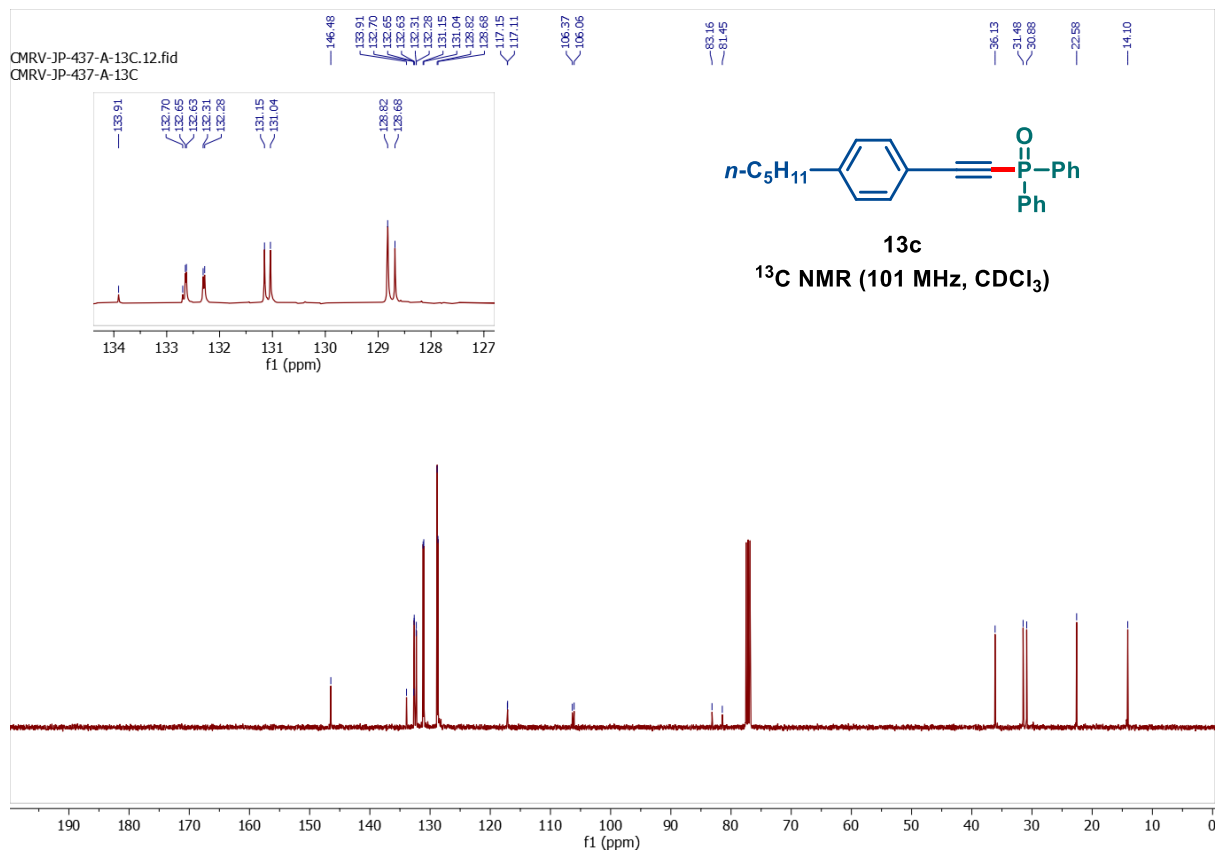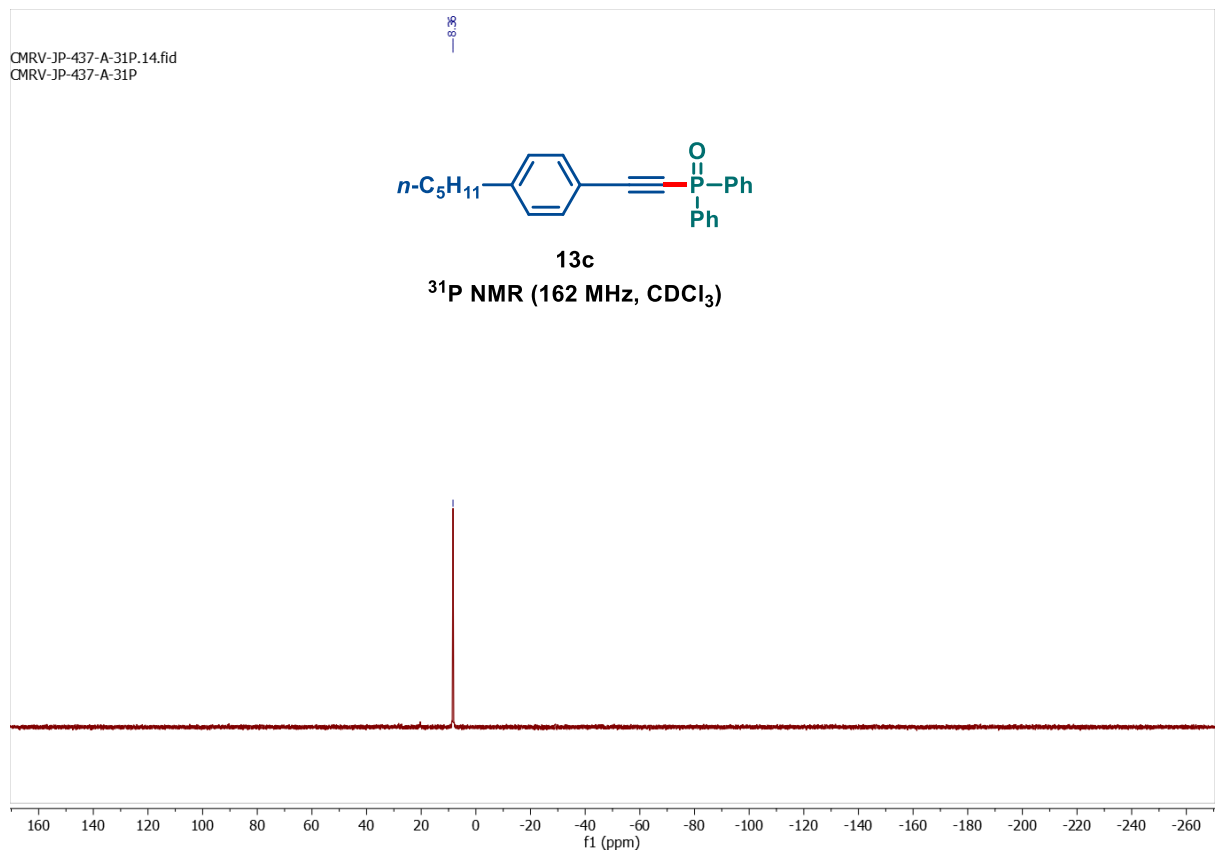

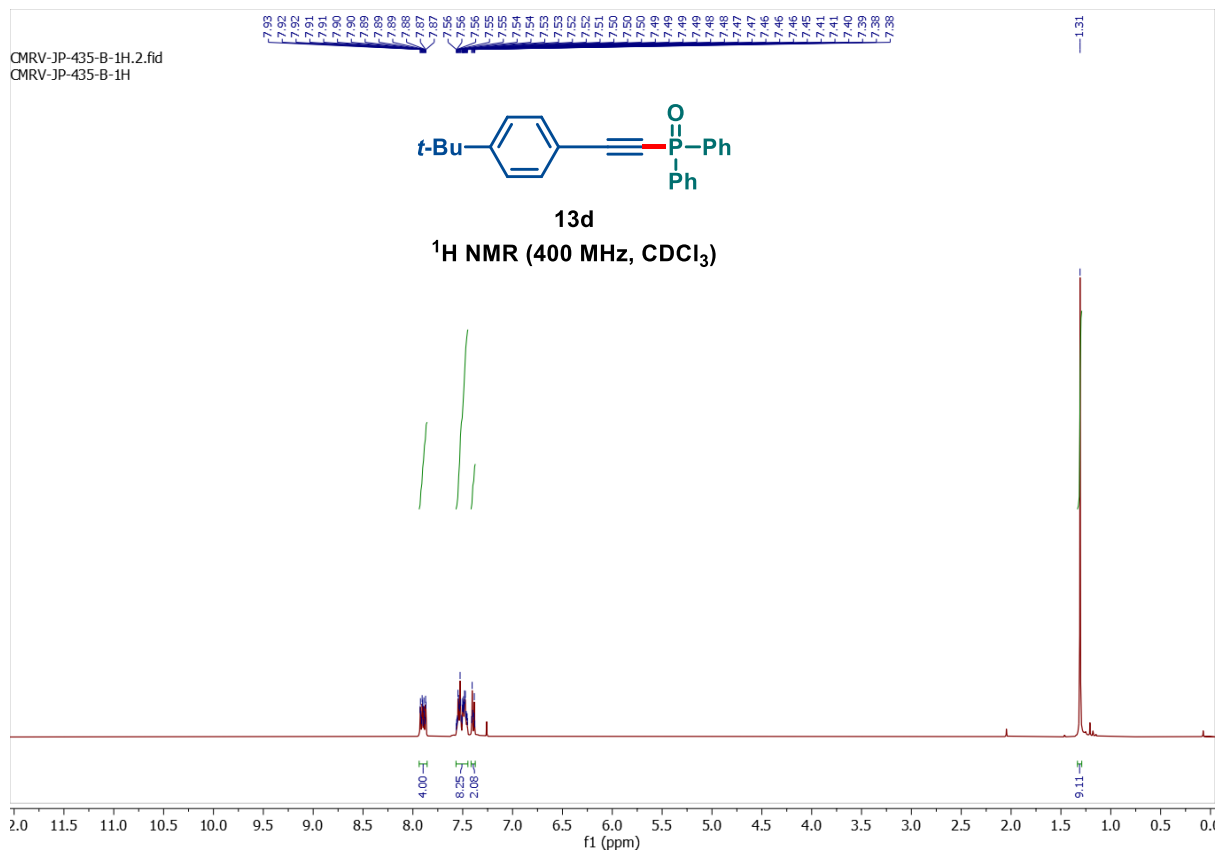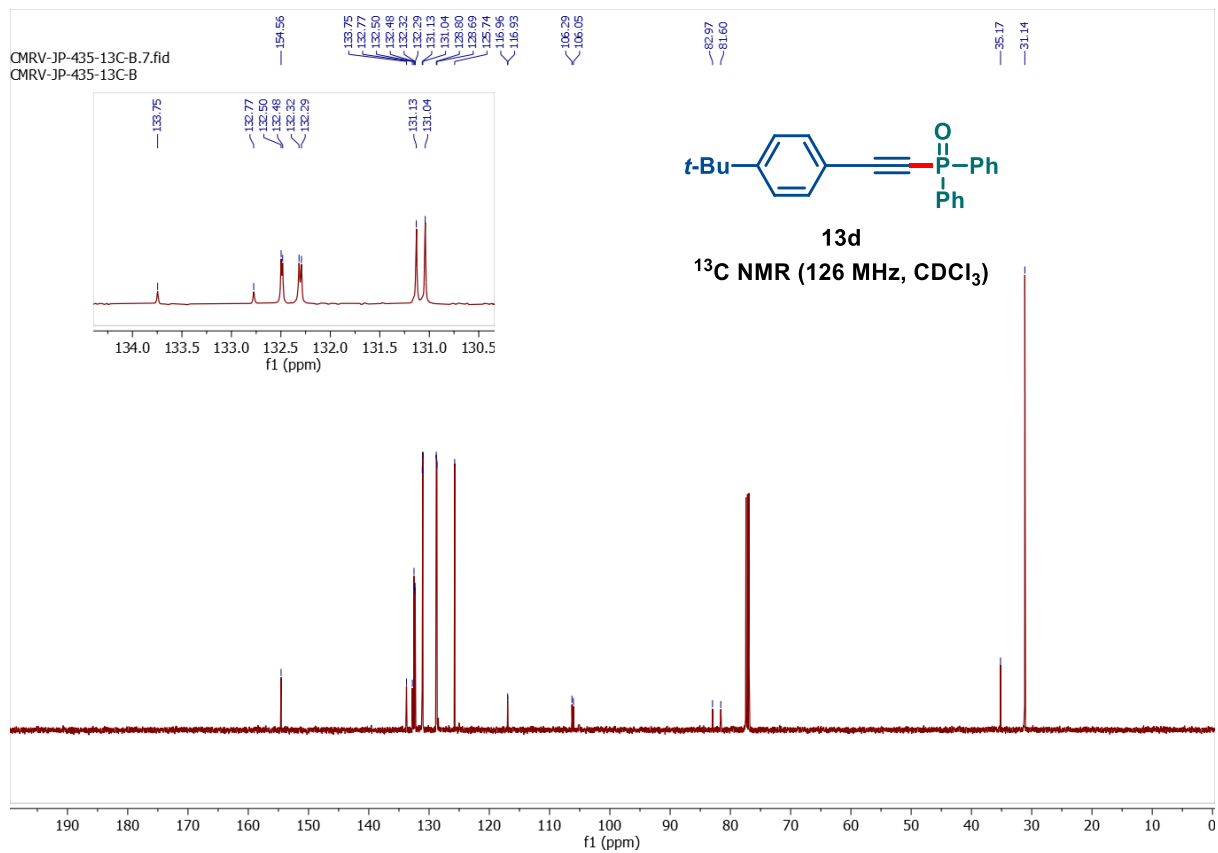



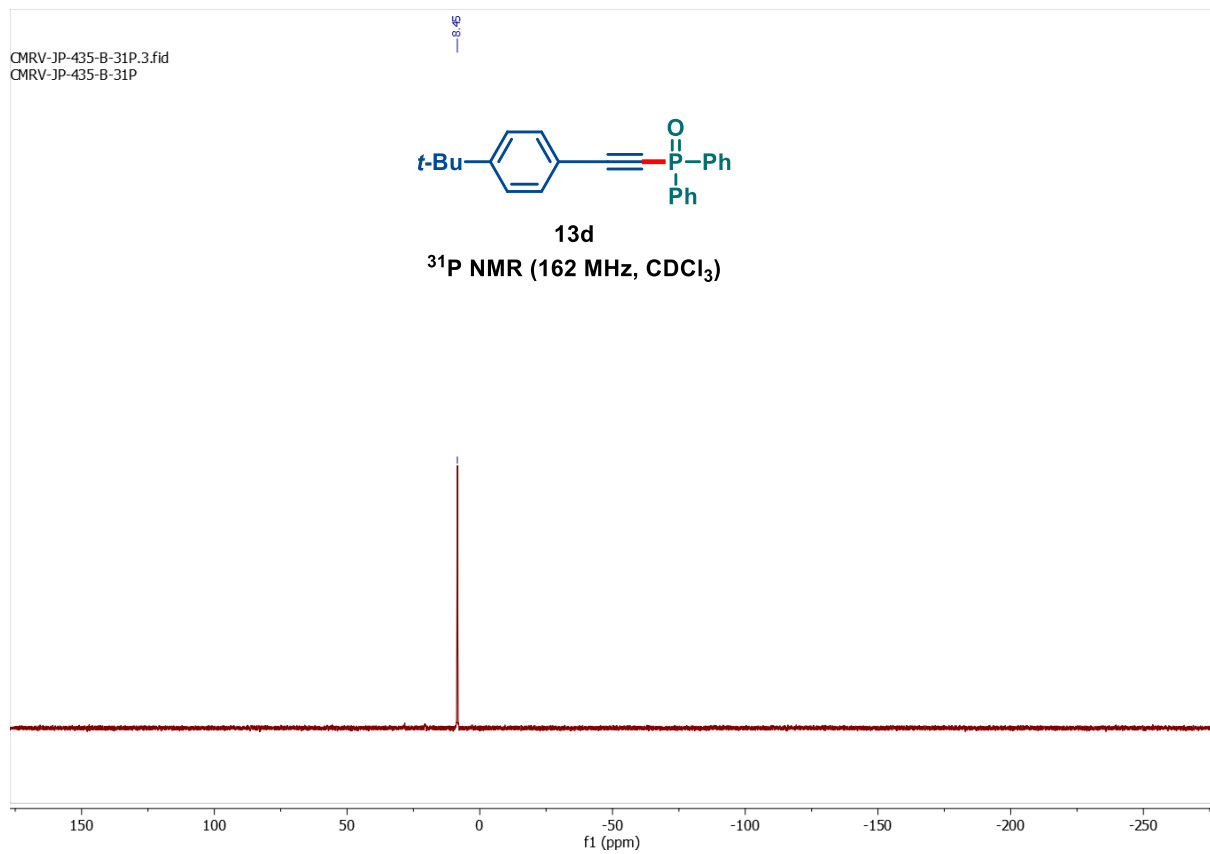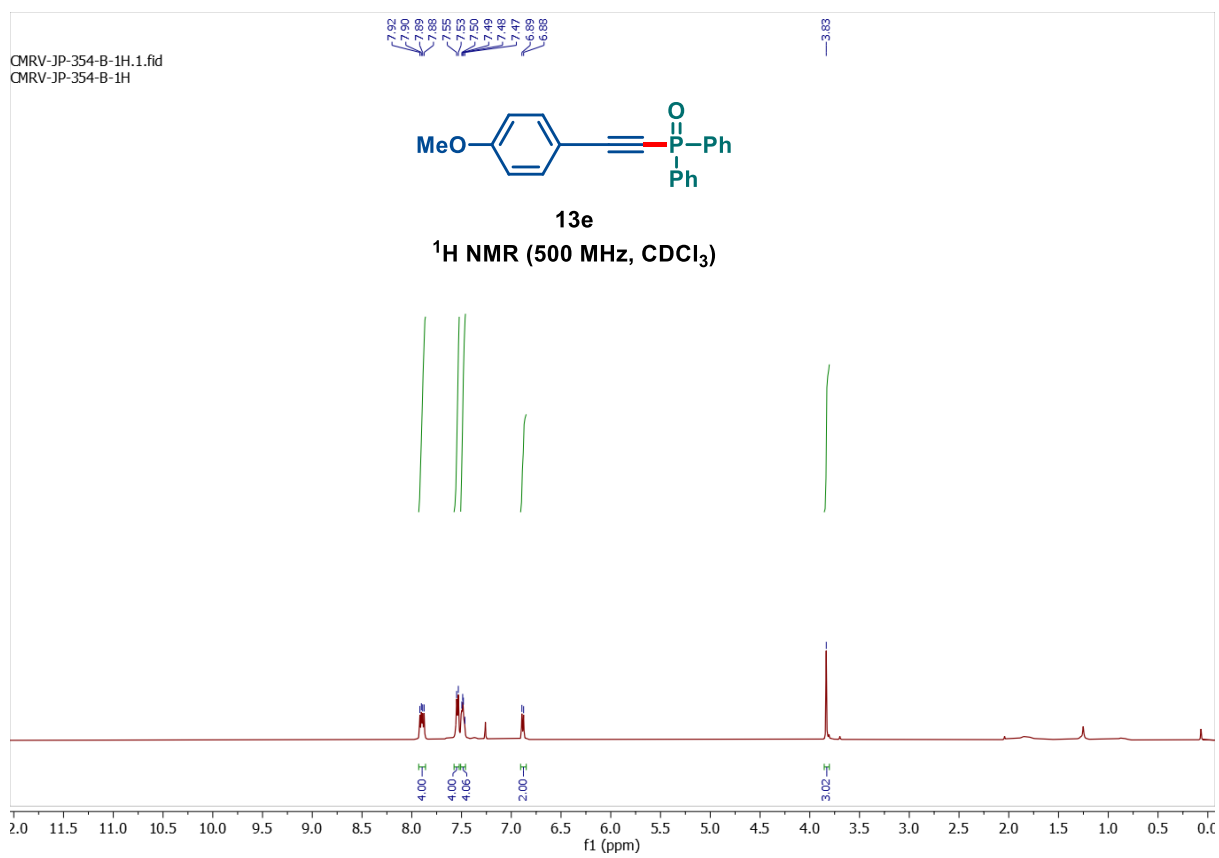

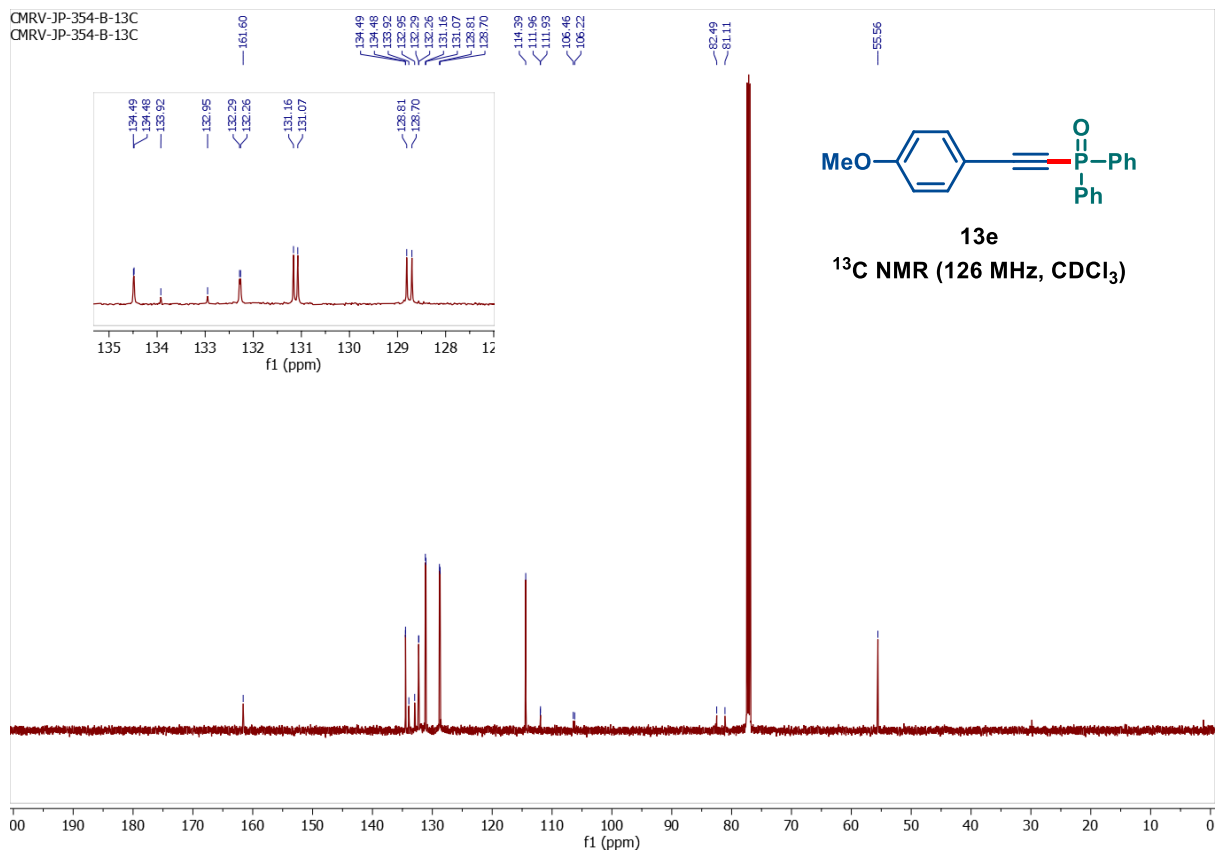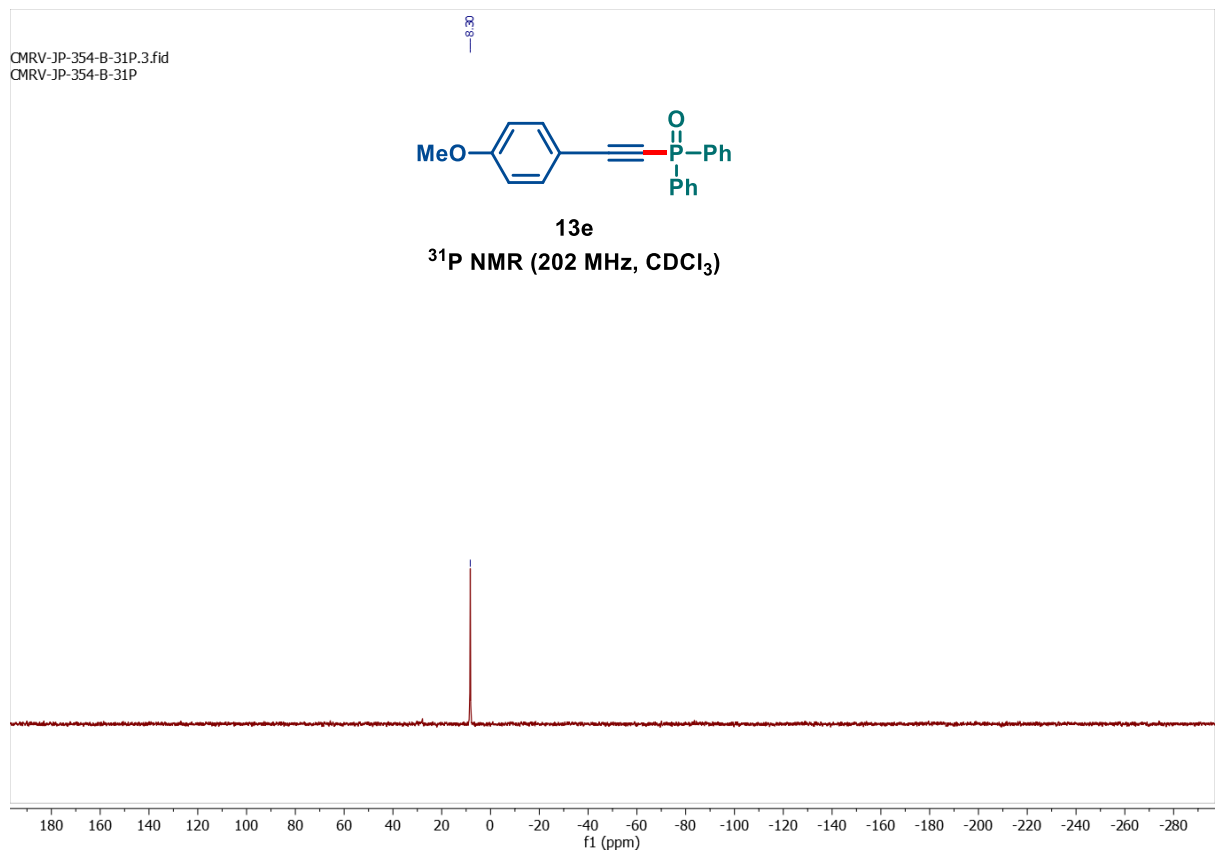

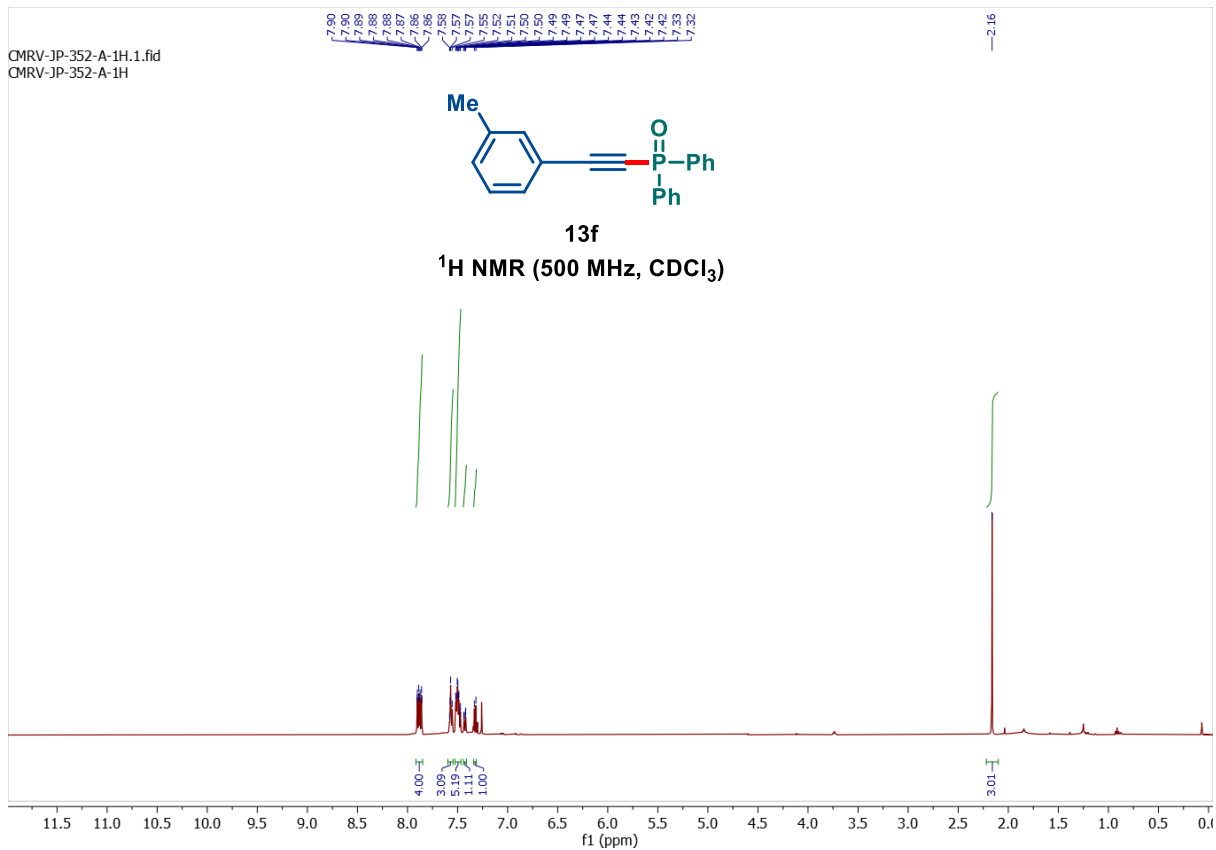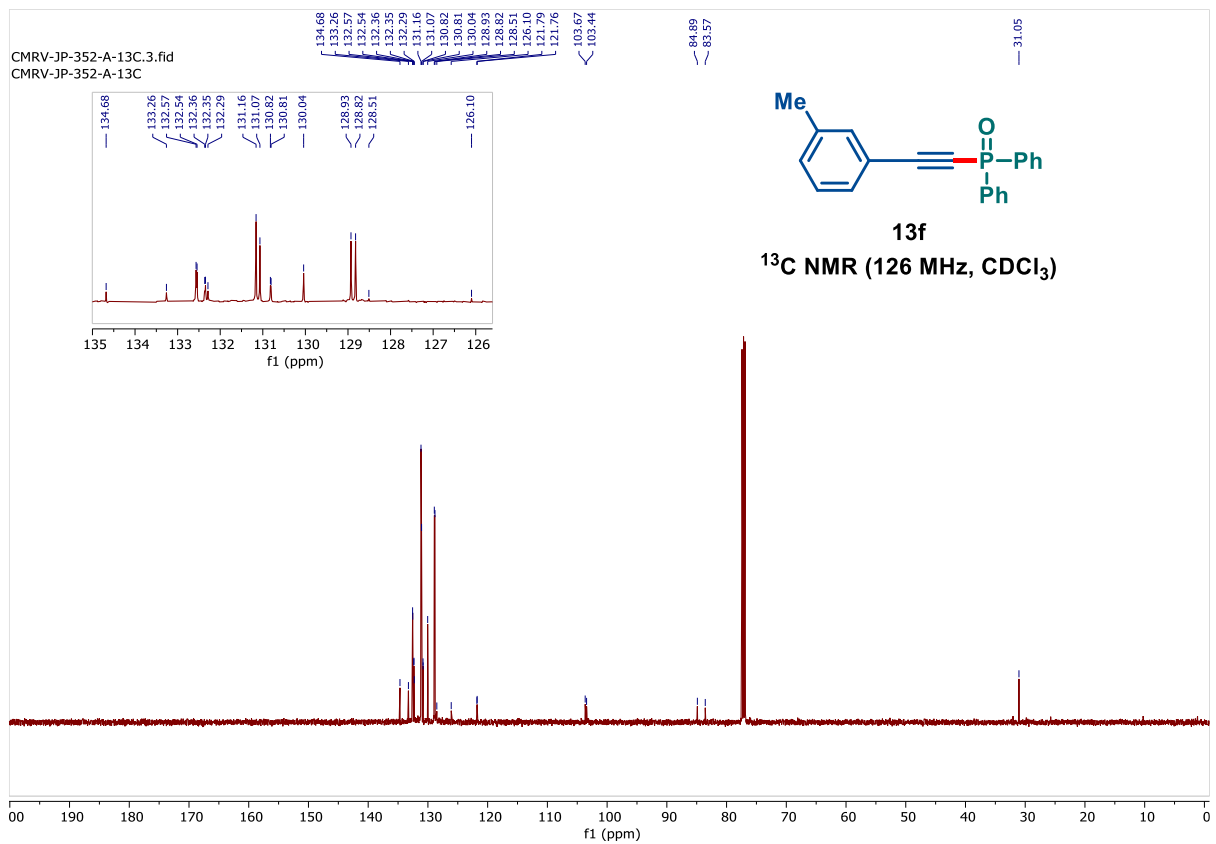

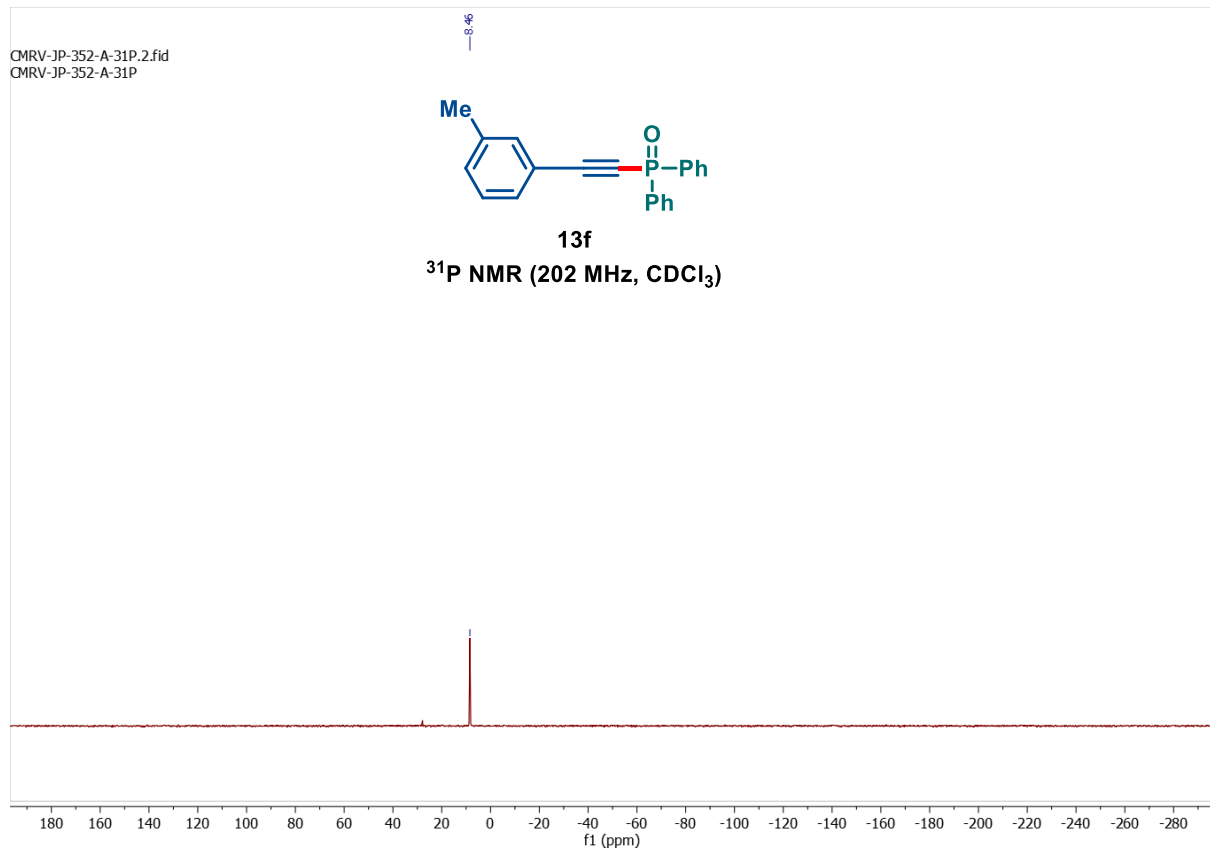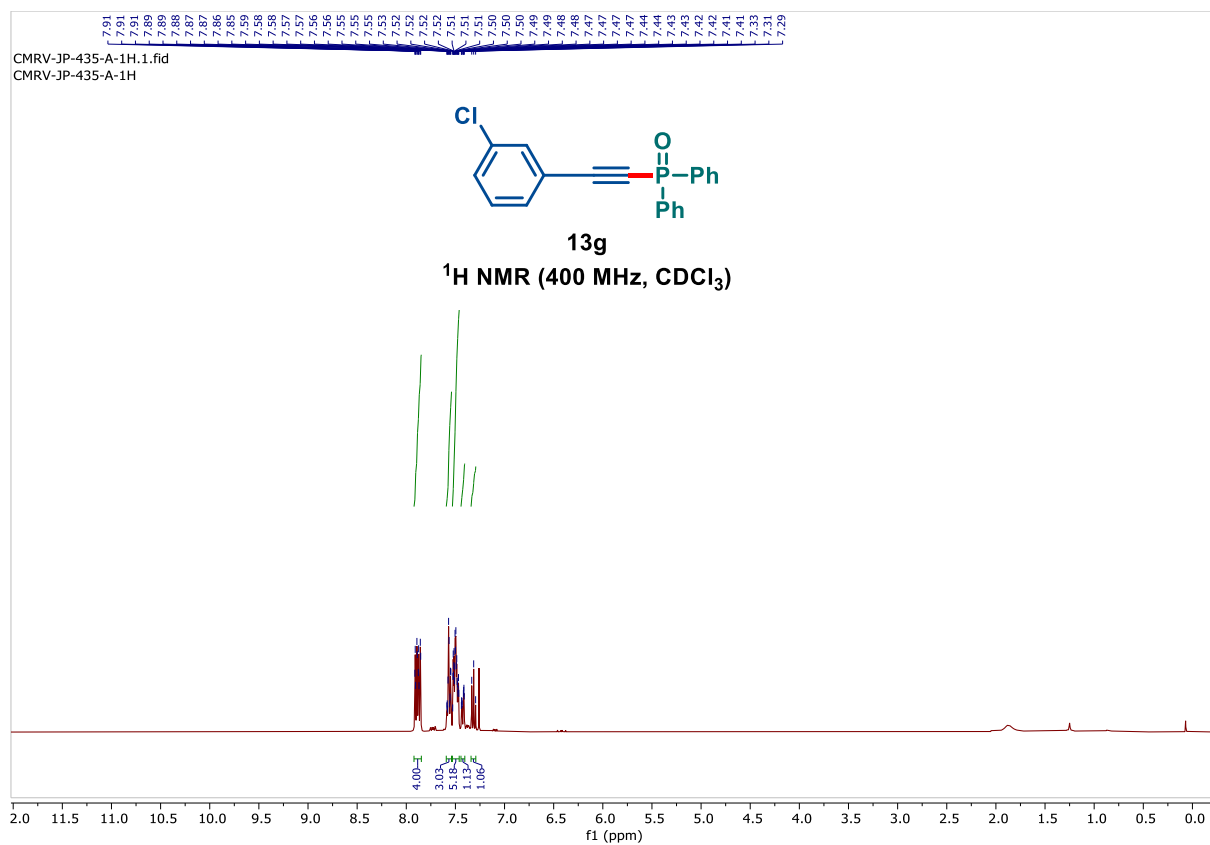

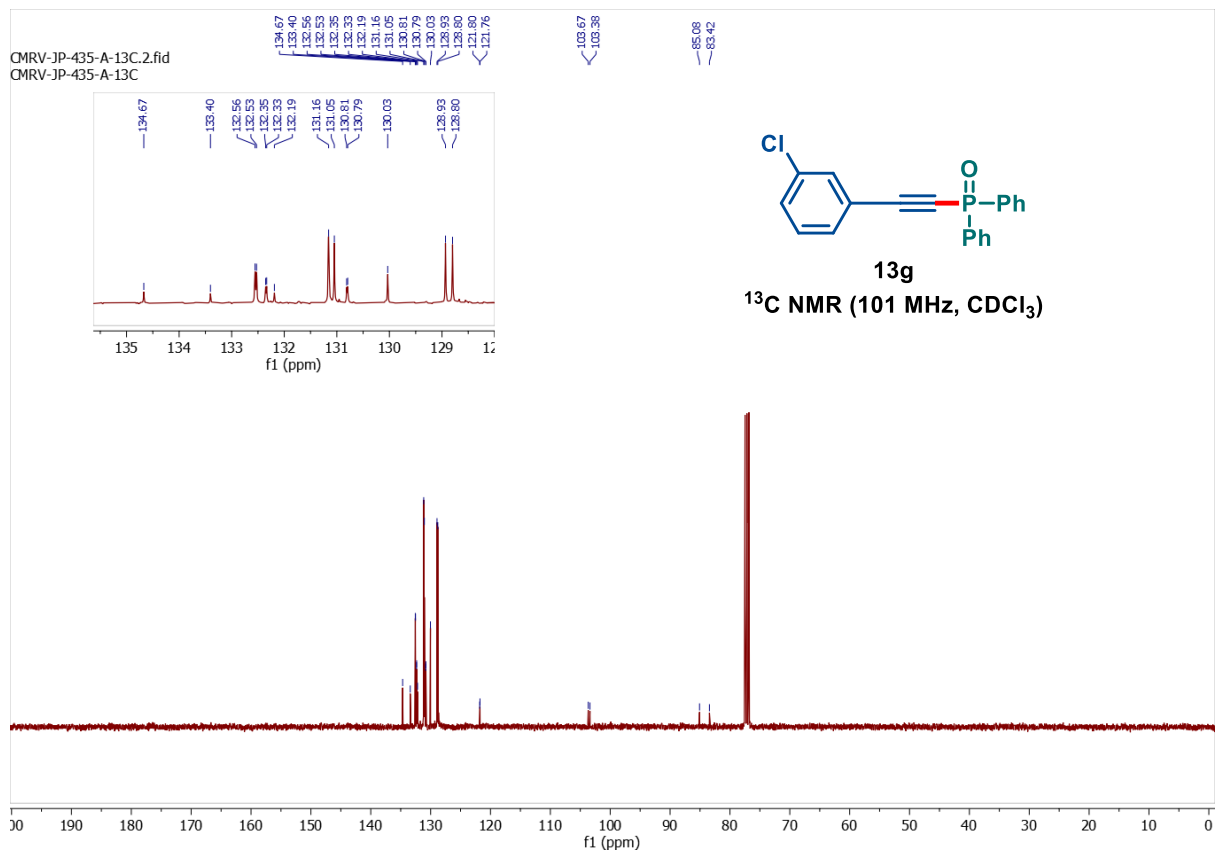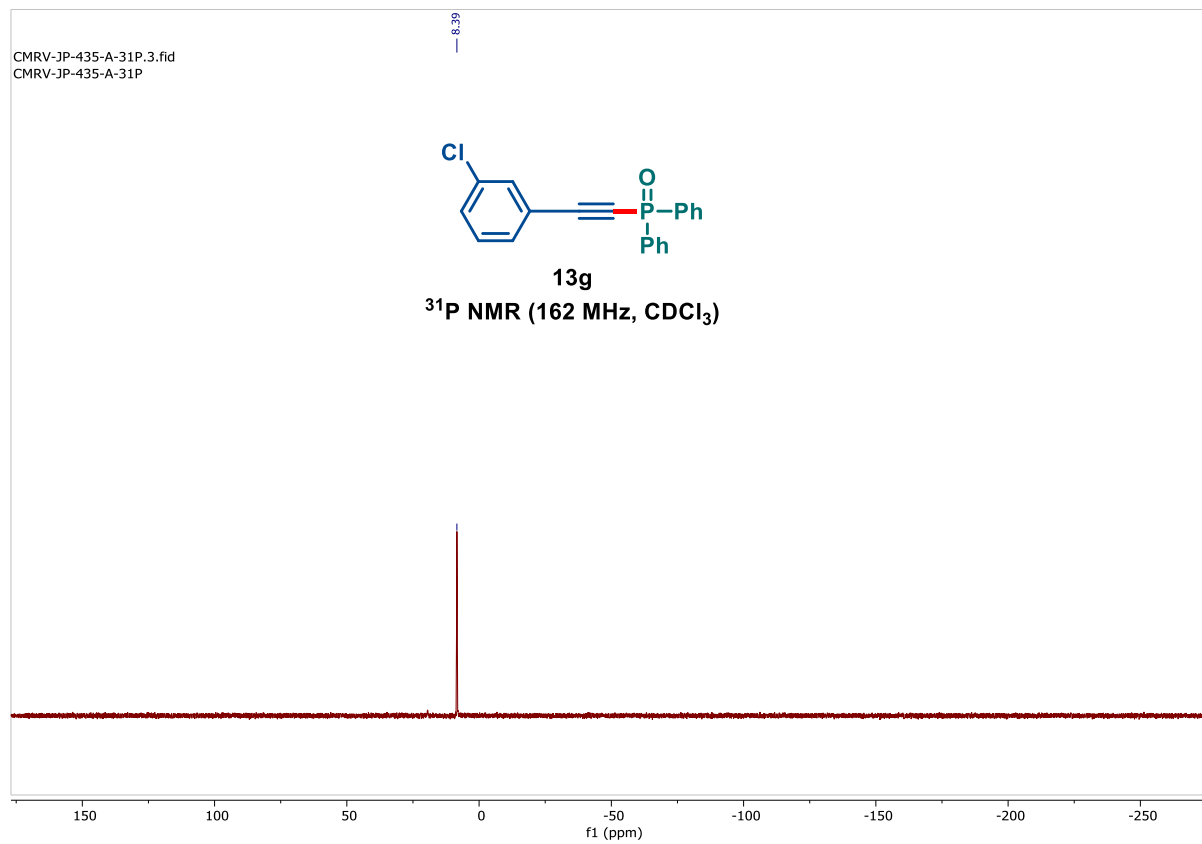

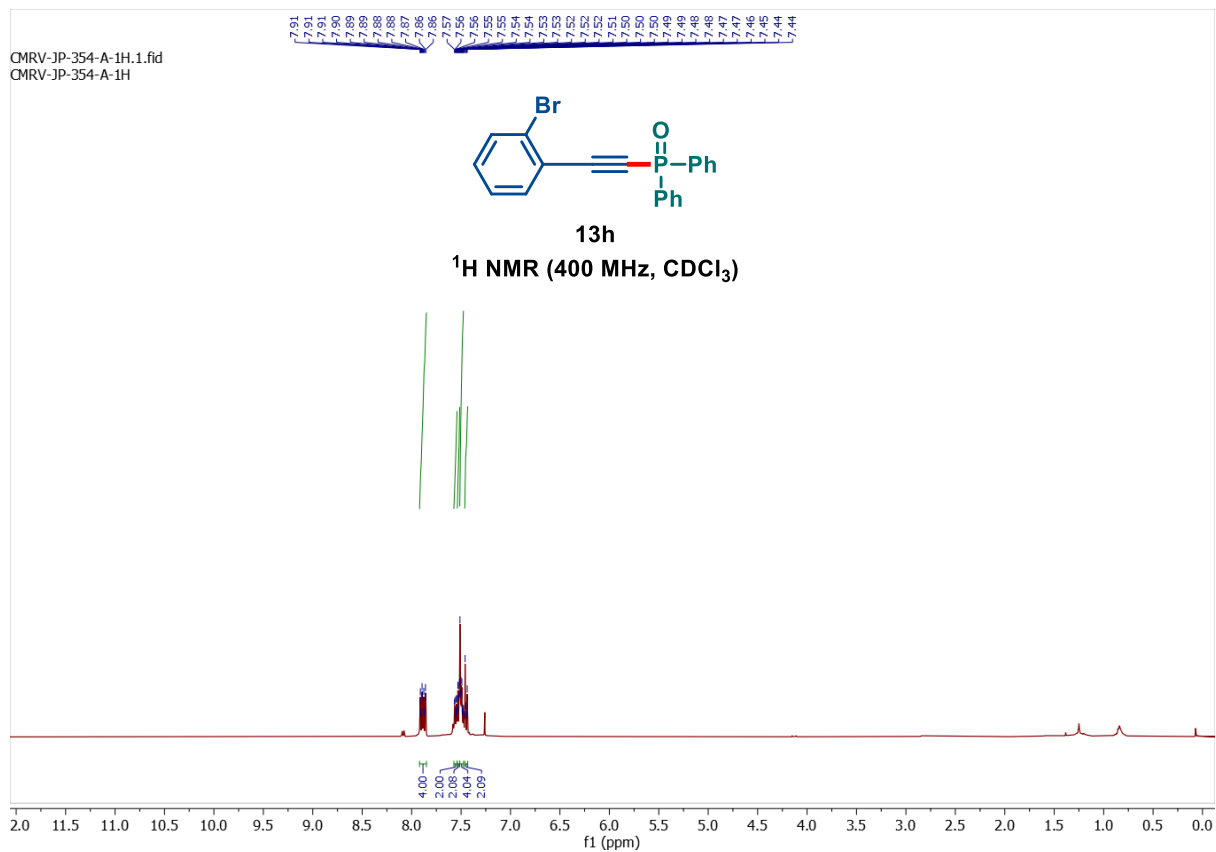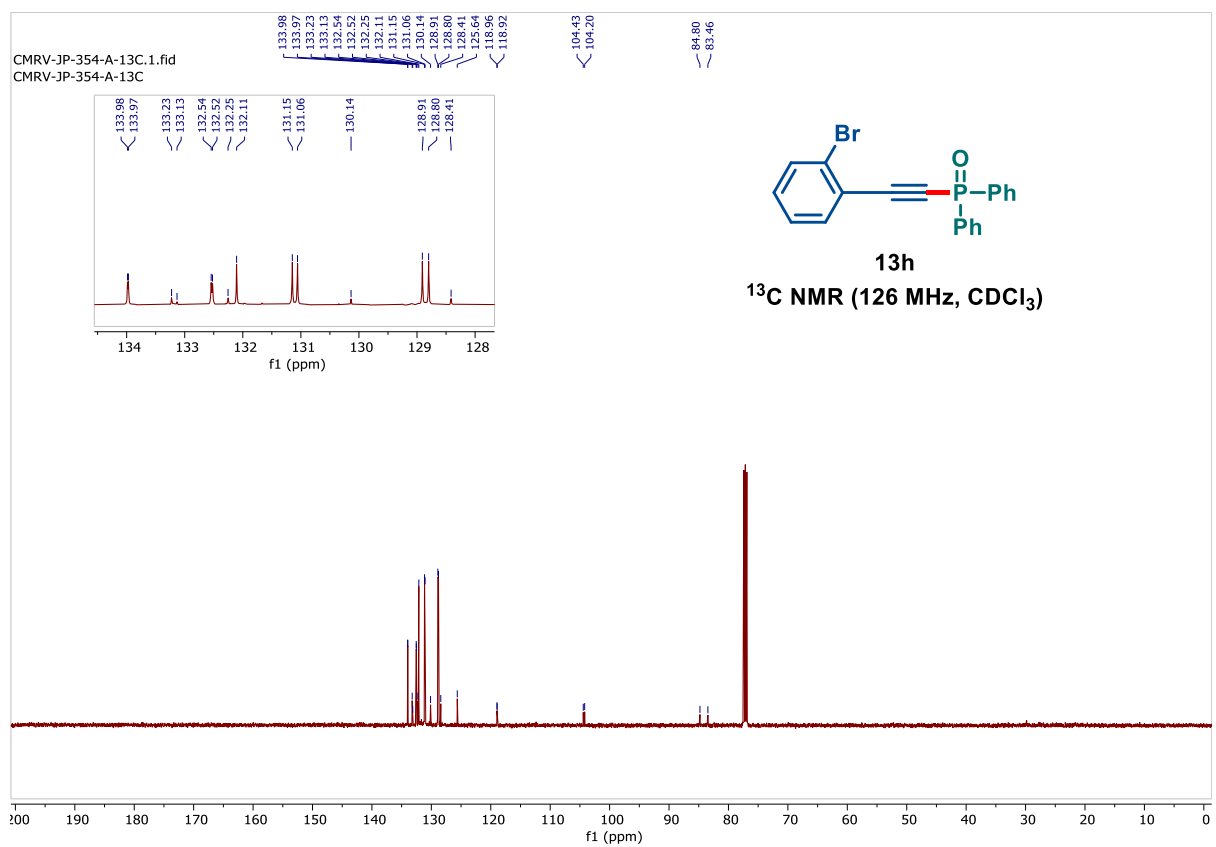

OMRV-JP-354-A-31P.10.fid  
OMRV-JP-354-A-31P

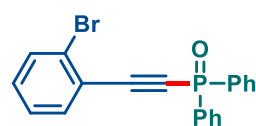

13h

$^{31}\text{P}$  NMR (162 MHz,  $\text{CDCl}_3$ )

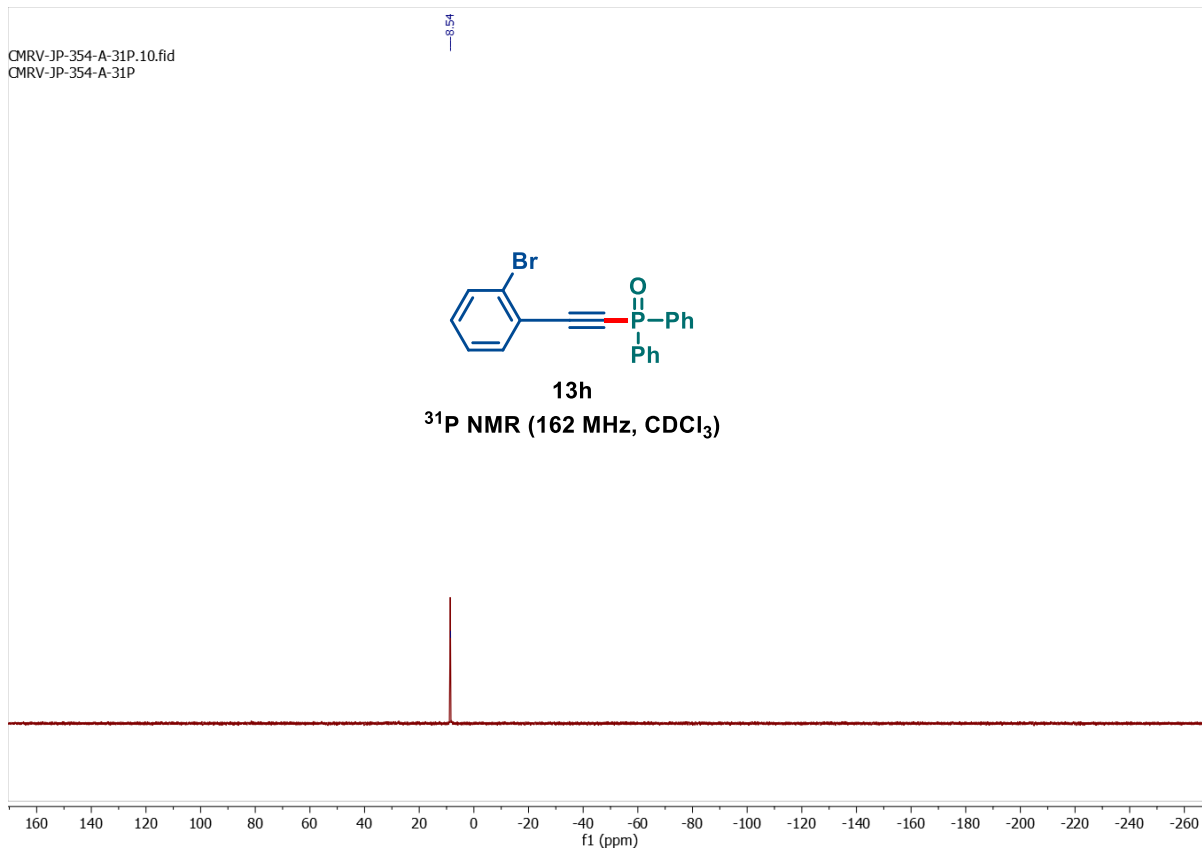

OMRV-JP-456-A-1H.1.fid  
OMRV-JP-456-A-1H

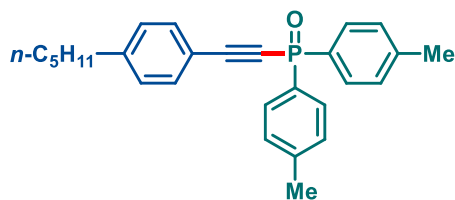

13i

$^1\text{H}$  NMR (500 MHz,  $\text{CDCl}_3$ )

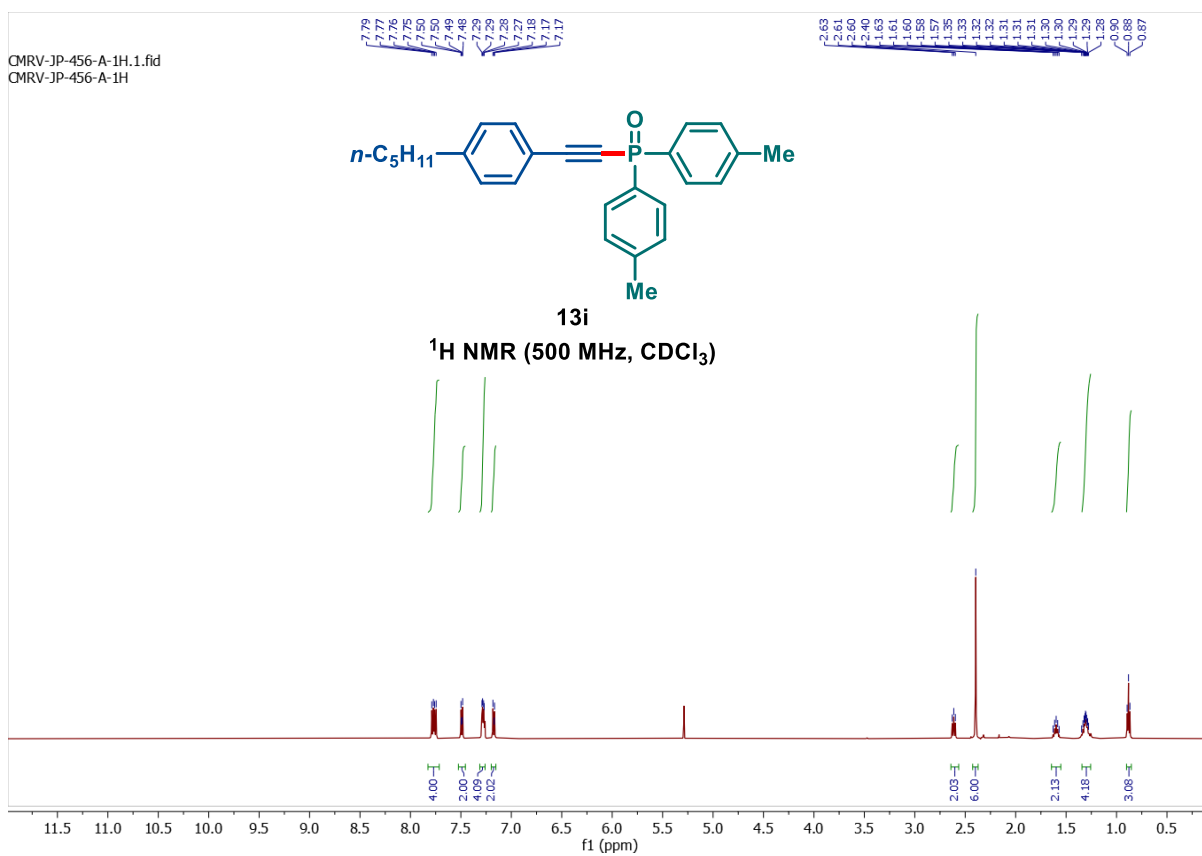

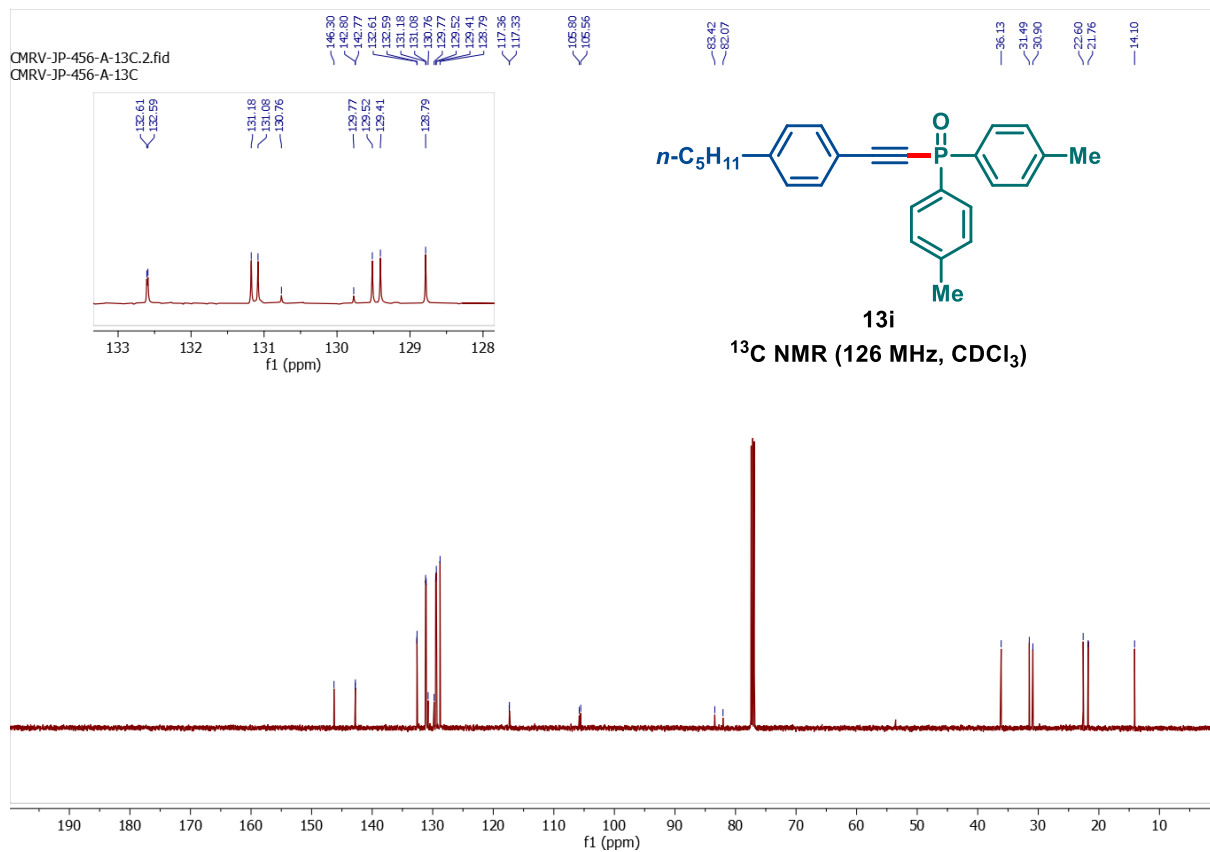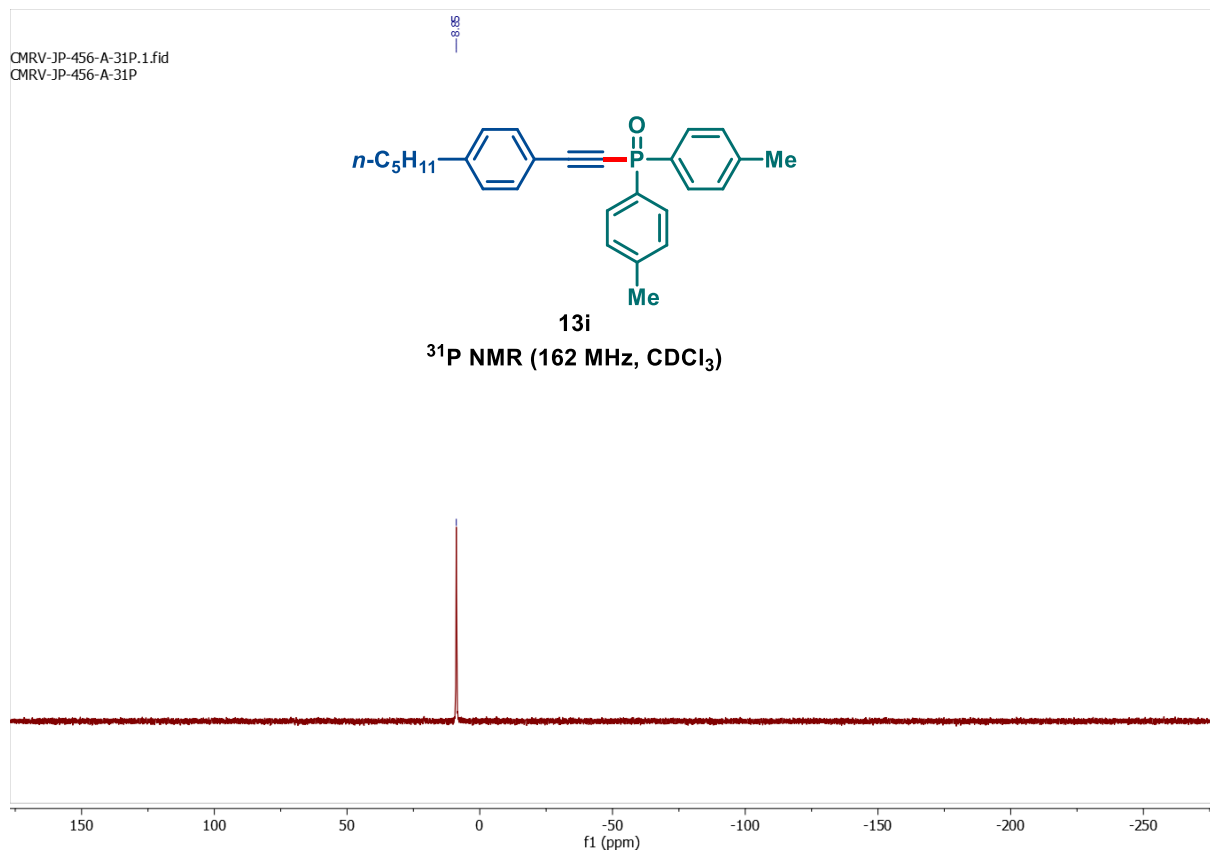





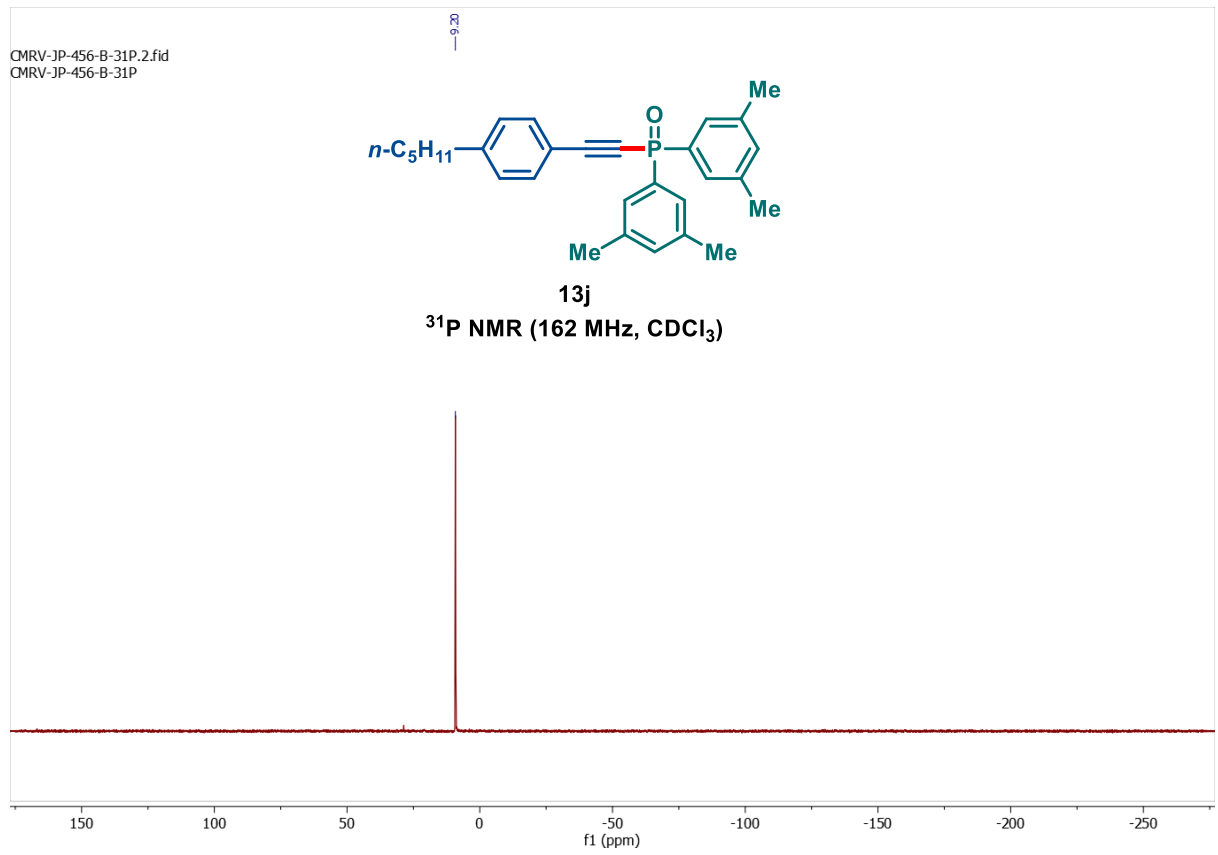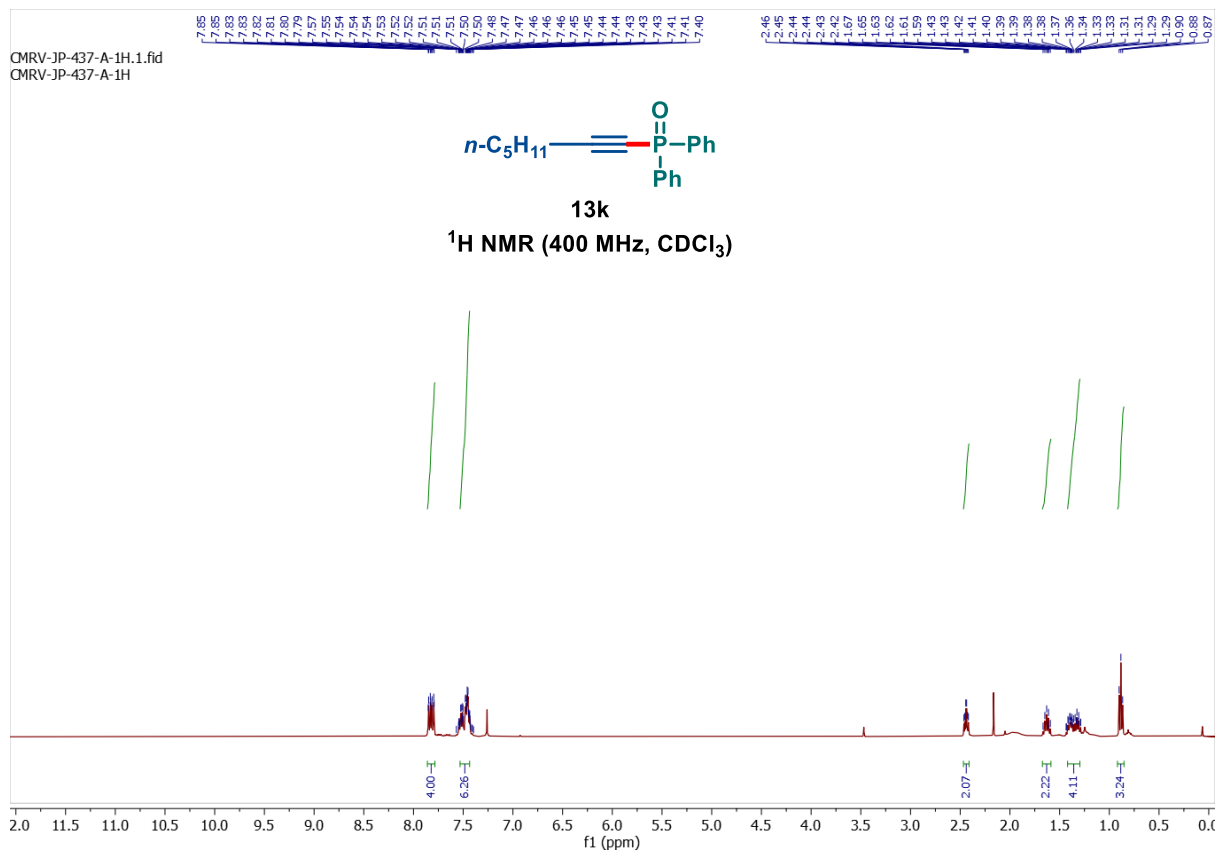

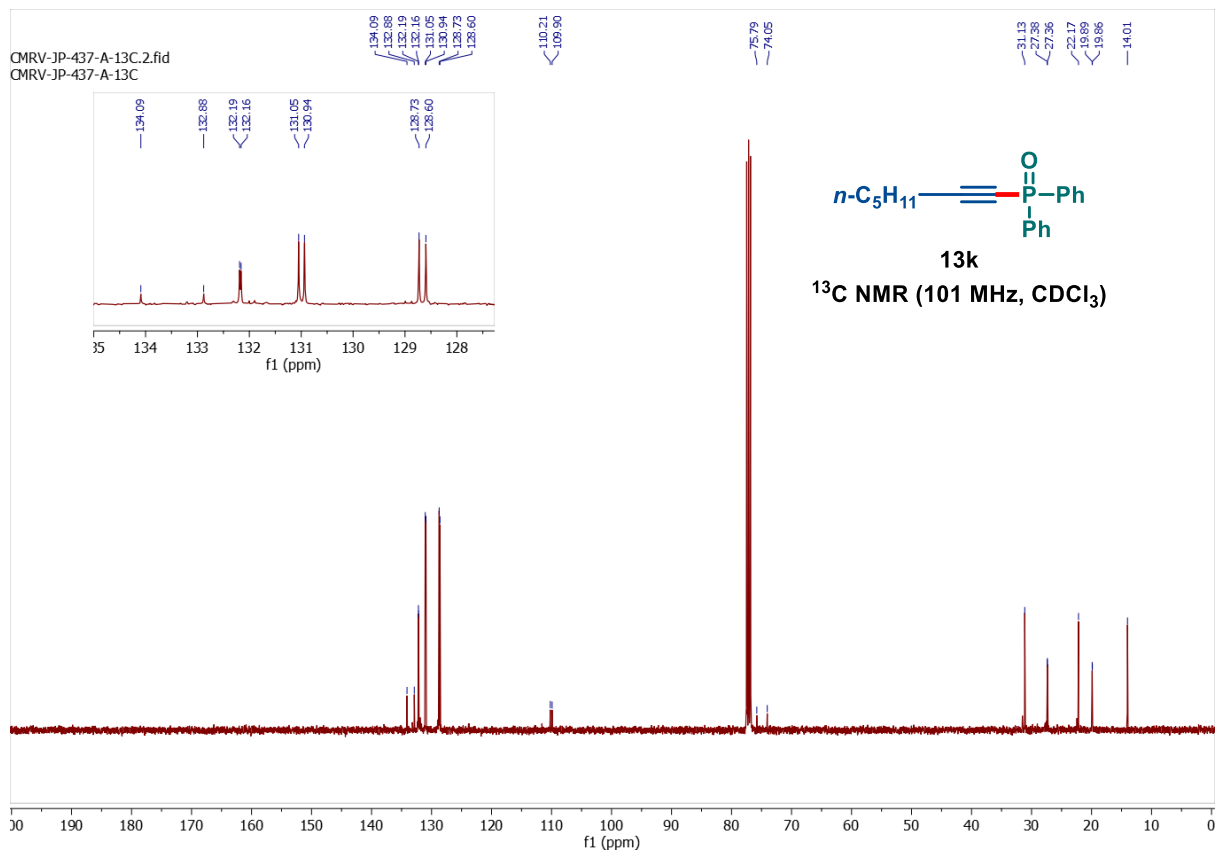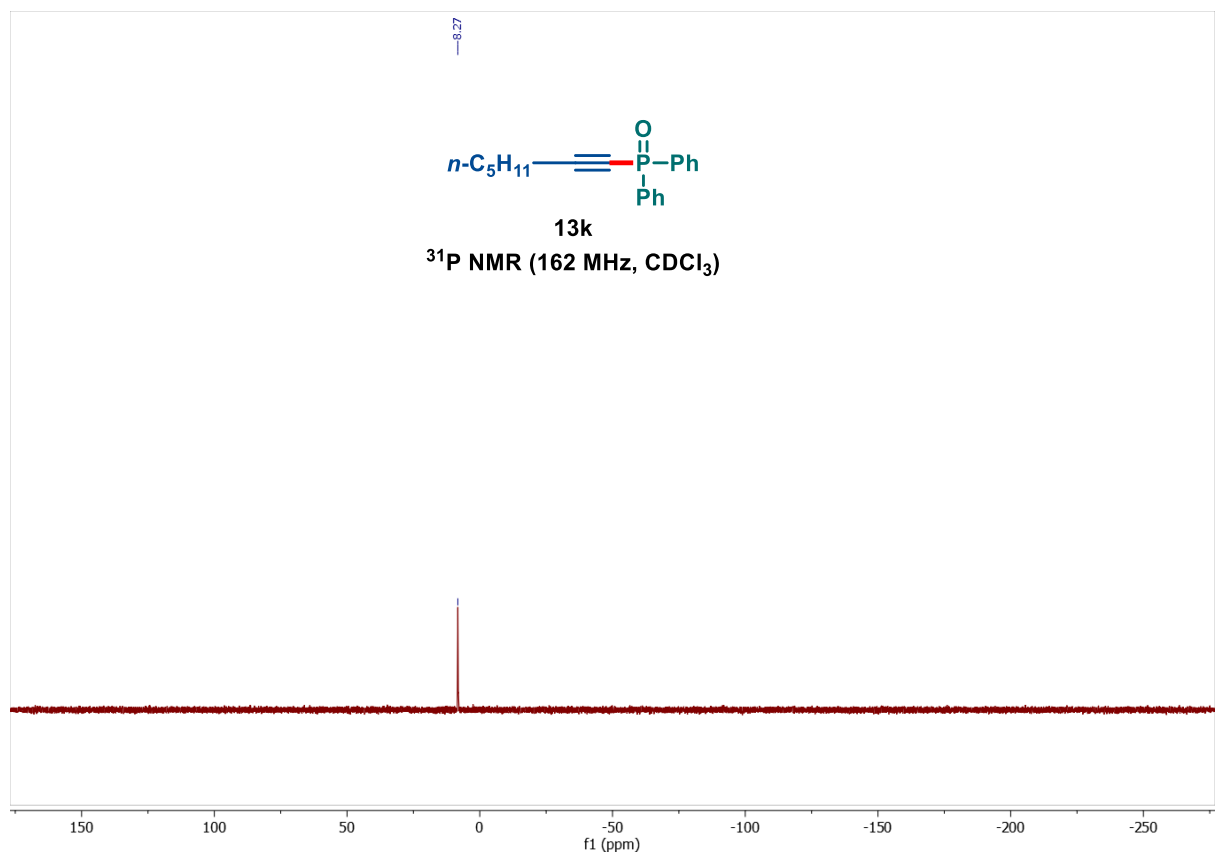

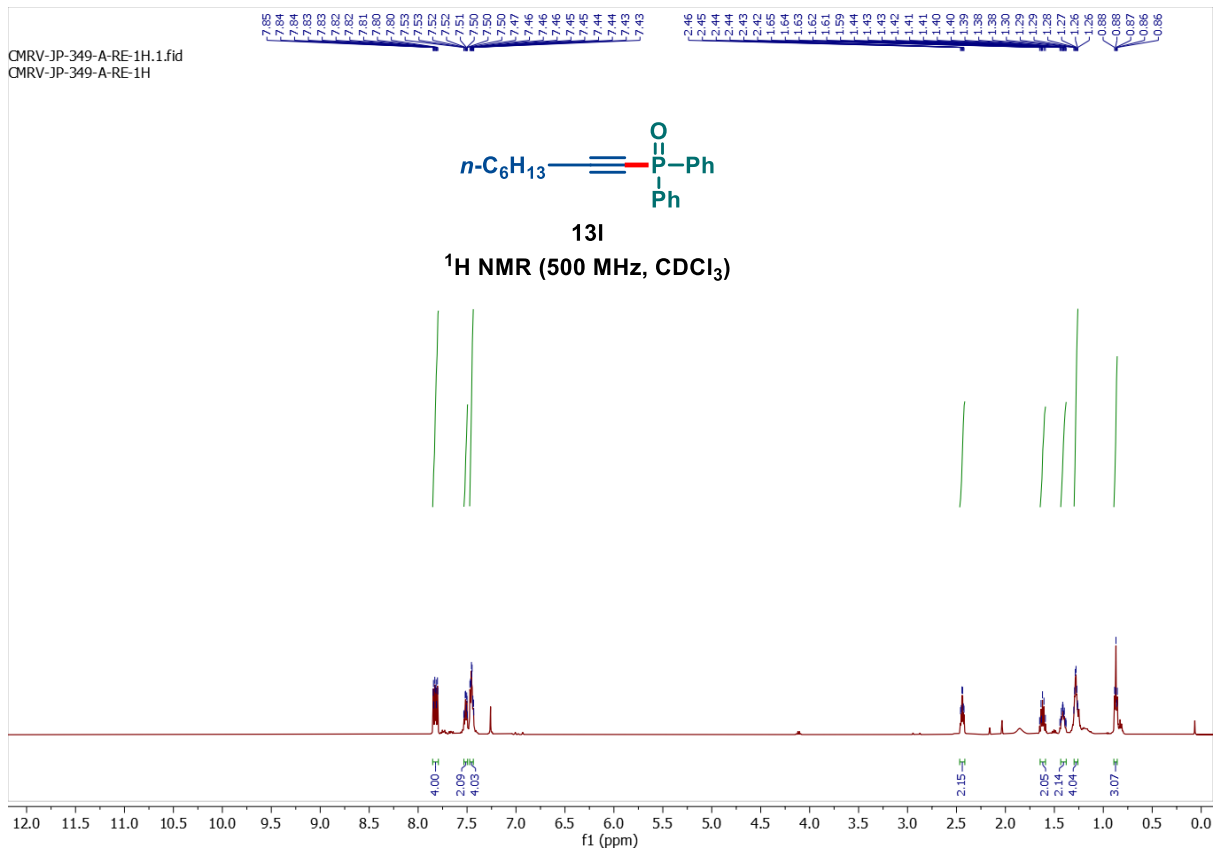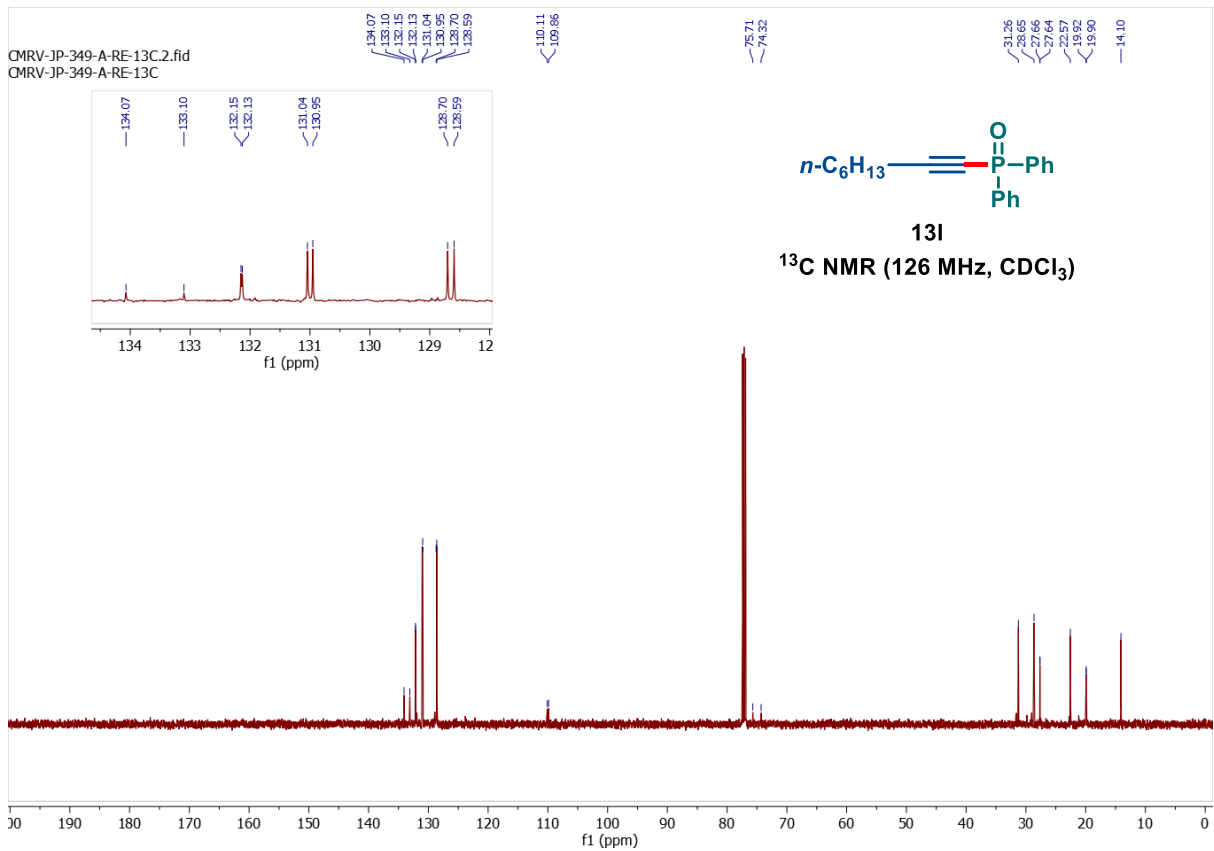

OMRV-JP-349-A-RE-31P.3.fid  
OMRV-JP-349-A-RE-31P

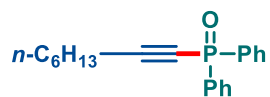

13I

<sup>31</sup>P NMR (202 MHz, CDCl<sub>3</sub>)

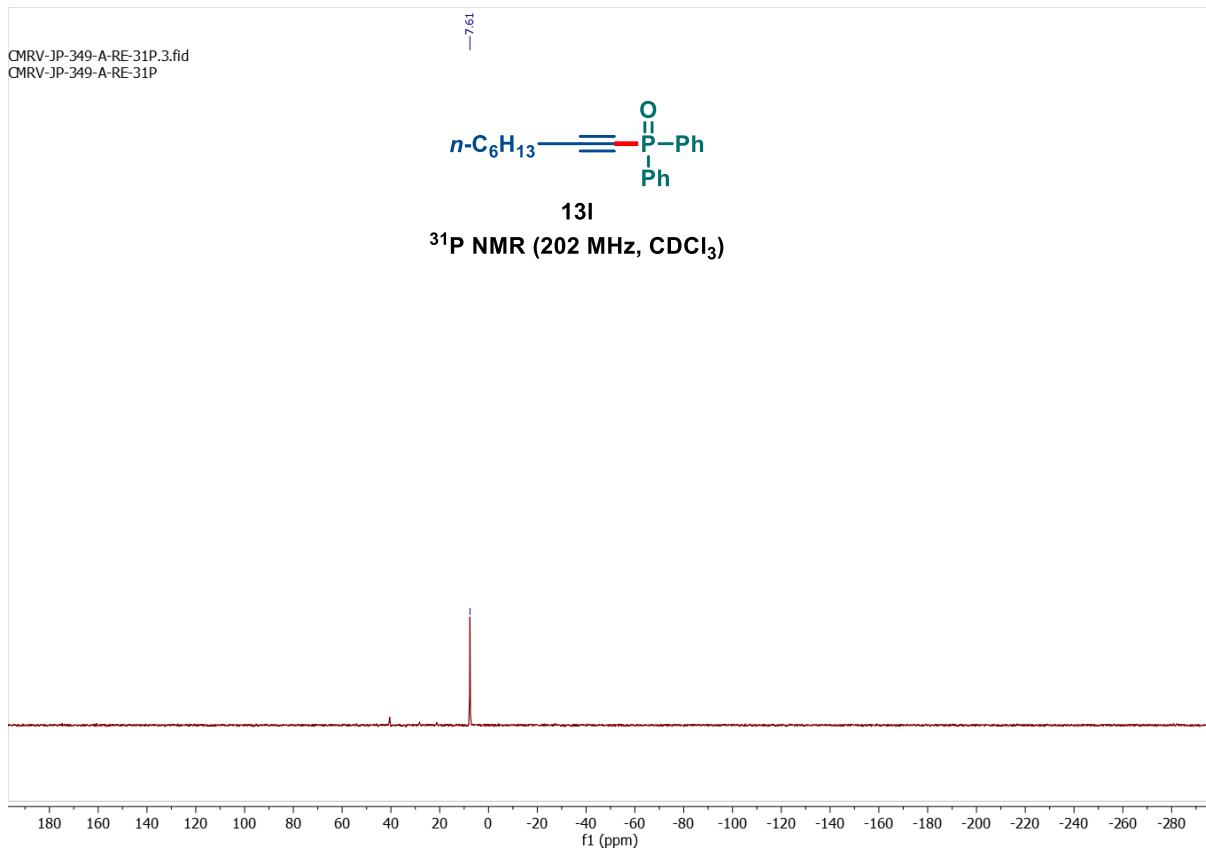

OMRV-JP-469-1H.1.fid  
OMRV-JP-469-1H

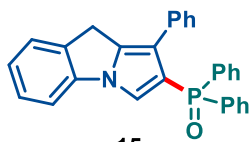

15

<sup>1</sup>H NMR (400 MHz, CDCl<sub>3</sub>)

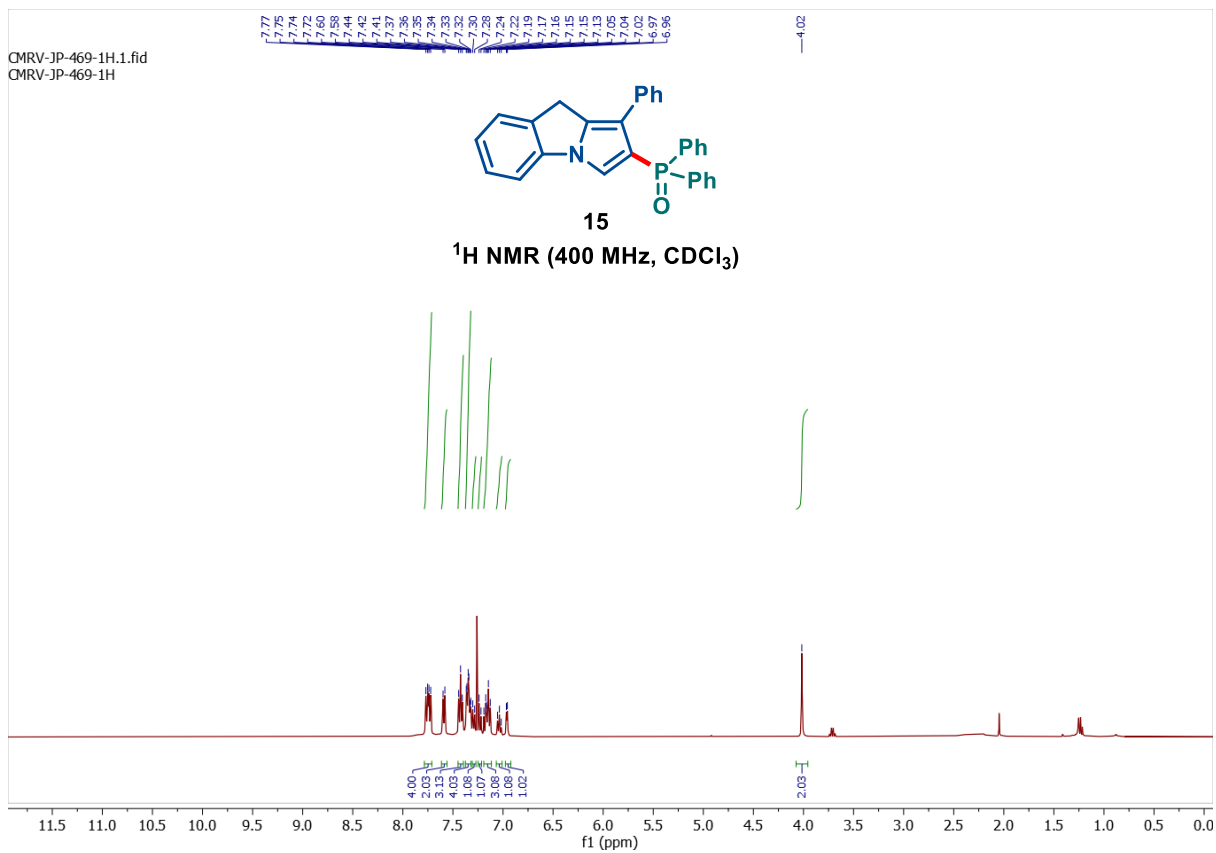

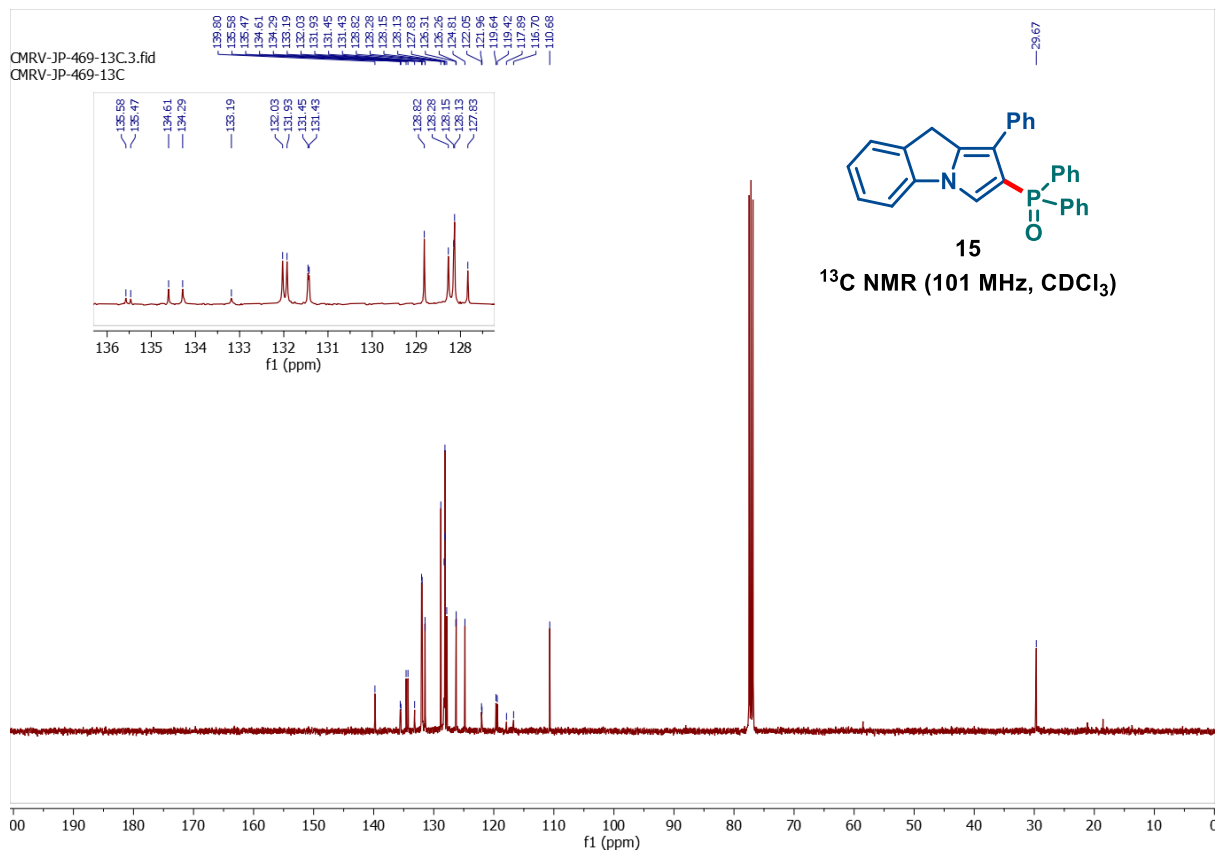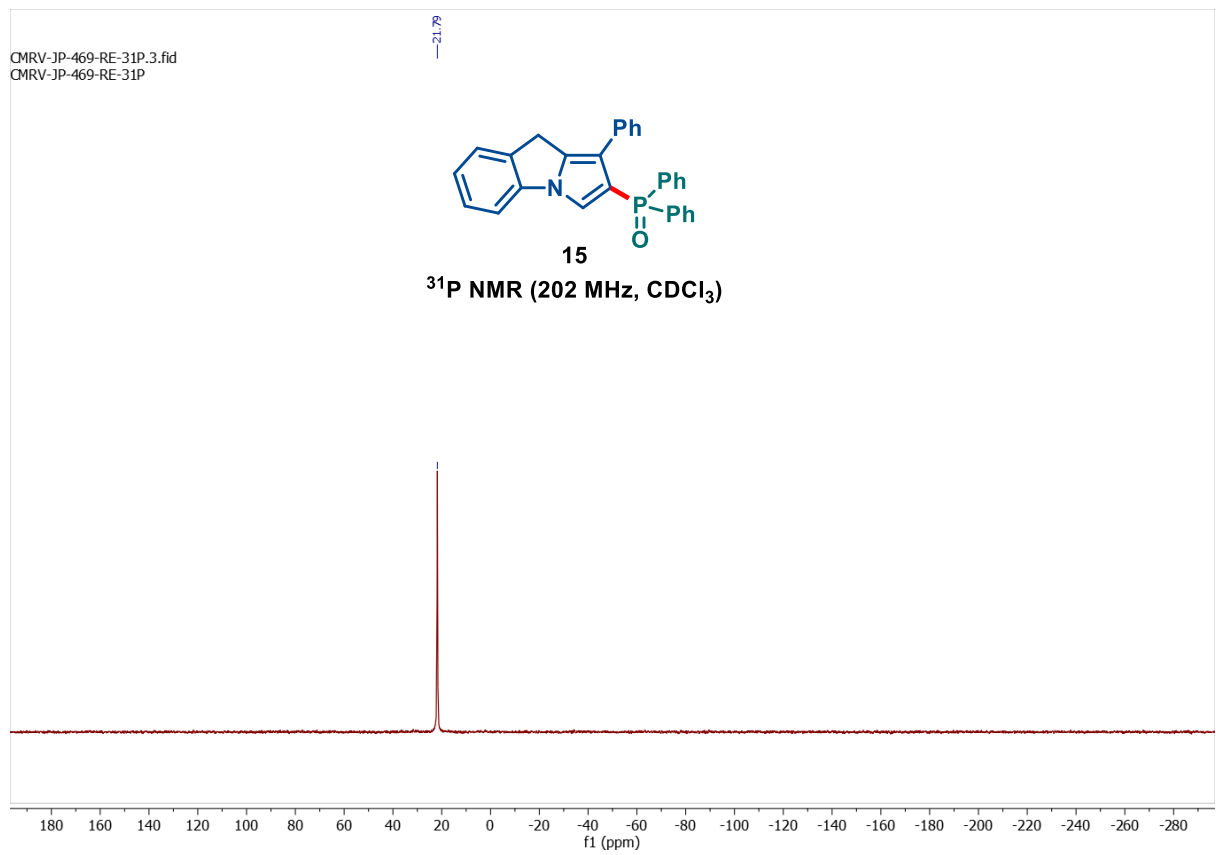

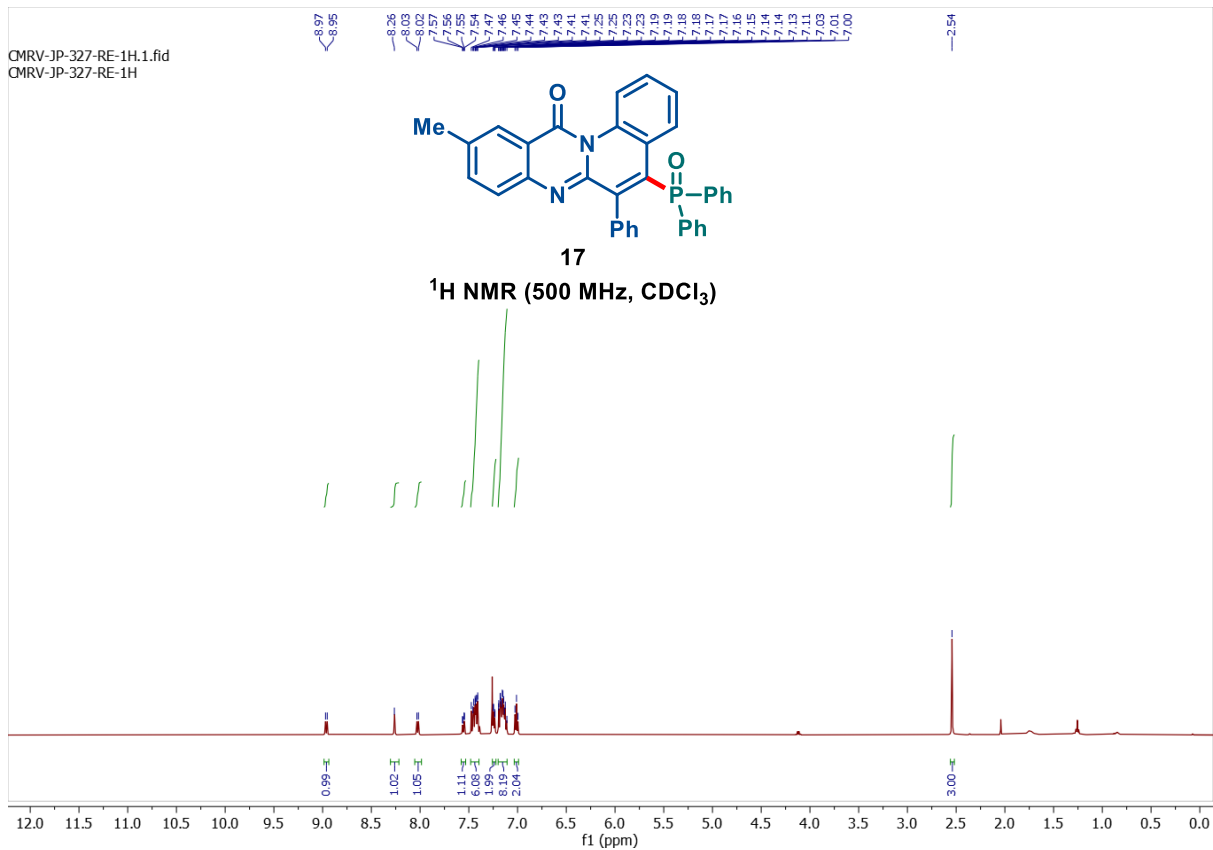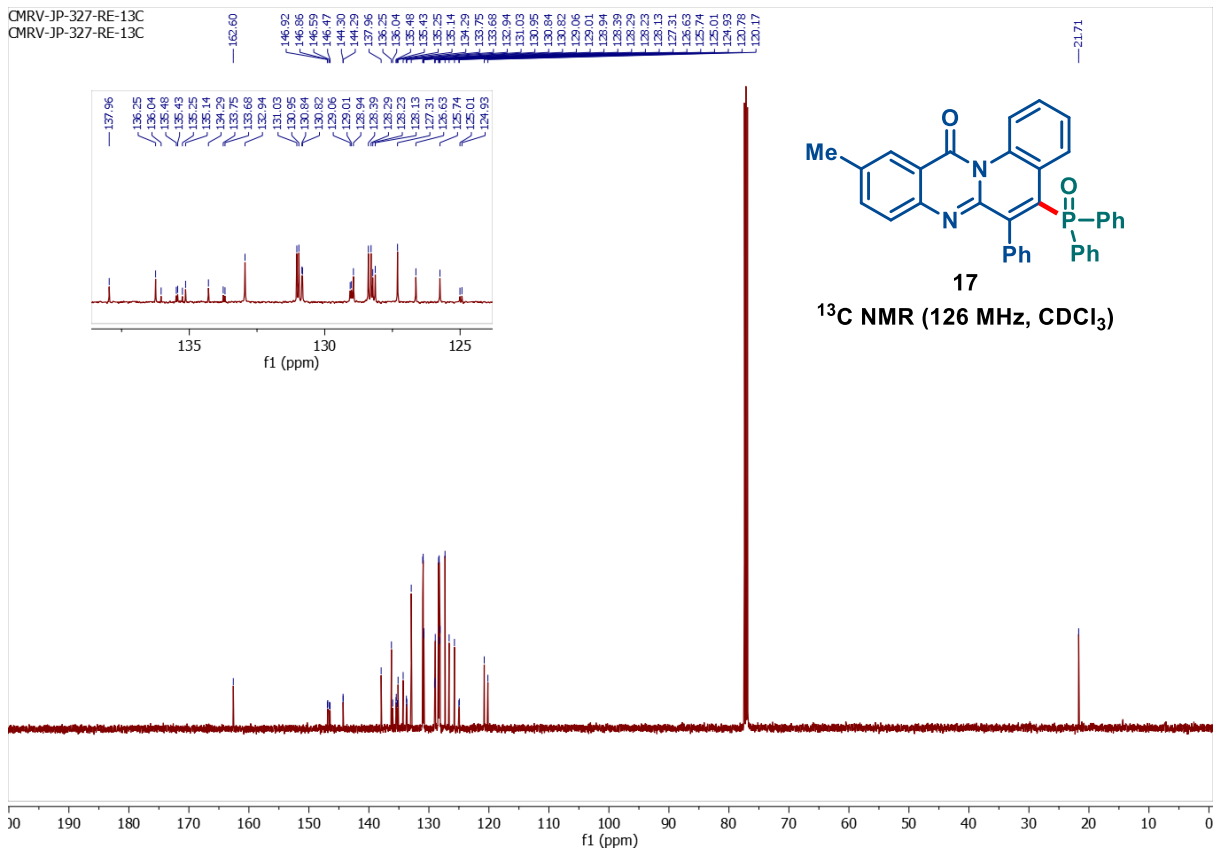

OMRV-JP-327-RE-31P.4.fid  
OMRV-JP-327-RE-31P

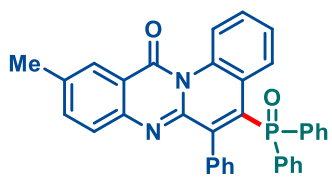

17

<sup>31</sup>P NMR (202 MHz, CDCl<sub>3</sub>)

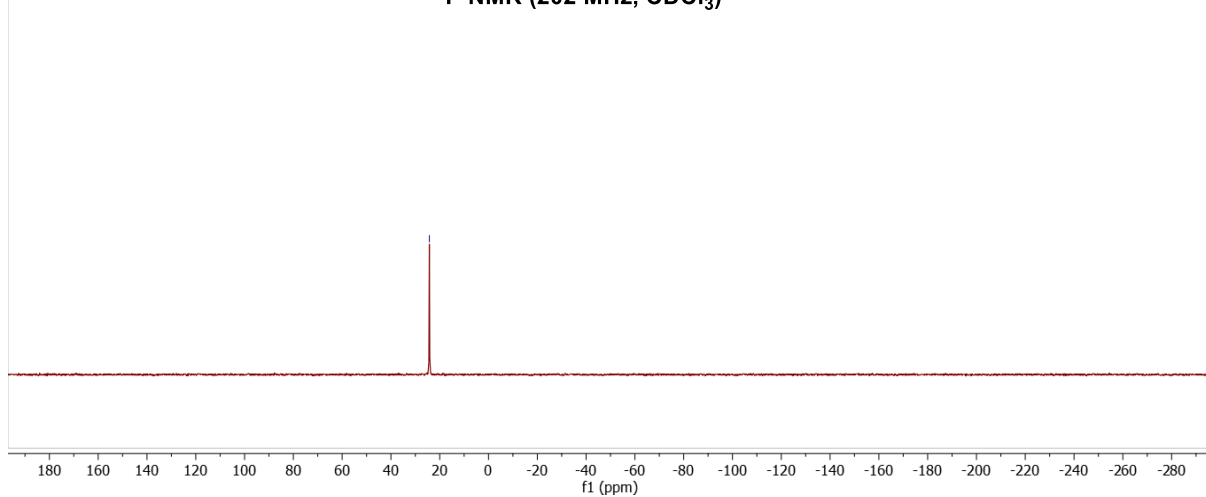

Supplement: d4sc00692e1.pdf [file d4sc00692e1.pdf]
